# Supplementary material
Source: PubMed Central journal article supplement (PMC3565443)
Supplement: mmi0084-0832-SD1.pdf [file mmi0084-0832-SD1.pdf]

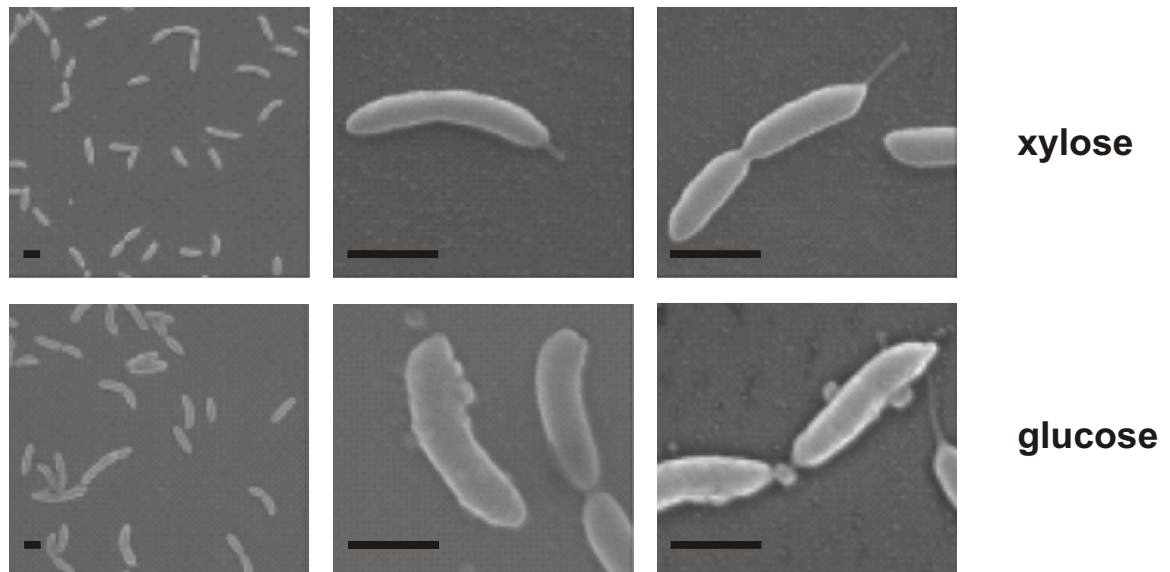

**Figure S1:** Scanning electron microscopy of *Caulobacter crescentus* after shut-down of BamD expression. To assess the phenotype of *C. crescentus* after depletion of BamD, we constructed a strain with BamD under the control of a xylose-inducible promoter (see Methods). The strain is viable on medium containing xylose, but inviable when xylose is absent from the growth medium, demonstrating that the *bamD* gene is essential in *C. crescentus*. Scanning electron microscopy was used to monitor the depletion of BamD after shifting the strain from growth medium containing 0.03% (w/v) xylose to medium containing 0.2% (w/v) glucose: depletion of BamD resulted in drastic changes to the surface of *C. crescentus*. Scale bars represent 1 μm.

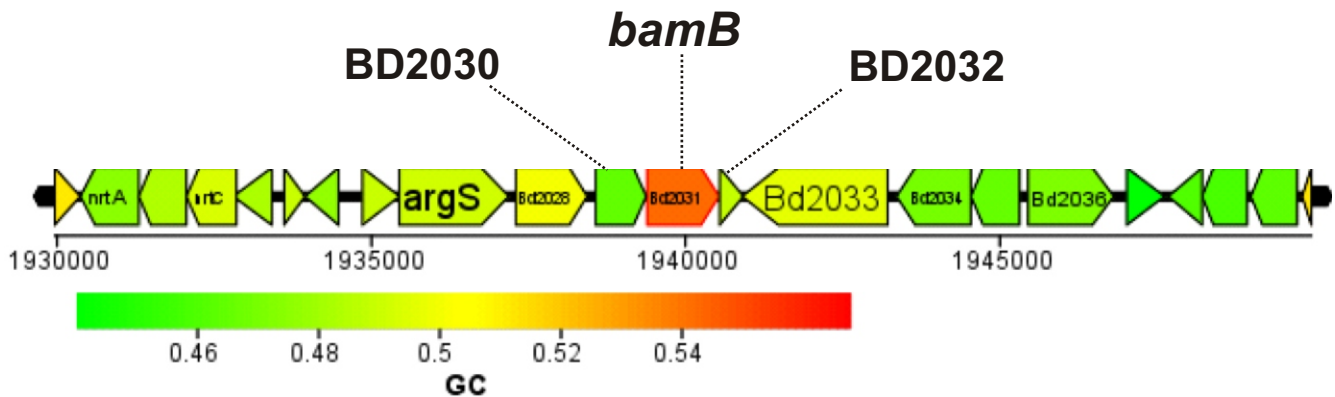

**Figure S2:** Gene context of the predicted *bamB* gene in the genome of *Bdellovibrio bacteriovorus* HD100. The GC content of the genome of str. Hd100 was mapped across the chromosomal locus encompassing the gene BD2031 (*bamB*) using XBASE (Chaudhuri, R.R., Loman, N.J., Snyder, L.A., Bailey, C.M., Stekel, D.J., Pallen M.J. (2008) *Nucleic Acids Res.* 36(Database issue):D543-546). The upstream gene BD2030 encodes a protein of unknown function conserved only in other  $\delta$ -proteobacteria. Together with characterized genes such as *argS*, it defines this chromosomal locus. The down-stream sequence BD2032 is not conserved in other  $\delta$ -proteobacteria, but is highly similar (40-50% sequence identity) to sequences in the genomes of various bacteria (closest relatives *Neisseria weaverii* and *Kingella oralis*), and the Conserved Domain Architecture Tool suggests sequence similarity with L-413C-like integrases. Evidence that the BD2031(*bamB*) gene is functional in *B. bacteriovorus* comes from an observed 6-fold induction of gene expression on the switch from (non replicating) predatory hunter form to axenic grower on peptone rich media (Lambert, C., Chang, C.Y., Capeness, M.J., Sockett, R.E. (2010) *PLoS One* 5:e8599).

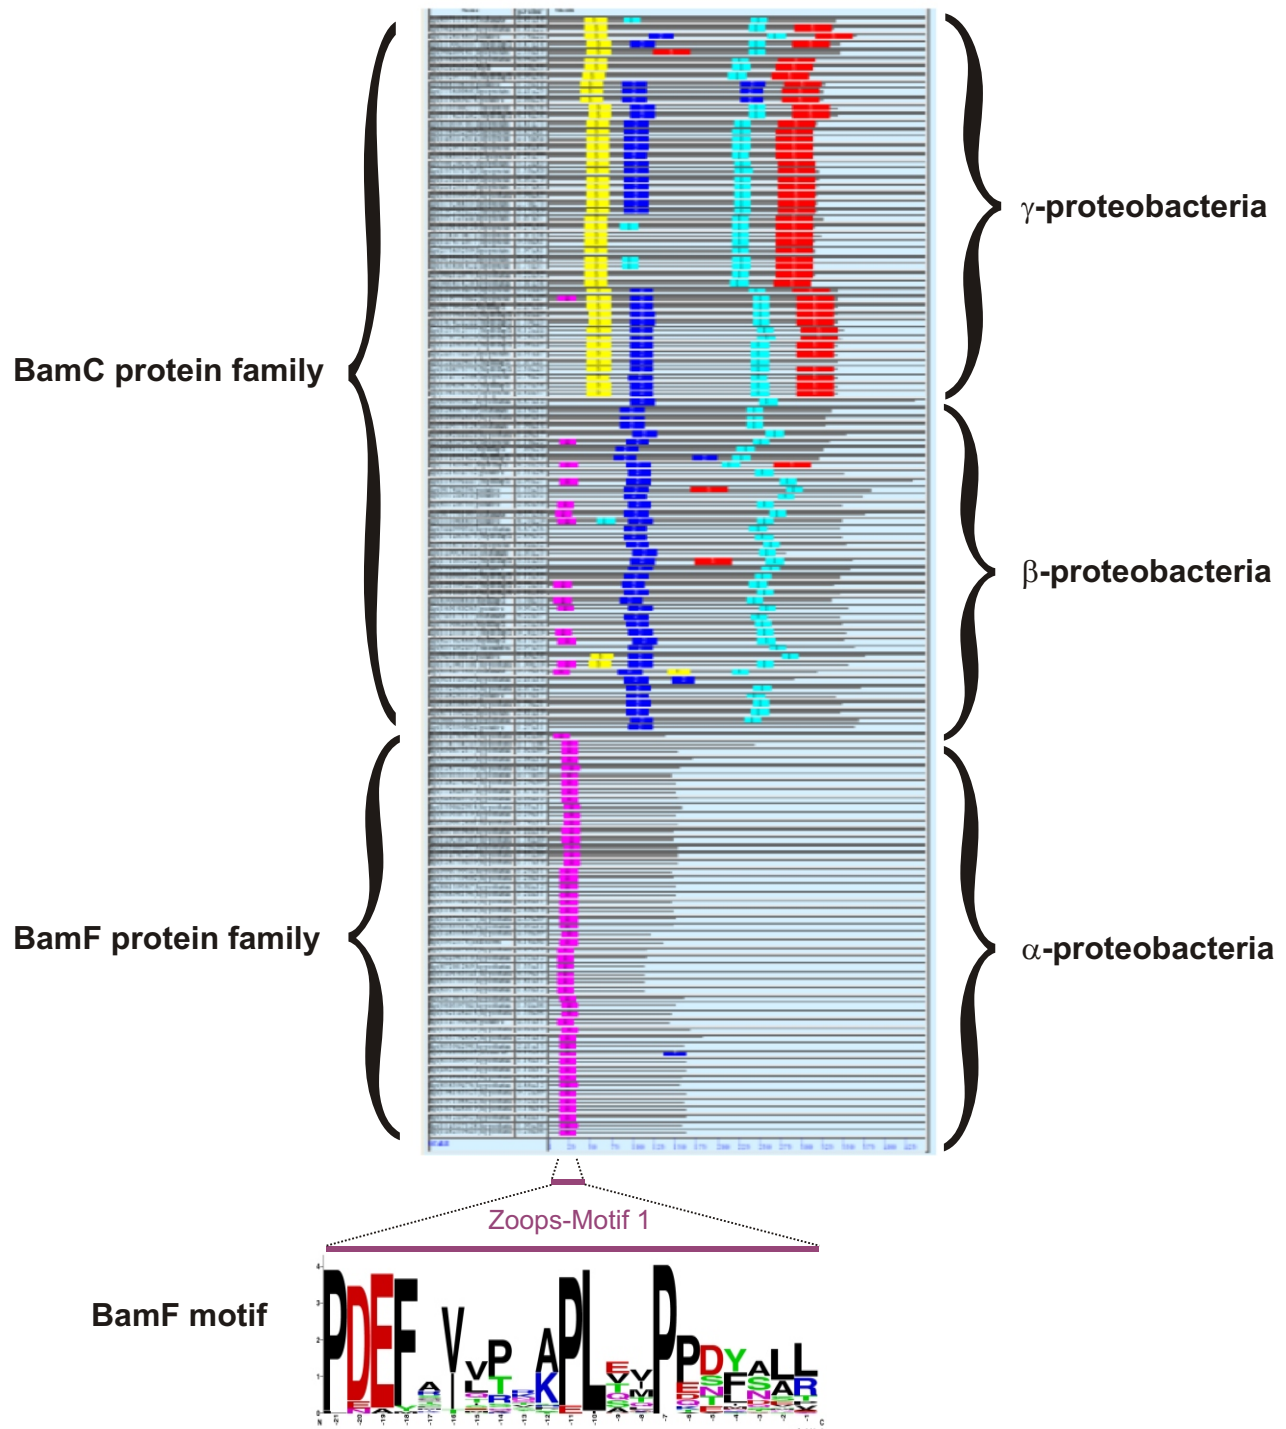

**Figure S3.** Motif analysis of the BamC-family of proteins and the BamF-family of proteins. Each of the protein sequences analysed is represented as a single line, and these have been sorted into species of  $\gamma$ -proteobacteria,  $\beta$ -proteobacteria and  $\alpha$ -proteobacteria. The common motifs are shown as colored boxes on each protein sequence: “Zoops motif 1” (colored in pink) corresponds to the sequence logo shown as the BamF motif. It is found in all  $\alpha$ -proteobacterial BamF proteins and also in many  $\beta$ -proteobacterial BamC proteins. Although the motif is not strictly conserved in  $\gamma$ -proteobacteria, the corresponding region in all BamC sequences shows some sequence similarity (documented in Figure 4). There are three strongly-conserved motifs within the structured domains of  $\gamma$ -proteobacterial and  $\beta$ -proteobacterial BamC sequences (the motifs are shown in blue, cyan and red) that define elements of the 'helix-grip' fold. In addition, a short conserved motif ( $E=2.5 \times 10^{-156}$ ; colored in yellow) was found in the N-terminal 'unstructured' region: it sits between the helix-grip domains and the region of sequence conserved across the BamF- and BamC-protein families. In the *E. coli* BamC sequence, this “motif 2” appears

| CDPro Algorithm | $\alpha$ - helix | $\beta$ - sheet | turns | unordered |
|-----------------|------------------|-----------------|-------|-----------|
| CONTIN          | 65               | 4               | 12    | 19        |
| SELCON3         | 67               | 4               | 11    | 18        |
| CDSSTR          | 82               | 5               | 6     | 7         |

**Table S1.** Calculation of secondary structure components (%) from the CD spectra of BamD. Calculations were performed using the CDPro software package (Sreerama N & Woody RW, 2004).

**Supplementary Table 2**

|                                      |           |       |                |                                                                                                |
|--------------------------------------|-----------|-------|----------------|------------------------------------------------------------------------------------------------|
| Acetobacter pasteurianus IFO 3283-01 | 5.10E-021 | BamB  | YP_003188239.1 | dehydrogenase                                                                                  |
| Acetobacter pasteurianus IFO 3283-01 | 2.50E-007 | BamB  | YP_003188704.1 | alcohol dehydrogenase large subunit                                                            |
| Acetobacter pasteurianus IFO 3283-01 | 7.00E-007 | BamB  | YP_003186624.1 | alcohol dehydrogenase large subunit<br>glucose dehydrogenase, methanol dehydrogenase subunit 1 |
| Acetobacter pasteurianus IFO 3283-01 | 8.70E-005 | BamB  | YP_003188649.1 |                                                                                                |
| Acetobacter pasteurianus IFO 3283-01 | 1.00E-019 | BamD  | YP_003188411.1 | hypothetical protein APA01_19070                                                               |
| Acetobacter pasteurianus IFO 3283-01 | 9.30E-013 | BamE  | YP_003188212.1 | lipoprotein SmpA/OmlA                                                                          |
| Acetobacter pasteurianus IFO 3283-01 | 9.10E-005 | BamE  | YP_003188097.1 | hypothetical protein APA01_15790                                                               |
| Acetobacter pasteurianus IFO 3283-01 | 2.40E-111 | Omp85 | YP_003187185.1 | outer membrane protein                                                                         |
| Acetobacter pasteurianus IFO 3283-01 | 2.90E-006 | Omp85 | YP_003187610.1 | outer membrane protein                                                                         |
| Acidiphilium cryptum JF-5            | 7.20E-022 | BamB  | YP_001233890.1 | Pyrrolo-quinoline quinone                                                                      |
| Acidiphilium cryptum JF-5            | 1.40E-008 | BamB  | YP_001234864.1 | Pyrrolo-quinoline quinone                                                                      |
| Acidiphilium cryptum JF-5            | 6.50E-007 | BamB  | YP_001234695.1 | Pyrrolo-quinoline quinone                                                                      |
| Acidiphilium cryptum JF-5            | 1.70E-006 | BamB  | YP_001235907.1 | Pyrrolo-quinoline quinone                                                                      |
| Acidiphilium cryptum JF-5            | 2.30E-005 | BamB  | YP_001235900.1 | Pyrrolo-quinoline quinone                                                                      |
| Acidiphilium cryptum JF-5            | 4.20E-019 | BamD  | YP_001233894.1 | DNA uptake lipoprotein-like protein                                                            |
| Acidiphilium cryptum JF-5            | 3.30E-009 | BamE  | YP_001233419.1 | SmpA/OmlA domain-containing protein                                                            |
| Acidiphilium cryptum JF-5            | 6.60E-006 | BamE  | YP_001234501.1 | hypothetical protein Acry_1371                                                                 |
| Acidiphilium cryptum JF-5            | 6.40E-005 | BamE  | YP_001235487.1 | hypothetical protein Acry_2374                                                                 |
| Acidiphilium cryptum JF-5            | 2.10E-115 | Omp85 | YP_001235556.1 | surface antigen (D15)                                                                          |
| Acidiphilium cryptum JF-5            | 5.80E-007 | Omp85 | YP_001233312.1 | surface antigen (D15)                                                                          |
| Acidiphilium multivorum AIU301       | 7.20E-022 | BamB  | YP_004283350.1 | pyrrolo-quinoline quinone                                                                      |
| Acidiphilium multivorum AIU301       | 1.50E-008 | BamB  | YP_004284015.1 | putative quinoprotein ethanol dehydrogenase                                                    |
| Acidiphilium multivorum AIU301       | 6.50E-007 | BamB  | YP_004283842.1 | putative pyrrolo-quinoline quinone                                                             |
| Acidiphilium multivorum AIU301       | 1.60E-006 | BamB  | YP_004285358.1 | alcohol dehydrogenase                                                                          |
| Acidiphilium multivorum AIU301       | 2.30E-005 | BamB  | YP_004285351.1 | PQQ-dependent dehydrogenase                                                                    |
| Acidiphilium multivorum AIU301       | 4.20E-019 | BamD  | YP_004283346.1 | putative lipoprotein                                                                           |
| Acidiphilium multivorum AIU301       | 3.30E-009 | BamE  | YP_004282529.1 | hypothetical protein ACMV_03000                                                                |
| Acidiphilium multivorum AIU301       | 5.00E-006 | BamE  | YP_004283647.1 | hypothetical protein ACMV_14180                                                                |
| Acidiphilium multivorum AIU301       | 6.40E-005 | BamE  | YP_004284929.1 | hypothetical protein ACMV_27000                                                                |
| Acidiphilium multivorum AIU301       | 3.80E-112 | Omp85 | YP_004284991.1 | hypothetical protein ACMV_27620                                                                |
| Acidiphilium multivorum AIU301       | 6.30E-007 | Omp85 | YP_004282419.1 | putative outer membrane protein                                                                |
| Agrobacterium radiobacter K84        | 4.10E-006 | BamB  | YP_002541776.1 | glucose dehydrogenase (pyrroloquinoline-quinone) protein                                       |
| Agrobacterium radiobacter K84        | 9.30E-006 | BamB  | YP_002540870.1 | Protein kinase: pyrrolo-quinoline quinone                                                      |
| Agrobacterium radiobacter K84        | 6.70E-005 | BamB  | YP_002540305.1 | glucose dehydrogenase (pyrroloquinoline-quinone) protein                                       |
| Agrobacterium radiobacter K84        | 7.20E-020 | BamD  | YP_002544968.1 | hypothetical protein Arad_2982                                                                 |
| Agrobacterium radiobacter K84        | 2.00E-030 | BamE  | YP_002544048.1 | hypothetical protein Arad_1765                                                                 |
| Agrobacterium radiobacter K84        | 4.00E-005 | BamE  | YP_002543299.1 | glycine betaine ABC transporter                                                                |

## alpha\_e-5

|                                     |           |       |                |                                                       |
|-------------------------------------|-----------|-------|----------------|-------------------------------------------------------|
| Agrobacterium radiobacter K84       | 1.30E-107 | Omp85 | YP_002544395.1 | outer membrane lipoprotein                            |
| Agrobacterium radiobacter K84       | 8.60E-007 | Omp85 | YP_002545946.1 | outer membrane protein                                |
| Agrobacterium sp. H13-3             | 2.30E-005 | BamB  | YP_004444323.1 | Glucose dehydrogenase                                 |
| Agrobacterium sp. H13-3             | 4.40E-021 | BamD  | YP_004279319.1 | lipoprotein                                           |
| Agrobacterium sp. H13-3             | 3.30E-030 | BamE  | YP_004278413.1 | hypothetical protein AGROH133_05409                   |
| Agrobacterium sp. H13-3             | 2.70E-117 | Omp85 | YP_004278608.1 | group 1 outer membrane protein precursor              |
| Agrobacterium sp. H13-3             | 8.00E-007 | Omp85 | YP_004279849.1 | Outer membrane protein                                |
| Agrobacterium tumefaciens str. C58  | 2.20E-005 | BamB  | NP_356512.1    | glucose dehydrogenase                                 |
| Agrobacterium tumefaciens str. C58  | 1.60E-020 | BamD  | NP_355049.2    | hypothetical protein Atu2084                          |
| Agrobacterium tumefaciens str. C58  | 1.40E-030 | BamE  | NP_354193.2    | hypothetical protein Atu1175                          |
| Agrobacterium tumefaciens str. C58  | 8.60E-117 | Omp85 | NP_354388.1    | hypothetical protein Atu1381                          |
| Agrobacterium tumefaciens str. C58  | 7.20E-007 | Omp85 | NP_355552.1    | hypothetical protein Atu2615                          |
| Agrobacterium vitis S4              | 9.40E-006 | BamB  | YP_002550056.1 | glucose dehydrogenase                                 |
| Agrobacterium vitis S4              | 1.40E-022 | BamD  | YP_002550084.1 | hypothetical protein Avi_2880                         |
| Agrobacterium vitis S4              | 1.00E-031 | BamE  | YP_002549169.1 | hypothetical protein Avi_1624                         |
| Agrobacterium vitis S4              | 3.00E-124 | Omp85 | YP_002549812.1 | group 1 outer membrane protein precursor              |
| Agrobacterium vitis S4              | 7.10E-007 | Omp85 | YP_002550968.1 | hypothetical protein Avi_4088                         |
| Anaplasma centrale str. Israel      | 3.90E-010 | BamB  | YP_003328463.1 | hypothetical protein ACIS_00541                       |
| Anaplasma centrale str. Israel      | 5.70E-016 | BamD  | YP_003328305.1 | DNA uptake lipoprotein ComL                           |
| Anaplasma centrale str. Israel      | 3.10E-006 | BamE  | YP_003328540.1 | hypothetical protein ACIS_00646                       |
| Anaplasma centrale str. Israel      | 1.20E-054 | Omp85 | YP_003328252.1 | hypothetical protein ACIS_00268                       |
| Anaplasma marginale str. Florida    | 1.90E-010 | BamB  | YP_002563693.1 | hypothetical protein AMF_592                          |
| Anaplasma marginale str. Florida    | 2.30E-015 | BamD  | YP_002563857.1 | hypothetical protein AMF_769                          |
| Anaplasma marginale str. Florida    | 2.80E-006 | BamE  | YP_002563605.1 | hypothetical protein AMF_493                          |
| Anaplasma marginale str. Florida    | 2.90E-060 | Omp85 | YP_002563915.1 | outer membrane protein                                |
| Anaplasma marginale str. St. Maries | 1.90E-010 | BamB  | YP_153984.1    | hypothetical protein AM798                            |
| Anaplasma marginale str. St. Maries | 2.30E-015 | BamD  | YP_154148.1    | hypothetical protein AM1010                           |
| Anaplasma marginale str. St. Maries | 9.00E-060 | Omp85 | YP_154207.1    | outer membrane protein                                |
| Anaplasma phagocytophilum HZ        | 1.20E-011 | BamB  | YP_504997.1    | PQQ repeat-containing protein                         |
| Anaplasma phagocytophilum HZ        | 1.00E-014 | BamD  | YP_505635.1    | putative competence lipoprotein ComL                  |
| Anaplasma phagocytophilum HZ        | 8.00E-055 | Omp85 | YP_505741.1    | OMP85 family outer membrane protein                   |
| Asticcacaulis excentricus CB 48     | 1.60E-117 | BamB  | YP_004088487.1 | pyrrolo-quinoline quinone beta-propeller repeat       |
| Asticcacaulis excentricus CB 48     | 8.60E-020 | BamD  | YP_004087487.1 | outer membrane assembly lipoprotein yfio              |
| Asticcacaulis excentricus CB 48     | 2.00E-018 | BamE  | YP_004088721.1 | smpa/omla domain-containing protein                   |
| Asticcacaulis excentricus CB 48     | 2.70E-007 | Omp85 | YP_004087507.1 | surface antigen (d15)                                 |
| Asticcacaulis excentricus CB 48     | 7.80E-124 | Omp85 | YP_004088640.1 | outer membrane protein assembly complex, yaet protein |
| Azorhizobium caulinodans ORS 571    | 6.70E-018 | BamD  | YP_001527483.1 | lipoprotein precursor                                 |
| Azorhizobium caulinodans ORS 571    | 1.30E-026 | BamE  | YP_001525214.1 | SmpA protein                                          |
| Azorhizobium caulinodans ORS 571    | 1.00E-143 | Omp85 | YP_001524617.1 | outer membrane protein precursor                      |
| Azorhizobium caulinodans ORS 571    | 5.80E-006 | Omp85 | YP_001523673.1 | hypothetical protein AZC_0757                         |

## alpha\_e-5

|                                             |           |       |                |                                                       |
|---------------------------------------------|-----------|-------|----------------|-------------------------------------------------------|
| Azospirillum sp. B510                       | 2.20E-080 | BamB  | YP_003448892.1 | pyrrolo-quinoline quinone                             |
| Azospirillum sp. B510                       | 1.10E-007 | BamB  | YP_003450601.1 | alcohol dehydrogenase (acceptor)                      |
| Azospirillum sp. B510                       | 7.60E-008 | BamB  | YP_003451663.1 | alcohol dehydrogenase (acceptor)                      |
| Azospirillum sp. B510                       | 2.00E-006 | BamB  | YP_003453045.1 | quinoprotein glucose dehydrogenase                    |
| Azospirillum sp. B510                       | 6.40E-033 | BamD  | YP_003449141.1 | lipoprotein                                           |
| Azospirillum sp. B510                       | 5.50E-038 | BamE  | YP_003448201.1 | SmpA/OmlA domain-containing protein                   |
| Azospirillum sp. B510                       | 5.40E-147 | Omp85 | YP_003448800.1 | outer membrane protein                                |
| Azospirillum sp. B510                       | 1.10E-007 | Omp85 | YP_003448434.1 | surface antigen                                       |
| Bartonella bacilliformis KC583              | 2.00E-017 | BamD  | YP_989220.1    | putative lipoprotein                                  |
| Bartonella bacilliformis KC583              | 3.50E-017 | BamE  | YP_988939.1    | SmpA/OmlA family outer membrane protein               |
| Bartonella bacilliformis KC583              | 5.40E-107 | Omp85 | YP_988897.1    | OMP85 family outer membrane protein                   |
| Bartonella bacilliformis KC583              | 4.00E-006 | Omp85 | YP_989591.1    | OMP85 family outer membrane protein                   |
| Bartonella clarridgeiae 73                  | 4.10E-018 | BamD  | YP_004159242.1 | competence lipoprotein precursor                      |
| Bartonella clarridgeiae 73                  | 9.00E-028 | BamE  | YP_004159081.1 | Small protein A                                       |
| Bartonella clarridgeiae 73                  | 1.20E-107 | Omp85 | YP_004159130.1 | outer membrane protein                                |
| Bartonella clarridgeiae 73                  | 2.10E-005 | Omp85 | YP_004158328.1 | hypothetical protein BARCL_0049                       |
| Bartonella grahamii as4aup                  | 6.90E-019 | BamD  | YP_002972284.1 | competence lipoprotein ComL precursor                 |
| Bartonella grahamii as4aup                  | 1.50E-032 | BamE  | YP_002972086.1 | small protein A, outer membrane lipoprotein           |
| Bartonella grahamii as4aup                  | 8.00E-104 | Omp85 | YP_002971703.1 | outer membrane protein                                |
| Bartonella grahamii as4aup                  | 8.00E-006 | Omp85 | YP_002971110.1 | putative outer membrane protein                       |
| Bartonella henselae str. Houston-1          | 1.10E-017 | BamD  | YP_033888.1    | competence lipoprotein comL precursor                 |
| Bartonella henselae str. Houston-1          | 5.10E-033 | BamE  | YP_033572.1    | hypothetical protein BH07600                          |
| Bartonella henselae str. Houston-1          | 5.40E-113 | Omp85 | YP_033457.1    | Outer membrane protein                                |
| Bartonella henselae str. Houston-1          | 4.40E-006 | Omp85 | YP_032911.1    | hypothetical protein BH00450                          |
| Bartonella quintana str. Toulouse           | 1.80E-018 | BamD  | YP_032490.1    | competence lipoprotein comL precursor                 |
| Bartonella quintana str. Toulouse           | 5.70E-031 | BamE  | YP_032207.1    | hypothetical protein BQ05450                          |
| Bartonella quintana str. Toulouse           | 1.40E-105 | Omp85 | YP_032332.1    | Outer membrane protein                                |
| Bartonella quintana str. Toulouse           | 2.90E-006 | Omp85 | YP_031766.1    | hypothetical protein BQ00400                          |
| Bartonella tribocorum CIP 105476            | 2.00E-018 | BamD  | YP_001609917.1 | competence lipoprotein precursor                      |
| Bartonella tribocorum CIP 105476            | 4.60E-031 | BamE  | YP_001609671.1 | small protein A                                       |
| Bartonella tribocorum CIP 105476            | 2.00E-103 | Omp85 | YP_001609311.1 | outer membrane protein                                |
| Bartonella tribocorum CIP 105476            | 5.70E-006 | Omp85 | YP_001608542.1 | putative outer membrane protein                       |
| Beijerinckia indica subsp. indica ATCC 9039 | 6.40E-007 | BamB  | YP_001832332.1 | Pyrrrolo-quinoline quinone                            |
| Beijerinckia indica subsp. indica ATCC 9039 | 9.50E-007 | BamB  | YP_001832102.1 | Pyrrrolo-quinoline quinone                            |
| Beijerinckia indica subsp. indica ATCC 9039 | 2.20E-006 | BamB  | YP_001834680.1 | methanol/ethanol family PQQ-dependent dehydrogenase   |
| Beijerinckia indica subsp. indica ATCC 9039 | 2.00E-020 | BamD  | YP_001831838.1 | DNA uptake lipoprotein-like protein                   |
| Beijerinckia indica subsp. indica ATCC 9039 | 2.50E-018 | BamE  | YP_001834429.1 | SmpA/OmlA domain-containing protein                   |
| Beijerinckia indica subsp. indica ATCC 9039 | 7.50E-133 | Omp85 | YP_001831438.1 | outer membrane protein assembly complex, YaeT protein |
| Beijerinckia indica subsp. indica ATCC 9039 | 4.10E-006 | Omp85 | YP_001832835.1 | surface antigen (D15)                                 |
| Bradyrhizobium japonicum USDA 110           | 8.80E-008 | BamB  | NP_772860.1    | alcohol dehydrogenase                                 |

## alpha\_e-5

|                                        |           |       |                |                                                         |
|----------------------------------------|-----------|-------|----------------|---------------------------------------------------------|
| Bradyrhizobium japonicum USDA 110      | 1.10E-007 | BamB  | NP_766973.1    | alcohol dehydrogenase                                   |
| Bradyrhizobium japonicum USDA 110      | 1.10E-007 | BamB  | NP_772847.1    | quinoprotein ethanol dehydrogenase                      |
| Bradyrhizobium japonicum USDA 110      | 1.60E-007 | BamB  | NP_774279.1    | alcohol dehydrogenase                                   |
| Bradyrhizobium japonicum USDA 110      | 2.70E-006 | BamB  | NP_772144.1    | polyvinyl-alcohol dehydrogenase                         |
| Bradyrhizobium japonicum USDA 110      | 5.10E-005 | BamB  | NP_772853.1    | methanol dehydrogenase large subunit-like protein       |
| Bradyrhizobium japonicum USDA 110      | 2.00E-017 | BamD  | NP_773234.1    | hypothetical protein bll6594                            |
| Bradyrhizobium japonicum USDA 110      | 2.00E-023 | BamE  | NP_771664.1    | hypothetical protein blr5024                            |
| Bradyrhizobium japonicum USDA 110      | 9.40E-113 | Omp85 | NP_770352.1    | outer membrane protein                                  |
| Bradyrhizobium japonicum USDA 110      | 4.30E-104 | Omp85 | NP_771493.1    | outer membrane protein                                  |
| Bradyrhizobium sp. BTAi1               | 1.60E-007 | BamB  | YP_001238404.1 | putative quinoprotein                                   |
| Bradyrhizobium sp. BTAi1               | 1.90E-007 | BamB  | YP_001241809.1 | putative quinoprotein ethanol dehydrogenase             |
| Bradyrhizobium sp. BTAi1               | 4.90E-007 | BamB  | YP_001241369.1 | putative alcohol dehydrogenase                          |
| Bradyrhizobium sp. BTAi1               | 1.30E-006 | BamB  | YP_001239913.1 | putative alcohol dehydrogenase                          |
| Bradyrhizobium sp. BTAi1               | 1.60E-006 | BamB  | YP_001238114.1 | putative quinoprotein ethanol dehydrogenase             |
| Bradyrhizobium sp. BTAi1               | 5.20E-006 | BamB  | YP_001241813.1 | methanol dehydrogenase large subunit                    |
| Bradyrhizobium sp. BTAi1               | 2.30E-005 | BamB  | YP_001243334.1 | quinoprotein glucose dehydrogenase                      |
| Bradyrhizobium sp. BTAi1               | 3.70E-019 | BamD  | YP_001241994.1 | hypothetical protein BBta_6164                          |
| Bradyrhizobium sp. BTAi1               | 5.10E-020 | BamE  | YP_001240569.1 | small protein A domain-containing protein               |
| Bradyrhizobium sp. BTAi1               | 4.80E-106 | Omp85 | YP_001240447.1 | surface antigen domain-containing protein               |
| Bradyrhizobium sp. BTAi1               | 2.00E-103 | Omp85 | YP_001236335.1 | hypothetical protein BBta_0131                          |
| Bradyrhizobium sp. BTAi1               | 2.70E-087 | Omp85 | YP_001241677.1 | putative protective surface antigen                     |
| Bradyrhizobium sp. ORS 278             | 1.20E-007 | BamB  | YP_001202344.1 | quinoprotein ethanol dehydrogenase                      |
| Bradyrhizobium sp. ORS 278             | 1.20E-007 | BamB  | YP_001207373.1 | quinoprotein ethanol dehydrogenase                      |
| Bradyrhizobium sp. ORS 278             | 1.60E-007 | BamB  | YP_001203590.1 | quinoprotein ethanol dehydrogenase                      |
| Bradyrhizobium sp. ORS 278             | 2.20E-006 | BamB  | YP_001203821.1 | quinoprotein ethanol dehydrogenase                      |
| Bradyrhizobium sp. ORS 278             | 3.40E-006 | BamB  | YP_001207377.1 | methanol dehydrogenase large subunit-like protein       |
| Bradyrhizobium sp. ORS 278             | 4.10E-006 | BamB  | YP_001205882.1 | alcohol dehydrogenase (acceptor)                        |
| Bradyrhizobium sp. ORS 278             | 6.20E-005 | BamB  | YP_001202777.1 | quinoprotein glucose dehydrogenase                      |
| Bradyrhizobium sp. ORS 278             | 3.10E-019 | BamD  | YP_001207538.1 | TPR repeat-containing protein                           |
| Bradyrhizobium sp. ORS 278             | 1.50E-020 | BamE  | YP_001206385.1 | hypothetical protein BRADO4421                          |
| Bradyrhizobium sp. ORS 278             | 2.50E-104 | Omp85 | YP_001206109.1 | hypothetical protein BRADO4132                          |
| Bradyrhizobium sp. ORS 278             | 2.60E-100 | Omp85 | YP_001202441.1 | outer membrane protein                                  |
| Bradyrhizobium sp. ORS 278             | 1.80E-081 | Omp85 | YP_001207233.1 | protective surface antigen                              |
| Brevundimonas subvibrioides ATCC 15264 | 1.30E-106 | BamB  | YP_003819467.1 | pyrrolo-quinoline quinone beta-propeller repeat protein |
| Brevundimonas subvibrioides ATCC 15264 | 2.60E-019 | BamD  | YP_003819592.1 | outer membrane assembly lipoprotein YfiO                |
| Brevundimonas subvibrioides ATCC 15264 | 2.10E-030 | BamE  | YP_003818827.1 | SmpA/OmlA domain-containing protein                     |
| Brevundimonas subvibrioides ATCC 15264 | 2.10E-136 | Omp85 | YP_003819423.1 | outer membrane protein assembly complex, YaeT protein   |
| Brevundimonas subvibrioides ATCC 15264 | 3.70E-005 | Omp85 | YP_003818283.1 | surface antigen (D15)                                   |
| Brucella abortus bv. 1 str. 9-941      | 2.60E-025 | BamD  | YP_222108.1    | competence protein ComL                                 |
| Brucella abortus bv. 1 str. 9-941      | 3.70E-059 | BamE  | YP_221517.1    | hypothetical protein BruAb1_0788                        |



## alpha\_e-5

|                                              |           |       |                |                                                       |
|----------------------------------------------|-----------|-------|----------------|-------------------------------------------------------|
| Brucella abortus bv. 1 str. 9-941            | 2.60E-118 | Omp85 | YP_221860.1    | surface antigen                                       |
| Brucella abortus bv. 1 str. 9-941            | 4.90E-006 | Omp85 | YP_220827.1    | hypothetical protein BruAb1_0048                      |
| Brucella abortus S19                         | 2.60E-025 | BamD  | YP_001935317.1 | TPR repeat-containing protein                         |
| Brucella abortus S19                         | 3.70E-059 | BamE  | YP_001934741.1 | SmpA/OmlA                                             |
| Brucella abortus S19                         | 2.60E-118 | Omp85 | YP_001935075.1 | surface antigen                                       |
| Brucella abortus S19                         | 4.40E-006 | Omp85 | YP_001934077.1 | surface antigen                                       |
| Brucella canis ATCC 23365                    | 2.60E-025 | BamD  | YP_001593257.1 | hypothetical protein BCAN_A1455                       |
| Brucella canis ATCC 23365                    | 1.20E-060 | BamE  | YP_001592626.1 | SmpA/OmlA domain-containing protein                   |
| Brucella canis ATCC 23365                    | 2.30E-118 | Omp85 | YP_001592993.1 | Outer membrane protein assembly factor yaeT precursor |
| Brucella canis ATCC 23365                    | 4.80E-006 | Omp85 | YP_001591924.1 | surface antigen (D15)                                 |
| Brucella melitensis ATCC 23457               | 2.60E-025 | BamD  | YP_002733137.1 | outer membrane assembly lipoprotein YfiO              |
| Brucella melitensis ATCC 23457               | 1.20E-060 | BamE  | YP_002732521.1 | SmpA/OmlA domain-containing protein                   |
| Brucella melitensis ATCC 23457               | 8.70E-118 | Omp85 | YP_002732885.1 | outer membrane protein assembly complex protein YaeT  |
| Brucella melitensis ATCC 23457               | 4.90E-006 | Omp85 | YP_002731823.1 | surface antigen D15                                   |
| Brucella melitensis biovar Abortus 2308      | 2.60E-025 | BamD  | YP_414813.1    | TPR repeat-containing protein                         |
| Brucella melitensis biovar Abortus 2308      | 3.70E-059 | BamE  | YP_414227.1    | SmpA/OmlA                                             |
| Brucella melitensis biovar Abortus 2308      | 2.60E-118 | Omp85 | YP_414567.1    | surface antigen                                       |
| Brucella melitensis biovar Abortus 2308      | 4.90E-006 | Omp85 | YP_413545.1    | surface antigen                                       |
| Brucella melitensis bv. 1 str. 16M           | 2.60E-025 | BamD  | NP_539504.1    | COML, competence lipoprotein                          |
| Brucella melitensis bv. 1 str. 16M           | 1.20E-060 | BamE  | NP_540101.1    | small protein A                                       |
| Brucella melitensis bv. 1 str. 16M           | 8.70E-118 | Omp85 | NP_539747.1    | outer membrane protein                                |
| Brucella melitensis bv. 1 str. 16M           | 1.20E-005 | Omp85 | NP_540812.1    | outer membrane protein                                |
| Brucella microti CCM 4915                    | 2.60E-025 | BamD  | YP_003107349.1 | competence protein ComL                               |
| Brucella microti CCM 4915                    | 1.20E-060 | BamE  | YP_003106712.1 | SmpA/OmlA domain-containing protein                   |
| Brucella microti CCM 4915                    | 2.30E-118 | Omp85 | YP_003107089.1 | surface antigen                                       |
| Brucella microti CCM 4915                    | 5.00E-006 | Omp85 | YP_003106020.1 | surface antigen                                       |
| Brucella ovis ATCC 25840                     | 1.70E-025 | BamD  | YP_001259314.1 | putative competence protein ComL                      |
| Brucella ovis ATCC 25840                     | 1.30E-060 | BamE  | YP_001258751.1 | hypothetical protein BOV_0765                         |
| Brucella ovis ATCC 25840                     | 3.30E-123 | Omp85 | YP_001259073.1 | outer membrane protein assembly complex protein YaeT  |
| Brucella ovis ATCC 25840                     | 4.20E-006 | Omp85 | YP_001258093.1 | hypothetical protein BOV_0047                         |
| Brucella suis 1330                           | 2.60E-025 | BamD  | NP_698420.1    | competence protein ComL                               |
| Brucella suis 1330                           | 1.20E-060 | BamE  | NP_697786.1    | hypothetical protein BR0772                           |
| Brucella suis 1330                           | 9.10E-118 | Omp85 | NP_698159.1    | surface antigen                                       |
| Brucella suis 1330                           | 4.90E-006 | Omp85 | NP_697090.1    | hypothetical protein BR0048                           |
| Brucella suis ATCC 23445                     | 2.60E-025 | BamD  | YP_001628081.1 | hypothetical protein BSUIS_A1473                      |
| Brucella suis ATCC 23445                     | 1.20E-060 | BamE  | YP_001627447.1 | SmpA/OmlA domain-containing protein                   |
| Brucella suis ATCC 23445                     | 7.30E-118 | Omp85 | YP_001627823.1 | Outer membrane protein assembly factor yaeT precursor |
| Brucella suis ATCC 23445                     | 5.60E-006 | Omp85 | YP_001626728.1 | surface antigen (D15)                                 |
| Candidatus Liberibacter asiaticus str. psy62 | 1.90E-015 | BamD  | YP_003065587.1 | outer membrane assembly lipoprotein YfiO              |
| Candidatus Liberibacter asiaticus str. psy62 | 3.20E-007 | BamE  | YP_003064913.1 | hypothetical protein CLIBASIA_01935                   |

## alpha\_e-5

|                                               |           |       |                |                                                       |
|-----------------------------------------------|-----------|-------|----------------|-------------------------------------------------------|
| Candidatus Liberibacter asiaticus str. psy62  | 2.50E-062 | Omp85 | YP_003065185.1 | surface antigen (D15)                                 |
| Candidatus Liberibacter solanacearum CLso-ZC1 | 4.10E-017 | BamD  | YP_004063058.1 | outer membrane assembly lipoprotein YfiO              |
| Candidatus Liberibacter solanacearum CLso-ZC1 | 1.00E-008 | BamE  | YP_004062802.1 | hypothetical protein CKC_02825                        |
| Candidatus Liberibacter solanacearum CLso-ZC1 | 5.90E-021 | Omp85 | YP_004062478.1 | surface antigen (D15)                                 |
| Candidatus Midichloria mitochondrii IricVA    | 6.20E-013 | BamB  | YP_004680139.1 | PQQ enzyme repeat family protein                      |
| Candidatus Midichloria mitochondrii IricVA    | 1.60E-018 | BamD  | YP_004679950.1 | competence lipoprotein ComL                           |
| Candidatus Midichloria mitochondrii IricVA    | 1.20E-008 | BamE  | YP_004679823.1 | hypothetical protein midi_00849                       |
| Candidatus Midichloria mitochondrii IricVA    | 1.50E-010 | Omp85 | YP_004679182.1 | surface antigen                                       |
| Candidatus Pelagibacter sp. IMCC9063          | 1.60E-007 | BamB  | YP_004358135.1 | PQQ enzyme repeat family protein                      |
| Candidatus Pelagibacter sp. IMCC9063          | 8.90E-015 | BamD  | YP_004357981.1 | putative competence lipoprotein ComL                  |
| Candidatus Pelagibacter sp. IMCC9063          | 7.60E-011 | Omp85 | YP_004358253.1 | outer membrane protein assembly factor YaeT precursor |
| Candidatus Pelagibacter ubique HTCC1062       | 4.00E-009 | BamB  | YP_266730.1    | PQQ repeat-containing protein                         |
| Candidatus Pelagibacter ubique HTCC1062       | 1.10E-014 | BamD  | YP_265445.1    | competence lipoprotein ComL                           |
| Candidatus Pelagibacter ubique HTCC1062       | 3.50E-009 | BamE  | YP_266449.1    | hypothetical protein SAR11_1039                       |
| Candidatus Pelagibacter ubique HTCC1062       | 4.80E-011 | Omp85 | YP_266329.1    | outer membrane protein omp1                           |
| Candidatus Puniceispirillum marinum IMCC1322  | 3.00E-033 | BamB  | YP_003552827.1 | pyrrolo-quinoline quinone                             |
| Candidatus Puniceispirillum marinum IMCC1322  | 8.70E-027 | BamD  | YP_003552653.1 | competence lipoprotein ComL                           |
| Candidatus Puniceispirillum marinum IMCC1322  | 1.70E-009 | BamE  | YP_003550495.1 | SmpA/OmlA                                             |
| Candidatus Puniceispirillum marinum IMCC1322  | 4.20E-108 | Omp85 | YP_003550838.1 | surface antigen D15                                   |
| Caulobacter crescentus CB15                   | 3.20E-291 | BamB  | NP_420463.1    | PQQ repeat-containing protein                         |
| Caulobacter crescentus CB15                   | 2.80E-020 | BamD  | NP_420791.1    | competence lipoprotein ComL                           |
| Caulobacter crescentus CB15                   | 1.20E-052 | BamE  | NP_420178.1    | hypothetical protein CC_1365                          |
| Caulobacter crescentus CB15                   | 2.80E-138 | Omp85 | NP_420722.1    | outer membrane protein                                |
| Caulobacter crescentus CB15                   | 9.60E-006 | Omp85 | NP_420414.1    | hypothetical protein CC_1603                          |
| Caulobacter crescentus NA1000                 | 3.20E-291 | BamB  | YP_002517098.1 | PQQ enzyme repeat family protein                      |
| Caulobacter crescentus NA1000                 | 2.80E-020 | BamD  | YP_002517436.1 | ComL family lipoprotein                               |
| Caulobacter crescentus NA1000                 | 3.80E-052 | BamE  | YP_002516800.1 | SmpA/OmlA family lipoprotein                          |
| Caulobacter crescentus NA1000                 | 9.10E-144 | Omp85 | YP_002517365.1 | outer membrane protein assembly factor                |
| Caulobacter crescentus NA1000                 | 1.70E-005 | Omp85 | YP_002517048.1 | outer membrane protein                                |
| Caulobacter segnis ATCC 21756                 | 1.80E-251 | BamB  | YP_003593401.1 | PQQ enzyme repeat family protein                      |
| Caulobacter segnis ATCC 21756                 | 1.50E-022 | BamD  | YP_003592551.1 | outer membrane assembly lipoprotein YfiO              |
| Caulobacter segnis ATCC 21756                 | 1.70E-047 | BamE  | YP_003592768.1 | SmpA/OmlA domain-containing protein                   |
| Caulobacter segnis ATCC 21756                 | 1.90E-144 | Omp85 | YP_003593283.1 | outer membrane protein assembly complex YaeT protein  |
| Caulobacter segnis ATCC 21756                 | 2.10E-005 | Omp85 | YP_003593674.1 | surface antigen (D15)                                 |
| Caulobacter sp. K31                           | 4.90E-211 | BamB  | YP_001684122.1 | Pyrrrolo-quinoline quinone                            |
| Caulobacter sp. K31                           | 2.50E-019 | BamD  | YP_001684725.1 | outer membrane assembly lipoprotein YfiO              |
| Caulobacter sp. K31                           | 8.80E-040 | BamE  | YP_001684662.1 | SmpA/OmlA domain-containing protein                   |
| Caulobacter sp. K31                           | 6.10E-132 | Omp85 | YP_001684422.1 | outer membrane protein assembly complex, YaeT protein |
| Caulobacter sp. K31                           | 6.50E-006 | Omp85 | YP_001683825.1 | surface antigen (D15)                                 |
| Dinoroseobacter shibae DFL 12                 | 4.30E-016 | BamB  | YP_001532508.1 | pyrrolo-quinoline quinone                             |

## alpha\_e-5

|                                        |           |       |                |                                                                                                                                           |
|----------------------------------------|-----------|-------|----------------|-------------------------------------------------------------------------------------------------------------------------------------------|
| Dinoroseobacter shibae DFL 12          | 2.50E-008 | BamB  | YP_001534007.1 | quinoprotein ethanol dehydrogenase                                                                                                        |
| Dinoroseobacter shibae DFL 12          | 4.90E-005 | BamB  | YP_001531825.1 | quinoprotein glucose dehydrogenase                                                                                                        |
| Dinoroseobacter shibae DFL 12          | 1.60E-019 | BamD  | YP_001533749.1 | hypothetical protein Dshi_2414                                                                                                            |
| Dinoroseobacter shibae DFL 12          | 3.80E-010 | BamE  | YP_001533059.1 | hypothetical protein Dshi_1716                                                                                                            |
| Dinoroseobacter shibae DFL 12          | 3.90E-148 | Omp85 | YP_001532842.1 | hypothetical protein Dshi_1499                                                                                                            |
| Ehrlichia canis str. Jake              | 7.00E-012 | BamB  | YP_303156.1    | quino protein                                                                                                                             |
| Ehrlichia canis str. Jake              | 9.80E-019 | BamD  | YP_303441.1    | hypothetical protein Ecaj_0812                                                                                                            |
| Ehrlichia canis str. Jake              | 9.30E-009 | BamE  | YP_303055.1    | hypothetical protein Ecaj_0414                                                                                                            |
| Ehrlichia canis str. Jake              | 3.80E-049 | Omp85 | YP_303492.1    | surface antigen (D15):surface antigen variable number                                                                                     |
| Ehrlichia chaffeensis str. Arkansas    | 1.30E-010 | BamB  | YP_507323.1    | PQQ repeat-containing protein                                                                                                             |
| Ehrlichia chaffeensis str. Arkansas    | 3.70E-018 | BamD  | YP_507792.1    | putative competence protein ComL                                                                                                          |
| Ehrlichia chaffeensis str. Arkansas    | 2.40E-008 | BamE  | YP_507435.1    | putative lipoprotein                                                                                                                      |
| Ehrlichia chaffeensis str. Arkansas    | 4.50E-056 | Omp85 | YP_507856.1    | OMP85 family outer membrane protein                                                                                                       |
| Ehrlichia ruminantium str. Gardel      | 2.00E-011 | BamB  | YP_196455.1    | hypothetical protein ERGA_CDS_05290                                                                                                       |
| Ehrlichia ruminantium str. Gardel      | 4.80E-017 | BamD  | YP_196736.1    | hypothetical protein ERGA_CDS_08100                                                                                                       |
| Ehrlichia ruminantium str. Gardel      | 9.30E-010 | BamE  | YP_196360.1    | hypothetical protein ERGA_CDS_04340                                                                                                       |
| Ehrlichia ruminantium str. Gardel      | 5.20E-051 | Omp85 | YP_196792.1    | Outer membrane protein omp1                                                                                                               |
| Ehrlichia ruminantium str. Welgevonden | 1.30E-011 | BamB  | YP_180377.1    | hypothetical protein Erum5140                                                                                                             |
| Ehrlichia ruminantium str. Welgevonden | 1.30E-011 | BamB  | YP_197415.1    | hypothetical protein ERWE_CDS_05390                                                                                                       |
| Ehrlichia ruminantium str. Welgevonden | 3.30E-017 | BamD  | YP_180639.1    | hypothetical protein Erum7760                                                                                                             |
| Ehrlichia ruminantium str. Welgevonden | 3.30E-017 | BamD  | YP_197696.1    | hypothetical protein ERWE_CDS_08200                                                                                                       |
| Ehrlichia ruminantium str. Welgevonden | 9.30E-010 | BamE  | YP_180289.1    | hypothetical protein Erum4230                                                                                                             |
| Ehrlichia ruminantium str. Welgevonden | 9.30E-010 | BamE  | YP_197316.1    | hypothetical protein ERWE_CDS_04400                                                                                                       |
| Ehrlichia ruminantium str. Welgevonden | 3.80E-051 | Omp85 | YP_180689.1    | Outer membrane protein omp1                                                                                                               |
| Ehrlichia ruminantium str. Welgevonden | 3.80E-051 | Omp85 | YP_197751.1    | Outer membrane protein omp1                                                                                                               |
| Erythrobacter litoralis HTCC2594       | 8.30E-053 | BamB  | YP_457468.1    | hypothetical protein ELI_02895                                                                                                            |
| Erythrobacter litoralis HTCC2594       | 9.80E-009 | BamB  | YP_459803.1    | alcohol dehydrogenase large subunit                                                                                                       |
| Erythrobacter litoralis HTCC2594       | 2.40E-018 | BamD  | YP_458335.1    | DNA uptake lipoprotein                                                                                                                    |
| Erythrobacter litoralis HTCC2594       | 7.90E-010 | BamE  | YP_456931.1    | tmRNA-binding small protein A                                                                                                             |
| Erythrobacter litoralis HTCC2594       | 8.90E-118 | Omp85 | YP_457652.1    | outer membrane protein                                                                                                                    |
| Erythrobacter litoralis HTCC2594       | 1.80E-007 | Omp85 | YP_457217.1    | hypothetical protein ELI_01640                                                                                                            |
| Gluconacetobacter diazotrophicus PAI 5 | 2.20E-026 | BamB  | YP_002277450.1 | Pyrrolo-quinoline quinone                                                                                                                 |
| Gluconacetobacter diazotrophicus PAI 5 | 6.60E-007 | BamB  | YP_002274674.1 | PQQ-dependent dehydrogenase, methanol/ethanol family<br>membrane-bound PQQ-dependent dehydrogenase,<br>glucose/quininate/shikimate family |
| Gluconacetobacter diazotrophicus PAI 5 | 2.90E-005 | BamB  | YP_002277434.1 | Pyrrolo-quinoline quinone                                                                                                                 |
| Gluconacetobacter diazotrophicus PAI 5 | 1.70E-026 | BamB  | YP_001603491.1 | Pyrrolo-quinoline quinone                                                                                                                 |
| Gluconacetobacter diazotrophicus PAI 5 | 6.60E-007 | BamB  | YP_001602285.1 | alcohol dehydrogenase                                                                                                                     |
| Gluconacetobacter diazotrophicus PAI 5 | 2.90E-005 | BamB  | YP_001603508.1 | quinoprotein glucose dehydrogenase                                                                                                        |
| Gluconacetobacter diazotrophicus PAI 5 | 1.60E-019 | BamD  | YP_002277507.1 | outer membrane assembly lipoprotein YfiO                                                                                                  |
| Gluconacetobacter diazotrophicus PAI 5 | 1.50E-019 | BamD  | YP_001603429.1 | hypothetical protein GDI_3198                                                                                                             |
| Gluconacetobacter diazotrophicus PAI 5 | 1.90E-016 | BamE  | YP_002277631.1 | SmpA/OmlA domain-containing protein                                                                                                       |

## alpha\_e-5

|                                         |           |       |                |                                                       |
|-----------------------------------------|-----------|-------|----------------|-------------------------------------------------------|
| Gluconacetobacter diazotrophicus PAI 5  | 1.90E-016 | BamE  | YP_001603310.1 | SmpA/OmlA family lipoprotein                          |
| Gluconacetobacter diazotrophicus PAI 5  | 3.10E-101 | Omp85 | YP_002274776.1 | outer membrane protein assembly complex, YaeT protein |
| Gluconacetobacter diazotrophicus PAI 5  | 1.10E-005 | Omp85 | YP_002274488.1 | surface antigen (D15)                                 |
| Gluconacetobacter diazotrophicus PAI 5  | 1.50E-088 | Omp85 | YP_001602390.1 | outer membrane protein assembly factor yaeT           |
| Gluconacetobacter diazotrophicus PAI 5  | 3.00E-006 | Omp85 | YP_001602089.1 | surface antigen                                       |
| Gluconobacter oxydans 621H              | 6.10E-027 | BamB  | YP_192361.1    | PQQ-containing dehydrogenase 2                        |
| Gluconobacter oxydans 621H              | 3.60E-007 | BamB  | YP_191493.1    | alcohol dehydrogenase large subunit                   |
| Gluconobacter oxydans 621H              | 5.50E-005 | BamB  | YP_192251.1    | PQQ-containing dehydrogenase 1                        |
| Gluconobacter oxydans 621H              | 7.70E-019 | BamD  | YP_190615.1    | lipoprotein                                           |
| Gluconobacter oxydans 621H              | 1.40E-017 | BamE  | YP_190569.1    | hypothetical protein GOX0119                          |
| Gluconobacter oxydans 621H              | 1.30E-093 | Omp85 | YP_192213.1    | Outer membrane protein                                |
| Gluconobacter oxydans 621H              | 8.30E-007 | Omp85 | YP_192403.1    | Outer membrane protein                                |
| Granulibacter bethesdensis CGDNIH1      | 3.00E-045 | BamB  | YP_746115.1    | PQQ repeat-containing protein                         |
| Granulibacter bethesdensis CGDNIH1      | 2.10E-006 | BamB  | YP_745743.1    | methanol dehydrogenase subunit 1                      |
| Granulibacter bethesdensis CGDNIH1      | 8.80E-006 | BamB  | YP_744165.1    | methanol dehydrogenase subunit 1                      |
| Granulibacter bethesdensis CGDNIH1      | 1.10E-005 | BamB  | YP_744472.1    | methanol dehydrogenase subunit 1                      |
| Granulibacter bethesdensis CGDNIH1      | 3.40E-005 | BamB  | YP_743943.1    | methanol dehydrogenase subunit 1                      |
| Granulibacter bethesdensis CGDNIH1      | 7.50E-026 | BamD  | YP_744242.1    | ComL family lipoprotein                               |
| Granulibacter bethesdensis CGDNIH1      | 2.20E-016 | BamE  | YP_744831.1    | SmpA/OmlA family lipoprotein                          |
| Granulibacter bethesdensis CGDNIH1      | 5.40E-005 | BamE  | YP_745011.1    | hypothetical protein GbCGDNIH1_1190                   |
| Granulibacter bethesdensis CGDNIH1      | 6.00E-134 | Omp85 | YP_744761.1    | outer membrane protein assembly factor yaeT           |
| Granulibacter bethesdensis CGDNIH1      | 4.20E-007 | Omp85 | YP_743941.1    | outer membrane protein                                |
| Hirschia baltica ATCC 49814             | 1.40E-053 | BamB  | YP_003060335.1 | pyrrolo-quinoline quinone                             |
| Hirschia baltica ATCC 49814             | 6.10E-019 | BamD  | YP_003058807.1 | outer membrane assembly lipoprotein YfiO              |
| Hirschia baltica ATCC 49814             | 2.60E-005 | BamD  | YP_003060775.1 | tol-pal system protein YbgF                           |
| Hirschia baltica ATCC 49814             | 5.10E-019 | BamE  | YP_003059770.1 | SmpA/OmlA domain-containing protein                   |
| Hirschia baltica ATCC 49814             | 4.10E-112 | Omp85 | YP_003060094.1 | outer membrane protein assembly complex, YaeT protein |
| Hirschia baltica ATCC 49814             | 1.50E-006 | Omp85 | YP_003059159.1 | surface antigen (D15)                                 |
| Hyphomicrobium denitrificans ATCC 51888 | 5.50E-044 | BamB  | YP_003754995.1 | pyrrolo-quinoline quinone                             |
| Hyphomicrobium denitrificans ATCC 51888 | 1.30E-007 | BamB  | YP_003754935.1 | methanol/ethanol family PQQ-dependent dehydrogenase   |
| Hyphomicrobium denitrificans ATCC 51888 | 2.20E-007 | BamB  | YP_003754922.1 | PQQ-dependent enzyme-like protein                     |
| Hyphomicrobium denitrificans ATCC 51888 | 3.60E-007 | BamB  | YP_003755456.1 | methanol/ethanol family PQQ-dependent dehydrogenase   |
| Hyphomicrobium denitrificans ATCC 51888 | 7.20E-006 | BamB  | YP_003754486.1 | methanol/ethanol family PQQ-dependent dehydrogenase   |
| Hyphomicrobium denitrificans ATCC 51888 | 2.40E-005 | BamB  | YP_003756965.1 | methanol/ethanol family PQQ-dependent dehydrogenase   |
| Hyphomicrobium denitrificans ATCC 51888 | 4.40E-020 | BamD  | YP_003754397.1 | outer membrane assembly lipoprotein YfiO              |
| Hyphomicrobium denitrificans ATCC 51888 | 1.90E-016 | BamE  | YP_003755421.1 | SmpA/OmlA domain-containing protein                   |
| Hyphomicrobium denitrificans ATCC 51888 | 7.40E-135 | Omp85 | YP_003756032.1 | outer membrane protein assembly complex, YaeT protein |
| Hyphomicrobium sp. MC1                  | 4.00E-019 | BamD  | YP_004674155.1 | putative lipoprotein UPF0169, hypothetical protein    |
| Hyphomicrobium sp. MC1                  | 1.50E-048 | BamB  | YP_004676961.1 | Pyrrolo-quinoline quinone                             |
| Hyphomicrobium sp. MC1                  | 1.40E-006 | BamB  | YP_004674295.1 | methanol dehydrogenase subunit alpha                  |

## alpha\_e-5

|                                                |           |       |                |                                                                                                                                         |
|------------------------------------------------|-----------|-------|----------------|-----------------------------------------------------------------------------------------------------------------------------------------|
| Hyphomicrobium sp. MC1                         | 2.20E-006 | BamB  | YP_004677526.1 | putative PQQ enzyme repeat protein                                                                                                      |
| Hyphomicrobium sp. MC1                         | 3.20E-006 | BamB  | YP_004675301.1 | Pyrrolo-quinoline quinone                                                                                                               |
| Hyphomicrobium sp. MC1                         | 4.00E-006 | BamB  | YP_004678633.1 | alcohol dehydrogenase                                                                                                                   |
| Hyphomicrobium sp. MC1                         | 7.00E-006 | BamB  | YP_004677389.1 | putative PQQ-linked dehydrogenase                                                                                                       |
| Hyphomicrobium sp. MC1                         | 8.90E-006 | BamB  | YP_004677895.1 | putative PQQ-linked dehydrogenase                                                                                                       |
| Hyphomicrobium sp. MC1                         | 3.50E-005 | BamB  | YP_004674607.1 | putative PQQ-linked dehydrogenase                                                                                                       |
| Hyphomicrobium sp. MC1                         | 2.10E-020 | BamE  | YP_004676446.1 | hypothetical protein HYPMC_2661                                                                                                         |
| Hyphomicrobium sp. MC1                         | 1.20E-139 | Omp85 | YP_004676649.1 | putative outer membrane protein assembly factor                                                                                         |
| Hyphomonas neptunium ATCC 15444                | 9.50E-068 | BamB  | YP_759501.1    | PQQ repeat-containing protein                                                                                                           |
| Hyphomonas neptunium ATCC 15444                | 3.20E-007 | BamB  | YP_758863.1    | alcohol dehydrogenase (acceptor)                                                                                                        |
| Hyphomonas neptunium ATCC 15444                | 1.00E-019 | BamD  | YP_759117.1    | putative competence lipoprotein ComL                                                                                                    |
| Hyphomonas neptunium ATCC 15444                | 9.10E-019 | BamE  | YP_759878.1    | SmpA/OmlA family protein                                                                                                                |
| Hyphomonas neptunium ATCC 15444                | 1.40E-109 | Omp85 | YP_760480.1    | OMP85 family outer membrane protein                                                                                                     |
| Hyphomonas neptunium ATCC 15444                | 4.10E-006 | Omp85 | YP_760558.1    | OMP85 family outer membrane protein                                                                                                     |
| Jannaschia sp. CCS1                            | 9.00E-034 | BamB  | YP_510141.1    | Pyrrolo-quinoline quinone                                                                                                               |
| Jannaschia sp. CCS1                            | 1.50E-018 | BamD  | YP_510690.1    | competence lipoprotein ComL                                                                                                             |
| Jannaschia sp. CCS1                            | 1.60E-017 | BamE  | YP_509730.1    | SmpA/OmlA                                                                                                                               |
| Jannaschia sp. CCS1                            | 9.50E-152 | Omp85 | YP_510395.1    | surface antigen (D15)                                                                                                                   |
| Ketogulonicigenium vulgare Y25                 | 7.80E-023 | BamB  | YP_003963799.1 | pyrrolo-quinoline quinone                                                                                                               |
| Ketogulonicigenium vulgare Y25                 | 1.60E-005 | BamB  | YP_003964325.1 | sorbitol dehydrogenase                                                                                                                  |
| Ketogulonicigenium vulgare Y25                 | 2.30E-005 | BamB  | YP_003963113.1 | sorbose dehydrogenase                                                                                                                   |
| Ketogulonicigenium vulgare Y25                 | 3.60E-005 | BamB  | YP_003965035.1 | sorbose dehydrogenase                                                                                                                   |
| Ketogulonicigenium vulgare Y25                 | 5.40E-005 | BamB  | YP_003965013.1 | sorbose dehydrogenase                                                                                                                   |
| Ketogulonicigenium vulgare Y25                 | 5.80E-006 | BamB  | YP_003965268.1 | pyrrolo-quinoline quinone                                                                                                               |
| Ketogulonicigenium vulgare Y25                 | 1.70E-016 | BamD  | YP_003962855.1 | tetratricopeptide TPR_2 repeat protein                                                                                                  |
| Ketogulonicigenium vulgare Y25                 | 9.30E-011 | BamE  | YP_003963821.1 | lipoprotein, SmpA/OmlA family                                                                                                           |
| Ketogulonicigenium vulgare Y25                 | 7.50E-136 | Omp85 | YP_003963990.1 | outer membrane protein                                                                                                                  |
| Ketogulonicigenium vulgare Y25                 | 1.80E-005 | Omp85 | YP_003964196.1 | outer membrane protein                                                                                                                  |
| Magnetospirillum magneticum AMB-1              | 1.30E-071 | BamB  | YP_420706.1    | WD-40 repeat-containing protein                                                                                                         |
| Magnetospirillum magneticum AMB-1              | 1.20E-008 | BamB  | YP_421058.1    | ankyrin repeat-containing protein                                                                                                       |
| Magnetospirillum magneticum AMB-1              | 1.10E-019 | BamD  | YP_423219.1    | DNA uptake lipoprotein                                                                                                                  |
| Magnetospirillum magneticum AMB-1              | 9.20E-138 | Omp85 | YP_421853.1    | Outer membrane protein/protective antigen OMA87                                                                                         |
| Maricaulis maris MCS10                         | 1.30E-087 | BamB  | YP_756433.1    | Pyrrolo-quinoline quinone                                                                                                               |
| Maricaulis maris MCS10                         | 2.90E-025 | BamD  | YP_757298.1    | DNA uptake lipoprotein-like protein                                                                                                     |
| Maricaulis maris MCS10                         | 1.30E-018 | BamE  | YP_756756.1    | hypothetical protein Mmar10_1526                                                                                                        |
| Maricaulis maris MCS10                         | 8.30E-128 | Omp85 | YP_756618.1    | surface antigen (D15)                                                                                                                   |
| Maricaulis maris MCS10                         | 2.10E-005 | Omp85 | YP_757868.1    | surface antigen (D15)                                                                                                                   |
| Mesorhizobium ciceri biovar biserrulae WSM1271 | 4.20E-005 | BamB  | YP_004134372.1 | pqq-dependent dehydrogenase, methanol/ethanol family<br>glucose/quinate/shikimate family membrane-bound PQQ-<br>dependent dehydrogenase |
| Mesorhizobium ciceri biovar biserrulae WSM1271 | 1.90E-005 | BamB  | YP_004142365.1 | dependent dehydrogenase                                                                                                                 |
| Mesorhizobium ciceri biovar biserrulae WSM1271 | 2.30E-005 | BamB  | YP_004143457.1 | methanol/ethanol family PQQ-dependent dehydrogenase                                                                                     |

## alpha\_e-5

|                                                |           |       |                |                                                                                |
|------------------------------------------------|-----------|-------|----------------|--------------------------------------------------------------------------------|
| Mesorhizobium ciceri biovar biserrulae WSM1271 | 1.10E-019 | BamD  | YP_004142332.1 | outer membrane assembly lipoprotein YfiO                                       |
| Mesorhizobium ciceri biovar biserrulae WSM1271 | 6.20E-035 | BamE  | YP_004143625.1 | SmpA/OmlA domain-containing protein                                            |
| Mesorhizobium ciceri biovar biserrulae WSM1271 | 2.60E-112 | Omp85 | YP_004143140.1 | outer membrane protein assembly complex, YaeT protein                          |
| Mesorhizobium ciceri biovar biserrulae WSM1271 | 1.50E-006 | Omp85 | YP_004142247.1 | surface antigen (D15)                                                          |
| Mesorhizobium loti MAFF303099                  | 7.30E-005 | BamB  | NP_103072.1    | glucose dehydrogenase                                                          |
| Mesorhizobium loti MAFF303099                  | 8.20E-020 | BamD  | NP_103107.1    | hypothetical protein mll1543                                                   |
| Mesorhizobium loti MAFF303099                  | 3.40E-034 | BamE  | NP_108518.1    | hypothetical protein mll8419                                                   |
| Mesorhizobium loti MAFF303099                  | 8.80E-005 | BamE  | NP_106001.1    | hypothetical protein mlr5313                                                   |
| Mesorhizobium loti MAFF303099                  | 2.40E-110 | Omp85 | NP_102404.1    | outer membrane protein                                                         |
| Mesorhizobium loti MAFF303099                  | 4.50E-006 | Omp85 | NP_103198.1    | hypothetical protein mll1662                                                   |
| Mesorhizobium opportunistum WSM2075            | 9.60E-006 | BamB  | YP_004612117.1 | membrane-bound PQQ-dependent dehydrogenase, glucose/quininate/shikimate family |
| Mesorhizobium opportunistum WSM2075            | 5.50E-005 | BamB  | YP_004614925.1 | membrane-bound PQQ-dependent dehydrogenase, glucose/quininate/shikimate family |
| Mesorhizobium opportunistum WSM2075            | 7.60E-005 | BamB  | YP_004612889.1 | PQQ-dependent dehydrogenase, methanol/ethanol family                           |
| Mesorhizobium opportunistum WSM2075            | 1.80E-019 | BamD  | YP_004612085.1 | outer membrane assembly lipoprotein YfiO                                       |
| Mesorhizobium opportunistum WSM2075            | 2.30E-036 | BamE  | YP_004613427.1 | SmpA/OmlA domain-containing protein                                            |
| Mesorhizobium opportunistum WSM2075            | 9.40E-005 | BamE  | YP_004608786.1 | ErfK/YbiS/YcfS/YnhG family protein                                             |
| Mesorhizobium opportunistum WSM2075            | 1.20E-105 | Omp85 | YP_004612788.1 | outer membrane protein assembly complex, YaeT protein                          |
| Mesorhizobium opportunistum WSM2075            | 1.40E-006 | Omp85 | YP_004611995.1 | surface antigen (D15)                                                          |
| Mesorhizobium sp. BNC1                         | 5.70E-007 | BamB  | YP_675152.1    | Pyrrolo-quinoline quinone                                                      |
| Mesorhizobium sp. BNC1                         | 7.60E-007 | BamB  | YP_675153.1    | Pyrrolo-quinoline quinone                                                      |
| Mesorhizobium sp. BNC1                         | 2.00E-006 | BamB  | YP_675431.1    | Pyrrolo-quinoline quinone                                                      |
| Mesorhizobium sp. BNC1                         | 4.50E-005 | BamB  | YP_676061.1    | quinoprotein glucose dehydrogenase                                             |
| Mesorhizobium sp. BNC1                         | 1.40E-022 | BamD  | YP_674557.1    | putative lipoprotein                                                           |
| Mesorhizobium sp. BNC1                         | 1.30E-005 | BamD  | YP_672684.1    | tetratricopeptide TPR_2                                                        |
| Mesorhizobium sp. BNC1                         | 1.10E-037 | BamE  | YP_673703.1    | SmpA/OmlA                                                                      |
| Mesorhizobium sp. BNC1                         | 1.80E-118 | Omp85 | YP_673949.1    | surface antigen (D15)                                                          |
| Mesorhizobium sp. BNC1                         | 7.30E-006 | Omp85 | YP_674082.1    | surface antigen (D15)                                                          |
| Methylobacterium chloromethanicum CM4          | 1.60E-007 | BamB  | YP_002423677.1 | pyrrolo-quinoline quinone                                                      |
| Methylobacterium chloromethanicum CM4          | 3.60E-007 | BamB  | YP_002423222.1 | methanol/ethanol family PQQ-dependent dehydrogenase                            |
| Methylobacterium chloromethanicum CM4          | 4.40E-006 | BamB  | YP_002420334.1 | methanol/ethanol family PQQ-dependent dehydrogenase                            |
| Methylobacterium chloromethanicum CM4          | 5.00E-006 | BamB  | YP_002424324.1 | pyrrolo-quinoline quinone                                                      |
| Methylobacterium chloromethanicum CM4          | 5.00E-021 | BamD  | YP_002421944.1 | outer membrane assembly lipoprotein YfiO                                       |
| Methylobacterium chloromethanicum CM4          | 1.30E-027 | BamE  | YP_002421098.1 | SmpA/OmlA domain-containing protein                                            |
| Methylobacterium chloromethanicum CM4          | 2.90E-086 | Omp85 | YP_002421128.1 | outer membrane protein assembly complex, YaeT protein                          |
| Methylobacterium chloromethanicum CM4          | 7.00E-084 | Omp85 | YP_002423485.1 | outer membrane protein assembly complex, YaeT protein                          |
| Methylobacterium chloromethanicum CM4          | 1.90E-006 | Omp85 | YP_002421758.1 | surface antigen (D15)                                                          |
| Methylobacterium extorquens AM1                | 9.60E-021 | BamD  | YP_002964181.1 | lipoprotein UPF0169, exported protein                                          |
| Methylobacterium extorquens AM1                | 1.60E-007 | BamB  | YP_002965854.1 | quinoprotein alcohol dehydrogenase                                             |
| Methylobacterium extorquens AM1                | 1.40E-006 | BamB  | YP_002965446.1 | methanol dehydrogenase subunit 1 precursor (MDH large alpha subunit) (MEDH)    |

## alpha\_e-5

|                                         |           |       |                |                                                       |
|-----------------------------------------|-----------|-------|----------------|-------------------------------------------------------|
| Methylobacterium extorquens AM1         | 4.40E-006 | BamB  | YP_002962288.1 | quinoprotein ethanol dehydrogenase precursor (QEDH)   |
| Methylobacterium extorquens AM1         | 1.30E-027 | BamE  | YP_002963111.1 | hypothetical protein MexAM1_META1p2032                |
| Methylobacterium extorquens AM1         | 2.90E-086 | Omp85 | YP_002963144.1 | outer membrane protein assembly factor                |
| Methylobacterium extorquens AM1         | 2.20E-006 | Omp85 | YP_002963991.1 | hypothetical protein MexAM1_META1p2962                |
| Methylobacterium extorquens DM4         | 5.00E-021 | BamD  | YP_003069211.1 | lipoprotein UPF0169, exported protein                 |
| Methylobacterium extorquens DM4         | 1.60E-007 | BamB  | YP_003070985.1 | quinoprotein alcohol dehydrogenase                    |
| Methylobacterium extorquens DM4         | 1.40E-006 | BamB  | YP_003070571.1 | methanol dehydrogenase subunit 1                      |
| Methylobacterium extorquens DM4         | 4.40E-006 | BamB  | YP_003067544.1 | quinoprotein ethanol dehydrogenase                    |
| Methylobacterium extorquens DM4         | 1.30E-027 | BamE  | YP_003068332.1 | hypothetical protein METDI2815                        |
| Methylobacterium extorquens DM4         | 2.90E-086 | Omp85 | YP_003068363.1 | outer membrane protein assembly factor                |
| Methylobacterium extorquens DM4         | 2.00E-006 | Omp85 | YP_003069025.1 | hypothetical protein METDI3531                        |
| Methylobacterium extorquens PA1         | 1.80E-007 | BamB  | YP_001641963.1 | Pyrrolo-quinoline quinone                             |
| Methylobacterium extorquens PA1         | 3.60E-007 | BamB  | YP_001641590.1 | methanol/ethanol family PQQ-dependent dehydrogenase   |
| Methylobacterium extorquens PA1         | 4.40E-006 | BamB  | YP_001638811.1 | methanol/ethanol family PQQ-dependent dehydrogenase   |
| Methylobacterium extorquens PA1         | 1.90E-005 | BamB  | YP_001637598.1 | methanol/ethanol family PQQ-dependent dehydrogenase   |
| Methylobacterium extorquens PA1         | 5.00E-021 | BamD  | YP_001640411.1 | putative lipoprotein                                  |
| Methylobacterium extorquens PA1         | 1.30E-027 | BamE  | YP_001639517.1 | SmpA/OmlA domain-containing protein                   |
| Methylobacterium extorquens PA1         | 6.30E-088 | Omp85 | YP_001639548.1 | outer membrane protein assembly complex, YaeT protein |
| Methylobacterium extorquens PA1         | 1.90E-006 | Omp85 | YP_001640227.1 | surface antigen (D15)                                 |
| Methylobacterium nodulans ORS 2060      | 3.30E-007 | BamB  | YP_002490201.1 | PQQ-dependent dehydrogenase, methanol/ethanol family  |
| Methylobacterium nodulans ORS 2060      | 6.80E-005 | BamB  | YP_002497622.1 | PQQ-dependent dehydrogenase                           |
| Methylobacterium nodulans ORS 2060      | 2.40E-021 | BamD  | YP_002502474.1 | outer membrane assembly lipoprotein YfiO              |
| Methylobacterium nodulans ORS 2060      | 5.80E-025 | BamE  | YP_002502122.1 | SmpA/OmlA domain-containing protein                   |
| Methylobacterium nodulans ORS 2060      | 3.50E-080 | Omp85 | YP_002496826.1 | outer membrane protein assembly complex, YaeT protein |
| Methylobacterium nodulans ORS 2060      | 1.20E-007 | Omp85 | YP_002501840.1 | surface antigen (D15)                                 |
| Methylobacterium populi BJ001           | 1.00E-007 | BamB  | YP_001927668.1 | pyrrolo-quinoline quinone                             |
| Methylobacterium populi BJ001           | 2.30E-007 | BamB  | YP_001927264.1 | PQQ-dependent dehydrogenase, methanol/ethanol family  |
| Methylobacterium populi BJ001           | 4.20E-006 | BamB  | YP_001927504.1 | PQQ-dependent dehydrogenase, methanol/ethanol family  |
| Methylobacterium populi BJ001           | 5.10E-024 | BamD  | YP_001925822.1 | lipoprotein                                           |
| Methylobacterium populi BJ001           | 2.50E-028 | BamE  | YP_001924709.1 | SmpA/OmlA domain-containing protein                   |
| Methylobacterium populi BJ001           | 4.20E-087 | Omp85 | YP_001924739.1 | outer membrane protein assembly complex, YaeT protein |
| Methylobacterium populi BJ001           | 1.90E-006 | Omp85 | YP_001925578.1 | surface antigen (D15)                                 |
| Methylobacterium radiotolerans JCM 2831 | 7.30E-008 | BamB  | YP_001753502.1 | Pyrrolo-quinoline quinone                             |
| Methylobacterium radiotolerans JCM 2831 | 3.20E-007 | BamB  | YP_001756860.1 | methanol/ethanol family PQQ-dependent dehydrogenase   |
| Methylobacterium radiotolerans JCM 2831 | 4.70E-006 | BamB  | YP_001755087.1 | methanol/ethanol family PQQ-dependent dehydrogenase   |
| Methylobacterium radiotolerans JCM 2831 | 9.20E-006 | BamB  | YP_001754610.1 | methanol/ethanol family PQQ-dependent dehydrogenase   |
| Methylobacterium radiotolerans JCM 2831 | 5.70E-027 | BamD  | YP_001755026.1 | putative lipoprotein                                  |
| Methylobacterium radiotolerans JCM 2831 | 5.60E-024 | BamE  | YP_001756629.1 | SmpA/OmlA domain-containing protein                   |
| Methylobacterium radiotolerans JCM 2831 | 1.60E-079 | Omp85 | YP_001756099.1 | outer membrane protein assembly complex, YaeT protein |
| Methylobacterium radiotolerans JCM 2831 | 1.40E-006 | Omp85 | YP_001755067.1 | surface antigen (D15)                                 |

## alpha\_e-5

|                                           |           |       |                |                                                       |
|-------------------------------------------|-----------|-------|----------------|-------------------------------------------------------|
| Methylobacterium sp. 4-46                 | 8.10E-006 | BamB  | YP_001770439.1 | methanol/ethanol family PQQ-dependent dehydrogenase   |
| Methylobacterium sp. 4-46                 | 3.90E-005 | BamB  | YP_001769840.1 | methanol/ethanol family PQQ-dependent dehydrogenase   |
| Methylobacterium sp. 4-46                 | 8.70E-005 | BamB  | YP_001768979.1 | methanol/ethanol family PQQ-dependent dehydrogenase   |
| Methylobacterium sp. 4-46                 | 9.90E-005 | BamB  | YP_001772474.1 | methanol/ethanol family PQQ-dependent dehydrogenase   |
| Methylobacterium sp. 4-46                 | 1.50E-021 | BamD  | YP_001773380.1 | putative lipoprotein                                  |
| Methylobacterium sp. 4-46                 | 2.10E-024 | BamE  | YP_001772927.1 | SmpA/OmlA domain-containing protein                   |
| Methylobacterium sp. 4-46                 | 5.90E-084 | Omp85 | YP_001767633.1 | outer membrane protein assembly complex, YaeT protein |
| Methylobacterium sp. 4-46                 | 4.60E-007 | Omp85 | YP_001773084.1 | surface antigen (D15)                                 |
| Methylocella silvestris BL2               | 4.90E-007 | BamB  | YP_002363977.1 | Pyrrolo-quinoline quinone                             |
| Methylocella silvestris BL2               | 8.50E-007 | BamB  | YP_002363146.1 | Pyrrolo-quinoline quinone                             |
| Methylocella silvestris BL2               | 1.20E-006 | BamB  | YP_002360806.1 | PQQ-dependent dehydrogenase                           |
| Methylocella silvestris BL2               | 2.40E-006 | BamB  | YP_002362556.1 | PQQ-dependent dehydrogenase                           |
| Methylocella silvestris BL2               | 3.90E-006 | BamB  | YP_002361898.1 | PQQ-dependent dehydrogenase                           |
| Methylocella silvestris BL2               | 6.70E-006 | BamB  | YP_002363420.1 | PQQ-dependent dehydrogenase                           |
| Methylocella silvestris BL2               | 2.60E-005 | BamB  | YP_002363652.1 | PQQ-dependent dehydrogenase                           |
| Methylocella silvestris BL2               | 6.10E-019 | BamD  | YP_002363747.1 | outer membrane assembly lipoprotein YfiO              |
| Methylocella silvestris BL2               | 3.00E-026 | BamE  | YP_002360990.1 | SmpA/OmlA domain-containing protein                   |
| Methylocella silvestris BL2               | 1.70E-124 | Omp85 | YP_002364081.1 | outer membrane protein assembly complex, YaeT protein |
| Methylocella silvestris BL2               | 8.30E-007 | Omp85 | YP_002362901.1 | surface antigen (D15)                                 |
| Neorickettsia risticii str. Illinois      | 1.30E-012 | BamD  | YP_003082089.1 | competence protein ComL                               |
| Neorickettsia risticii str. Illinois      | 4.10E-042 | Omp85 | YP_003081906.1 | outer membrane protein assembly complex, YaeT protein |
| Neorickettsia sennetsu str. Miyayama      | 2.20E-011 | BamD  | YP_506787.1    | putative competence protein ComL                      |
| Neorickettsia sennetsu str. Miyayama      | 2.00E-007 | BamE  | YP_506092.1    | putative lipoprotein                                  |
| Neorickettsia sennetsu str. Miyayama      | 2.70E-039 | Omp85 | YP_506594.1    | OMP85 family outer membrane protein                   |
| Nitrobacter hamburgensis X14              | 3.70E-019 | BamD  | YP_576573.1    | putative lipoprotein                                  |
| Nitrobacter hamburgensis X14              | 7.00E-006 | BamD  | YP_577425.1    | tetratricopeptide TPR_2                               |
| Nitrobacter hamburgensis X14              | 4.40E-022 | BamE  | YP_576863.1    | SmpA/OmlA                                             |
| Nitrobacter hamburgensis X14              | 6.50E-106 | Omp85 | YP_576978.1    | surface antigen (D15)                                 |
| Nitrobacter winogradskyi Nb-255           | 2.30E-019 | BamD  | YP_317674.1    | putative lipoprotein                                  |
| Nitrobacter winogradskyi Nb-255           | 1.80E-005 | BamD  | YP_318355.1    | hypothetical protein Nwi_1742                         |
| Nitrobacter winogradskyi Nb-255           | 3.60E-022 | BamE  | YP_318016.1    | SmpA/OmlA                                             |
| Nitrobacter winogradskyi Nb-255           | 1.40E-103 | Omp85 | YP_318463.1    | Outer membrane protein                                |
| Nitrobacter winogradskyi Nb-255           | 1.40E-006 | Omp85 | YP_317491.1    | surface antigen (D15)                                 |
| Novosphingobium aromaticivorans DSM 12444 | 3.30E-068 | BamB  | YP_496223.1    | Pyrrolo-quinoline quinone                             |
| Novosphingobium aromaticivorans DSM 12444 | 5.10E-009 | BamB  | YP_498148.1    | Pyrrolo-quinoline quinone                             |
| Novosphingobium aromaticivorans DSM 12444 | 1.40E-007 | BamB  | YP_498140.1    | Pyrrolo-quinoline quinone                             |
| Novosphingobium aromaticivorans DSM 12444 | 9.30E-019 | BamD  | YP_497006.1    | DNA uptake lipoprotein                                |
| Novosphingobium aromaticivorans DSM 12444 | 8.20E-014 | BamE  | YP_497906.1    | SmpA/OmlA                                             |
| Novosphingobium aromaticivorans DSM 12444 | 6.70E-006 | BamE  | YP_498100.1    | hypothetical protein Saro_2830                        |
| Novosphingobium aromaticivorans DSM 12444 | 2.00E-136 | Omp85 | YP_496655.1    | surface antigen (D15)                                 |



## alpha\_e-5

|                                           |           |       |                |                                                               |
|-------------------------------------------|-----------|-------|----------------|---------------------------------------------------------------|
| Novosphingobium aromaticivorans DSM 12444 | 1.80E-007 | Omp85 | YP_496381.1    | surface antigen (D15)                                         |
| Novosphingobium sp. PP1Y                  | 9.60E-069 | BamB  | YP_004533285.1 | pyrrolo-quinoline quinone                                     |
| Novosphingobium sp. PP1Y                  | 7.80E-009 | BamB  | YP_004533882.1 | pyrrolo-quinoline quinone                                     |
| Novosphingobium sp. PP1Y                  | 1.50E-007 | BamB  | YP_004533356.1 | pyrrolo-quinoline quinone                                     |
| Novosphingobium sp. PP1Y                  | 1.10E-006 | BamB  | YP_004533894.1 | alcohol dehydrogenase large subunit                           |
| Novosphingobium sp. PP1Y                  | 2.60E-006 | BamB  | YP_004538410.1 | alcohol dehydrogenase                                         |
| Novosphingobium sp. PP1Y                  | 1.80E-005 | BamB  | YP_004538555.1 | pyrrolo-quinoline quinone                                     |
| Novosphingobium sp. PP1Y                  | 7.80E-020 | BamD  | YP_004535654.1 | DNA uptake lipoprotein                                        |
| Novosphingobium sp. PP1Y                  | 7.00E-011 | BamE  | YP_004533951.1 | SmpA/OmlA protein                                             |
| Novosphingobium sp. PP1Y                  | 6.70E-135 | Omp85 | YP_004534135.1 | surface antigen (D15)                                         |
| Novosphingobium sp. PP1Y                  | 7.00E-007 | Omp85 | YP_004535118.1 | surface antigen (D15)                                         |
| Ochrobactrum anthropi ATCC 49188          | 4.70E-006 | BamB  | YP_001368854.1 | Pyrrolo-quinoline quinone                                     |
| Ochrobactrum anthropi ATCC 49188          | 4.40E-024 | BamD  | YP_001370297.1 | competence protein ComL                                       |
| Ochrobactrum anthropi ATCC 49188          | 2.90E-056 | BamE  | YP_001371065.1 | SmpA/OmlA domain-containing protein                           |
| Ochrobactrum anthropi ATCC 49188          | 2.00E-120 | Omp85 | YP_001370581.1 | surface antigen (D15)                                         |
| Ochrobactrum anthropi ATCC 49188          | 1.90E-006 | Omp85 | YP_001368613.1 | surface antigen (D15)                                         |
| Oligotropha carboxidovorans OM5           | 3.90E-019 | BamD  | YP_002288249.1 | coml, competence lipoprotein                                  |
| Oligotropha carboxidovorans OM5           | 5.00E-025 | BamE  | YP_002288862.1 | SmpA/OmlA                                                     |
| Oligotropha carboxidovorans OM5           | 6.30E-005 | BamE  | YP_002287554.1 | hypothetical protein OCAR_4544                                |
| Oligotropha carboxidovorans OM5           | 3.50E-108 | Omp85 | YP_002288949.1 | outer membrane protein assembly complex                       |
| Orientia tsutsugamushi str. Boryong       | 3.00E-013 | BamB  | YP_001248882.1 | hypothetical protein OTBS_1467                                |
| Orientia tsutsugamushi str. Boryong       | 2.60E-012 | BamD  | YP_001249195.1 | TPR repeat-containing protein                                 |
| Orientia tsutsugamushi str. Boryong       | 8.70E-008 | BamE  | YP_001248357.1 | outer membrane lipoprotein                                    |
| Orientia tsutsugamushi str. Boryong       | 3.40E-023 | Omp85 | YP_001248342.1 | outer membrane protein                                        |
| Orientia tsutsugamushi str. Ikeda         | 2.10E-014 | BamB  | YP_001937474.1 | hypothetical protein OTT_0782                                 |
| Orientia tsutsugamushi str. Ikeda         | 1.50E-012 | BamD  | YP_001936862.1 | ComL-like lipoprotein                                         |
| Orientia tsutsugamushi str. Ikeda         | 1.10E-007 | BamE  | YP_001936707.1 | hypothetical protein homologous to outer membrane lipoprotein |
| Orientia tsutsugamushi str. Ikeda         | 3.30E-017 | Omp85 | YP_001936722.1 | outer membrane protein Omp1                                   |
| Paracoccus denitrificans PD1222           | 2.00E-023 | BamB  | YP_916209.1    | Pyrrolo-quinoline quinone                                     |
| Paracoccus denitrificans PD1222           | 7.00E-006 | BamB  | YP_913833.1    | Pyrrolo-quinoline quinone                                     |
| Paracoccus denitrificans PD1222           | 1.40E-005 | BamB  | YP_916772.1    | Pyrrolo-quinoline quinone                                     |
| Paracoccus denitrificans PD1222           | 2.30E-018 | BamD  | YP_918245.1    | putative ComL lipoprotein                                     |
| Paracoccus denitrificans PD1222           | 4.10E-011 | BamE  | YP_915685.1    | hypothetical protein Pden_1894                                |
| Paracoccus denitrificans PD1222           | 6.30E-005 | Omp85 | YP_916462.1    | surface antigen (D15)                                         |
| Paracoccus denitrificans PD1222           | 3.90E-159 | Omp85 | YP_917761.1    | surface antigen (D15)                                         |
| Parvibaculum lavamentivorans DS-1         | 7.80E-083 | BamB  | YP_001414749.1 | Pyrrolo-quinoline quinone                                     |
| Parvibaculum lavamentivorans DS-1         | 6.20E-008 | BamB  | YP_001412583.1 | Pyrrolo-quinoline quinone                                     |
| Parvibaculum lavamentivorans DS-1         | 3.40E-031 | BamD  | YP_001413696.1 | DNA uptake lipoprotein                                        |
| Parvibaculum lavamentivorans DS-1         | 3.10E-027 | BamE  | YP_001414183.1 | SmpA/OmlA domain-containing protein                           |
| Parvibaculum lavamentivorans DS-1         | 3.40E-136 | Omp85 | YP_001414451.1 | surface antigen (D15)                                         |

## alpha\_e-5

|                                              |           |       |                |                                                                                |
|----------------------------------------------|-----------|-------|----------------|--------------------------------------------------------------------------------|
| Parvibaculum lavamentivorans DS-1            | 6.60E-007 | Omp85 | YP_001411664.1 | surface antigen (D15)                                                          |
| Parvularcula bermudensis HTCC2503            | 1.40E-057 | BamB  | YP_003855715.1 | PQQ enzyme repeat family protein                                               |
| Parvularcula bermudensis HTCC2503            | 3.10E-023 | BamD  | YP_003855280.1 | competence lipoprotein ComL                                                    |
| Parvularcula bermudensis HTCC2503            | 3.80E-006 | BamE  | YP_003854845.1 | lipoprotein, SmpA/OmlA family protein                                          |
| Parvularcula bermudensis HTCC2503            | 3.40E-103 | Omp85 | YP_003853707.1 | outer membrane protein                                                         |
| Parvularcula bermudensis HTCC2503            | 2.90E-006 | Omp85 | YP_003855793.1 | hypothetical protein PB2503_13069                                              |
| Phenylobacterium zucineum HLK1               | 1.10E-139 | BamB  | YP_002130375.1 | PQQ enzyme repeat domain protein                                               |
| Phenylobacterium zucineum HLK1               | 8.00E-008 | BamB  | YP_002131950.1 | glucose dehydrogenase                                                          |
| Phenylobacterium zucineum HLK1               | 4.90E-006 | BamB  | YP_002128900.1 | glucose dehydrogenase                                                          |
| Phenylobacterium zucineum HLK1               | 4.20E-005 | BamB  | YP_002130431.1 | glucose dehydrogenase                                                          |
| Phenylobacterium zucineum HLK1               | 1.50E-020 | BamD  | YP_002131150.1 | DNA uptake lipoprotein                                                         |
| Phenylobacterium zucineum HLK1               | 2.70E-028 | BamE  | YP_002128768.1 | small protein A (tmRNA-binding)                                                |
| Phenylobacterium zucineum HLK1               | 3.20E-031 | BamE  | YP_002130503.1 | small protein A (tmRNA-binding)                                                |
| Phenylobacterium zucineum HLK1               | 7.50E-005 | BamE  | YP_002132202.1 | hypothetical protein PHZ_c3364                                                 |
| Phenylobacterium zucineum HLK1               | 1.20E-135 | Omp85 | YP_002130612.1 | outer membrane protein                                                         |
| Phenylobacterium zucineum HLK1               | 6.90E-007 | Omp85 | YP_002130250.1 | hypothetical protein PHZ_c1407                                                 |
| Polymorphum gilvum SL003B-26A1               | 4.20E-038 | BamB  | YP_004304144.1 | PQQ enzyme repeat domain-containing protein                                    |
| Polymorphum gilvum SL003B-26A1               | 2.20E-005 | BamB  | YP_004302745.1 | methanol dehydrogenase large subunit-like protein                              |
| Polymorphum gilvum SL003B-26A1               | 1.70E-020 | BamD  | YP_004303083.1 | DNA uptake lipoprotein-like protein                                            |
| Polymorphum gilvum SL003B-26A1               | 2.60E-025 | BamE  | YP_004303653.1 | SmpA/OmlA protein                                                              |
| Polymorphum gilvum SL003B-26A1               | 1.50E-150 | Omp85 | YP_004303828.1 | Outer membrane protein assembly complex, YaeT protein                          |
| Polymorphum gilvum SL003B-26A1               | 1.90E-006 | Omp85 | YP_004304522.1 | Outer membrane protein, OMP85 family                                           |
| Rhizobium etli CFN 42                        | 2.30E-005 | BamB  | YP_468754.1    | glucose dehydrogenase (pyrroloquinoline-quinone) protein                       |
| Rhizobium etli CFN 42                        | 7.20E-020 | BamD  | YP_470333.1    | hypothetical protein RHE_CH02838                                               |
| Rhizobium etli CFN 42                        | 5.30E-032 | BamE  | YP_469058.1    | hypothetical protein RHE_CH01528                                               |
| Rhizobium etli CFN 42                        | 1.50E-122 | Omp85 | YP_469433.1    | outer membrane lipoprotein                                                     |
| Rhizobium etli CFN 42                        | 9.50E-007 | Omp85 | YP_471322.1    | outer membrane protein, protective antigen                                     |
| Rhizobium etli CIAT 652                      | 4.60E-005 | BamB  | YP_001977468.1 | glucose dehydrogenase (pyrroloquinoline-quinone) protein                       |
| Rhizobium etli CIAT 652                      | 1.90E-019 | BamD  | YP_001979115.1 | competence lipoprotein protein                                                 |
| Rhizobium etli CIAT 652                      | 1.10E-031 | BamE  | YP_001977755.1 | outer membrane protein                                                         |
| Rhizobium etli CIAT 652                      | 5.80E-122 | Omp85 | YP_001978156.1 | outer membrane lipoprotein                                                     |
| Rhizobium etli CIAT 652                      | 7.10E-007 | Omp85 | YP_001980236.1 | outer membrane protein, protective antigen                                     |
| Rhizobium leguminosarum bv. trifolii WSM1325 | 4.90E-006 | BamB  | YP_002974814.1 | membrane-bound PQQ-dependent dehydrogenase, glucose/quininate/shikimate family |
| Rhizobium leguminosarum bv. trifolii WSM1325 | 1.50E-019 | BamD  | YP_002976642.1 | outer membrane assembly lipoprotein YfiO                                       |
| Rhizobium leguminosarum bv. trifolii WSM1325 | 3.20E-032 | BamE  | YP_002975113.1 | SmpA/OmlA domain protein                                                       |
| Rhizobium leguminosarum bv. trifolii WSM1325 | 8.20E-121 | Omp85 | YP_002975607.1 | outer membrane protein assembly complex, YaeT protein                          |
| Rhizobium leguminosarum bv. trifolii WSM1325 | 1.10E-006 | Omp85 | YP_002977695.1 | surface antigen (D15)                                                          |
| Rhizobium leguminosarum bv. trifolii WSM2304 | 1.90E-005 | BamB  | YP_002280376.1 | membrane-bound PQQ-dependent dehydrogenase, glucose/quininate/shikimate family |
| Rhizobium leguminosarum bv. trifolii WSM2304 | 1.60E-019 | BamD  | YP_002282081.1 | outer membrane assembly lipoprotein YfiO                                       |

## alpha\_e-5

|                                              |           |       |                |                                                       |
|----------------------------------------------|-----------|-------|----------------|-------------------------------------------------------|
| Rhizobium leguminosarum bv. trifolii WSM2304 | 2.80E-029 | BamE  | YP_002280713.1 | SmpA/OmlA domain-containing protein                   |
| Rhizobium leguminosarum bv. trifolii WSM2304 | 4.80E-122 | Omp85 | YP_002281106.1 | outer membrane protein assembly complex, YaeT protein |
| Rhizobium leguminosarum bv. trifolii WSM2304 | 8.60E-007 | Omp85 | YP_002283117.1 | hypothetical protein Rleg2_3626                       |
| Rhizobium leguminosarum bv. viciae 3841      | 6.00E-006 | BamB  | YP_766960.1    | quinoprotein glucose dehydrogenase                    |
| Rhizobium leguminosarum bv. viciae 3841      | 1.10E-019 | BamD  | YP_768875.1    | competence lipoprotein ComL protein                   |
| Rhizobium leguminosarum bv. viciae 3841      | 1.20E-031 | BamE  | YP_767239.1    | outer membrane protein                                |
| Rhizobium leguminosarum bv. viciae 3841      | 4.40E-120 | Omp85 | YP_767822.1    | outer membrane protein                                |
| Rhizobium leguminosarum bv. viciae 3841      | 5.50E-007 | Omp85 | YP_769952.1    | cell surface protein                                  |
| Rhodobacter capsulatus SB 1003               | 5.10E-029 | BamB  | YP_003578440.1 | PQQ enzyme repeat family protein                      |
| Rhodobacter capsulatus SB 1003               | 8.70E-008 | BamB  | YP_003577809.1 | quinoprotein ethanol dehydrogenase                    |
| Rhodobacter capsulatus SB 1003               | 2.60E-007 | BamB  | YP_003577549.1 | quinoprotein ethanol dehydrogenase                    |
| Rhodobacter capsulatus SB 1003               | 2.00E-017 | BamD  | YP_003577000.1 | competence lipoprotein ComL                           |
| Rhodobacter capsulatus SB 1003               | 4.70E-017 | BamE  | YP_003578059.1 | SmpA/OmlA domain-containing protein                   |
| Rhodobacter capsulatus SB 1003               | 4.20E-149 | Omp85 | YP_003577784.1 | outer membrane protein assembly factor YaeT           |
| Rhodobacter capsulatus SB 1003               | 3.40E-005 | Omp85 | YP_003576199.1 | surface antigen                                       |
| Rhodobacter sphaeroides 2.4.1                | 3.80E-036 | BamB  | YP_352753.1    | putative quinoprotein                                 |
| Rhodobacter sphaeroides 2.4.1                | 3.60E-006 | BamB  | YP_352728.1    | quinoprotein glucose dehydrogenase                    |
| Rhodobacter sphaeroides 2.4.1                | 2.40E-005 | BamB  | YP_352636.1    | putative PQQ dehydrogenase protein                    |
| Rhodobacter sphaeroides 2.4.1                | 6.90E-018 | BamD  | YP_352172.1    | putative ComL lipoprotein                             |
| Rhodobacter sphaeroides 2.4.1                | 9.30E-012 | BamE  | YP_352674.1    | hypothetical protein RSP_2616                         |
| Rhodobacter sphaeroides 2.4.1                | 3.50E-169 | Omp85 | YP_352767.1    | putative outer membrane protein                       |
| Rhodobacter sphaeroides 2.4.1                | 4.10E-005 | Omp85 | YP_354267.1    | putative outer membrane protein                       |
| Rhodobacter sphaeroides ATCC 17025           | 7.40E-030 | BamB  | YP_001168356.1 | Pyrrolo-quinoline quinone                             |
| Rhodobacter sphaeroides ATCC 17025           | 4.00E-005 | BamB  | YP_001167417.1 | quinoprotein glucose dehydrogenase                    |
| Rhodobacter sphaeroides ATCC 17025           | 5.10E-005 | BamB  | YP_001168141.1 | Pyrrolo-quinoline quinone                             |
| Rhodobacter sphaeroides ATCC 17025           | 5.80E-018 | BamD  | YP_001166913.1 | TPR repeat-containing protein                         |
| Rhodobacter sphaeroides ATCC 17025           | 9.90E-013 | BamE  | YP_001168104.1 | SmpA/OmlA domain-containing protein                   |
| Rhodobacter sphaeroides ATCC 17025           | 1.70E-169 | Omp85 | YP_001168341.1 | surface antigen (D15)                                 |
| Rhodobacter sphaeroides ATCC 17025           | 4.90E-005 | Omp85 | YP_001168813.1 | surface antigen (D15)                                 |
| Rhodobacter sphaeroides ATCC 17029           | 4.20E-035 | BamB  | YP_001043237.1 | Pyrrolo-quinoline quinone                             |
| Rhodobacter sphaeroides ATCC 17029           | 6.20E-006 | BamB  | YP_001043212.1 | quinoprotein glucose dehydrogenase                    |
| Rhodobacter sphaeroides ATCC 17029           | 2.30E-005 | BamB  | YP_001043118.1 | Pyrrolo-quinoline quinone                             |
| Rhodobacter sphaeroides ATCC 17029           | 4.80E-018 | BamD  | YP_001042675.1 | TPR repeat-containing protein                         |
| Rhodobacter sphaeroides ATCC 17029           | 1.80E-012 | BamE  | YP_001043156.1 | SmpA/OmlA domain-containing protein                   |
| Rhodobacter sphaeroides ATCC 17029           | 2.80E-169 | Omp85 | YP_001043251.1 | surface antigen (D15)                                 |
| Rhodobacter sphaeroides ATCC 17029           | 3.50E-005 | Omp85 | YP_001044718.1 | surface antigen (D15)                                 |
| Rhodobacter sphaeroides KD131                | 1.70E-034 | BamB  | YP_002525374.1 | Pyrrolo-quinoline quinone                             |
| Rhodobacter sphaeroides KD131                | 4.50E-006 | BamB  | YP_002525348.1 | Quinoprotein glucose dehydrogenase                    |
| Rhodobacter sphaeroides KD131                | 2.40E-005 | BamB  | YP_002525251.1 | Pyrrolo-quinoline quinone                             |
| Rhodobacter sphaeroides KD131                | 4.80E-018 | BamD  | YP_002524788.1 | hypothetical protein RSKD131_0427                     |

## alpha\_e-5

|                                     |           |       |                |                                                       |
|-------------------------------------|-----------|-------|----------------|-------------------------------------------------------|
| Rhodobacter sphaeroides KD131       | 1.30E-009 | BamE  | YP_002525289.1 | SmpA/OmlA domain-containing protein                   |
| Rhodobacter sphaeroides KD131       | 1.50E-166 | Omp85 | YP_002525389.1 | Surface antigen (D15)                                 |
| Rhodobacter sphaeroides KD131       | 3.00E-005 | Omp85 | YP_002526941.1 | Surface antigen (D15)                                 |
| Rhodomicrobium vannielii ATCC 17100 | 1.20E-043 | BamB  | YP_004012494.1 | pyrrolo-quinoline quinone repeat-containing protein   |
| Rhodomicrobium vannielii ATCC 17100 | 2.70E-006 | BamB  | YP_004012163.1 | PQQ-dependent dehydrogenase                           |
| Rhodomicrobium vannielii ATCC 17100 | 4.10E-022 | BamD  | YP_004012432.1 | outer membrane assembly lipoprotein YfiO              |
| Rhodomicrobium vannielii ATCC 17100 | 7.50E-028 | BamE  | YP_004011666.1 | SmpA/OmlA domain-containing protein                   |
| Rhodomicrobium vannielii ATCC 17100 | 4.40E-116 | Omp85 | YP_004012337.1 | outer membrane protein assembly complex, YaeT protein |
| Rhodomicrobium vannielii ATCC 17100 | 3.30E-096 | Omp85 | YP_004013249.1 | outer membrane protein assembly complex, YaeT protein |
| Rhodopseudomonas palustris BisA53   | 3.30E-007 | BamB  | YP_782055.1    | Pyrrolo-quinoline quinone                             |
| Rhodopseudomonas palustris BisA53   | 3.80E-007 | BamB  | YP_782435.1    | Pyrrolo-quinoline quinone                             |
| Rhodopseudomonas palustris BisA53   | 1.70E-006 | BamB  | YP_779787.1    | Pyrrolo-quinoline quinone                             |
| Rhodopseudomonas palustris BisA53   | 1.60E-018 | BamD  | YP_781042.1    | putative lipoprotein                                  |
| Rhodopseudomonas palustris BisA53   | 1.20E-024 | BamE  | YP_781739.1    | SmpA/OmlA domain-containing protein                   |
| Rhodopseudomonas palustris BisA53   | 2.40E-100 | Omp85 | YP_781479.1    | surface antigen (D15)                                 |
| Rhodopseudomonas palustris BisB18   | 1.10E-007 | BamB  | YP_531783.1    | Pyrrolo-quinoline quinone                             |
| Rhodopseudomonas palustris BisB18   | 2.30E-018 | BamD  | YP_533157.1    | putative lipoprotein                                  |
| Rhodopseudomonas palustris BisB18   | 4.20E-020 | BamE  | YP_532540.1    | SmpA/OmlA                                             |
| Rhodopseudomonas palustris BisB18   | 3.70E-114 | Omp85 | YP_532314.1    | surface antigen (D15)                                 |
| Rhodopseudomonas palustris BisB5    | 3.30E-008 | BamB  | YP_570237.1    | Pyrrolo-quinoline quinone                             |
| Rhodopseudomonas palustris BisB5    | 5.60E-018 | BamD  | YP_570509.1    | putative lipoprotein                                  |
| Rhodopseudomonas palustris BisB5    | 3.20E-019 | BamE  | YP_569812.1    | SmpA/OmlA                                             |
| Rhodopseudomonas palustris BisB5    | 1.10E-104 | Omp85 | YP_569978.1    | surface antigen (D15)                                 |
| Rhodopseudomonas palustris CGA009   | 6.80E-008 | BamB  | NP_948527.1    | alcohol dehydrogenase                                 |
| Rhodopseudomonas palustris CGA009   | 3.30E-018 | BamD  | NP_948858.1    | putative lipoprotein                                  |
| Rhodopseudomonas palustris CGA009   | 2.00E-022 | BamE  | NP_948080.1    | SmpA/OmlA                                             |
| Rhodopseudomonas palustris CGA009   | 4.60E-107 | Omp85 | NP_948255.1    | putative outer membrane protein                       |
| Rhodopseudomonas palustris DX-1     | 5.70E-008 | BamB  | YP_004108567.1 | PQQ-dependent dehydrogenase                           |
| Rhodopseudomonas palustris DX-1     | 6.00E-019 | BamD  | YP_004108179.1 | outer membrane assembly lipoprotein YfiO              |
| Rhodopseudomonas palustris DX-1     | 2.00E-022 | BamE  | YP_004109084.1 | SmpA/OmlA domain-containing protein                   |
| Rhodopseudomonas palustris DX-1     | 2.70E-106 | Omp85 | YP_004108911.1 | outer membrane protein assembly complex, YaeT protein |
| Rhodopseudomonas palustris HaA2     | 6.00E-008 | BamB  | YP_485971.1    | Pyrrolo-quinoline quinone                             |
| Rhodopseudomonas palustris HaA2     | 2.00E-018 | BamD  | YP_485625.1    | putative lipoprotein                                  |
| Rhodopseudomonas palustris HaA2     | 3.30E-023 | BamE  | YP_486259.1    | SmpA/OmlA                                             |
| Rhodopseudomonas palustris HaA2     | 2.90E-105 | Omp85 | YP_486433.1    | surface antigen (D15)                                 |
| Rhodopseudomonas palustris HaA2     | 1.00E-097 | Omp85 | YP_484373.1    | surface antigen                                       |
| Rhodopseudomonas palustris TIE-1    | 6.30E-008 | BamB  | YP_001992576.1 | PQQ-dependent dehydrogenase, methanol/ethanol family  |
| Rhodopseudomonas palustris TIE-1    | 2.70E-018 | BamD  | YP_001993009.1 | outer membrane assembly lipoprotein YfiO              |
| Rhodopseudomonas palustris TIE-1    | 3.40E-023 | BamE  | YP_001991997.1 | SmpA/OmlA domain-containing protein                   |
| Rhodopseudomonas palustris TIE-1    | 4.60E-107 | Omp85 | YP_001992237.1 | outer membrane protein assembly complex, YaeT protein |

## alpha\_e-5

|                                   |           |       |                |                                         |
|-----------------------------------|-----------|-------|----------------|-----------------------------------------|
| Rhodospirillum centenum SW        | 5.00E-083 | BamB  | YP_002297619.1 | PQQ enzyme repeat family protein        |
| Rhodospirillum centenum SW        | 3.30E-005 | BamB  | YP_002300042.1 | quinoprotein glucose dehydrogenase      |
| Rhodospirillum centenum SW        | 6.40E-020 | BamD  | YP_002296853.1 | tetratricopeptide repeat family protein |
| Rhodospirillum centenum SW        | 2.60E-029 | BamE  | YP_002297549.1 | SmpA                                    |
| Rhodospirillum centenum SW        | 1.90E-146 | Omp85 | YP_002297427.1 | outer membrane protein, putative        |
| Rhodospirillum centenum SW        | 1.80E-007 | Omp85 | YP_002300080.1 | outer membrane protein, OMP85 family    |
| Rhodospirillum rubrum ATCC 11170  | 2.10E-064 | BamB  | YP_428167.1    | Pyrrolo-quinoline quinone               |
| Rhodospirillum rubrum ATCC 11170  | 1.70E-032 | BamD  | YP_426029.1    | competence lipoprotein ComL             |
| Rhodospirillum rubrum ATCC 11170  | 5.50E-005 | BamD  | YP_427440.1    | tetratricopeptide TPR_4                 |
| Rhodospirillum rubrum ATCC 11170  | 1.30E-056 | BamE  | YP_426749.1    | smpA/OmlA                               |
| Rhodospirillum rubrum ATCC 11170  | 1.60E-141 | Omp85 | YP_426681.1    | surface antigen D15                     |
| Rhodospirillum rubrum ATCC 11170  | 4.40E-006 | Omp85 | YP_427186.1    | surface antigen                         |
| Rickettsia africae ESF-5          | 3.30E-219 | BamB  | YP_002844981.1 | WD40-like repeat protein                |
| Rickettsia africae ESF-5          | 1.50E-017 | BamD  | YP_002844927.1 | DNA uptake lipoprotein                  |
| Rickettsia africae ESF-5          | 8.70E-010 | BamE  | YP_002845638.1 | tmRNA-binding protein                   |
| Rickettsia africae ESF-5          | 1.00E-081 | Omp85 | YP_002844903.1 | Outer membrane protein omp1             |
| Rickettsia akari str. Hartford    | 5.90E-201 | BamB  | YP_001493161.1 | WD-40 repeat-containing protein         |
| Rickettsia akari str. Hartford    | 1.30E-017 | BamD  | YP_001493089.1 | hypothetical protein A1C_01315          |
| Rickettsia akari str. Hartford    | 9.80E-010 | BamE  | YP_001493946.1 | hypothetical protein A1C_06025          |
| Rickettsia akari str. Hartford    | 2.60E-083 | Omp85 | YP_001493063.1 | Outer membrane protein omp1             |
| Rickettsia bellii OSU 85-389      | 2.60E-153 | BamB  | YP_001496675.1 | WD-40 repeat-containing protein         |
| Rickettsia bellii OSU 85-389      | 1.90E-018 | BamD  | YP_001495786.1 | DNA uptake lipoprotein                  |
| Rickettsia bellii OSU 85-389      | 2.00E-009 | BamE  | YP_001496795.1 | tmRNA-binding protein                   |
| Rickettsia bellii OSU 85-389      | 9.20E-064 | Omp85 | YP_001495771.1 | Outer membrane protein omp1             |
| Rickettsia bellii RML369-C        | 2.60E-153 | BamB  | YP_537395.1    | WD-40 repeat-containing protein         |
| Rickettsia bellii RML369-C        | 1.90E-018 | BamD  | YP_538272.1    | DNA uptake lipoprotein                  |
| Rickettsia bellii RML369-C        | 2.00E-009 | BamE  | YP_537296.1    | tmRNA-binding protein                   |
| Rickettsia bellii RML369-C        | 8.50E-062 | Omp85 | YP_538287.1    | Outer membrane protein omp1             |
| Rickettsia canadensis str. McKiel | 5.80E-188 | BamB  | YP_001491998.1 | DNA topoisomerase IV subunit B          |
| Rickettsia canadensis str. McKiel | 1.50E-016 | BamD  | YP_001491916.1 | hypothetical protein A1E_00915          |
| Rickettsia canadensis str. McKiel | 8.40E-009 | BamE  | YP_001492693.1 | hypothetical protein A1E_04960          |
| Rickettsia canadensis str. McKiel | 2.80E-073 | Omp85 | YP_001491896.1 | Outer membrane protein omp1             |
| Rickettsia conorii str. Malish 7  | 5.80E-222 | BamB  | NP_359951.1    | hypothetical protein RC0314             |
| Rickettsia conorii str. Malish 7  | 2.70E-017 | BamD  | NP_359867.1    | hypothetical protein RC0230             |
| Rickettsia conorii str. Malish 7  | 8.70E-010 | BamE  | NP_360841.1    | hypothetical protein RC1204             |
| Rickettsia conorii str. Malish 7  | 1.10E-078 | Omp85 | NP_359839.1    | outer membrane protein omp1             |
| Rickettsia felis URRWXCa2         | 9.10E-212 | BamB  | YP_247009.1    | WD-40 repeat-containing protein         |
| Rickettsia felis URRWXCa2         | 3.60E-017 | BamD  | YP_247104.1    | hypothetical protein RF_1088            |
| Rickettsia felis URRWXCa2         | 3.20E-010 | BamE  | YP_247253.1    | hypothetical protein RF_1237            |
| Rickettsia felis URRWXCa2         | 1.60E-083 | Omp85 | YP_247137.1    | Outer membrane protein omp1             |

## alpha\_e-5

|                                           |           |       |                |                                                      |
|-------------------------------------------|-----------|-------|----------------|------------------------------------------------------|
| Rickettsia heilongjiangensis 054          | 1.80E-217 | BamB  | YP_004764033.1 | WD-40 repeat-containing protein                      |
| Rickettsia heilongjiangensis 054          | 2.20E-017 | BamD  | YP_004763949.1 | DNA uptake lipoprotein                               |
| Rickettsia heilongjiangensis 054          | 9.60E-010 | BamE  | YP_004764847.1 | tmRNA-binding protein                                |
| Rickettsia heilongjiangensis 054          | 3.10E-080 | Omp85 | YP_004763921.1 | outer membrane protein omp1                          |
| Rickettsia massiliae MTU5                 | 1.20E-216 | BamB  | YP_001499123.1 | WD-40 repeat-containing protein                      |
| Rickettsia massiliae MTU5                 | 6.60E-018 | BamD  | YP_001499072.1 | DNA uptake lipoprotein                               |
| Rickettsia massiliae MTU5                 | 5.00E-010 | BamE  | YP_001499748.1 | tmRNA-binding protein                                |
| Rickettsia massiliae MTU5                 | 3.20E-080 | Omp85 | YP_001499051.1 | Outer membrane protein omp1                          |
| Rickettsia peacockii str. Rustic          | 2.30E-217 | BamB  | YP_002916258.1 | PQQ repeat-containing protein                        |
| Rickettsia peacockii str. Rustic          | 2.20E-017 | BamD  | YP_002916311.1 | ComL family lipoprotein                              |
| Rickettsia peacockii str. Rustic          | 1.30E-009 | BamE  | YP_002916439.1 | SmpA/OmlA family lipoprotein                         |
| Rickettsia peacockii str. Rustic          | 3.10E-080 | Omp85 | YP_002916206.1 | outer membrane protein assembly factor               |
| Rickettsia prowazekii str. Madrid E       | 6.50E-168 | BamB  | NP_220618.1    | hypothetical protein RP232                           |
| Rickettsia prowazekii str. Madrid E       | 1.70E-017 | BamD  | NP_220572.1    | hypothetical protein RP183                           |
| Rickettsia prowazekii str. Madrid E       | 8.30E-009 | BamE  | NP_221125.1    | hypothetical protein RP774                           |
| Rickettsia prowazekii str. Madrid E       | 1.20E-082 | Omp85 | NP_220550.1    | outer membrane protein OMP1 (omp1)                   |
| Rickettsia rickettsii str. 'Sheila Smith' | 6.30E-217 | BamB  | YP_001494432.1 | hypothetical protein A1G_01790                       |
| Rickettsia rickettsii str. 'Sheila Smith' | 3.20E-017 | BamD  | YP_001494351.1 | hypothetical protein A1G_01315                       |
| Rickettsia rickettsii str. 'Sheila Smith' | 8.70E-010 | BamE  | YP_001495277.1 | hypothetical protein A1G_06580                       |
| Rickettsia rickettsii str. 'Sheila Smith' | 1.00E-079 | Omp85 | YP_001494320.1 | outer membrane protein omp1                          |
| Rickettsia rickettsii str. Iowa           | 6.30E-217 | BamB  | YP_001649681.1 | PQQ enzyme repeat family protein                     |
| Rickettsia rickettsii str. Iowa           | 3.20E-017 | BamD  | YP_001649600.1 | ComL family lipoprotein                              |
| Rickettsia rickettsii str. Iowa           | 8.70E-010 | BamE  | YP_001650548.1 | SmpA/OmlA family lipoprotein                         |
| Rickettsia rickettsii str. Iowa           | 1.00E-079 | Omp85 | YP_001649567.1 | outer membrane protein assembly factor               |
| Rickettsia typhi str. Wilmington          | 3.50E-166 | BamB  | YP_067188.1    | hypothetical protein RT0224                          |
| Rickettsia typhi str. Wilmington          | 6.50E-018 | BamD  | YP_067140.1    | lipoprotein                                          |
| Rickettsia typhi str. Wilmington          | 6.60E-009 | BamE  | YP_067699.1    | hypothetical protein RT0761                          |
| Rickettsia typhi str. Wilmington          | 2.80E-084 | Omp85 | YP_067116.1    | outer membrane protein Omp1                          |
| Roseobacter denitrificans OCh 114         | 9.60E-021 | BamB  | YP_682086.1    | PQQ repeat-containing protein                        |
| Roseobacter denitrificans OCh 114         | 4.00E-005 | BamB  | YP_681244.1    | methanol dehydrogenase, large subunit                |
| Roseobacter denitrificans OCh 114         | 5.80E-017 | BamD  | YP_683530.1    | competence lipoprotein ComL, putative                |
| Roseobacter denitrificans OCh 114         | 4.70E-011 | BamE  | YP_683345.1    | putative lipoprotein                                 |
| Roseobacter denitrificans OCh 114         | 1.30E-179 | Omp85 | YP_682830.1    | outer membrane protein, putative                     |
| Roseobacter denitrificans OCh 114         | 7.80E-005 | Omp85 | YP_682591.1    | outer membrane protein, putative                     |
| Roseobacter litoralis OCh 149             | 1.60E-022 | BamB  | YP_004691856.1 | quinoprotein                                         |
| Roseobacter litoralis OCh 149             | 8.90E-005 | BamB  | YP_004692646.1 | PQQ-dependent dehydrogenase, methanol/ethanol family |
| Roseobacter litoralis OCh 149             | 6.80E-017 | BamD  | YP_004691493.1 | outer membrane assembly lipoprotein                  |
| Roseobacter litoralis OCh 149             | 7.80E-011 | BamE  | YP_004691313.1 | lipoprotein-like protein                             |
| Roseobacter litoralis OCh 149             | 9.70E-182 | Omp85 | YP_004690914.1 | outer membrane assembly factor                       |
| Roseobacter litoralis OCh 149             | 7.80E-005 | Omp85 | YP_004691108.1 | surface antigen-like protein                         |

## alpha\_e-5

|                                |           |       |                |                                                                             |
|--------------------------------|-----------|-------|----------------|-----------------------------------------------------------------------------|
| Ruegeria pomeroyi DSS-3        | 1.90E-020 | BamB  | YP_167552.1    | PQQ repeat-containing protein                                               |
| Ruegeria pomeroyi DSS-3        | 3.30E-008 | BamB  | YP_166749.1    | quinoprotein ethanol dehydrogenase                                          |
| Ruegeria pomeroyi DSS-3        | 7.70E-017 | BamD  | YP_166453.1    | competence lipoprotein ComL, putative                                       |
| Ruegeria pomeroyi DSS-3        | 2.50E-018 | BamE  | YP_167706.1    | SmpA/OmlA family lipoprotein                                                |
| Ruegeria pomeroyi DSS-3        | 0.00E+000 | Omp85 | YP_166909.1    | OMP85 family outer membrane protein                                         |
| Ruegeria sp. TM1040            | 3.80E-026 | BamB  | YP_612985.1    | Pyrrolo-quinoline quinone                                                   |
| Ruegeria sp. TM1040            | 9.90E-017 | BamD  | YP_612686.1    | competence lipoprotein ComL, putative                                       |
| Ruegeria sp. TM1040            | 1.10E-011 | BamE  | YP_612913.1    | SmpA/OmlA family lipoprotein                                                |
| Ruegeria sp. TM1040            | 9.80E-193 | Omp85 | YP_613402.1    | surface antigen (D15)                                                       |
| Sinorhizobium fredii NGR234    | 4.50E-008 | BamB  | YP_002822542.1 | alcohol dehydrogenase                                                       |
| Sinorhizobium fredii NGR234    | 3.60E-005 | BamB  | YP_002825284.1 | glucose dehydrogenase (pyrroloquinoline-quinone) protein                    |
| Sinorhizobium fredii NGR234    | 3.50E-021 | BamD  | YP_002826615.1 | competence lipoprotein ComL                                                 |
| Sinorhizobium fredii NGR234    | 1.50E-034 | BamE  | YP_002825511.1 | putative outer membrane protein                                             |
| Sinorhizobium fredii NGR234    | 1.30E-130 | Omp85 | YP_002825874.1 | group 1 outer membrane protein precursor                                    |
| Sinorhizobium fredii NGR234    | 5.10E-007 | Omp85 | YP_002827566.1 | putative cell surface protein                                               |
| Sinorhizobium medicae WSM419   | 3.10E-005 | BamB  | YP_001312686.1 | Pyrrolo-quinoline quinone                                                   |
| Sinorhizobium medicae WSM419   | 7.90E-006 | BamB  | YP_001314876.1 | Pyrrolo-quinoline quinone                                                   |
| Sinorhizobium medicae WSM419   | 1.50E-005 | BamB  | YP_001326286.1 | quinoprotein glucose dehydrogenase                                          |
| Sinorhizobium medicae WSM419   | 2.90E-020 | BamD  | YP_001327740.1 | hypothetical protein Smed_2072                                              |
| Sinorhizobium medicae WSM419   | 3.10E-035 | BamE  | YP_001326516.1 | SmpA/OmlA domain-containing protein                                         |
| Sinorhizobium medicae WSM419   | 5.90E-128 | Omp85 | YP_001326824.1 | surface antigen (D15)                                                       |
| Sinorhizobium medicae WSM419   | 1.10E-006 | Omp85 | YP_001328552.1 | surface antigen (D15)                                                       |
| Sinorhizobium meliloti 1021    | 1.10E-005 | BamB  | NP_385087.1    | glucose dehydrogenase                                                       |
| Sinorhizobium meliloti 1021    | 5.20E-005 | BamB  | NP_436713.1    | methanol dehydrogenase, large subunit                                       |
| Sinorhizobium meliloti 1021    | 3.20E-020 | BamD  | NP_386272.1    | hypothetical protein SMc01876                                               |
| Sinorhizobium meliloti 1021    | 1.90E-035 | BamE  | NP_385325.1    | hypothetical protein SMc01781                                               |
| Sinorhizobium meliloti 1021    | 2.20E-122 | Omp85 | NP_385608.1    | outer membrane transmembrane protein                                        |
| Sinorhizobium meliloti 1021    | 1.90E-006 | Omp85 | NP_387102.1    | hypothetical protein SMc03097                                               |
| Sinorhizobium meliloti AK83    | 1.10E-005 | BamB  | YP_004548064.1 | glucose/quinone/shikimate family membrane-bound PQQ-dependent dehydrogenase |
| Sinorhizobium meliloti AK83    | 5.20E-005 | BamB  | YP_004556573.1 | PQQ-dependent dehydrogenase methanol/ethanol family protein                 |
| Sinorhizobium meliloti AK83    | 3.20E-020 | BamD  | YP_004549480.1 | outer membrane assembly lipoprotein YfiO                                    |
| Sinorhizobium meliloti AK83    | 1.90E-035 | BamE  | YP_004548382.1 | SmpA/OmlA domain-containing protein                                         |
| Sinorhizobium meliloti AK83    | 2.20E-122 | Omp85 | YP_004548666.1 | outer membrane protein assembly complex YaeT protein                        |
| Sinorhizobium meliloti AK83    | 8.40E-007 | Omp85 | YP_004550371.1 | surface antigen (D15)                                                       |
| Sphingobium chlorophenicum L-1 | 3.50E-068 | BamB  | YP_004552265.1 | pyrrolo-quinoline quinone repeat-containing protein                         |
| Sphingobium chlorophenicum L-1 | 3.30E-008 | BamB  | YP_004552804.1 | PQQ-dependent dehydrogenase methanol/ethanol family protein                 |
| Sphingobium chlorophenicum L-1 | 8.30E-008 | BamB  | YP_004552793.1 | alcohol dehydrogenase (acceptor)                                            |
| Sphingobium chlorophenicum L-1 | 4.70E-006 | BamB  | YP_004554303.1 | PQQ-dependent dehydrogenase methanol/ethanol family protein                 |

## alpha\_e-5

|                                |           |       |                |                                                                               |
|--------------------------------|-----------|-------|----------------|-------------------------------------------------------------------------------|
| Sphingobium chlorophenicum L-1 | 2.40E-005 | BamB  | YP_004555392.1 | glucose/quininate/shikimate family membrane-bound PQQ-dependent dehydrogenase |
| Sphingobium chlorophenicum L-1 | 4.80E-005 | BamB  | YP_004555381.1 | glucose/quininate/shikimate family membrane-bound PQQ-dependent dehydrogenase |
| Sphingobium chlorophenicum L-1 | 2.70E-019 | BamD  | YP_004553440.1 | outer membrane assembly lipoprotein YfiO                                      |
| Sphingobium chlorophenicum L-1 | 3.10E-015 | BamE  | YP_004554342.1 | SmpA/OmlA domain-containing protein                                           |
| Sphingobium chlorophenicum L-1 | 8.80E-005 | BamE  | YP_004554582.1 | putative lipoprotein                                                          |
| Sphingobium chlorophenicum L-1 | 1.80E-120 | Omp85 | YP_004553525.1 | outer membrane protein assembly complex YaeT protein                          |
| Sphingobium chlorophenicum L-1 | 2.10E-007 | Omp85 | YP_004552458.1 | surface antigen (D15)                                                         |
| Sphingobium chlorophenicum L-1 | 2.60E-006 | Omp85 | YP_004553975.1 | surface antigen (D15)                                                         |
| Sphingobium japonicum UT26S    | 1.40E-066 | BamB  | YP_003545944.1 | putative PQQ enzyme                                                           |
| Sphingobium japonicum UT26S    | 4.00E-009 | BamB  | YP_003543647.1 | alcohol dehydrogenase large subunit                                           |
| Sphingobium japonicum UT26S    | 5.60E-007 | BamB  | YP_003543653.1 | quinohemoprotein alcohol dehydrogenase                                        |
| Sphingobium japonicum UT26S    | 1.30E-007 | BamB  | YP_003559668.1 | putative PQQ-linked alcohol dehydrogenase                                     |
| Sphingobium japonicum UT26S    | 1.30E-007 | BamB  | YP_003559495.1 | putative alcohol dehydrogenase                                                |
| Sphingobium japonicum UT26S    | 4.20E-006 | BamB  | YP_003559193.1 | quinoprotein glucose dehydrogenase                                            |
| Sphingobium japonicum UT26S    | 3.60E-005 | BamB  | YP_003559189.1 | glucose dehydrogenase                                                         |
| Sphingobium japonicum UT26S    | 9.50E-020 | BamD  | YP_003545074.1 | putative lipoprotein                                                          |
| Sphingobium japonicum UT26S    | 5.90E-015 | BamE  | YP_003546914.1 | putative small protein A                                                      |
| Sphingobium japonicum UT26S    | 2.30E-123 | Omp85 | YP_003545854.1 | outer membrane protein YaeT                                                   |
| Sphingobium japonicum UT26S    | 2.30E-007 | Omp85 | YP_003544724.1 | outer membrane protein YtfM                                                   |
| Sphingobium japonicum UT26S    | 9.90E-007 | Omp85 | YP_003546660.1 | putative outer membrane protein                                               |
| Sphingomonas wittichii RW1     | 2.30E-007 | BamB  | YP_001260014.1 | Pyrrolo-quinoline quinone                                                     |
| Sphingomonas wittichii RW1     | 2.10E-071 | BamB  | YP_001263612.1 | pyrrolo-quinoline quinone                                                     |
| Sphingomonas wittichii RW1     | 7.80E-010 | BamB  | YP_001261506.1 | pyrrolo-quinoline quinone                                                     |
| Sphingomonas wittichii RW1     | 2.00E-008 | BamB  | YP_001261198.1 | pyrrolo-quinoline quinone                                                     |
| Sphingomonas wittichii RW1     | 2.00E-007 | BamB  | YP_001264638.1 | pyrrolo-quinoline quinone                                                     |
| Sphingomonas wittichii RW1     | 2.10E-007 | BamB  | YP_001261226.1 | pyrrolo-quinoline quinone                                                     |
| Sphingomonas wittichii RW1     | 6.10E-007 | BamB  | YP_001262724.1 | pyrrolo-quinoline quinone                                                     |
| Sphingomonas wittichii RW1     | 1.00E-006 | BamB  | YP_001261826.1 | pyrrolo-quinoline quinone                                                     |
| Sphingomonas wittichii RW1     | 3.80E-006 | BamB  | YP_001261943.1 | pyrrolo-quinoline quinone                                                     |
| Sphingomonas wittichii RW1     | 7.40E-006 | BamB  | YP_001262398.1 | quinoprotein glucose dehydrogenase                                            |
| Sphingomonas wittichii RW1     | 9.30E-006 | BamB  | YP_001264733.1 | pyrrolo-quinoline quinone                                                     |
| Sphingomonas wittichii RW1     | 4.80E-005 | BamB  | YP_001262521.1 | quinoprotein glucose dehydrogenase                                            |
| Sphingomonas wittichii RW1     | 2.20E-019 | BamD  | YP_001261959.1 | DNA uptake lipoprotein-like protein                                           |
| Sphingomonas wittichii RW1     | 1.70E-016 | BamE  | YP_001262429.1 | SmpA/OmlA domain-containing protein                                           |
| Sphingomonas wittichii RW1     | 7.00E-106 | Omp85 | YP_001260974.1 | surface antigen (D15)                                                         |
| Sphingomonas wittichii RW1     | 1.20E-007 | Omp85 | YP_001265302.1 | surface antigen (D15)                                                         |
| Sphingopyxis alaskensis RB2256 | 2.60E-066 | BamB  | YP_617246.1    | Pyrrolo-quinoline quinone                                                     |
| Sphingopyxis alaskensis RB2256 | 3.10E-008 | BamB  | YP_615435.1    | Pyrrolo-quinoline quinone                                                     |
| Sphingopyxis alaskensis RB2256 | 1.90E-020 | BamD  | YP_615599.1    | DNA uptake lipoprotein                                                        |



## alpha\_e-5

|                                                      |           |       |                |                                                       |
|------------------------------------------------------|-----------|-------|----------------|-------------------------------------------------------|
| Sphingopyxis alaskensis RB2256                       | 1.90E-012 | BamE  | YP_617831.1    | tmRNA-binding small protein A                         |
| Sphingopyxis alaskensis RB2256                       | 2.50E-116 | Omp85 | YP_616997.1    | surface antigen (D15)                                 |
| Sphingopyxis alaskensis RB2256                       | 4.30E-007 | Omp85 | YP_616608.1    | surface antigen (D15)                                 |
| Starkeya novella DSM 506                             | 3.20E-006 | BamB  | YP_003696076.1 | PQQ-dependent dehydrogenase                           |
| Starkeya novella DSM 506                             | 7.00E-018 | BamD  | YP_003695029.1 | outer membrane assembly lipoprotein YfiO              |
| Starkeya novella DSM 506                             | 1.40E-005 | BamD  | YP_003694931.1 | tol-pal system protein YbgF                           |
| Starkeya novella DSM 506                             | 2.80E-027 | BamE  | YP_003693585.1 | SmpA/OmlA domain-containing protein                   |
| Starkeya novella DSM 506                             | 1.20E-123 | Omp85 | YP_003693754.1 | outer membrane protein assembly complex, YaeT protein |
| Starkeya novella DSM 506                             | 6.80E-007 | Omp85 | YP_003692773.1 | surface antigen (D15)                                 |
| Wolbachia endosymbiont of Culex quinquefasciatus Pel | 4.40E-013 | BamB  | YP_001974919.1 | PQQ enzyme repeat family protein                      |
| Wolbachia endosymbiont of Culex quinquefasciatus Pel | 1.20E-010 | BamD  | YP_001975948.1 | competence lipoprotein ComL, putative                 |
| Wolbachia endosymbiont of Culex quinquefasciatus Pel | 1.20E-010 | BamE  | YP_001974855.1 | Putative lipoprotein                                  |
| Wolbachia endosymbiont of Culex quinquefasciatus Pel | 3.20E-031 | Omp85 | YP_001975782.1 | surface antigen                                       |
| Wolbachia endosymbiont of Drosophila melanogaster    | 3.50E-013 | BamB  | NP_966506.1    | PQQ repeat-containing protein                         |
| Wolbachia endosymbiont of Drosophila melanogaster    | 2.00E-011 | BamD  | NP_966268.1    | competence lipoprotein ComL, putative                 |
| Wolbachia endosymbiont of Drosophila melanogaster    | 2.50E-011 | BamE  | NP_966024.1    | putative lipoprotein                                  |
| Wolbachia endosymbiont of Drosophila melanogaster    | 6.20E-046 | Omp85 | NP_966806.1    | surface antigen                                       |
| Wolbachia endosymbiont strain TRS of Brugia malayi   | 4.40E-013 | BamD  | YP_198501.1    | DNA uptake lipoprotein                                |
| Wolbachia endosymbiont strain TRS of Brugia malayi   | 8.80E-010 | BamE  | YP_198099.1    | small protein A, tmRNA-binding                        |
| Wolbachia endosymbiont strain TRS of Brugia malayi   | 9.70E-034 | Omp85 | YP_197888.1    | Outer membrane protein/protective antigen OMA87       |
| Wolbachia sp. wRi                                    | 2.80E-013 | BamB  | YP_002727270.1 | PQQ enzyme repeat family protein                      |
| Wolbachia sp. wRi                                    | 5.00E-009 | BamB  | YP_002727727.1 | PQQ enzyme repeat family protein                      |
| Wolbachia sp. wRi                                    | 1.20E-010 | BamD  | YP_002726874.1 | competence lipoprotein ComL, putative                 |
| Wolbachia sp. wRi                                    | 2.50E-011 | BamE  | YP_002726828.1 | small protein A, tmRNA-binding                        |
| Wolbachia sp. wRi                                    | 5.90E-049 | Omp85 | YP_002727606.1 | surface antigen                                       |
| Xanthobacter autotrophicus Py2                       | 3.50E-005 | BamB  | YP_001419563.1 | Pyrrolo-quinoline quinone                             |
| Xanthobacter autotrophicus Py2                       | 5.50E-005 | BamB  | YP_001416683.1 | Pyrrolo-quinoline quinone                             |
| Xanthobacter autotrophicus Py2                       | 2.00E-017 | BamD  | YP_001415245.1 | putative lipoprotein                                  |
| Xanthobacter autotrophicus Py2                       | 1.80E-030 | BamE  | YP_001419259.1 | SmpA/OmlA domain-containing protein                   |
| Xanthobacter autotrophicus Py2                       | 8.40E-115 | Omp85 | YP_001419309.1 | surface antigen (D15)                                 |
| Xanthobacter autotrophicus Py2                       | 1.00E-006 | Omp85 | YP_001419102.1 | surface antigen (D15)                                 |
| Zymomonas mobilis subsp. mobilis NCIMB 11163         | 4.40E-047 | BamB  | YP_003225928.1 | pyrrolo-quinoline quinone                             |
| Zymomonas mobilis subsp. mobilis NCIMB 11163         | 3.00E-018 | BamD  | YP_003226588.1 | outer membrane assembly lipoprotein YfiO              |
| Zymomonas mobilis subsp. mobilis NCIMB 11163         | 1.10E-015 | BamE  | YP_003226362.1 | SmpA/OmlA domain-containing protein                   |
| Zymomonas mobilis subsp. mobilis NCIMB 11163         | 1.80E-135 | Omp85 | YP_003225316.1 | outer membrane protein assembly complex, YaeT protein |
| Zymomonas mobilis subsp. mobilis NCIMB 11163         | 5.70E-007 | Omp85 | YP_003225292.1 | surface antigen (D15)                                 |
| Zymomonas mobilis subsp. mobilis NCIMB 11163         | 1.70E-006 | Omp85 | YP_003225889.1 | surface antigen (D15)                                 |

## beta\_e-5

|                                            |           |       |                |                                                           |
|--------------------------------------------|-----------|-------|----------------|-----------------------------------------------------------|
| Achromobacter xylosoxidans A8              | 3.10E-092 | BamB  | YP_003978215.1 | outer membrane assembly lipoprotein YfgL                  |
| Achromobacter xylosoxidans A8              | 3.80E-007 | BamC  | YP_003980625.1 | NlpBDapX lipoprotein                                      |
| Achromobacter xylosoxidans A8              | 4.00E-094 | BamD  | YP_003977715.1 | competence lipoprotein ComL                               |
| Achromobacter xylosoxidans A8              | 2.30E-017 | BamE  | YP_003977219.1 | outer membrane lipoprotein OmlA domain-containing protein |
| Achromobacter xylosoxidans A8              | 1.30E-005 | BamE  | YP_003980911.1 | hypothetical protein AXYL_04888                           |
| Achromobacter xylosoxidans A8              | 2.60E-182 | Omp85 | YP_003978844.1 | outer membrane protein assembly complex, YaeT protein     |
| Achromobacter xylosoxidans A8              | 6.40E-005 | Omp85 | YP_003981661.1 | surface antigen family protein                            |
| Acidovorax avenae subsp. avenae ATCC 19860 | 3.20E-067 | BamB  | YP_004233955.1 | outer membrane assembly lipoprotein YfgL                  |
| Acidovorax avenae subsp. avenae ATCC 19860 | 4.40E-006 | BamB  | YP_004232962.1 | membrane-bound PQQ-dependent dehydrogenase                |
| Acidovorax avenae subsp. avenae ATCC 19860 | 2.70E-007 | BamC  | YP_004233841.1 | NlpBDapX family lipoprotein                               |
| Acidovorax avenae subsp. avenae ATCC 19860 | 6.00E-084 | BamD  | YP_004234488.1 | outer membrane assembly lipoprotein YfiO                  |
| Acidovorax avenae subsp. avenae ATCC 19860 | 1.90E-010 | BamE  | YP_004236924.1 | SmpA/OmlA domain-containing protein                       |
| Acidovorax avenae subsp. avenae ATCC 19860 | 3.80E-005 | BamE  | YP_004237075.1 | putative lipoprotein transmembrane                        |
| Acidovorax avenae subsp. avenae ATCC 19860 | 2.40E-177 | Omp85 | YP_004234253.1 | outer membrane protein assembly complex, YaeT protein     |
| Acidovorax avenae subsp. avenae ATCC 19860 | 2.60E-005 | Omp85 | YP_004236311.1 | surface antigen (D15)                                     |
| Acidovorax citrulli AAC00-1                | 1.10E-066 | BamB  | YP_969792.1    | Pyrrolo-quinoline quinone                                 |
| Acidovorax citrulli AAC00-1                | 9.30E-006 | BamB  | YP_968792.1    | quinoprotein glucose dehydrogenase                        |
| Acidovorax citrulli AAC00-1                | 5.60E-008 | BamC  | YP_969701.1    | NlpB/DapX family lipoprotein                              |
| Acidovorax citrulli AAC00-1                | 4.60E-083 | BamD  | YP_971577.1    | hypothetical protein Aave_3241                            |
| Acidovorax citrulli AAC00-1                | 2.20E-010 | BamE  | YP_972865.1    | SmpA/OmlA domain-containing protein                       |
| Acidovorax citrulli AAC00-1                | 6.10E-005 | BamE  | YP_972998.1    | putative lipoprotein transmembrane                        |
| Acidovorax citrulli AAC00-1                | 4.70E-179 | Omp85 | YP_970189.1    | surface antigen (D15)                                     |
| Acidovorax citrulli AAC00-1                | 3.30E-005 | Omp85 | YP_972272.1    | surface antigen (D15)                                     |
| Acidovorax ebreus TPSY                     | 1.80E-056 | BamB  | YP_002552570.1 | outer membrane assembly lipoprotein yfgl                  |
| Acidovorax ebreus TPSY                     | 8.40E-009 | BamC  | YP_002552401.1 | nlpbdapx family lipoprotein                               |
| Acidovorax ebreus TPSY                     | 6.20E-084 | BamD  | YP_002553356.1 | hypothetical protein Dtpsy_1899                           |
| Acidovorax ebreus TPSY                     | 1.50E-010 | BamE  | YP_002554700.1 | smpa/omla domain-containing protein                       |
| Acidovorax ebreus TPSY                     | 2.20E-174 | Omp85 | YP_002552698.1 | outer membrane protein assembly complex, yaet protein     |
| Acidovorax ebreus TPSY                     | 4.30E-005 | Omp85 | YP_002554317.1 | surface antigen (d15)                                     |
| Acidovorax sp. JS42                        | 1.70E-057 | BamB  | YP_985481.1    | Pyrrolo-quinoline quinone                                 |
| Acidovorax sp. JS42                        | 1.10E-008 | BamC  | YP_985323.1    | NlpB/DapX family lipoprotein                              |
| Acidovorax sp. JS42                        | 6.20E-084 | BamD  | YP_986092.1    | hypothetical protein Ajs_1829                             |
| Acidovorax sp. JS42                        | 1.10E-010 | BamE  | YP_988105.1    | SmpA/OmlA domain-containing protein                       |
| Acidovorax sp. JS42                        | 4.30E-173 | Omp85 | YP_986811.1    | surface antigen (D15)                                     |
| Acidovorax sp. JS42                        | 4.10E-005 | Omp85 | YP_987748.1    | surface antigen (D15)                                     |
| Alicyclophilus denitrificans BC            | 7.70E-054 | BamB  | YP_004127647.1 | outer membrane assembly lipoprotein yfgl                  |
| Alicyclophilus denitrificans BC            | 1.10E-007 | BamC  | YP_004125753.1 | nlpb/dapx family lipoprotein                              |
| Alicyclophilus denitrificans BC            | 5.40E-083 | BamD  | YP_004127282.1 | outer membrane assembly lipoprotein yfio                  |

## beta\_e-5

|                                   |           |       |                |                                                                                            |
|-----------------------------------|-----------|-------|----------------|--------------------------------------------------------------------------------------------|
| Alicyclophilus denitrificans BC   | 9.90E-012 | BamE  | YP_004128711.1 | smpa/omla domain-containing protein                                                        |
| Alicyclophilus denitrificans BC   | 6.20E-005 | BamE  | YP_004126994.1 | trap dicarboxylate transporter, dctp subunit                                               |
| Alicyclophilus denitrificans BC   | 6.70E-005 | BamE  | YP_004128859.1 | lipoprotein transmembrane                                                                  |
| Alicyclophilus denitrificans BC   | 1.80E-174 | Omp85 | YP_004126120.1 | outer membrane protein assembly complex, yaet protein                                      |
| Alicyclophilus denitrificans K601 | 7.70E-054 | BamB  | YP_004387330.1 | outer membrane assembly lipoprotein YfgL                                                   |
| Alicyclophilus denitrificans K601 | 1.10E-007 | BamC  | YP_004389627.1 | NlpBDapX family lipoprotein                                                                |
| Alicyclophilus denitrificans K601 | 5.40E-083 | BamD  | YP_004388882.1 | outer membrane assembly lipoprotein YfiO                                                   |
| Alicyclophilus denitrificans K601 | 9.90E-012 | BamE  | YP_004390293.1 | SmpA/OmlA domain-containing protein                                                        |
| Alicyclophilus denitrificans K601 | 1.80E-174 | Omp85 | YP_004389308.1 | outer membrane protein assembly complex, YaeT protein                                      |
| Alicyclophilus denitrificans K601 | 7.80E-005 | Omp85 | YP_004389750.1 | surface antigen (D15)                                                                      |
| Aromatoleum aromaticum EbN1       | 6.30E-110 | BamB  | YP_157696.1    | putative quinoprotein                                                                      |
| Aromatoleum aromaticum EbN1       | 3.70E-008 | BamC  | YP_157423.1    | hypothetical protein ebA773                                                                |
| Aromatoleum aromaticum EbN1       | 6.80E-105 | BamD  | YP_159693.1    | putative competence lipoprotein precursor                                                  |
| Aromatoleum aromaticum EbN1       | 3.60E-005 | BamE  | YP_159639.1    | hypothetical protein ebB157                                                                |
| Aromatoleum aromaticum EbN1       | 2.40E-229 | Omp85 | YP_160448.1    | outer membrane protein/surface antigen                                                     |
| Aromatoleum aromaticum EbN1       | 1.60E-005 | Omp85 | YP_157653.1    | hypothetical protein ebA1189                                                               |
| Azoarcus sp. BH72                 | 6.50E-108 | BamB  | YP_932434.1    | hypothetical protein azo0930                                                               |
| Azoarcus sp. BH72                 | 3.30E-008 | BamB  | YP_934478.1    | putative quinoprotein ethanol dehydrogenase                                                |
| Azoarcus sp. BH72                 | 2.30E-007 | BamB  | YP_934347.1    | putative quinoprotein ethanol dehydrogenase                                                |
| Azoarcus sp. BH72                 | 2.30E-007 | BamB  | YP_935367.1    | putative quinoprotein ethanol dehydrogenase                                                |
| Azoarcus sp. BH72                 | 6.30E-007 | BamB  | YP_934525.1    | putative quinoprotein ethanol dehydrogenase                                                |
| Azoarcus sp. BH72                 | 6.90E-006 | BamB  | YP_934475.1    | ExaA2 protein                                                                              |
| Azoarcus sp. BH72                 | 6.40E-008 | BamC  | YP_932601.1    | putative lipoprotein                                                                       |
| Azoarcus sp. BH72                 | 2.90E-104 | BamD  | YP_932521.1    | competence lipoprotein                                                                     |
| Azoarcus sp. BH72                 | 1.60E-030 | BamE  | YP_934081.1    | putative outer membrane lipoprotein OmlA                                                   |
| Azoarcus sp. BH72                 | 8.90E-005 | BamE  | YP_933733.1    | hypothetical protein azo2229                                                               |
| Azoarcus sp. BH72                 | 3.30E-230 | Omp85 | YP_933405.1    | outer membrane protein                                                                     |
| Azoarcus sp. BH72                 | 1.10E-005 | Omp85 | YP_932473.1    | outer membrane protein<br>putative PQQ-dependent polyvinyl alcohol dehydrogenase precursor |
| Azoarcus sp. EbN1                 | 1.70E-007 | BamB  | YP_195704.1    | precursor                                                                                  |
| Bordetella avium 197N             | 2.80E-098 | BamB  | YP_786855.1    | lipoprotein                                                                                |
| Bordetella avium 197N             | 1.90E-006 | BamC  | YP_787098.1    | lipoprotein                                                                                |
| Bordetella avium 197N             | 2.60E-098 | BamD  | YP_785740.1    | lipoprotein                                                                                |
| Bordetella avium 197N             | 8.10E-018 | BamE  | YP_787223.1    | outer membrane lipoprotein                                                                 |
| Bordetella avium 197N             | 7.10E-006 | BamE  | YP_784938.1    | hypothetical protein BAV0408                                                               |
| Bordetella avium 197N             | 8.50E-196 | Omp85 | YP_786260.1    | surface antigen                                                                            |
| Bordetella bronchiseptica RB50    | 2.00E-104 | BamB  | NP_889709.1    | quinoprotein                                                                               |
| Bordetella bronchiseptica RB50    | 8.60E-007 | BamC  | NP_888202.1    | lipoprotein                                                                                |

|                                  |           |       |                |                                                       |
|----------------------------------|-----------|-------|----------------|-------------------------------------------------------|
| Bordetella bronchiseptica RB50   | 3.00E-097 | BamD  | NP_890134.1    | competence lipoprotein precursor                      |
| Bordetella bronchiseptica RB50   | 3.50E-014 | BamE  | NP_890477.1    | outer membrane lipoprotein                            |
| Bordetella bronchiseptica RB50   | 7.60E-183 | Omp85 | NP_889150.1    | surface antigen                                       |
| Bordetella parapertussis 12822   | 2.00E-104 | BamB  | NP_885052.1    | quinoprotein                                          |
| Bordetella parapertussis 12822   | 4.50E-007 | BamC  | NP_884508.1    | lipoprotein                                           |
| Bordetella parapertussis 12822   | 3.00E-097 | BamD  | NP_885369.1    | competence lipoprotein precursor                      |
| Bordetella parapertussis 12822   | 3.50E-014 | BamE  | NP_885655.1    | outer membrane lipoprotein                            |
| Bordetella parapertussis 12822   | 3.50E-181 | Omp85 | NP_883825.1    | surface antigen                                       |
| Bordetella pertussis Tohama I    | 2.00E-104 | BamB  | NP_880844.1    | putative quinoprotein                                 |
| Bordetella pertussis Tohama I    | 8.30E-007 | BamC  | NP_880303.1    | putative lipoprotein                                  |
| Bordetella pertussis Tohama I    | 3.00E-097 | BamD  | NP_879922.1    | competence lipoprotein precursor                      |
| Bordetella pertussis Tohama I    | 3.50E-014 | BamE  | NP_881135.1    | outer membrane lipoprotein                            |
| Bordetella pertussis Tohama I    | 3.90E-184 | Omp85 | NP_880169.1    | surface antigen                                       |
| Bordetella petrii DSM 12804      | 1.60E-098 | BamB  | YP_001630631.1 | putative quinoprotein                                 |
| Bordetella petrii DSM 12804      | 2.20E-005 | BamB  | YP_001633262.1 | hypothetical protein Bpet4644                         |
| Bordetella petrii DSM 12804      | 4.40E-007 | BamC  | YP_001632084.1 | putative lipoprotein                                  |
| Bordetella petrii DSM 12804      | 6.00E-081 | BamD  | YP_001630454.1 | competence lipoprotein precursor                      |
| Bordetella petrii DSM 12804      | 3.60E-017 | BamE  | YP_001630156.1 | outer membrane lipoprotein OmlA                       |
| Bordetella petrii DSM 12804      | 7.70E-183 | Omp85 | YP_001631137.1 | outer membrane protein                                |
| Burkholderia ambifaria AMMD      | 4.20E-113 | BamB  | YP_773637.1    | Pyrrolo-quinoline quinone                             |
| Burkholderia ambifaria AMMD      | 7.50E-009 | BamB  | YP_778040.1    | Pyrrolo-quinoline quinone                             |
| Burkholderia ambifaria AMMD      | 2.80E-007 | BamC  | YP_774021.1    | NlpB/DapX family lipoprotein                          |
| Burkholderia ambifaria AMMD      | 4.50E-007 | BamC  | YP_773261.1    | hypothetical protein Bamb_1369                        |
| Burkholderia ambifaria AMMD      | 1.30E-086 | BamD  | YP_773622.1    | competence lipoprotein ComL                           |
| Burkholderia ambifaria AMMD      | 9.00E-024 | BamE  | YP_772438.1    | SmpA/OmlA domain-containing protein                   |
| Burkholderia ambifaria AMMD      | 2.40E-005 | BamE  | YP_778122.1    | OmpA/MotB domain-containing protein                   |
| Burkholderia ambifaria AMMD      | 9.10E-213 | Omp85 | YP_773934.1    | surface antigen (D15)                                 |
| Burkholderia ambifaria AMMD      | 3.10E-006 | Omp85 | YP_774376.1    | surface antigen (D15)                                 |
| Burkholderia ambifaria MC40-6    | 9.60E-098 | BamB  | YP_001808421.1 | outer membrane assembly lipoprotein YfgL              |
| Burkholderia ambifaria MC40-6    | 1.50E-008 | BamB  | YP_001815885.1 | methanol/ethanol family PQQ-dependent dehydrogenase   |
| Burkholderia ambifaria MC40-6    | 2.80E-007 | BamC  | YP_001808701.1 | NlpB/DapX family lipoprotein                          |
| Burkholderia ambifaria MC40-6    | 5.10E-007 | BamC  | YP_001808113.1 | hypothetical protein BamMC406_1409                    |
| Burkholderia ambifaria MC40-6    | 1.30E-086 | BamD  | YP_001808406.1 | competence lipoprotein ComL                           |
| Burkholderia ambifaria MC40-6    | 9.00E-024 | BamE  | YP_001807284.1 | SmpA/OmlA domain-containing protein                   |
| Burkholderia ambifaria MC40-6    | 1.60E-212 | Omp85 | YP_001808611.1 | outer membrane protein assembly complex, YaeT protein |
| Burkholderia ambifaria MC40-6    | 3.10E-006 | Omp85 | YP_001809048.1 | surface antigen (D15)                                 |
| Burkholderia cenocepacia AU 1054 | 3.60E-008 | BamB  | YP_623110.1    | Pyrrolo-quinoline quinone                             |
| Burkholderia cenocepacia AU 1054 | 3.40E-115 | BamB  | YP_626107.1    | Pyrrolo-quinoline quinone                             |

|                                  |           |       |                |                                                       |
|----------------------------------|-----------|-------|----------------|-------------------------------------------------------|
| Burkholderia cenocepacia AU 1054 | 4.80E-007 | BamC  | YP_620886.1    | uncharacterized lipoprotein-like                      |
| Burkholderia cenocepacia AU 1054 | 6.60E-007 | BamC  | YP_625821.1    | uncharacterized lipoprotein                           |
| Burkholderia cenocepacia AU 1054 | 2.00E-085 | BamD  | YP_626121.1    | DNA uptake lipoprotein-like                           |
| Burkholderia cenocepacia AU 1054 | 4.40E-024 | BamE  | YP_620054.1    | SmpA/OmlA                                             |
| Burkholderia cenocepacia AU 1054 | 5.80E-006 | Omp85 | YP_621704.1    | surface antigen (D15)                                 |
| Burkholderia cenocepacia AU 1054 | 2.90E-214 | Omp85 | YP_625904.1    | surface antigen (D15)                                 |
| Burkholderia cenocepacia HI2424  | 3.40E-115 | BamB  | YP_835453.1    | Pyrrolo-quinoline quinone                             |
| Burkholderia cenocepacia HI2424  | 3.60E-008 | BamB  | YP_838752.1    | Pyrrolo-quinoline quinone                             |
| Burkholderia cenocepacia HI2424  | 4.80E-007 | BamC  | YP_835131.1    | lipoprotein-like protein                              |
| Burkholderia cenocepacia HI2424  | 6.60E-007 | BamC  | YP_835738.1    | lipoprotein                                           |
| Burkholderia cenocepacia HI2424  | 2.00E-085 | BamD  | YP_835438.1    | DNA uptake lipoprotein-like protein                   |
| Burkholderia cenocepacia HI2424  | 4.40E-024 | BamE  | YP_834296.1    | SmpA/OmlA domain-containing protein                   |
| Burkholderia cenocepacia HI2424  | 2.00E-007 | BamE  | YP_840443.1    | lipoprotein                                           |
| Burkholderia cenocepacia HI2424  | 2.90E-214 | Omp85 | YP_835655.1    | surface antigen (D15)                                 |
| Burkholderia cenocepacia HI2424  | 5.80E-006 | Omp85 | YP_836082.1    | surface antigen (D15)                                 |
| Burkholderia cenocepacia J2315   | 3.90E-115 | BamB  | YP_002231008.1 | putative lipoprotein                                  |
| Burkholderia cenocepacia J2315   | 1.70E-008 | BamB  | YP_002234969.1 | putative quinoprotein ethanol dehydrogenase precursor |
| Burkholderia cenocepacia J2315   | 5.70E-007 | BamC  | YP_002230623.1 | hypothetical protein BCAL1493                         |
| Burkholderia cenocepacia J2315   | 8.50E-007 | BamC  | YP_002231293.1 | putative lipoprotein                                  |
| Burkholderia cenocepacia J2315   | 7.20E-086 | BamD  | YP_002230993.1 | putative lipoprotein                                  |
| Burkholderia cenocepacia J2315   | 1.10E-024 | BamE  | YP_002232479.1 | putative outer membrane protein                       |
| Burkholderia cenocepacia J2315   | 2.80E-006 | BamE  | YP_002232189.1 | putative lipoprotein                                  |
| Burkholderia cenocepacia J2315   | 1.00E-006 | BamE  | YP_002233733.1 | SmpA/OmlA family lipoprotein                          |
| Burkholderia cenocepacia J2315   | 5.10E-214 | Omp85 | YP_002231209.1 | outer membrane protein assembly factor YaeT           |
| Burkholderia cenocepacia J2315   | 6.10E-006 | Omp85 | YP_002231752.1 | putative outer membrane protein                       |
| Burkholderia cenocepacia MC0-3   | 1.40E-115 | BamB  | YP_001765116.1 | outer membrane assembly lipoprotein YfgL              |
| Burkholderia cenocepacia MC0-3   | 4.30E-008 | BamB  | YP_001778774.1 | methanol/ethanol family PQQ-dependent dehydrogenase   |
| Burkholderia cenocepacia MC0-3   | 4.80E-007 | BamC  | YP_001764759.1 | lipoprotein-like protein                              |
| Burkholderia cenocepacia MC0-3   | 6.60E-007 | BamC  | YP_001765395.1 | lipoprotein                                           |
| Burkholderia cenocepacia MC0-3   | 2.00E-085 | BamD  | YP_001765101.1 | DNA uptake lipoprotein-like protein                   |
| Burkholderia cenocepacia MC0-3   | 4.40E-024 | BamE  | YP_001763917.1 | SmpA/OmlA domain-containing protein                   |
| Burkholderia cenocepacia MC0-3   | 4.00E-213 | Omp85 | YP_001765314.1 | outer membrane protein assembly complex, YaeT protein |
| Burkholderia cenocepacia MC0-3   | 5.80E-006 | Omp85 | YP_001765727.1 | surface antigen (D15)                                 |
| Burkholderia gladioli BSR3       | 8.10E-116 | BamB  | YP_004360869.1 | hypothetical protein bgla_1g22860                     |
| Burkholderia gladioli BSR3       | 2.50E-006 | BamC  | YP_004360386.1 | Putative lipoprotein                                  |
| Burkholderia gladioli BSR3       | 6.30E-006 | BamC  | YP_004361334.1 | Putative lipoprotein                                  |
| Burkholderia gladioli BSR3       | 7.90E-086 | BamD  | YP_004360854.1 | Putative competence lipoprotein ComL                  |
| Burkholderia gladioli BSR3       | 2.50E-007 | BamE  | YP_004350932.1 | lipoprotein                                           |

## beta\_e-5

|                                |           |       |                |                                                  |
|--------------------------------|-----------|-------|----------------|--------------------------------------------------|
| Burkholderia gladioli BSR3     | 5.40E-005 | BamE  | YP_004351100.1 | hypothetical protein bgla_3p0760                 |
| Burkholderia gladioli BSR3     | 2.70E-025 | BamE  | YP_004359228.1 | Outer membrane lipoprotein, SmpA/OmlA            |
| Burkholderia gladioli BSR3     | 1.90E-201 | Omp85 | YP_004350514.1 | putative outer membrane antigen                  |
| Burkholderia gladioli BSR3     | 8.40E-208 | Omp85 | YP_004361136.1 | Outer membrane protein, OMP85 family protein     |
| Burkholderia gladioli BSR3     | 2.50E-006 | Omp85 | YP_004361695.1 | outer membrane protein, OMP85 family             |
| Burkholderia glumae BGR1       | 1.10E-118 | BamB  | YP_002911305.1 | PQQ enzyme repeat-containing protein             |
| Burkholderia glumae BGR1       | 3.80E-006 | BamC  | YP_002911829.1 | lipoprotein                                      |
| Burkholderia glumae BGR1       | 4.00E-005 | BamC  | YP_002912220.1 | NlpBDapX family lipoprotei                       |
| Burkholderia glumae BGR1       | 2.80E-084 | BamD  | YP_002911320.1 | competence lipoprotein ComL                      |
| Burkholderia glumae BGR1       | 2.90E-007 | BamE  | YP_002907639.1 | Hypothetical protein bglu_3p0120                 |
| Burkholderia glumae BGR1       | 9.70E-026 | BamE  | YP_002910442.1 | outer membrane lipoprotein, SmpA/OmlA            |
| Burkholderia glumae BGR1       | 2.90E-007 | BamE  | YP_002913216.1 | hypothetical protein bglu_4p0150                 |
| Burkholderia glumae BGR1       | 3.70E-205 | Omp85 | YP_002911142.1 | OMP85 family outer membrane protein              |
| Burkholderia glumae BGR1       | 5.70E-006 | Omp85 | YP_002912575.1 | OMP85 family outer membrane protein              |
| Burkholderia mallei ATCC 23344 | 1.10E-115 | BamB  | YP_103002.1    | lipoprotein                                      |
| Burkholderia mallei ATCC 23344 | 1.40E-006 | BamC  | YP_102773.1    | lipoprotein                                      |
| Burkholderia mallei ATCC 23344 | 2.70E-006 | BamC  | YP_103297.1    | lipoprotein                                      |
| Burkholderia mallei ATCC 23344 | 6.10E-087 | BamD  | YP_102985.1    | competence lipoprotein ComL                      |
| Burkholderia mallei ATCC 23344 | 2.00E-024 | BamE  | YP_104004.1    | outer membrane lipoprotein, putative             |
| Burkholderia mallei ATCC 23344 | 9.60E-006 | BamE  | YP_105939.1    | OmpA/SmpA/OmlA family outer membrane lipoprotein |
| Burkholderia mallei ATCC 23344 | 1.60E-212 | Omp85 | YP_103187.1    | OMP85 family outer membrane protein              |
| Burkholderia mallei ATCC 23344 | 3.50E-006 | Omp85 | YP_102475.1    | OMP85 family outer membrane protein              |
| Burkholderia mallei NCTC 10229 | 4.80E-116 | BamB  | YP_001026074.1 | putative lipoprotein                             |
| Burkholderia mallei NCTC 10229 | 1.40E-006 | BamC  | YP_001026194.1 | putative lipoprotein                             |
| Burkholderia mallei NCTC 10229 | 2.70E-006 | BamC  | YP_001029079.1 | putative lipoprotein                             |
| Burkholderia mallei NCTC 10229 | 6.10E-087 | BamD  | YP_001026091.1 | competence lipoprotein ComL                      |
| Burkholderia mallei NCTC 10229 | 5.10E-006 | BamE  | YP_001024397.1 | OmpA/SmpA/OmlA family outer membrane lipoprotein |
| Burkholderia mallei NCTC 10229 | 2.00E-024 | BamE  | YP_001027217.1 | SmpA/OmlA family lipoprotein                     |
| Burkholderia mallei NCTC 10229 | 2.90E-211 | Omp85 | YP_001029200.1 | OMP85 family outer membrane protein              |
| Burkholderia mallei NCTC 10229 | 7.80E-006 | Omp85 | YP_001028922.1 | OMP85 family outer membrane protein              |
| Burkholderia mallei NCTC 10247 | 4.80E-116 | BamB  | YP_001080658.1 | putative lipoprotein                             |
| Burkholderia mallei NCTC 10247 | 1.40E-006 | BamC  | YP_001080536.1 | putative lipoprotein                             |
| Burkholderia mallei NCTC 10247 | 2.70E-006 | BamC  | YP_001080999.1 | putative lipoprotein                             |
| Burkholderia mallei NCTC 10247 | 6.10E-087 | BamD  | YP_001080639.1 | competence lipoprotein ComL                      |
| Burkholderia mallei NCTC 10247 | 5.10E-006 | BamE  | YP_001078178.1 | OmpA/SmpA/OmlA family outer membrane lipoprotein |
| Burkholderia mallei NCTC 10247 | 2.00E-024 | BamE  | YP_001082169.1 | SmpA/OmlA family lipoprotein                     |
| Burkholderia mallei NCTC 10247 | 2.90E-211 | Omp85 | YP_001080870.1 | OMP85 family outer membrane protein              |
| Burkholderia mallei NCTC 10247 | 7.80E-006 | Omp85 | YP_001081165.1 | OMP85 family outer membrane protein              |

## beta\_e-5

|                                     |           |       |                |                                                       |
|-------------------------------------|-----------|-------|----------------|-------------------------------------------------------|
| Burkholderia mallei SAVP1           | 4.80E-116 | BamB  | YP_993151.1    | putative lipoprotein                                  |
| Burkholderia mallei SAVP1           | 1.40E-006 | BamC  | YP_992852.1    | putative lipoprotein                                  |
| Burkholderia mallei SAVP1           | 2.70E-006 | BamC  | YP_993491.1    | putative lipoprotein                                  |
| Burkholderia mallei SAVP1           | 6.10E-087 | BamD  | YP_993133.1    | competence lipoprotein ComL                           |
| Burkholderia mallei SAVP1           | 5.10E-006 | BamE  | YP_989916.1    | OmpA/SmpA/OmlA family outer membrane lipoprotein      |
| Burkholderia mallei SAVP1           | 2.00E-024 | BamE  | YP_991724.1    | SmpA/OmlA family lipoprotein                          |
| Burkholderia mallei SAVP1           | 2.90E-211 | Omp85 | YP_993363.1    | OMP85 family outer membrane protein                   |
| Burkholderia mallei SAVP1           | 7.80E-006 | Omp85 | YP_993617.1    | OMP85 family outer membrane protein                   |
| Burkholderia multivorans ATCC 17616 | 6.80E-118 | BamB  | YP_001579651.1 | outer membrane assembly lipoprotein YfgL              |
| Burkholderia multivorans ATCC 17616 | 1.70E-008 | BamB  | YP_001585922.1 | methanol/ethanol family PQQ-dependent dehydrogenase   |
| Burkholderia multivorans ATCC 17616 | 1.70E-008 | BamB  | YP_001941374.1 | putative glucose dehydrogenase                        |
| Burkholderia multivorans ATCC 17616 | 6.80E-118 | BamB  | YP_001946233.1 | putative lipoprotein                                  |
| Burkholderia multivorans ATCC 17616 | 4.90E-007 | BamC  | YP_001579367.1 | lipoprotein                                           |
| Burkholderia multivorans ATCC 17616 | 1.80E-006 | BamC  | YP_001579955.1 | lipoprotein                                           |
| Burkholderia multivorans ATCC 17616 | 4.90E-007 | BamC  | YP_001946519.1 | lipoprotein-34                                        |
| Burkholderia multivorans ATCC 17616 | 1.80E-006 | BamC  | YP_001945937.1 | lipoprotein-34                                        |
| Burkholderia multivorans ATCC 17616 | 6.60E-089 | BamD  | YP_001579665.1 | competence lipoprotein ComL                           |
| Burkholderia multivorans ATCC 17616 | 6.60E-089 | BamD  | YP_001946218.1 | putative lipoprotein                                  |
| Burkholderia multivorans ATCC 17616 | 1.90E-025 | BamE  | YP_001580917.1 | SmpA/OmlA domain-containing protein                   |
| Burkholderia multivorans ATCC 17616 | 7.40E-007 | BamE  | YP_001580650.1 | putative lipoprotein                                  |
| Burkholderia multivorans ATCC 17616 | 3.40E-005 | BamE  | YP_001583501.1 | OmpA/MotB domain-containing protein                   |
| Burkholderia multivorans ATCC 17616 | 1.90E-025 | BamE  | YP_001945004.1 | small protein A                                       |
| Burkholderia multivorans ATCC 17616 | 3.40E-005 | BamE  | YP_001949374.1 | putative OmpA family transmembrane protein            |
| Burkholderia multivorans ATCC 17616 | 4.30E-216 | Omp85 | YP_001579450.1 | outer membrane protein assembly complex, YaeT protein |
| Burkholderia multivorans ATCC 17616 | 3.50E-006 | Omp85 | YP_001579046.1 | surface antigen (D15)                                 |
| Burkholderia multivorans ATCC 17616 | 4.30E-216 | Omp85 | YP_001946435.1 | outer membrane protein                                |
| Burkholderia multivorans ATCC 17616 | 3.50E-006 | Omp85 | YP_001946833.1 | outer membrane protein                                |
| Burkholderia phymatum STM815        | 3.30E-121 | BamB  | YP_001857645.1 | outer membrane assembly lipoprotein YfgL              |
| Burkholderia phymatum STM815        | 5.60E-009 | BamB  | YP_001863238.1 | methanol/ethanol family PQQ-dependent dehydrogenase   |
| Burkholderia phymatum STM815        | 3.80E-005 | BamB  | YP_001862554.1 | methanol/ethanol family PQQ-dependent dehydrogenase   |
| Burkholderia phymatum STM815        | 8.00E-007 | BamC  | YP_001857654.1 | putative lipoprotein                                  |
| Burkholderia phymatum STM815        | 1.40E-005 | BamC  | YP_001857751.1 | putative exported lipoprotein                         |
| Burkholderia phymatum STM815        | 7.80E-086 | BamD  | YP_001857201.1 | putative competence lipoprotein, ComL                 |
| Burkholderia phymatum STM815        | 6.10E-024 | BamE  | YP_001858810.1 | SmpA/OmlA domain-containing protein                   |
| Burkholderia phymatum STM815        | 9.70E-005 | BamE  | YP_001856468.1 | hypothetical protein Bphy_0229                        |
| Burkholderia phymatum STM815        | 3.40E-211 | Omp85 | YP_001857558.1 | outer membrane protein assembly complex, YaeT protein |
| Burkholderia phymatum STM815        | 6.50E-006 | Omp85 | YP_001858415.1 | surface antigen (D15)                                 |
| Burkholderia phymatum STM815        | 1.30E-195 | Omp85 | YP_001859680.1 | outer membrane protein assembly complex, YaeT protein |

|                                  |           |       |                |                                                       |
|----------------------------------|-----------|-------|----------------|-------------------------------------------------------|
| Burkholderia phytofirmans PsJN   | 1.30E-122 | BamB  | YP_001896157.1 | outer membrane assembly lipoprotein YfgL              |
| Burkholderia phytofirmans PsJN   | 6.00E-007 | BamC  | YP_001896166.1 | lipoprotein                                           |
| Burkholderia phytofirmans PsJN   | 5.50E-006 | BamC  | YP_001896295.1 | exported lipoprotein                                  |
| Burkholderia phytofirmans PsJN   | 1.00E-089 | BamD  | YP_001895472.1 | outer membrane assembly lipoprotein YfiO              |
| Burkholderia phytofirmans PsJN   | 7.40E-005 | BamD  | YP_001894404.1 | tol-pal system protein YbgF                           |
| Burkholderia phytofirmans PsJN   | 2.90E-019 | BamE  | YP_001896999.1 | SmpA/OmlA domain-containing protein                   |
| Burkholderia phytofirmans PsJN   | 9.60E-210 | Omp85 | YP_001896067.1 | outer membrane protein assembly complex, YaeT protein |
| Burkholderia phytofirmans PsJN   | 7.00E-205 | Omp85 | YP_001895743.1 | outer membrane protein assembly complex, YaeT protein |
| Burkholderia phytofirmans PsJN   | 7.00E-006 | Omp85 | YP_001894656.1 | surface antigen (D15)                                 |
| Burkholderia pseudomallei 1106a  | 2.90E-117 | BamB  | YP_001066489.1 | PQQ repeat-containing protein                         |
| Burkholderia pseudomallei 1106a  | 1.50E-006 | BamC  | YP_001066018.1 | putative lipoprotein                                  |
| Burkholderia pseudomallei 1106a  | 1.70E-006 | BamC  | YP_001066871.1 | putative lipoprotein                                  |
| Burkholderia pseudomallei 1106a  | 4.30E-087 | BamD  | YP_001066470.1 | putative competence lipoprotein ComL                  |
| Burkholderia pseudomallei 1106a  | 2.00E-024 | BamE  | YP_001067691.1 | SmpA/OmlA family lipoprotein                          |
| Burkholderia pseudomallei 1106a  | 5.10E-006 | BamE  | YP_001075283.1 | ompA family protein                                   |
| Burkholderia pseudomallei 1106a  | 6.50E-211 | Omp85 | YP_001066743.1 | OMP85 family outer membrane protein                   |
| Burkholderia pseudomallei 1106a  | 2.70E-006 | Omp85 | YP_001065333.1 | OMP85 family outer membrane protein                   |
| Burkholderia pseudomallei 1710b  | 2.90E-117 | BamB  | YP_333746.1    | PQQ repeat-containing protein                         |
| Burkholderia pseudomallei 1710b  | 1.50E-006 | BamC  | YP_333304.1    | hypothetical protein BURPS1710b_1905                  |
| Burkholderia pseudomallei 1710b  | 1.70E-006 | BamC  | YP_334084.1    | putative lipoprotein                                  |
| Burkholderia pseudomallei 1710b  | 4.30E-087 | BamD  | YP_333729.1    | competence lipoprotein ComL                           |
| Burkholderia pseudomallei 1710b  | 3.30E-017 | BamE  | YP_334827.1    | outer membrane lipoprotein                            |
| Burkholderia pseudomallei 1710b  | 2.50E-212 | Omp85 | YP_333967.1    | OMP85 family outer membrane protein                   |
| Burkholderia pseudomallei 1710b  | 1.00E-005 | Omp85 | YP_332617.1    | OMP85 family outer membrane protein                   |
| Burkholderia pseudomallei 668    | 3.70E-117 | BamB  | YP_001059222.1 | PQQ repeat-containing protein                         |
| Burkholderia pseudomallei 668    | 1.50E-006 | BamC  | YP_001058765.1 | putative lipoprotein                                  |
| Burkholderia pseudomallei 668    | 1.70E-006 | BamC  | YP_001059590.1 | putative lipoprotein                                  |
| Burkholderia pseudomallei 668    | 6.30E-087 | BamD  | YP_001059204.1 | putative competence lipoprotein ComL                  |
| Burkholderia pseudomallei 668    | 2.00E-024 | BamE  | YP_001060430.1 | SmpA/OmlA family lipoprotein                          |
| Burkholderia pseudomallei 668    | 5.10E-006 | BamE  | YP_001062318.1 | ompA family protein                                   |
| Burkholderia pseudomallei 668    | 2.50E-212 | Omp85 | YP_001059460.1 | OMP85 family outer membrane protein                   |
| Burkholderia pseudomallei 668    | 2.80E-006 | Omp85 | YP_001058096.2 | OMP85 family outer membrane protein                   |
| Burkholderia pseudomallei K96243 | 4.80E-116 | BamB  | YP_108136.1    | hypothetical protein BPSL1516                         |
| Burkholderia pseudomallei K96243 | 1.50E-006 | BamC  | YP_108532.1    | hypothetical protein BPSL1933                         |
| Burkholderia pseudomallei K96243 | 1.70E-006 | BamC  | YP_108853.1    | putative lipoprotein                                  |
| Burkholderia pseudomallei K96243 | 2.30E-086 | BamD  | YP_108151.1    | putative lipoprotein                                  |
| Burkholderia pseudomallei K96243 | 2.00E-024 | BamE  | YP_109536.1    | putative outer membrane protein                       |
| Burkholderia pseudomallei K96243 | 5.10E-006 | BamE  | YP_110918.1    | OmpA family protein                                   |



## beta\_e-5

|                                  |           |       |                |                                                                                |
|----------------------------------|-----------|-------|----------------|--------------------------------------------------------------------------------|
| Burkholderia pseudomallei K96243 | 3.60E-212 | Omp85 | YP_108746.1    | putative outer membrane protein                                                |
| Burkholderia pseudomallei K96243 | 2.80E-006 | Omp85 | YP_107622.1    | hypothetical protein BPSL0994                                                  |
| Burkholderia rhizoxinica HKI 454 | 4.40E-114 | BamB  | YP_004029018.1 | PQQ enzyme repeat family protein                                               |
| Burkholderia rhizoxinica HKI 454 | 1.10E-006 | BamC  | YP_004029089.1 | hypothetical protein RBRH_03658                                                |
| Burkholderia rhizoxinica HKI 454 | 8.30E-006 | BamC  | YP_004029602.1 | hypothetical protein RBRH_03861                                                |
| Burkholderia rhizoxinica HKI 454 | 2.80E-089 | BamD  | YP_004029033.1 | lipoprotein, ComL family                                                       |
| Burkholderia rhizoxinica HKI 454 | 2.20E-005 | BamD  | YP_004029704.1 | Tol system periplasmic component YbgF                                          |
| Burkholderia rhizoxinica HKI 454 | 1.40E-019 | BamE  | YP_004028057.1 | outer membrane lipoprotein OmlA                                                |
| Burkholderia rhizoxinica HKI 454 | 2.00E-216 | Omp85 | YP_004029174.1 | outer membrane protein assembly factor yaeT                                    |
| Burkholderia rhizoxinica HKI 454 | 1.60E-005 | Omp85 | YP_004028280.1 | outer membrane protein                                                         |
| Burkholderia sp. 383             | 4.30E-112 | BamB  | YP_369348.1    | Pyrrolo-quinoline quinone                                                      |
| Burkholderia sp. 383             | 1.10E-007 | BamC  | YP_368866.1    | uncharacterized lipoprotein-like                                               |
| Burkholderia sp. 383             | 2.30E-006 | BamC  | YP_369638.1    | uncharacterized lipoprotein                                                    |
| Burkholderia sp. 383             | 2.10E-084 | BamD  | YP_369333.1    | DNA uptake lipoprotein-like                                                    |
| Burkholderia sp. 383             | 1.10E-023 | BamE  | YP_367981.1    | outer membrane lipoprotein, SmpA/OmlA                                          |
| Burkholderia sp. 383             | 3.10E-214 | Omp85 | YP_369559.1    | surface antigen (D15)                                                          |
| Burkholderia sp. 383             | 4.60E-006 | Omp85 | YP_370008.1    | surface antigen (D15)                                                          |
| Burkholderia sp. CCGE1001        | 1.60E-123 | BamB  | YP_004228728.1 | outer membrane assembly lipoprotein YfgL                                       |
| Burkholderia sp. CCGE1001        | 6.90E-009 | BamB  | YP_004231421.1 | PQQ-dependent dehydrogenase                                                    |
| Burkholderia sp. CCGE1001        | 1.20E-005 | BamB  | YP_004230414.1 | PQQ-dependent dehydrogenase                                                    |
| Burkholderia sp. CCGE1001        | 8.60E-005 | BamB  | YP_004231815.1 | membrane-bound PQQ-dependent dehydrogenase, glucose/quinolate/shikimate family |
| Burkholderia sp. CCGE1001        | 1.50E-006 | BamC  | YP_004228737.1 | lipoprotein                                                                    |
| Burkholderia sp. CCGE1001        | 2.20E-005 | BamC  | YP_004228850.1 | exported lipoprotein                                                           |
| Burkholderia sp. CCGE1001        | 6.00E-091 | BamD  | YP_004228288.1 | outer membrane assembly lipoprotein YfiO                                       |
| Burkholderia sp. CCGE1001        | 7.70E-005 | BamD  | YP_004226989.1 | tol-pal system protein YbgF                                                    |
| Burkholderia sp. CCGE1001        | 5.60E-023 | BamE  | YP_004229501.1 | SmpA/OmlA domain-containing protein                                            |
| Burkholderia sp. CCGE1001        | 1.70E-210 | Omp85 | YP_004228633.1 | outer membrane protein assembly complex protein YaeT                           |
| Burkholderia sp. CCGE1001        | 1.90E-006 | Omp85 | YP_004227287.1 | surface antigen (D15)                                                          |
| Burkholderia sp. CCGE1001        | 9.10E-199 | Omp85 | YP_004231961.1 | outer membrane protein assembly complex, YaeT protein                          |
| Burkholderia sp. CCGE1002        | 3.00E-125 | BamB  | YP_003605424.1 | outer membrane assembly lipoprotein YfgL                                       |
| Burkholderia sp. CCGE1002        | 3.40E-008 | BamB  | YP_003604859.1 | PQQ-dependent dehydrogenase, methanol/ethanol family                           |
| Burkholderia sp. CCGE1002        | 9.00E-005 | BamB  | YP_003604869.1 | hypothetical protein                                                           |
| Burkholderia sp. CCGE1002        | 5.00E-007 | BamB  | YP_003608990.1 | PQQ-dependent enzyme-like protein                                              |
| Burkholderia sp. CCGE1002        | 1.30E-005 | BamB  | YP_003606784.1 | PQQ-dependent dehydrogenase, methanol/ethanol family                           |
| Burkholderia sp. CCGE1002        | 3.70E-006 | BamB  | YP_003609734.1 | membrane-bound PQQ-dependent dehydrogenase, glucose/quinolate/shikimate family |
| Burkholderia sp. CCGE1002        | 2.40E-006 | BamC  | YP_003605433.1 | lipoprotein                                                                    |
| Burkholderia sp. CCGE1002        | 2.50E-006 | BamC  | YP_003605540.1 | exported lipoprotein                                                           |

## beta\_e-5

|                                 |           |       |                |                                                                                |
|---------------------------------|-----------|-------|----------------|--------------------------------------------------------------------------------|
| Burkholderia sp. CCGE1002       | 3.70E-088 | BamD  | YP_003604996.1 | outer membrane assembly lipoprotein YfiO                                       |
| Burkholderia sp. CCGE1002       | 3.60E-022 | BamE  | YP_003606205.1 | SmpA/OmlA domain protein                                                       |
| Burkholderia sp. CCGE1002       | 6.90E-211 | Omp85 | YP_003605341.1 | outer membrane protein assembly complex, YaeT protein                          |
| Burkholderia sp. CCGE1002       | 1.90E-006 | Omp85 | YP_003604338.1 | surface antigen (D15)                                                          |
| Burkholderia sp. CCGE1003       | 5.10E-124 | BamB  | YP_003906476.1 | outer membrane assembly lipoprotein YfgL                                       |
| Burkholderia sp. CCGE1003       | 5.90E-009 | BamB  | YP_003909716.1 | PQQ-dependent dehydrogenase, methanol/ethanol family                           |
| Burkholderia sp. CCGE1003       | 2.60E-005 | BamB  | YP_003910669.1 | PQQ-dependent dehydrogenase, methanol/ethanol family                           |
| Burkholderia sp. CCGE1003       | 3.10E-005 | BamB  | YP_003909274.1 | membrane-bound PQQ-dependent dehydrogenase, glucose/quinolate/shikimate family |
| Burkholderia sp. CCGE1003       | 1.20E-006 | BamC  | YP_003906467.1 | putative lipoprotein                                                           |
| Burkholderia sp. CCGE1003       | 2.40E-005 | BamC  | YP_003906355.1 | putative exported lipoprotein                                                  |
| Burkholderia sp. CCGE1003       | 9.20E-091 | BamD  | YP_003906814.1 | outer membrane assembly lipoprotein YfiO                                       |
| Burkholderia sp. CCGE1003       | 4.70E-005 | BamD  | YP_003905773.1 | tol-pal system protein YbgF                                                    |
| Burkholderia sp. CCGE1003       | 3.60E-023 | BamE  | YP_003908208.1 | SmpA/OmlA domain-containing protein                                            |
| Burkholderia sp. CCGE1003       | 1.90E-210 | Omp85 | YP_003906563.1 | outer membrane protein assembly complex, YaeT protein                          |
| Burkholderia sp. CCGE1003       | 2.70E-006 | Omp85 | YP_003906149.1 | surface antigen (D15)                                                          |
| Burkholderia sp. CCGE1003       | 2.70E-201 | Omp85 | YP_003910252.1 | outer membrane protein assembly complex, YaeT protein                          |
| Burkholderia sp. JV3            | 5.80E-116 | BamB  | YP_004792262.1 | outer membrane assembly lipoprotein YfgL                                       |
| Burkholderia sp. JV3            | 2.20E-070 | BamD  | YP_004793738.1 | outer membrane assembly lipoprotein YfiO                                       |
| Burkholderia sp. JV3            | 1.40E-020 | BamE  | YP_004792191.1 | SmpA/OmlA domain-containing protein                                            |
| Burkholderia sp. JV3            | 2.70E-005 | BamE  | YP_004792918.1 | OmpA/MotB domain-containing protein                                            |
| Burkholderia sp. JV3            | 6.40E-005 | BamE  | YP_004790936.1 | EF hand repeat-containing protein                                              |
| Burkholderia sp. JV3            | 3.60E-182 | Omp85 | YP_004791805.1 | outer membrane protein assembly complex, YaeT protein                          |
| Burkholderia sp. JV3            | 1.10E-006 | Omp85 | YP_004794564.1 | surface antigen (D15)                                                          |
| Burkholderia thailandensis E264 | 3.00E-117 | BamB  | YP_442758.1    | lipoprotein                                                                    |
| Burkholderia thailandensis E264 | 5.70E-007 | BamC  | YP_443095.1    | lipoprotein                                                                    |
| Burkholderia thailandensis E264 | 8.90E-007 | BamC  | YP_442437.1    | lipoprotein                                                                    |
| Burkholderia thailandensis E264 | 1.10E-086 | BamD  | YP_442773.1    | competence lipoprotein ComL                                                    |
| Burkholderia thailandensis E264 | 9.40E-006 | BamE  | YP_439684.1    | OmpA/SmpA/OmlA family outer membrane lipoprotein                               |
| Burkholderia thailandensis E264 | 1.40E-025 | BamE  | YP_441754.1    | outer membrane lipoprotein                                                     |
| Burkholderia thailandensis E264 | 3.30E-211 | Omp85 | YP_442559.1    | OMP85 family outer membrane protein                                            |
| Burkholderia thailandensis E264 | 3.80E-007 | Omp85 | YP_441407.1    | OMP85 family outer membrane protein                                            |
| Burkholderia vietnamiensis G4   | 2.70E-008 | BamB  | YP_001115712.1 | Pyrrolo-quinoline quinone                                                      |
| Burkholderia vietnamiensis G4   | 6.30E-115 | BamB  | YP_001119575.1 | Pyrrolo-quinoline quinone                                                      |
| Burkholderia vietnamiensis G4   | 6.20E-007 | BamC  | YP_001119296.1 | hypothetical protein Bcep1808_1453                                             |
| Burkholderia vietnamiensis G4   | 1.30E-006 | BamC  | YP_001120010.1 | lipoprotein                                                                    |
| Burkholderia vietnamiensis G4   | 6.40E-086 | BamD  | YP_001119560.1 | competence lipoprotein ComL                                                    |
| Burkholderia vietnamiensis G4   | 8.10E-008 | BamE  | YP_001110306.1 | lipoprotein                                                                    |

|                                                          |           |       |                |                                                                                                                   |
|----------------------------------------------------------|-----------|-------|----------------|-------------------------------------------------------------------------------------------------------------------|
| Burkholderia vietnamiensis G4                            | 8.00E-024 | BamE  | YP_001118465.1 | SmpA/OmlA domain-containing protein                                                                               |
| Burkholderia vietnamiensis G4                            | 2.40E-214 | Omp85 | YP_001119755.1 | surface antigen (D15)                                                                                             |
| Burkholderia vietnamiensis G4                            | 2.30E-006 | Omp85 | YP_001120356.1 | surface antigen (D15)                                                                                             |
| Burkholderia xenovorans LB400                            | 7.30E-123 | BamB  | YP_559410.1    | transcription accessory protein, TEX                                                                              |
| Burkholderia xenovorans LB400                            | 1.50E-008 | BamB  | YP_554990.1    | putative alcohol dehydrogenase                                                                                    |
| Burkholderia xenovorans LB400                            | 1.50E-007 | BamB  | YP_552926.1    | putative quinoprotein alcohol dehydrogenase                                                                       |
| Burkholderia xenovorans LB400                            | 8.50E-006 | BamB  | YP_552914.1    | methanol dehydrogenase-like protein (xoxF)                                                                        |
| Burkholderia xenovorans LB400                            | 8.40E-007 | BamC  | YP_559421.1    | putative lipoprotein                                                                                              |
| Burkholderia xenovorans LB400                            | 5.80E-088 | BamD  | YP_558675.1    | putative competence lipoprotein, ComL                                                                             |
| Burkholderia xenovorans LB400                            | 5.10E-005 | BamD  | YP_557127.1    | putative transmembrane protein                                                                                    |
| Burkholderia xenovorans LB400                            | 9.30E-020 | BamE  | YP_560413.1    | putative outer membrane lipoprotein                                                                               |
| Burkholderia xenovorans LB400                            | 3.50E-005 | BamE  | YP_554483.1    | hypothetical protein Bxe_B0821                                                                                    |
| Burkholderia xenovorans LB400                            | 1.20E-210 | Omp85 | YP_559317.1    | putative outer membrane antigen                                                                                   |
| Burkholderia xenovorans LB400                            | 7.10E-006 | Omp85 | YP_557552.1    | hypothetical protein Bxe_A3485                                                                                    |
| Candidatus Accumulibacter phosphatis clade IIA str. UW-1 | 4.60E-125 | BamB  | YP_003167339.1 | outer membrane assembly lipoprotein YfgL                                                                          |
| Candidatus Accumulibacter phosphatis clade IIA str. UW-1 | 2.60E-009 | BamC  | YP_003166626.1 | NlpBDapX family lipoprotein                                                                                       |
| Candidatus Accumulibacter phosphatis clade IIA str. UW-1 | 6.30E-110 | BamD  | YP_003169102.1 | outer membrane assembly lipoprotein YfiO                                                                          |
| Candidatus Accumulibacter phosphatis clade IIA str. UW-1 | 9.10E-022 | BamE  | YP_003168917.1 | SmpA/OmlA domain-containing protein                                                                               |
| Candidatus Accumulibacter phosphatis clade IIA str. UW-1 | 9.00E-216 | Omp85 | YP_003168077.1 | outer membrane protein assembly complex, YaeT protein                                                             |
| Chromobacterium violaceum ATCC 12472                     | 1.80E-065 | BamB  | NP_903205.1    | hypothetical protein CV_3535                                                                                      |
| Chromobacterium violaceum ATCC 12472                     | 5.10E-009 | BamC  | NP_903249.1    | hypothetical protein CV_3579                                                                                      |
| Chromobacterium violaceum ATCC 12472                     | 3.70E-102 | BamD  | NP_901863.1    | competence lipoprotein ComL                                                                                       |
| Chromobacterium violaceum ATCC 12472                     | 7.00E-022 | BamE  | NP_901466.1    | outer membrane lipoprotein OmlA                                                                                   |
| Chromobacterium violaceum ATCC 12472                     | 2.80E-249 | Omp85 | NP_901874.1    | outer membrane protein                                                                                            |
| Chromobacterium violaceum ATCC 12472                     | 4.20E-005 | Omp85 | NP_900203.1    | outer membrane protein<br>putative serine/threonine protein kinase with quinoprotein alcohol dehydrogenase domain |
| Collimonas fungivorans Ter331                            | 1.10E-123 | BamB  | YP_004752573.1 | alcohol dehydrogenase domain                                                                                      |
| Collimonas fungivorans Ter331                            | 6.40E-007 | BamC  | YP_004752334.1 | putative lipoprotein                                                                                              |
| Collimonas fungivorans Ter331                            | 2.60E-100 | BamD  | YP_004752426.1 | putative lipoprotein with tetratricopeptide repeats (TPR) domain                                                  |
| Collimonas fungivorans Ter331                            | 8.50E-018 | BamE  | YP_004754502.1 | hypothetical protein CFU_3855                                                                                     |
| Collimonas fungivorans Ter331                            | 2.50E-006 | BamE  | YP_004750945.1 | outer membrane protein A                                                                                          |
| Collimonas fungivorans Ter331                            | 4.20E-005 | BamE  | YP_004754128.1 | hypothetical protein CFU_3481                                                                                     |
| Collimonas fungivorans Ter331                            | 8.10E-204 | Omp85 | YP_004751994.1 | outer membrane protein sensing stress                                                                             |
| Collimonas fungivorans Ter331                            | 2.10E-005 | Omp85 | YP_004751831.1 | outer membrane protein                                                                                            |
| Comamonas testosteroni CNB-2                             | 1.00E-043 | BamB  | YP_003279327.1 | pyrrolo-quinoline quinone                                                                                         |
| Comamonas testosteroni CNB-2                             | 1.20E-007 | BamB  | YP_003277430.1 | pyrrolo-quinoline quinone                                                                                         |
| Comamonas testosteroni CNB-2                             | 1.40E-007 | BamB  | YP_003276239.1 | pyrrolo-quinoline quinone                                                                                         |
| Comamonas testosteroni CNB-2                             | 2.40E-006 | BamB  | YP_003277128.1 | pyrrolo-quinoline quinone                                                                                         |

|                                   |           |       |                |                                                                                                                                                              |
|-----------------------------------|-----------|-------|----------------|--------------------------------------------------------------------------------------------------------------------------------------------------------------|
| Comamonas testosteroni CNB-2      | 4.00E-005 | BamB  | YP_003278852.1 | pyrrolo-quinoline quinone                                                                                                                                    |
| Comamonas testosteroni CNB-2      | 3.80E-007 | BamC  | YP_003277199.1 | NlpBDapX lipoprotein                                                                                                                                         |
| Comamonas testosteroni CNB-2      | 2.20E-075 | BamD  | YP_003278181.1 | transmembrane protein                                                                                                                                        |
| Comamonas testosteroni CNB-2      | 2.80E-012 | BamE  | YP_003280686.1 | SmpA/OmlA                                                                                                                                                    |
| Comamonas testosteroni CNB-2      | 4.60E-183 | Omp85 | YP_003279266.1 | surface antigen (D15)<br>outer membrane protein assembly complex subunit YfgL,<br>pyrrolo-quinoline quinone (PQQ) dependent alcohol<br>dehydrogenase subunit |
| Cupriavidus metallidurans CH34    | 3.90E-151 | BamB  | YP_584251.1    |                                                                                                                                                              |
| Cupriavidus metallidurans CH34    | 1.10E-005 | BamC  | YP_583224.1    | putative lipoprotein                                                                                                                                         |
| Cupriavidus metallidurans CH34    | 1.20E-097 | BamD  | YP_583504.1    | DNA uptake lipoprotein                                                                                                                                       |
| Cupriavidus metallidurans CH34    | 3.70E-018 | BamE  | YP_583806.1    | putative small protein A (tmRNA-binding)-related protein<br>(SmpA/OmlA fragment)                                                                             |
| Cupriavidus metallidurans CH34    | 1.70E-017 | BamE  | YP_585117.1    | Lipoprotein                                                                                                                                                  |
| Cupriavidus metallidurans CH34    | 5.90E-006 | BamE  | YP_584912.1    | putative lipoprotein                                                                                                                                         |
| Cupriavidus metallidurans CH34    | 1.10E-005 | BamE  | YP_587836.1    | putative Small protein A<br>outer membrane protein assembly factor,outer membrane<br>protein, surface antigen OMA87                                          |
| Cupriavidus metallidurans CH34    | 1.90E-233 | Omp85 | YP_583595.1    |                                                                                                                                                              |
| Cupriavidus metallidurans CH34    | 5.80E-006 | Omp85 | YP_584914.1    | outer membrane protein                                                                                                                                       |
| Cupriavidus necator N-1           | 1.80E-007 | BamB  | YP_004681209.1 | quinate dehydrogenase (PQQ)                                                                                                                                  |
| Cupriavidus necator N-1           | 7.60E-157 | BamB  | YP_004686085.1 | lipoprotein YfgL                                                                                                                                             |
| Cupriavidus necator N-1           | 1.80E-007 | BamB  | YP_004685515.1 | quinoprotein ethanol dehydrogenase ExaA                                                                                                                      |
| Cupriavidus necator N-1           | 3.50E-007 | BamB  | YP_004685687.1 | quinoxinoprotein ethanol dehydrogenase type-1                                                                                                                |
| Cupriavidus necator N-1           | 2.70E-006 | BamB  | YP_004687893.1 | alcohol dehydrogenase                                                                                                                                        |
| Cupriavidus necator N-1           | 7.20E-007 | BamC  | YP_004684989.1 | hypothetical protein CNE_1c11530                                                                                                                             |
| Cupriavidus necator N-1           | 5.70E-099 | BamD  | YP_004685288.1 | competence lipoprotein ComL                                                                                                                                  |
| Cupriavidus necator N-1           | 2.60E-019 | BamE  | YP_004686891.1 | lipoprotein                                                                                                                                                  |
| Cupriavidus necator N-1           | 1.90E-005 | BamE  | YP_004686698.1 | hypothetical protein CNE_1c29040                                                                                                                             |
| Cupriavidus necator N-1           | 3.50E-223 | Omp85 | YP_004685806.1 | outer membrane protein surface antigen                                                                                                                       |
| Cupriavidus necator N-1           | 6.60E-006 | Omp85 | YP_004686700.1 | hypothetical protein CNE_1c29060                                                                                                                             |
| Cupriavidus taiwanensis LMG 19424 | 6.00E-158 | BamB  | YP_002005910.1 | hypothetical protein RALTA_A1906                                                                                                                             |
| Cupriavidus taiwanensis LMG 19424 | 3.20E-007 | BamB  | YP_002005589.1 | quinoxinoprotein ethanol dehydrogenase<br>quinoprotein ethanol dehydrogenase, pqq dehydrogenase<br>family                                                    |
| Cupriavidus taiwanensis LMG 19424 | 2.20E-007 | BamB  | YP_002007344.1 |                                                                                                                                                              |
| Cupriavidus taiwanensis LMG 19424 | 2.70E-007 | BamC  | YP_002005213.1 | lipoprotein                                                                                                                                                  |
| Cupriavidus taiwanensis LMG 19424 | 4.70E-101 | BamD  | YP_002005370.1 | hypothetical protein RALTA_A1346                                                                                                                             |
| Cupriavidus taiwanensis LMG 19424 | 1.20E-018 | BamE  | YP_002006609.1 | outer membrane lipoprotein, smpa/omla family                                                                                                                 |
| Cupriavidus taiwanensis LMG 19424 | 3.20E-005 | BamE  | YP_002006423.1 | hypothetical protein RALTA_A2428                                                                                                                             |
| Cupriavidus taiwanensis LMG 19424 | 3.50E-223 | Omp85 | YP_002005691.1 | hypothetical protein RALTA_A1683                                                                                                                             |
| Cupriavidus taiwanensis LMG 19424 | 2.90E-005 | Omp85 | YP_002006425.1 | hypothetical protein RALTA_A2430                                                                                                                             |
| Dechloromonas aromatica RCB       | 2.80E-116 | BamB  | YP_286182.1    | Pyrrrolo-quinoline quinone                                                                                                                                   |
| Dechloromonas aromatica RCB       | 1.20E-007 | BamB  | YP_284249.1    | Pyrrrolo-quinoline quinone                                                                                                                                   |

## beta\_e-5

|                                    |           |       |                |                                                                                                                                  |
|------------------------------------|-----------|-------|----------------|----------------------------------------------------------------------------------------------------------------------------------|
| Dechloromonas aromatica RCB        | 2.40E-007 | BamC  | YP_284073.1    | NlpBDapX lipoprotein                                                                                                             |
| Dechloromonas aromatica RCB        | 1.90E-096 | BamD  | YP_284822.1    | putative competence lipoprotein precursor                                                                                        |
| Dechloromonas aromatica RCB        | 2.70E-019 | BamE  | YP_284161.1    | SmpA/OmlA                                                                                                                        |
| Dechloromonas aromatica RCB        | 1.20E-211 | Omp85 | YP_284967.1    | surface antigen (D15):surface antigen variable number                                                                            |
| Delftia acidovorans SPH-1          | 4.00E-044 | BamB  | YP_001566030.1 | outer membrane assembly lipoprotein YfgL                                                                                         |
| Delftia acidovorans SPH-1          | 7.30E-007 | BamB  | YP_001564375.1 | methanol/ethanol family PQQ-dependent dehydrogenase<br>PQQ-dependent dehydrogenase glucose/quininate/shikimate<br>family protein |
| Delftia acidovorans SPH-1          | 3.40E-005 | BamB  | YP_001561373.1 |                                                                                                                                  |
| Delftia acidovorans SPH-1          | 5.40E-008 | BamC  | YP_001566104.1 | NlpB/DapX family lipoprotein                                                                                                     |
| Delftia acidovorans SPH-1          | 8.30E-074 | BamD  | YP_001564521.1 | putative transmembrane protein                                                                                                   |
| Delftia acidovorans SPH-1          | 4.90E-012 | BamE  | YP_001567021.1 | SmpA/OmlA domain-containing protein                                                                                              |
| Delftia acidovorans SPH-1          | 3.70E-189 | Omp85 | YP_001565954.1 | outer membrane protein assembly complex protein YaeT                                                                             |
| Delftia acidovorans SPH-1          | 6.90E-005 | Omp85 | YP_001562686.1 | surface antigen (D15)                                                                                                            |
| Delftia sp. Cs1-4                  | 9.40E-044 | BamB  | YP_004486986.1 | outer membrane assembly lipoprotein YfgL                                                                                         |
| Delftia sp. Cs1-4                  | 1.60E-006 | BamB  | YP_004488764.1 | methanol/ethanol family PQQ-dependent dehydrogenase                                                                              |
| Delftia sp. Cs1-4                  | 4.40E-005 | BamB  | YP_004485750.1 | membrane-bound PQQ-dependent dehydrogenase                                                                                       |
| Delftia sp. Cs1-4                  | 9.20E-008 | BamC  | YP_004486909.1 | NlpBDapX family lipoprotein                                                                                                      |
| Delftia sp. Cs1-4                  | 8.30E-074 | BamD  | YP_004488671.1 | outer membrane assembly lipoprotein YfiO                                                                                         |
| Delftia sp. Cs1-4                  | 4.90E-012 | BamE  | YP_004491210.1 | SmpA/OmlA domain-containing protein                                                                                              |
| Delftia sp. Cs1-4                  | 1.20E-188 | Omp85 | YP_004487286.1 | outer membrane protein assembly complex, YaeT protein                                                                            |
| Delftia sp. Cs1-4                  | 7.60E-005 | Omp85 | YP_004490245.1 | surface antigen (D15)                                                                                                            |
| Gallionella capsiferriformans ES-2 | 7.30E-104 | BamB  | YP_003847181.1 | outer membrane assembly lipoprotein YfgL                                                                                         |
| Gallionella capsiferriformans ES-2 | 3.90E-008 | BamC  | YP_003847968.1 | NlpBDapX lipoprotein                                                                                                             |
| Gallionella capsiferriformans ES-2 | 1.70E-093 | BamD  | YP_003847878.1 | outer membrane assembly lipoprotein YfiO                                                                                         |
| Gallionella capsiferriformans ES-2 | 5.30E-005 | BamD  | YP_003847368.1 | hypothetical protein Galf_1586                                                                                                   |
| Gallionella capsiferriformans ES-2 | 3.10E-028 | BamE  | YP_003847922.1 | SmpA/OmlA domain-containing protein                                                                                              |
| Gallionella capsiferriformans ES-2 | 3.10E-005 | BamE  | YP_003846457.1 | hypothetical protein Galf_0652                                                                                                   |
| Gallionella capsiferriformans ES-2 | 1.30E-208 | Omp85 | YP_003847560.1 | outer membrane protein assembly complex, YaeT protein                                                                            |
| Herbaspirillum seropedicae SmR1    | 2.60E-114 | BamB  | YP_003776346.1 | lipoprotein transmembrane protein                                                                                                |
| Herbaspirillum seropedicae SmR1    | 1.10E-007 | BamC  | YP_003776664.1 | lipoprotein                                                                                                                      |
| Herbaspirillum seropedicae SmR1    | 2.60E-101 | BamD  | YP_003776400.1 | hypothetical protein Hsero_3004                                                                                                  |
| Herbaspirillum seropedicae SmR1    | 8.80E-006 | BamD  | YP_003774640.1 | Tol-Pal cell envelope complex subunit YbgF protein                                                                               |
| Herbaspirillum seropedicae SmR1    | 2.50E-011 | BamE  | YP_003774034.1 | small protein A                                                                                                                  |
| Herbaspirillum seropedicae SmR1    | 1.50E-005 | BamE  | YP_003776482.1 | lipoprotein                                                                                                                      |
| Herbaspirillum seropedicae SmR1    | 1.00E-213 | Omp85 | YP_003775593.1 | outer membrane /protective OMA87 antigen protein                                                                                 |
| Herbaspirillum seropedicae SmR1    | 8.60E-006 | Omp85 | YP_003774959.1 | outer membrane lipoprotein                                                                                                       |
| Herminiimonas arsenicoxydans       | 9.20E-120 | BamB  | YP_001099569.1 | serine/threonine protein kinase                                                                                                  |
| Herminiimonas arsenicoxydans       | 2.10E-006 | BamC  | YP_001100433.1 | putative lipoprotein                                                                                                             |

## beta\_e-5

|                                 |           |       |                |                                                       |
|---------------------------------|-----------|-------|----------------|-------------------------------------------------------|
| Herminiimonas arsenicoxydans    | 2.90E-096 | BamD  | YP_001100201.1 | TPR repeat-containing protein                         |
| Herminiimonas arsenicoxydans    | 4.30E-005 | BamD  | YP_001100661.1 | putative transmembrane protein                        |
| Herminiimonas arsenicoxydans    | 8.80E-005 | BamD  | YP_001100861.1 | hypothetical protein HEAR2618                         |
| Herminiimonas arsenicoxydans    | 2.40E-017 | BamE  | YP_001100899.1 | hypothetical protein HEAR2656                         |
| Herminiimonas arsenicoxydans    | 1.50E-193 | Omp85 | YP_001099643.1 | outer membrane protein sensing stress                 |
| Herminiimonas arsenicoxydans    | 6.70E-006 | Omp85 | YP_001100761.1 | putative signal peptide                               |
| Janthinobacterium sp. Marseille | 2.30E-108 | BamB  | YP_001353814.1 | pyrrolo-quinoline quinone                             |
| Janthinobacterium sp. Marseille | 7.40E-007 | BamC  | YP_001352973.1 | hypothetical protein mma_1283                         |
| Janthinobacterium sp. Marseille | 2.60E-097 | BamD  | YP_001353082.1 | competence lipoprotein ComL                           |
| Janthinobacterium sp. Marseille | 8.70E-006 | BamD  | YP_001354159.1 | Tol-Pal cell envelope complex subunit YbgF            |
| Janthinobacterium sp. Marseille | 1.00E-017 | BamE  | YP_001354581.1 | hypothetical protein mma_2890                         |
| Janthinobacterium sp. Marseille | 6.50E-005 | BamE  | YP_001352798.1 | hypothetical protein mma_1108                         |
| Janthinobacterium sp. Marseille | 1.90E-198 | Omp85 | YP_001353740.1 | outer membrane protein                                |
| Janthinobacterium sp. Marseille | 1.10E-006 | Omp85 | YP_001354293.1 | hypothetical protein mma_2603                         |
| Laribacter hongkongensis HLHK9  | 6.20E-076 | BamB  | YP_002794690.1 | pyrrolo-quinoline quinone                             |
| Laribacter hongkongensis HLHK9  | 2.60E-103 | BamD  | YP_002796212.1 | ComL                                                  |
| Laribacter hongkongensis HLHK9  | 7.10E-023 | BamE  | YP_002795429.1 | SmpA/OmlA                                             |
| Laribacter hongkongensis HLHK9  | 6.00E-005 | BamE  | YP_002795929.1 | hypothetical protein LHK_01936                        |
| Laribacter hongkongensis HLHK9  | 6.50E-232 | Omp85 | YP_002796276.1 | outer membrane protein                                |
| Laribacter hongkongensis HLHK9  | 7.20E-006 | Omp85 | YP_002794520.1 | Surface antigen                                       |
| Leptothrix cholodnii SP-6       | 2.60E-029 | BamB  | YP_001791895.1 | outer membrane assembly lipoprotein YfgL              |
| Leptothrix cholodnii SP-6       | 9.20E-008 | BamB  | YP_001789888.1 | Pyrrrolo-quinoline quinone                            |
| Leptothrix cholodnii SP-6       | 1.80E-007 | BamB  | YP_001790843.1 | methanol/ethanol family PQQ-dependent dehydrogenase   |
| Leptothrix cholodnii SP-6       | 1.10E-006 | BamB  | YP_001789886.1 | Pyrrrolo-quinoline quinone                            |
| Leptothrix cholodnii SP-6       | 9.40E-005 | BamB  | YP_001792131.1 | methanol/ethanol family PQQ-dependent dehydrogenase   |
| Leptothrix cholodnii SP-6       | 4.50E-009 | BamC  | YP_001791671.1 | NlpB/DapX family lipoprotein                          |
| Leptothrix cholodnii SP-6       | 2.10E-069 | BamD  | YP_001791906.1 | putative transmembrane protein                        |
| Leptothrix cholodnii SP-6       | 2.50E-019 | BamE  | YP_001789515.1 | SmpA/OmlA domain-containing protein                   |
| Leptothrix cholodnii SP-6       | 1.90E-173 | Omp85 | YP_001791872.1 | outer membrane protein assembly complex, YaeT protein |
| Leptothrix cholodnii SP-6       | 2.00E-005 | Omp85 | YP_001792186.1 | surface antigen (D15)                                 |
| Methylibium petroleiphilum PM1  | 1.20E-049 | BamB  | YP_001021186.1 | hypothetical protein Mpe_A1993                        |
| Methylibium petroleiphilum PM1  | 7.50E-009 | BamB  | YP_001020074.1 | alcohol dehydrogenase large subunit                   |
| Methylibium petroleiphilum PM1  | 2.60E-008 | BamB  | YP_001022848.1 | putative alcohol dehydrogenase                        |
| Methylibium petroleiphilum PM1  | 4.70E-008 | BamB  | YP_001020792.1 | putative alcohol dehydrogenase                        |
| Methylibium petroleiphilum PM1  | 7.90E-008 | BamB  | YP_001020788.1 | putative quinoprotein ethanol dehydrogenase           |
| Methylibium petroleiphilum PM1  | 8.40E-008 | BamB  | YP_001019560.1 | putative alcohol dehydrogenase                        |
| Methylibium petroleiphilum PM1  | 1.80E-007 | BamB  | YP_001019670.1 | quinoprotein ethanol dehydrogenase                    |
| Methylibium petroleiphilum PM1  | 7.50E-007 | BamB  | YP_001020102.1 | alcohol dehydrogenase                                 |

## beta\_e-5

|                                |           |       |                |                                                                |
|--------------------------------|-----------|-------|----------------|----------------------------------------------------------------|
| Methylibium petroleiphilum PM1 | 3.30E-006 | BamB  | YP_001019673.1 | quinoprotein alcohol dehydrogenase                             |
| Methylibium petroleiphilum PM1 | 5.70E-006 | BamB  | YP_001019538.1 | putative quinoprotein ethanol dehydrogenase                    |
| Methylibium petroleiphilum PM1 | 1.30E-005 | BamB  | YP_001020791.1 | glucose dehydrogenase                                          |
| Methylibium petroleiphilum PM1 | 8.30E-005 | BamB  | YP_001022581.1 | putative methanol dehydrogenase protein, large subunit         |
| Methylibium petroleiphilum PM1 | 2.00E-005 | BamC  | YP_001021752.1 | putative transmembrane protein                                 |
| Methylibium petroleiphilum PM1 | 3.60E-091 | BamD  | YP_001021197.1 | putative transmembrane protein                                 |
| Methylibium petroleiphilum PM1 | 9.80E-005 | BamD  | YP_001021992.1 | putative ABC-type Co2+ transport system, periplasmic component |
| Methylibium petroleiphilum PM1 | 4.50E-015 | BamE  | YP_001019419.1 | small protein A (tmRNA-binding)-like protein                   |
| Methylibium petroleiphilum PM1 | 1.30E-171 | Omp85 | YP_001021164.1 | putative outer membrane signal peptide protein                 |
| Methylibium petroleiphilum PM1 | 3.50E-006 | Omp85 | YP_001020286.1 | hypothetical protein Mpe_A1090                                 |
| Methylobacillus flagellatus KT | 2.50E-118 | BamB  | YP_545724.1    | Pyrrolo-quinoline quinone                                      |
| Methylobacillus flagellatus KT | 2.50E-006 | BamB  | YP_546422.1    | Pyrrolo-quinoline quinone                                      |
| Methylobacillus flagellatus KT | 1.70E-005 | BamB  | YP_544456.1    | Pyrrolo-quinoline quinone                                      |
| Methylobacillus flagellatus KT | 2.40E-005 | BamB  | YP_545560.1    | Pyrrolo-quinoline quinone                                      |
| Methylobacillus flagellatus KT | 3.00E-005 | BamB  | YP_545826.1    | Pyrrolo-quinoline quinone                                      |
| Methylobacillus flagellatus KT | 7.70E-005 | BamB  | YP_546152.1    | Pyrrolo-quinoline quinone                                      |
| Methylobacillus flagellatus KT | 2.10E-005 | BamC  | YP_545095.1    | uncharacterized lipoprotein                                    |
| Methylobacillus flagellatus KT | 2.10E-005 | BamC  | YP_544951.1    | uncharacterized lipoprotein                                    |
| Methylobacillus flagellatus KT | 7.40E-097 | BamD  | YP_545722.1    | putative competence lipoprotein precursor                      |
| Methylobacillus flagellatus KT | 9.00E-017 | BamE  | YP_544885.1    | SmpA/OmlA                                                      |
| Methylobacillus flagellatus KT | 1.80E-214 | Omp85 | YP_545631.1    | surface antigen (D15)                                          |
| Methylobacillus flagellatus KT | 4.00E-006 | Omp85 | YP_545928.1    | surface antigen (D15)                                          |
| Methylotenera mobilis JLW8     | 3.90E-105 | BamB  | YP_003048308.1 | outer membrane assembly lipoprotein YfgL                       |
| Methylotenera mobilis JLW8     | 8.90E-009 | BamB  | YP_003048647.1 | Pyrrolo-quinoline quinone                                      |
| Methylotenera mobilis JLW8     | 7.30E-006 | BamB  | YP_003049477.1 | PQQ-dependent dehydrogenase                                    |
| Methylotenera mobilis JLW8     | 2.70E-005 | BamB  | YP_003049201.1 | PQQ-dependent dehydrogenase                                    |
| Methylotenera mobilis JLW8     | 8.90E-006 | BamC  | YP_003049382.1 | lipoprotein                                                    |
| Methylotenera mobilis JLW8     | 1.70E-096 | BamD  | YP_003048313.1 | outer membrane assembly lipoprotein YfiO                       |
| Methylotenera mobilis JLW8     | 9.30E-005 | BamD  | YP_003049506.1 | tol-pal system protein YbgF                                    |
| Methylotenera mobilis JLW8     | 9.60E-005 | BamD  | YP_003048513.1 | type II and III secretion system protein                       |
| Methylotenera mobilis JLW8     | 4.40E-020 | BamE  | YP_003049140.1 | SmpA/OmlA domain-containing protein                            |
| Methylotenera mobilis JLW8     | 3.80E-214 | Omp85 | YP_003048593.1 | outer membrane protein assembly complex protein YaeT           |
| Methylotenera mobilis JLW8     | 7.20E-006 | Omp85 | YP_003048181.1 | surface antigen (D15)                                          |
| Methylotenera versatilis 301   | 1.30E-105 | BamB  | YP_003673884.1 | outer membrane assembly lipoprotein YfgL                       |
| Methylotenera versatilis 301   | 3.20E-008 | BamB  | YP_003674218.1 | PQQ-dependent enzyme-like protein                              |
| Methylotenera versatilis 301   | 3.80E-006 | BamB  | YP_003675402.1 | PQQ-dependent dehydrogenase                                    |
| Methylotenera versatilis 301   | 2.90E-006 | BamC  | YP_003675311.1 | lipoprotein                                                    |

|                                    |           |       |                |                                                      |
|------------------------------------|-----------|-------|----------------|------------------------------------------------------|
| Methylotenera versatilis 301       | 8.60E-093 | BamD  | YP_003673888.1 | outer membrane assembly lipoprotein YfiO             |
| Methylotenera versatilis 301       | 2.50E-005 | BamD  | YP_003675443.1 | tol-pal system protein YbgF                          |
| Methylotenera versatilis 301       | 3.30E-022 | BamE  | YP_003674953.1 | SmpA/OmlA domain-containing protein                  |
| Methylotenera versatilis 301       | 8.80E-229 | Omp85 | YP_003674280.1 | outer membrane protein assembly complex protein YaeT |
| Methylotenera versatilis 301       | 4.50E-006 | Omp85 | YP_003673643.1 | surface antigen (D15)                                |
| Methylovorus glucosetrophus SIP3-4 | 3.60E-116 | BamB  | YP_003051483.1 | outer membrane assembly lipoprotein YfgL             |
| Methylovorus glucosetrophus SIP3-4 | 8.50E-007 | BamB  | YP_003051084.1 | Pyrrolo-quinoline quinone                            |
| Methylovorus glucosetrophus SIP3-4 | 2.70E-006 | BamB  | YP_003050509.1 | PQQ-dependent dehydrogenase                          |
| Methylovorus glucosetrophus SIP3-4 | 4.60E-006 | BamB  | YP_003052313.1 | PQQ-dependent dehydrogenase                          |
| Methylovorus glucosetrophus SIP3-4 | 1.10E-005 | BamB  | YP_003051583.1 | PQQ-dependent dehydrogenase                          |
| Methylovorus glucosetrophus SIP3-4 | 1.10E-005 | BamB  | YP_003049792.1 | PQQ-dependent dehydrogenase                          |
| Methylovorus glucosetrophus SIP3-4 | 1.50E-005 | BamB  | YP_003052117.1 | PQQ-dependent dehydrogenase                          |
| Methylovorus glucosetrophus SIP3-4 | 2.10E-006 | BamC  | YP_003051572.1 | lipoprotein                                          |
| Methylovorus glucosetrophus SIP3-4 | 3.10E-098 | BamD  | YP_003051481.1 | outer membrane assembly lipoprotein YfiO             |
| Methylovorus glucosetrophus SIP3-4 | 1.80E-015 | BamE  | YP_003051650.1 | SmpA/OmlA domain-containing protein                  |
| Methylovorus glucosetrophus SIP3-4 | 4.90E-005 | BamE  | YP_003050302.1 | hypothetical protein Msip34_0527                     |
| Methylovorus glucosetrophus SIP3-4 | 1.80E-208 | Omp85 | YP_003051175.1 | outer membrane protein assembly complex protein YaeT |
| Methylovorus sp. MP688             | 5.60E-117 | BamB  | YP_004040100.1 | outer membrane assembly lipoprotein yfgl             |
| Methylovorus sp. MP688             | 2.70E-006 | BamB  | YP_004039179.1 | pqq-dependent dehydrogenase                          |
| Methylovorus sp. MP688             | 3.00E-006 | BamB  | YP_004039785.1 | pyrrolo-quinoline quinone                            |
| Methylovorus sp. MP688             | 5.50E-006 | BamB  | YP_004040874.1 | pqq-dependent dehydrogenase                          |
| Methylovorus sp. MP688             | 1.10E-005 | BamB  | YP_004038451.1 | pqq-dependent dehydrogenase                          |
| Methylovorus sp. MP688             | 4.20E-006 | BamC  | YP_004040192.1 | lipoprotein                                          |
| Methylovorus sp. MP688             | 3.50E-098 | BamD  | YP_004040098.1 | outer membrane assembly lipoprotein yfio             |
| Methylovorus sp. MP688             | 1.80E-015 | BamE  | YP_004040280.1 | smpa/omla domain-containing protein                  |
| Methylovorus sp. MP688             | 4.90E-005 | BamE  | YP_004038970.1 | hypothetical protein MPQ_0551                        |
| Methylovorus sp. MP688             | 1.80E-208 | Omp85 | YP_004039871.1 | outer membrane protein assembly complex protein YaeT |
| Neisseria gonorrhoeae FA 1090      | 2.70E-005 | BamC  | YP_208051.1    | hypothetical protein NGO0948                         |
| Neisseria gonorrhoeae FA 1090      | 3.60E-098 | BamD  | YP_207439.1    | ComL                                                 |
| Neisseria gonorrhoeae FA 1090      | 2.70E-019 | BamE  | YP_208811.1    | hypothetical protein NGO1780                         |
| Neisseria gonorrhoeae FA 1090      | 0.00E+000 | Omp85 | YP_208831.1    | hypothetical protein NGO1801                         |
| Neisseria gonorrhoeae FA 1090      | 1.90E-005 | Omp85 | YP_208979.1    | hypothetical protein NGO1956                         |
| Neisseria gonorrhoeae NCCP11945    | 2.70E-005 | BamC  | YP_002001475.1 | hypothetical protein NGK_0850                        |
| Neisseria gonorrhoeae NCCP11945    | 3.60E-098 | BamD  | YP_002001047.1 | ComL, competence lipoprotein                         |
| Neisseria gonorrhoeae NCCP11945    | 2.70E-019 | BamE  | YP_002003119.1 | Lipoprotein                                          |
| Neisseria gonorrhoeae NCCP11945    | 0.00E+000 | Omp85 | YP_002003098.1 | Outer membrane protein Omp85                         |
| Neisseria gonorrhoeae NCCP11945    | 2.80E-005 | Omp85 | YP_002002918.1 | hypothetical protein NGK_2293                        |
| Neisseria lactamica ST-640         | 4.30E-006 | BamC  | YP_004048914.1 | lipoprotein                                          |



|                                  |           |       |                |                                     |
|----------------------------------|-----------|-------|----------------|-------------------------------------|
| Neisseria lactamica ST-640       | 1.10E-100 | BamD  | YP_004049101.1 | competence lipoprotein              |
| Neisseria lactamica ST-640       | 7.00E-013 | BamE  | YP_004047798.1 | outer membrane lipoprotein          |
| Neisseria lactamica ST-640       | 1.10E-005 | BamE  | YP_004049396.1 | lipoprotein                         |
| Neisseria lactamica ST-640       | 0.00E+000 | Omp85 | YP_004047769.1 | outer membrane protein OMP85        |
| Neisseria lactamica ST-640       | 3.90E-005 | Omp85 | YP_004049578.1 | outer membrane protein              |
| Neisseria meningitidis 053442    | 1.40E-005 | BamC  | YP_001599009.1 | lipoprotein                         |
| Neisseria meningitidis 053442    | 2.20E-100 | BamD  | YP_001598811.1 | competence lipoprotein              |
| Neisseria meningitidis 053442    | 6.60E-019 | BamE  | YP_001600030.1 | lipoprotein                         |
| Neisseria meningitidis 053442    | 1.50E-005 | BamE  | YP_001598484.1 | lipoprotein                         |
| Neisseria meningitidis 053442    | 0.00E+000 | Omp85 | YP_001600055.1 | outer membrane protein OMP85        |
| Neisseria meningitidis 053442    | 2.90E-005 | Omp85 | YP_001600176.1 | putative outer membrane protein     |
| Neisseria meningitidis alpha14   | 2.00E-005 | BamC  | YP_003083030.1 | putative lipoprotein                |
| Neisseria meningitidis alpha14   | 2.20E-099 | BamD  | YP_003082807.1 | DNA uptake lipoprotein              |
| Neisseria meningitidis alpha14   | 3.30E-020 | BamE  | YP_003083975.1 | putative lipoprotein                |
| Neisseria meningitidis alpha14   | 2.70E-006 | BamE  | YP_003082505.1 | lipoprotein                         |
| Neisseria meningitidis alpha14   | 0.00E+000 | Omp85 | YP_003083995.1 | probable surface antigen            |
| Neisseria meningitidis alpha14   | 2.20E-005 | Omp85 | YP_003082289.1 | putative outer membrane protein     |
| Neisseria meningitidis FAM18     | 6.90E-006 | BamC  | YP_974977.1    | putative lipoprotein                |
| Neisseria meningitidis FAM18     | 2.20E-099 | BamD  | YP_974745.1    | competence lipoprotein              |
| Neisseria meningitidis FAM18     | 5.10E-020 | BamE  | YP_974322.1    | putative outer membrane lipoprotein |
| Neisseria meningitidis FAM18     | 8.30E-006 | BamE  | YP_974438.1    | lipoprotein                         |
| Neisseria meningitidis FAM18     | 0.00E+000 | Omp85 | YP_974302.1    | outer membrane protein OMP85        |
| Neisseria meningitidis FAM18     | 3.10E-005 | Omp85 | YP_976025.1    | putative outer membrane protein     |
| Neisseria meningitidis MC58      | 8.60E-006 | BamC  | NP_273967.1    | hypothetical protein NMB0928        |
| Neisseria meningitidis MC58      | 2.80E-099 | BamD  | NP_273745.1    | competence lipoprotein              |
| Neisseria meningitidis MC58      | 3.70E-020 | BamE  | NP_273262.1    | putative lipoprotein                |
| Neisseria meningitidis MC58      | 3.70E-006 | BamE  | NP_274893.1    | lipoprotein                         |
| Neisseria meningitidis MC58      | 0.00E+000 | Omp85 | NP_273240.1    | outer membrane protein OMP85        |
| Neisseria meningitidis MC58      | 3.30E-005 | Omp85 | NP_275119.1    | hypothetical protein NMB2134        |
| Neisseria meningitidis Z2491     | 1.30E-005 | BamC  | YP_002342526.1 | putative lipoprotein                |
| Neisseria meningitidis Z2491     | 2.20E-099 | BamD  | YP_002342337.1 | competence lipoprotein              |
| Neisseria meningitidis Z2491     | 6.60E-019 | BamE  | YP_002341618.1 | putative lipoprotein                |
| Neisseria meningitidis Z2491     | 4.50E-006 | BamE  | YP_002342040.1 | lipoprotein                         |
| Neisseria meningitidis Z2491     | 0.00E+000 | Omp85 | YP_002341637.1 | outer membrane protein OMP85        |
| Neisseria meningitidis Z2491     | 3.00E-005 | Omp85 | YP_002341819.1 | putative outer membrane protein     |
| Nitrosomonas europaea ATCC 19718 | 3.80E-078 | BamB  | NP_840248.1    | PQQ repeat-containing protein       |
| Nitrosomonas europaea ATCC 19718 | 1.50E-008 | BamC  | NP_842399.1    | transmembrane protein               |
| Nitrosomonas europaea ATCC 19718 | 2.10E-098 | BamD  | NP_840591.1    | TPR repeat-containing protein       |

|                                     |           |       |                |                                                       |
|-------------------------------------|-----------|-------|----------------|-------------------------------------------------------|
| Nitrosomonas europaea ATCC 19718    | 1.10E-006 | BamD  | NP_840314.1    | TPR repeat-containing protein                         |
| Nitrosomonas europaea ATCC 19718    | 7.90E-005 | BamD  | NP_841485.1    | TPR repeat-containing protein                         |
| Nitrosomonas europaea ATCC 19718    | 3.20E-025 | BamE  | NP_840699.1    | outer membrane lipoprotein OmlA                       |
| Nitrosomonas europaea ATCC 19718    | 5.90E-213 | Omp85 | NP_841742.1    | surface antigen (D15)                                 |
| Nitrosomonas europaea ATCC 19718    | 1.60E-005 | Omp85 | NP_841004.1    | lipoprotein                                           |
| Nitrosomonas eutropha C91           | 1.20E-073 | BamB  | YP_748352.1    | Pyrrolo-quinoline quinone                             |
| Nitrosomonas eutropha C91           | 1.20E-008 | BamC  | YP_746969.1    | NlpB/DapX family lipoprotein                          |
| Nitrosomonas eutropha C91           | 5.10E-098 | BamD  | YP_747448.1    | TPR repeat-containing protein                         |
| Nitrosomonas eutropha C91           | 1.90E-006 | BamD  | YP_746540.1    | TPR repeat-containing protein                         |
| Nitrosomonas eutropha C91           | 1.40E-005 | BamD  | YP_748260.1    | TPR repeat-containing protein                         |
| Nitrosomonas eutropha C91           | 1.60E-005 | BamD  | YP_746758.1    | TPR repeat-containing protein                         |
| Nitrosomonas eutropha C91           | 1.90E-021 | BamE  | YP_748135.1    | SmpA/OmlA domain-containing protein                   |
| Nitrosomonas eutropha C91           | 6.80E-215 | Omp85 | YP_748215.1    | surface antigen (D15)                                 |
| Nitrosomonas eutropha C91           | 7.10E-005 | Omp85 | YP_747622.1    | surface antigen (D15)                                 |
| Nitrosomonas sp. AL212              | 3.90E-083 | BamB  | YP_004294302.1 | outer membrane assembly lipoprotein YfgL              |
| Nitrosomonas sp. AL212              | 7.00E-007 | BamC  | YP_004295093.1 | putative transmembrane protein                        |
| Nitrosomonas sp. AL212              | 4.60E-108 | BamD  | YP_004294186.1 | outer membrane assembly lipoprotein YfiO              |
| Nitrosomonas sp. AL212              | 3.80E-005 | BamD  | YP_004296029.1 | hypothetical protein NAL212_3105                      |
| Nitrosomonas sp. AL212              | 4.70E-021 | BamE  | YP_004295773.1 | SmpA/OmlA domain-containing protein                   |
| Nitrosomonas sp. AL212              | 3.00E-005 | BamE  | YP_004294569.1 | hypothetical protein NAL212_1526                      |
| Nitrosomonas sp. AL212              | 5.10E-209 | Omp85 | YP_004296056.1 | outer membrane protein assembly complex, YaeT protein |
| Nitrosomonas sp. AL212              | 2.20E-005 | Omp85 | YP_004294820.1 | surface antigen (D15)                                 |
| Nitrosomonas sp. Is79A3             | 3.10E-076 | BamB  | YP_004695345.1 | outer membrane assembly lipoprotein YfgL              |
| Nitrosomonas sp. Is79A3             | 1.70E-007 | BamC  | YP_004693884.1 | NlpBDapX family lipoprotein                           |
| Nitrosomonas sp. Is79A3             | 8.50E-098 | BamD  | YP_004696217.1 | outer membrane assembly lipoprotein YfiO              |
| Nitrosomonas sp. Is79A3             | 8.80E-031 | BamE  | YP_004694403.1 | SmpA/OmlA domain-containing protein                   |
| Nitrosomonas sp. Is79A3             | 1.70E-005 | BamE  | YP_004694262.1 | hypothetical protein Nit79A3_1000                     |
| Nitrosomonas sp. Is79A3             | 3.30E-214 | Omp85 | YP_004696598.1 | outer membrane protein assembly complex, YaeT protein |
| Nitrosomonas sp. Is79A3             | 7.40E-005 | Omp85 | YP_004695338.1 | surface antigen (D15)                                 |
| Nitrosospira multiformis ATCC 25196 | 4.80E-090 | BamB  | YP_413055.1    | Pyrrolo-quinoline quinone                             |
| Nitrosospira multiformis ATCC 25196 | 7.10E-008 | BamC  | YP_412234.1    | NlpBDapX lipoprotein                                  |
| Nitrosospira multiformis ATCC 25196 | 3.80E-099 | BamD  | YP_412662.1    | TPR repeat-containing protein                         |
| Nitrosospira multiformis ATCC 25196 | 4.90E-005 | BamD  | YP_413264.1    | type II and III secretion system protein              |
| Nitrosospira multiformis ATCC 25196 | 2.30E-028 | BamE  | YP_411176.1    | SmpA/OmlA                                             |
| Nitrosospira multiformis ATCC 25196 | 4.00E-006 | BamE  | YP_412228.1    | hypothetical protein Nmul_A1533                       |
| Nitrosospira multiformis ATCC 25196 | 1.70E-225 | Omp85 | YP_411364.1    | surface antigen (D15)                                 |
| Nitrosospira multiformis ATCC 25196 | 1.60E-005 | Omp85 | YP_412486.1    | surface antigen (D15)                                 |
| Polaromonas naphthalenivorans CJ2   | 5.60E-062 | BamB  | YP_982106.1    | Pyrrolo-quinoline quinone                             |

|                                                               |           |       |                |                                                       |
|---------------------------------------------------------------|-----------|-------|----------------|-------------------------------------------------------|
| Polaromonas naphthalenivorans CJ2                             | 1.60E-007 | BamB  | YP_980966.1    | Pyrrolo-quinoline quinone                             |
| Polaromonas naphthalenivorans CJ2                             | 3.60E-007 | BamB  | YP_983227.1    | Pyrrolo-quinoline quinone                             |
| Polaromonas naphthalenivorans CJ2                             | 4.00E-007 | BamC  | YP_981431.1    | NlpB/DapX family lipoprotein                          |
| Polaromonas naphthalenivorans CJ2                             | 9.50E-070 | BamD  | YP_982095.1    | hypothetical protein Pnap_1864                        |
| Polaromonas naphthalenivorans CJ2                             | 4.30E-011 | BamE  | YP_984007.1    | SmpA/OmlA domain-containing protein                   |
| Polaromonas naphthalenivorans CJ2                             | 5.30E-006 | BamE  | YP_980514.1    | putative lipoprotein transmembrane                    |
| Polaromonas naphthalenivorans CJ2                             | 7.90E-173 | Omp85 | YP_981997.1    | surface antigen (D15)                                 |
| Polaromonas naphthalenivorans CJ2                             | 2.20E-005 | Omp85 | YP_981095.1    | surface antigen (D15)                                 |
| Polaromonas sp. JS666                                         | 1.70E-063 | BamB  | YP_549419.1    | Pyrrolo-quinoline quinone                             |
| Polaromonas sp. JS666                                         | 1.80E-007 | BamB  | YP_552059.1    | Pyrrolo-quinoline quinone                             |
| Polaromonas sp. JS666                                         | 5.70E-008 | BamC  | YP_549983.1    | NlpBDapX lipoprotein                                  |
| Polaromonas sp. JS666                                         | 9.00E-066 | BamD  | YP_549430.1    | hypothetical protein Bpro_2616                        |
| Polaromonas sp. JS666                                         | 2.00E-010 | BamE  | YP_551390.1    | SmpA/OmlA                                             |
| Polaromonas sp. JS666                                         | 1.00E-006 | BamE  | YP_547250.1    | putative lipoprotein transmembrane                    |
| Polaromonas sp. JS666                                         | 6.40E-178 | Omp85 | YP_549501.1    | surface antigen (D15)                                 |
| Polaromonas sp. JS666                                         | 9.80E-005 | Omp85 | YP_548067.1    | surface antigen (D15)                                 |
| Polynucleobacter necessarius subsp. asymbioticus QLW-P1DMWA-1 | 3.10E-098 | BamB  | YP_001156066.1 | Pyrrolo-quinoline quinone                             |
| Polynucleobacter necessarius subsp. asymbioticus QLW-P1DMWA-1 | 9.30E-008 | BamC  | YP_001155630.1 | NlpB/DapX family lipoprotein                          |
| Polynucleobacter necessarius subsp. asymbioticus QLW-P1DMWA-1 | 9.80E-089 | BamD  | YP_001155700.1 | putative transmembrane protein                        |
| Polynucleobacter necessarius subsp. asymbioticus QLW-P1DMWA-1 | 1.30E-013 | BamE  | YP_001155015.1 | SmpA/OmlA domain-containing protein                   |
| Polynucleobacter necessarius subsp. asymbioticus QLW-P1DMWA-1 | 1.20E-175 | Omp85 | YP_001156221.1 | surface antigen (D15)                                 |
| Polynucleobacter necessarius subsp. necessarius STIR1         | 1.30E-105 | BamB  | YP_001797518.1 | outer membrane assembly lipoprotein YfgL              |
| Polynucleobacter necessarius subsp. necessarius STIR1         | 2.30E-009 | BamC  | YP_001797788.1 | NlpBDapX family lipoprotein                           |
| Polynucleobacter necessarius subsp. necessarius STIR1         | 6.40E-087 | BamD  | YP_001797734.1 | putative transmembrane protein                        |
| Polynucleobacter necessarius subsp. necessarius STIR1         | 2.70E-012 | BamE  | YP_001797161.1 | SmpA/OmlA domain-containing protein                   |
| Polynucleobacter necessarius subsp. necessarius STIR1         | 6.60E-005 | BamE  | YP_001798099.1 | CcmE/CycJ protein                                     |
| Polynucleobacter necessarius subsp. necessarius STIR1         | 3.50E-182 | Omp85 | YP_001797392.1 | outer membrane protein assembly complex, YaeT protein |
| Pusillimonas sp. T7-7                                         | 1.50E-097 | BamB  | YP_004416562.1 | putative quinoprotein                                 |
| Pusillimonas sp. T7-7                                         | 3.00E-005 | BamB  | YP_004418261.1 | hypothetical protein PT7_3097                         |
| Pusillimonas sp. T7-7                                         | 1.80E-007 | BamC  | YP_004415335.1 | lipoprotein                                           |
| Pusillimonas sp. T7-7                                         | 1.70E-082 | BamD  | YP_004415601.1 | competence lipoprotein                                |
| Pusillimonas sp. T7-7                                         | 7.40E-026 | BamE  | YP_004417102.1 | outer membrane lipoprotein                            |
| Pusillimonas sp. T7-7                                         | 5.70E-008 | BamE  | YP_004417684.1 | lipoprotein PlpD                                      |
| Pusillimonas sp. T7-7                                         | 4.80E-189 | Omp85 | YP_004416198.1 | surface antigen                                       |
| Ralstonia eutropha H16                                        | 7.90E-158 | BamB  | YP_726824.1    | hypothetical protein H16_A2361                        |
| Ralstonia eutropha H16                                        | 1.00E-006 | BamB  | YP_726353.1    | dehydrogenase, PQQ dependent                          |
| Ralstonia eutropha H16                                        | 3.80E-007 | BamB  | YP_840568.1    | quininate dehydrogenase (PQQ)                         |
| Ralstonia eutropha H16                                        | 3.40E-007 | BamC  | YP_725714.1    | uncharacterized lipoprotein                           |

|                                |           |       |                |                                                       |
|--------------------------------|-----------|-------|----------------|-------------------------------------------------------|
| Ralstonia eutropha H16         | 3.30E-100 | BamD  | YP_725936.1    | DNA uptake lipoprotein                                |
| Ralstonia eutropha H16         | 3.80E-018 | BamE  | YP_727585.1    | lipoprotein                                           |
| Ralstonia eutropha H16         | 3.30E-005 | BamE  | YP_727398.1    | putative lipoprotein                                  |
| Ralstonia eutropha H16         | 3.90E-231 | Omp85 | YP_726515.1    | outer membrane protein, surface antigen OMA87         |
| Ralstonia eutropha H16         | 4.90E-005 | Omp85 | YP_727400.1    | outer membrane protein                                |
| Ralstonia eutropha JMP134      | 1.30E-163 | BamB  | YP_296291.1    | Pyrrolo-quinoline quinone                             |
| Ralstonia eutropha JMP134      | 1.80E-007 | BamB  | YP_295675.1    | Pyrrolo-quinoline quinone                             |
| Ralstonia eutropha JMP134      | 2.00E-007 | BamB  | YP_295993.1    | Pyrrolo-quinoline quinone                             |
| Ralstonia eutropha JMP134      | 2.00E-007 | BamB  | YP_298358.1    | Pyrrolo-quinoline quinone:cytochrome c, class I       |
| Ralstonia eutropha JMP134      | 1.10E-006 | BamB  | YP_299608.1    | Pyrrolo-quinoline quinone                             |
| Ralstonia eutropha JMP134      | 2.00E-006 | BamC  | YP_295327.1    | transmembrane protein                                 |
| Ralstonia eutropha JMP134      | 4.20E-100 | BamD  | YP_295557.1    | transmembrane protein                                 |
| Ralstonia eutropha JMP134      | 2.20E-020 | BamE  | YP_297041.1    | SmpA/OmlA                                             |
| Ralstonia eutropha JMP134      | 3.10E-005 | BamE  | YP_294899.1    | lipoprotein                                           |
| Ralstonia eutropha JMP134      | 2.60E-006 | BamE  | YP_300034.1    | OmpA/MotB:SmpA/OmlA                                   |
| Ralstonia eutropha JMP134      | 7.40E-005 | BamE  | YP_298397.1    | transmembrane protein                                 |
| Ralstonia eutropha JMP134      | 2.70E-226 | Omp85 | YP_296082.1    | surface antigen (D15):surface antigen variable number |
| Ralstonia eutropha JMP134      | 1.70E-005 | Omp85 | YP_294897.1    | surface antigen (D15)                                 |
| Ralstonia pickettii 12D        | 2.80E-214 | BamB  | YP_002981118.1 | outer membrane assembly lipoprotein YfgL              |
| Ralstonia pickettii 12D        | 8.80E-008 | BamB  | YP_002982049.1 | PQQ-dependent dehydrogenase                           |
| Ralstonia pickettii 12D        | 2.50E-006 | BamC  | YP_002981048.1 | NlpBDapX family lipoprotein                           |
| Ralstonia pickettii 12D        | 7.60E-102 | BamD  | YP_002981548.1 | outer membrane assembly lipoprotein YfiO              |
| Ralstonia pickettii 12D        | 2.90E-023 | BamE  | YP_002982518.1 | SmpA/OmlA domain-containing protein                   |
| Ralstonia pickettii 12D        | 5.60E-005 | BamE  | YP_002981852.1 | hypothetical protein Rpic12D_1899                     |
| Ralstonia pickettii 12D        | 8.20E-005 | BamE  | YP_002982137.1 | lipoprotein                                           |
| Ralstonia pickettii 12D        | 1.60E-211 | Omp85 | YP_002981311.1 | outer membrane protein assembly complex, YaeT protein |
| Ralstonia pickettii 12D        | 1.80E-005 | Omp85 | YP_002982139.1 | surface antigen (D15)                                 |
| Ralstonia pickettii 12J        | 5.50E-213 | BamB  | YP_001898642.1 | outer membrane assembly lipoprotein YfgL              |
| Ralstonia pickettii 12J        | 5.20E-008 | BamB  | YP_001900058.1 | PQQ-dependent dehydrogenase                           |
| Ralstonia pickettii 12J        | 3.20E-006 | BamC  | YP_001898568.1 | NlpBDapX family lipoprotein                           |
| Ralstonia pickettii 12J        | 4.30E-098 | BamD  | YP_001899487.1 | outer membrane assembly lipoprotein YfiO              |
| Ralstonia pickettii 12J        | 1.60E-020 | BamE  | YP_001900540.1 | SmpA/OmlA domain-containing protein                   |
| Ralstonia pickettii 12J        | 7.40E-005 | BamE  | YP_001900154.1 | putative lipoprotein                                  |
| Ralstonia pickettii 12J        | 8.80E-005 | BamE  | YP_001899788.1 | hypothetical protein Rpic_2222                        |
| Ralstonia pickettii 12J        | 2.10E-217 | Omp85 | YP_001898862.1 | outer membrane protein assembly complex, YaeT protein |
| Ralstonia pickettii 12J        | 1.80E-005 | Omp85 | YP_001900156.1 | surface antigen (D15)                                 |
| Ralstonia solanacearum GMI1000 | 1.60E-193 | BamB  | NP_519339.1    | lipoprotein transmembrane                             |
| Ralstonia solanacearum GMI1000 | 4.60E-006 | BamC  | NP_519267.1    | hypothetical protein RSc1146                          |

|                                       |           |       |                |                                                          |
|---------------------------------------|-----------|-------|----------------|----------------------------------------------------------|
| Ralstonia solanacearum GMI1000        | 7.40E-103 | BamD  | NP_519748.1    | hypothetical protein RSc1627                             |
| Ralstonia solanacearum GMI1000        | 5.00E-024 | BamE  | NP_520867.1    | lipoprotein transmembrane                                |
| Ralstonia solanacearum GMI1000        | 5.40E-005 | BamE  | NP_520503.1    | lipoprotein                                              |
| Ralstonia solanacearum GMI1000        | 7.60E-005 | BamE  | NP_520192.1    | hypothetical protein RSc2071                             |
| Ralstonia solanacearum GMI1000        | 1.00E-217 | Omp85 | NP_519533.1    | outer membrane signal peptide protein                    |
| Ralstonia solanacearum GMI1000        | 2.50E-005 | Omp85 | NP_520505.1    | lipoprotein                                              |
| Ramlibacter tataouinensis TTB310      | 9.70E-055 | BamB  | YP_004619007.1 | hypothetical protein Rta_18970                           |
| Ramlibacter tataouinensis TTB310      | 1.60E-007 | BamC  | YP_004619688.1 | hypothetical protein Rta_25710                           |
| Ramlibacter tataouinensis TTB310      | 3.20E-017 | BamE  | YP_004617310.1 | Outer membrane lipoprotein omlA                          |
| Ramlibacter tataouinensis TTB310      | 7.10E-174 | Omp85 | YP_004618860.1 | Outer membrane protein insertion machinery protein Omp85 |
| Ramlibacter tataouinensis TTB310      | 4.40E-005 | Omp85 | YP_004619657.1 | hypothetical protein Rta_25420                           |
| Rhodoferax ferrireducens T118         | 6.20E-040 | BamB  | YP_523553.1    | Pyrrrolo-quinoline quinone                               |
| Rhodoferax ferrireducens T118         | 5.30E-008 | BamC  | YP_523351.1    | NlpBDapX lipoprotein                                     |
| Rhodoferax ferrireducens T118         | 1.50E-090 | BamD  | YP_523564.1    | hypothetical protein Rfer_2315                           |
| Rhodoferax ferrireducens T118         | 4.90E-013 | BamE  | YP_522035.1    | SmpA/OmlA                                                |
| Rhodoferax ferrireducens T118         | 7.20E-182 | Omp85 | YP_523252.1    | surface antigen (D15)                                    |
| Taylorella equigenitalis MCE9         | 1.80E-058 | BamB  | YP_004130585.1 | Outer membrane protein YfgL                              |
| Taylorella equigenitalis MCE9         | 1.10E-056 | BamD  | YP_004129144.1 | component of the lipoprotein assembly complex protein    |
| Taylorella equigenitalis MCE9         | 8.10E-005 | BamD  | YP_004130052.1 | TPR repeat containing exported protein                   |
| Taylorella equigenitalis MCE9         | 1.30E-015 | BamE  | YP_004129314.1 | Outer membrane lipoprotein SmpA                          |
| Taylorella equigenitalis MCE9         | 1.60E-006 | BamE  | YP_004129769.1 | Outer membrane protein A precursor                       |
| Taylorella equigenitalis MCE9         | 1.30E-148 | Omp85 | YP_004130465.1 | Outer membrane protein assembly factor YaeT precursor    |
| Thauera sp. MZ1T                      | 1.10E-098 | BamB  | YP_002890358.1 | outer membrane assembly lipoprotein YfgL                 |
| Thauera sp. MZ1T                      | 1.10E-007 | BamB  | YP_002889793.1 | methanol/ethanol family PQQ-dependent dehydrogenase      |
| Thauera sp. MZ1T                      | 3.00E-007 | BamC  | YP_002889981.1 | lipoprotein                                              |
| Thauera sp. MZ1T                      | 3.30E-099 | BamD  | YP_002890102.1 | outer membrane assembly lipoprotein YfiO                 |
| Thauera sp. MZ1T                      | 2.80E-030 | BamE  | YP_002355377.1 | SmpA/OmlA domain-containing protein                      |
| Thauera sp. MZ1T                      | 5.10E-223 | Omp85 | YP_002355806.1 | outer membrane protein assembly complex, YaeT protein    |
| Thauera sp. MZ1T                      | 7.60E-006 | Omp85 | YP_002355065.1 | surface antigen (D15)                                    |
| Thiobacillus denitrificans ATCC 25259 | 7.70E-089 | BamB  | YP_314355.1    | pyrrrolo-quinoline quinone                               |
| Thiobacillus denitrificans ATCC 25259 | 6.10E-007 | BamC  | YP_314857.1    | lipoprotein                                              |
| Thiobacillus denitrificans ATCC 25259 | 2.60E-107 | BamD  | YP_314567.1    | putative competence lipoprotein                          |
| Thiobacillus denitrificans ATCC 25259 | 3.00E-005 | BamD  | YP_315962.1    | TPR repeat-containing protein                            |
| Thiobacillus denitrificans ATCC 25259 | 4.40E-025 | BamE  | YP_314882.1    | hypothetical protein Tbd_1124                            |
| Thiobacillus denitrificans ATCC 25259 | 5.10E-235 | Omp85 | YP_314551.1    | surface antigen (D15)                                    |
| Thiobacillus denitrificans ATCC 25259 | 3.30E-005 | Omp85 | YP_314591.1    | hypothetical protein Tbd_0833                            |
| Thiomonas intermedia K12              | 1.40E-056 | BamB  | YP_003643471.1 | outer membrane assembly lipoprotein YfgL                 |
| Thiomonas intermedia K12              | 4.20E-008 | BamC  | YP_003642510.1 | NlpBDapX family lipoprotein                              |

## beta\_e-5

|                           |           |       |                |                                                                                   |
|---------------------------|-----------|-------|----------------|-----------------------------------------------------------------------------------|
| Thiomonas intermedia K12  | 9.40E-089 | BamD  | YP_003643029.1 | outer membrane assembly lipoprotein YfiO                                          |
| Thiomonas intermedia K12  | 2.20E-020 | BamE  | YP_003641783.1 | SmpA/OmlA domain protein                                                          |
| Thiomonas intermedia K12  | 3.70E-183 | Omp85 | YP_003643813.1 | outer membrane protein assembly complex, YaeT protein                             |
| Thiomonas intermedia K12  | 1.40E-005 | Omp85 | YP_003644636.1 | surface antigen (D15)                                                             |
| Variovorax paradoxus EPS  | 4.10E-051 | BamB  | YP_004155995.1 | outer membrane assembly lipoprotein yfgI                                          |
| Variovorax paradoxus EPS  | 3.70E-008 | BamB  | YP_004157993.1 | pqq-dependent dehydrogenase                                                       |
| Variovorax paradoxus EPS  | 6.50E-005 | BamB  | YP_004157998.1 | membrane-bound pqq-dependent dehydrogenase,<br>glucose/quininate/shikimate family |
| Variovorax paradoxus EPS  | 7.40E-008 | BamC  | YP_004154497.1 | nlpbdapx family lipoprotein                                                       |
| Variovorax paradoxus EPS  | 1.10E-079 | BamD  | YP_004156006.1 | outer membrane assembly lipoprotein yfio                                          |
| Variovorax paradoxus EPS  | 5.00E-012 | BamE  | YP_004152767.1 | smpa/omla domain-containing protein                                               |
| Variovorax paradoxus EPS  | 5.80E-006 | BamE  | YP_004156216.1 | hypothetical protein Varpa_3932                                                   |
| Variovorax paradoxus EPS  | 2.00E-164 | Omp85 | YP_004155615.1 | outer membrane protein assembly complex, yaet protein                             |
| Variovorax paradoxus EPS  | 1.80E-156 | Omp85 | YP_004157140.1 | outer membrane protein assembly complex, yaet protein                             |
| Variovorax paradoxus S110 | 7.20E-055 | BamB  | YP_002944091.1 | outer membrane assembly lipoprotein YfgL                                          |
| Variovorax paradoxus S110 | 9.00E-008 | BamB  | YP_002946886.1 | PQQ-dependent dehydrogenase                                                       |
| Variovorax paradoxus S110 | 1.40E-005 | BamB  | YP_002944925.1 | PQQ-dependent dehydrogenase                                                       |
| Variovorax paradoxus S110 | 1.80E-005 | BamB  | YP_002942620.1 | PQQ-dependent dehydrogenase                                                       |
| Variovorax paradoxus S110 | 8.70E-005 | BamB  | YP_002946888.1 | membrane-bound PQQ-dependent dehydrogenase,<br>glucose/quininate/shikimate family |
| Variovorax paradoxus S110 | 7.30E-008 | BamB  | YP_002948071.1 | PQQ-dependent dehydrogenase, methanol/ethanol family                              |
| Variovorax paradoxus S110 | 5.30E-008 | BamC  | YP_002945316.1 | NlpBDapX family lipoprotein                                                       |
| Variovorax paradoxus S110 | 4.60E-079 | BamD  | YP_002944080.1 | outer membrane assembly lipoprotein YfiO                                          |
| Variovorax paradoxus S110 | 2.20E-013 | BamE  | YP_002942336.1 | SmpA/OmlA domain-containing protein                                               |
| Variovorax paradoxus S110 | 5.50E-005 | BamE  | YP_002947419.1 | OmpA/MotB domain protein                                                          |
| Variovorax paradoxus S110 | 7.60E-166 | Omp85 | YP_002944498.1 | outer membrane protein assembly complex, YaeT protein                             |
| Variovorax paradoxus S110 | 2.60E-162 | Omp85 | YP_002946133.1 | outer membrane protein assembly complex, YaeT protein                             |

## delta\_e-5

|                                     |           |       |                |                                                       |
|-------------------------------------|-----------|-------|----------------|-------------------------------------------------------|
| Anaeromyxobacter dehalogenans 2CP-1 | 1.70E-014 | BamB  | YP_002492694.1 | Pyrrolo-quinoline quinone                             |
| Anaeromyxobacter dehalogenans 2CP-1 | 1.80E-006 | BamB  | YP_002492718.1 | Pyrrolo-quinoline quinone                             |
| Anaeromyxobacter dehalogenans 2CP-1 | 2.70E-015 | BamD  | YP_002493908.1 | outer membrane assembly lipoprotein YfiO              |
| Anaeromyxobacter dehalogenans 2CP-1 | 5.50E-097 | Omp85 | YP_002491619.1 | outer membrane protein assembly complex, YaeT protein |
| Anaeromyxobacter dehalogenans 2CP-1 | 2.40E-010 | Omp85 | YP_002491110.1 | surface antigen (D15)                                 |
| Anaeromyxobacter dehalogenans 2CP-1 | 1.50E-005 | Omp85 | YP_002490608.1 | surface antigen (D15)                                 |
| Anaeromyxobacter dehalogenans 2CP-C | 6.80E-015 | BamB  | YP_464866.1    | PQQ repeat-containing protein                         |
| Anaeromyxobacter dehalogenans 2CP-C | 1.50E-006 | BamB  | YP_464844.1    | WD-40 repeat-containing protein                       |
| Anaeromyxobacter dehalogenans 2CP-C | 6.10E-005 | BamB  | YP_467411.1    | hypothetical protein Adeh_4210                        |
| Anaeromyxobacter dehalogenans 2CP-C | 3.60E-015 | BamD  | YP_466570.1    | hypothetical protein Adeh_3366                        |
| Anaeromyxobacter dehalogenans 2CP-C | 2.90E-101 | Omp85 | YP_464293.1    | surface antigen (D15)                                 |
| Anaeromyxobacter dehalogenans 2CP-C | 3.80E-010 | Omp85 | YP_463867.1    | surface antigen (D15)                                 |
| Anaeromyxobacter dehalogenans 2CP-C | 3.00E-005 | Omp85 | YP_463378.1    | surface antigen variable number                       |
| Anaeromyxobacter sp. Fw109-5        | 4.70E-014 | BamB  | YP_001379339.1 | Pyrrolo-quinoline quinone                             |
| Anaeromyxobacter sp. Fw109-5        | 1.00E-005 | BamB  | YP_001379363.1 | Pyrrolo-quinoline quinone                             |
| Anaeromyxobacter sp. Fw109-5        | 4.70E-005 | BamB  | YP_001381520.1 | hypothetical protein Anae109_4358                     |
| Anaeromyxobacter sp. Fw109-5        | 4.80E-014 | BamD  | YP_001380598.1 | tetratricopeptide domain-containing protein           |
| Anaeromyxobacter sp. Fw109-5        | 2.00E-119 | Omp85 | YP_001378312.1 | surface antigen (D15)                                 |
| Anaeromyxobacter sp. Fw109-5        | 2.90E-010 | Omp85 | YP_001377896.1 | surface antigen (D15)                                 |
| Anaeromyxobacter sp. Fw109-5        | 1.50E-005 | Omp85 | YP_001377375.1 | surface antigen (D15)                                 |
| Anaeromyxobacter sp. K              | 2.30E-014 | BamB  | YP_002134558.1 | pyrrolo-quinoline quinone                             |
| Anaeromyxobacter sp. K              | 1.90E-006 | BamB  | YP_002134582.1 | pyrrolo-quinoline quinone                             |
| Anaeromyxobacter sp. K              | 7.90E-005 | BamB  | YP_002136674.1 | pyrrolo-quinoline quinone                             |
| Anaeromyxobacter sp. K              | 3.10E-015 | BamD  | YP_002135790.1 | outer membrane assembly lipoprotein YfiO              |
| Anaeromyxobacter sp. K              | 9.20E-097 | Omp85 | YP_002133502.1 | outer membrane protein assembly complex, YaeT protein |
| Anaeromyxobacter sp. K              | 1.90E-010 | Omp85 | YP_002133056.1 | surface antigen (D15)                                 |
| Anaeromyxobacter sp. K              | 1.30E-005 | Omp85 | YP_002132544.1 | surface antigen (D15)                                 |
| Bdellovibrio bacteriovorus HD100    | 2.40E-016 | BamB  | NP_968885.1    | putative lipoprotein                                  |
| Bdellovibrio bacteriovorus HD100    | 4.30E-008 | BamB  | NP_969656.1    | putative serine/threonine protein kinase              |
| Bdellovibrio bacteriovorus HD100    | 4.80E-015 | BamD  | NP_967143.1    | competence protein ComL                               |
| Bdellovibrio bacteriovorus HD100    | 1.20E-005 | BamD  | NP_969287.1    | hypothetical protein Bd2474                           |
| Bdellovibrio bacteriovorus HD100    | 1.80E-005 | BamD  | NP_967036.1    | hypothetical protein Bd0006                           |
| Bdellovibrio bacteriovorus HD100    | 9.70E-005 | BamD  | NP_968052.1    | putative soluble lytic transglycosylase               |
| Bdellovibrio bacteriovorus HD100    | 4.00E-005 | BamE  | NP_967278.1    | putative lipoprotein                                  |
| Bdellovibrio bacteriovorus HD100    | 0.00E+000 | Omp85 | NP_969304.1    | surface antigen                                       |
| Bdellovibrio bacteriovorus HD100    | 1.70E-128 | Omp85 | NP_968381.1    | hypothetical protein Bd1493                           |
| Desulfarculus baarsii DSM 2075      | 4.00E-015 | BamD  | YP_003807100.1 | outer membrane assembly lipoprotein YfiO              |
| Desulfarculus baarsii DSM 2075      | 1.90E-005 | BamD  | YP_003806871.1 | hypothetical protein Deba_0907                        |

|                                      |           |       |                |                                                                              |
|--------------------------------------|-----------|-------|----------------|------------------------------------------------------------------------------|
| Desulfarculus baarsii DSM 2075       | 2.90E-005 | BamD  | YP_003807855.1 | hypothetical protein Deba_1896                                               |
| Desulfarculus baarsii DSM 2075       | 3.10E-176 | Omp85 | YP_003808068.1 | outer membrane protein assembly complex, YaeT protein                        |
| Desulfarculus baarsii DSM 2075       | 9.60E-008 | Omp85 | YP_003806803.1 | surface antigen (D15)                                                        |
| Desulfatibacillum alkenivorans AK-01 | 1.40E-015 | BamD  | YP_002431565.1 | outer membrane assembly lipoprotein YfiO                                     |
| Desulfatibacillum alkenivorans AK-01 | 2.10E-005 | BamD  | YP_002430976.1 | hypothetical protein Dalk_1811                                               |
| Desulfatibacillum alkenivorans AK-01 | 5.30E-005 | BamD  | YP_002432857.1 | branched-chain amino acid ABC transporter periplasmic protein                |
| Desulfatibacillum alkenivorans AK-01 | 5.40E-005 | BamD  | YP_002429311.1 | hypothetical protein Dalk_0133                                               |
| Desulfatibacillum alkenivorans AK-01 | 7.00E-005 | BamD  | YP_002432757.1 | hypothetical protein Dalk_3601                                               |
| Desulfatibacillum alkenivorans AK-01 | 7.90E-153 | Omp85 | YP_002430952.1 | outer membrane protein assembly complex, YaeT protein                        |
| Desulfatibacillum alkenivorans AK-01 | 1.30E-006 | Omp85 | YP_002432353.1 | surface antigen (D15)                                                        |
| Desulfobacca acetoxidans DSM 11109   | 6.50E-014 | BamD  | YP_004369248.1 | outer membrane assembly lipoprotein YfiO                                     |
| Desulfobacca acetoxidans DSM 11109   | 4.70E-005 | BamD  | YP_004369366.1 | hypothetical protein Desac_0294                                              |
| Desulfobacca acetoxidans DSM 11109   | 9.40E-005 | BamD  | YP_004370349.1 | hypothetical protein Desac_1311                                              |
| Desulfobacca acetoxidans DSM 11109   | 3.10E-005 | BamE  | YP_004371168.1 | hypothetical protein Desac_2158                                              |
| Desulfobacca acetoxidans DSM 11109   | 4.50E-005 | BamE  | YP_004371862.1 | SmpA protein                                                                 |
| Desulfobacca acetoxidans DSM 11109   | 1.80E-169 | Omp85 | YP_004371714.1 | outer membrane protein assembly complex, YaeT protein                        |
| Desulfobacca acetoxidans DSM 11109   | 7.60E-008 | Omp85 | YP_004371088.1 | surface antigen (D15)                                                        |
| Desulfobacterium autotrophicum HRM2  | 1.00E-012 | BamD  | YP_002602507.1 | putative DNA uptake lipoprotein                                              |
| Desulfobacterium autotrophicum HRM2  | 7.30E-005 | BamD  | YP_002604956.1 | TPR repeat family protein                                                    |
| Desulfobacterium autotrophicum HRM2  | 7.90E-005 | BamD  | YP_002603523.1 | TPR domain protein                                                           |
| Desulfobacterium autotrophicum HRM2  | 6.00E-143 | Omp85 | YP_002603503.1 | outer membrane protein (putative surface antigen)                            |
| Desulfobacterium autotrophicum HRM2  | 6.80E-009 | Omp85 | YP_002603845.1 | putative outer membrane surface antigen protein                              |
| Desulfobulbus propionicus DSM 2032   | 8.70E-016 | BamD  | YP_004196379.1 | outer membrane assembly lipoprotein YfiO                                     |
| Desulfobulbus propionicus DSM 2032   | 9.50E-005 | BamD  | YP_004193798.1 | TPR repeat-containing protein                                                |
| Desulfobulbus propionicus DSM 2032   | 3.50E-006 | BamE  | YP_004196300.1 | hypothetical protein Despr_2875                                              |
| Desulfobulbus propionicus DSM 2032   | 4.10E-180 | Omp85 | YP_004194043.1 | outer membrane protein assembly complex, YaeT protein                        |
| Desulfobulbus propionicus DSM 2032   | 2.50E-006 | Omp85 | YP_004196024.1 | surface antigen (D15)                                                        |
| Desulfococcus oleovorans Hxd3        | 2.30E-017 | BamD  | YP_001529936.1 | DNA uptake lipoprotein-like protein                                          |
| Desulfococcus oleovorans Hxd3        | 8.60E-006 | BamD  | YP_001528935.1 | response regulator receiver protein                                          |
| Desulfococcus oleovorans Hxd3        | 2.70E-005 | BamD  | YP_001529644.1 | branched-chain amino acid ABC transporter periplasmic component-like protein |
| Desulfococcus oleovorans Hxd3        | 3.10E-005 | BamD  | YP_001529463.1 | hypothetical protein Dole_1582                                               |
| Desulfococcus oleovorans Hxd3        | 3.50E-005 | BamE  | YP_001530928.1 | hypothetical protein Dole_3048                                               |
| Desulfococcus oleovorans Hxd3        | 1.90E-166 | Omp85 | YP_001530724.1 | surface antigen (D15)                                                        |
| Desulfohalobium retbaense DSM 5692   | 1.30E-014 | BamD  | YP_003198768.1 | outer membrane assembly lipoprotein YfiO                                     |
| Desulfohalobium retbaense DSM 5692   | 6.40E-007 | BamE  | YP_003197823.1 | hypothetical protein Dret_0957                                               |
| Desulfohalobium retbaense DSM 5692   | 3.20E-243 | Omp85 | YP_003199093.1 | outer membrane protein assembly complex, YaeT protein                        |
| Desulfohalobium retbaense DSM 5692   | 1.20E-006 | Omp85 | YP_003197308.1 | surface antigen (D15)                                                        |



## delta\_e-5

|                                                           |           |       |                |                                                       |
|-----------------------------------------------------------|-----------|-------|----------------|-------------------------------------------------------|
| Desulfomicrobium baculatum DSM 4028                       | 9.30E-016 | BamD  | YP_003157659.1 | outer membrane assembly lipoprotein YfiO              |
| Desulfomicrobium baculatum DSM 4028                       | 3.90E-005 | BamE  | YP_003158026.1 | lipoprotein                                           |
| Desulfomicrobium baculatum DSM 4028                       | 1.20E-246 | Omp85 | YP_003159869.1 | outer membrane protein assembly complex, YaeT protein |
| Desulfomicrobium baculatum DSM 4028                       | 2.30E-005 | Omp85 | YP_003156956.1 | surface antigen (D15)                                 |
| Desulfotalea psychrophila LSV54                           | 4.30E-018 | BamD  | YP_064544.1    | hypothetical protein DP0808                           |
| Desulfotalea psychrophila LSV54                           | 9.30E-109 | Omp85 | YP_064017.1    | outer membrane protein                                |
| Desulfotalea psychrophila LSV54                           | 8.50E-005 | Omp85 | YP_065180.1    | hypothetical protein DP1444                           |
| Desulfovibrio aespoeensis Aspo-2                          | 4.90E-014 | BamD  | YP_004121580.1 | outer membrane assembly lipoprotein YfiO              |
| Desulfovibrio aespoeensis Aspo-2                          | 9.20E-005 | BamE  | YP_004122495.1 | CHASE4 domain-containing protein                      |
| Desulfovibrio aespoeensis Aspo-2                          | 1.10E-184 | Omp85 | YP_004121159.1 | outer membrane protein assembly complex protein YaeT  |
| Desulfovibrio alaskensis G20                              | 1.10E-014 | BamD  | YP_388557.1    | outer membrane assembly lipoprotein YfiO              |
| Desulfovibrio alaskensis G20                              | 0.00E+000 | Omp85 | YP_387864.1    | outer membrane protein assembly complex, YaeT protein |
| Desulfovibrio desulfuricans subsp. desulfuricans str. ATC | 2.80E-017 | BamD  | YP_002479783.1 | outer membrane assembly lipoprotein YfiO              |
| Desulfovibrio desulfuricans subsp. desulfuricans str. ATC | 1.10E-193 | Omp85 | YP_002479198.1 | outer membrane protein assembly complex, YaeT protein |
| Desulfovibrio desulfuricans subsp. desulfuricans str. ATC | 8.00E-007 | Omp85 | YP_002479055.1 | surface antigen (D15)                                 |
| Desulfovibrio magneticus RS-1                             | 1.10E-015 | BamD  | YP_002953544.1 | hypothetical protein DMR_21670                        |
| Desulfovibrio magneticus RS-1                             | 2.40E-188 | Omp85 | YP_002955231.1 | hypothetical protein DMR_38540                        |
| Desulfovibrio magneticus RS-1                             | 6.30E-006 | Omp85 | YP_002954928.1 | hypothetical protein DMR_35510                        |
| Desulfovibrio salexigens DSM 2638                         | 9.20E-015 | BamD  | YP_002991420.1 | outer membrane assembly lipoprotein YfiO              |
| Desulfovibrio salexigens DSM 2638                         | 3.50E-005 | BamD  | YP_002991976.1 | hypothetical protein Desal_2381                       |
| Desulfovibrio salexigens DSM 2638                         | 1.90E-233 | Omp85 | YP_002992119.1 | outer membrane protein assembly complex, YaeT protein |
| Desulfovibrio vulgaris DP4                                | 1.80E-013 | BamD  | YP_966770.1    | lipoprotein                                           |
| Desulfovibrio vulgaris DP4                                | 8.50E-259 | Omp85 | YP_966339.1    | surface antigen (D15)                                 |
| Desulfovibrio vulgaris DP4                                | 3.10E-007 | Omp85 | YP_966576.1    | surface antigen (D15)                                 |
| Desulfovibrio vulgaris str. 'Miyazaki F'                  | 7.10E-014 | BamD  | YP_002434825.1 | lipoprotein                                           |
| Desulfovibrio vulgaris str. 'Miyazaki F'                  | 1.80E-259 | Omp85 | YP_002437401.1 | outer membrane protein assembly complex, YaeT protein |
| Desulfovibrio vulgaris str. 'Miyazaki F'                  | 2.40E-006 | Omp85 | YP_002437310.1 | surface antigen (D15)                                 |
| Desulfovibrio vulgaris str. Hildenborough                 | 1.80E-013 | BamD  | YP_011054.1    | competence protein                                    |
| Desulfovibrio vulgaris str. Hildenborough                 | 1.90E-247 | Omp85 | YP_011586.2    | OMP85 family outer membrane protein                   |
| Desulfovibrio vulgaris str. Hildenborough                 | 2.90E-007 | Omp85 | YP_011315.1    | OMP85 family outer membrane protein                   |
| Desulfurivibrio alkaliphilus AHT2                         | 1.40E-014 | BamD  | YP_003690951.1 | outer membrane assembly lipoprotein YfiO              |
| Desulfurivibrio alkaliphilus AHT2                         | 1.50E-005 | BamD  | YP_003690510.1 | hypothetical protein                                  |
| Desulfurivibrio alkaliphilus AHT2                         | 5.40E-183 | Omp85 | YP_003690623.1 | outer membrane protein assembly complex, YaeT protein |
| Desulfurivibrio alkaliphilus AHT2                         | 4.50E-008 | Omp85 | YP_003691426.1 | surface antigen (D15)                                 |
| Geobacter bemidjiensis Bem                                | 1.10E-012 | BamD  | YP_002137300.1 | outer membrane protein assembly lipoprotein YfiO      |
| Geobacter bemidjiensis Bem                                | 9.80E-006 | BamD  | YP_002140778.2 | peptidoglycan L,D-transpeptidase lipoprotein          |
| Geobacter bemidjiensis Bem                                | 3.00E-005 | BamD  | YP_002139406.1 | lytic transglycosylase domain-containing protein      |
| Geobacter bemidjiensis Bem                                | 6.80E-005 | BamD  | YP_002140391.1 | lipoprotein                                           |

## delta\_e-5

|                                 |           |       |                |                                                       |
|---------------------------------|-----------|-------|----------------|-------------------------------------------------------|
| Geobacter bemidjiensis Bem      | 3.40E-131 | Omp85 | YP_002137658.2 | outer membrane protein assembly complex protein YaeT  |
| Geobacter bemidjiensis Bem      | 8.80E-007 | Omp85 | YP_002139973.1 | outer membrane surface protein                        |
| Geobacter lovleyi SZ            | 2.50E-016 | BamD  | YP_001953178.1 | outer membrane assembly lipoprotein YfiO              |
| Geobacter lovleyi SZ            | 1.70E-005 | BamD  | YP_001951255.1 | hypothetical protein Glov_1012                        |
| Geobacter lovleyi SZ            | 8.10E-005 | BamE  | YP_001951007.1 | outer membrane chaperone Skp                          |
| Geobacter lovleyi SZ            | 1.30E-127 | Omp85 | YP_001951006.1 | outer membrane protein assembly complex, YaeT protein |
| Geobacter metallireducens GS-15 | 3.10E-013 | BamD  | YP_385954.1    | lipoprotein                                           |
| Geobacter metallireducens GS-15 | 1.70E-005 | BamD  | YP_384465.1    | tetratricopeptide TPR_4                               |
| Geobacter metallireducens GS-15 | 3.20E-005 | BamD  | YP_384986.1    | TPR repeat-containing protein                         |
| Geobacter metallireducens GS-15 | 7.30E-005 | BamD  | YP_386165.1    | hypothetical protein Gmet_3227                        |
| Geobacter metallireducens GS-15 | 1.50E-147 | Omp85 | YP_385307.1    | surface antigen (D15)                                 |
| Geobacter metallireducens GS-15 | 9.60E-007 | Omp85 | YP_385751.1    | surface antigen (D15)                                 |
| Geobacter sp. FRC-32            | 4.00E-011 | BamD  | YP_002536221.1 | outer membrane assembly lipoprotein YfiO              |
| Geobacter sp. FRC-32            | 7.00E-007 | BamD  | YP_002535606.1 | ErfK/YbiS/YcfS/YnhG family protein                    |
| Geobacter sp. FRC-32            | 1.20E-005 | BamD  | YP_002538427.1 | hypothetical protein Geob_2983                        |
| Geobacter sp. FRC-32            | 6.10E-005 | BamD  | YP_002538836.1 | Lytic transglycosylase catalytic                      |
| Geobacter sp. FRC-32            | 7.70E-005 | BamD  | YP_002536767.1 | chromosome segregation ATPase-like protein            |
| Geobacter sp. FRC-32            | 3.60E-006 | BamE  | YP_002536626.1 | hypothetical protein Geob_1165                        |
| Geobacter sp. FRC-32            | 2.10E-126 | Omp85 | YP_002537553.1 | outer membrane protein assembly complex, YaeT protein |
| Geobacter sp. FRC-32            | 5.70E-005 | Omp85 | YP_002535819.1 | surface antigen (D15)                                 |
| Geobacter sp. M18               | 5.30E-015 | BamD  | YP_004200601.1 | outer membrane assembly lipoprotein YfiO              |
| Geobacter sp. M18               | 1.50E-144 | Omp85 | YP_004197490.1 | outer membrane protein assembly complex, YaeT protein |
| Geobacter sp. M18               | 4.00E-007 | Omp85 | YP_004199890.1 | surface antigen (D15)                                 |
| Geobacter sp. M21               | 8.80E-013 | BamD  | YP_003020330.1 | outer membrane assembly lipoprotein YfiO              |
| Geobacter sp. M21               | 1.50E-005 | BamD  | YP_003023856.1 | ErfK/YbiS/YcfS/YnhG family protein                    |
| Geobacter sp. M21               | 2.50E-005 | BamD  | YP_003021437.1 | lytic transglycosylase catalytic                      |
| Geobacter sp. M21               | 1.60E-131 | Omp85 | YP_003023203.1 | hypothetical protein GM21_3421                        |
| Geobacter sp. M21               | 1.60E-006 | Omp85 | YP_003020906.1 | surface antigen (D15)                                 |
| Geobacter sulfurreducens PCA    | 9.00E-013 | BamD  | NP_951559.1    | lipoprotein                                           |
| Geobacter sulfurreducens PCA    | 1.20E-007 | BamD  | NP_951243.1    | lipoprotein                                           |
| Geobacter sulfurreducens PCA    | 1.20E-005 | BamD  | NP_952483.1    | hypothetical protein GSU1432                          |
| Geobacter sulfurreducens PCA    | 8.60E-136 | Omp85 | NP_953317.1    | outer membrane protein                                |
| Geobacter uraniireducens Rf4    | 6.40E-014 | BamD  | YP_001232724.1 | DNA uptake lipoprotein-like protein                   |
| Geobacter uraniireducens Rf4    | 3.50E-006 | BamD  | YP_001230919.1 | ErfK/YbiS/YcfS/YnhG family protein                    |
| Geobacter uraniireducens Rf4    | 8.30E-006 | BamD  | YP_001231119.1 | TPR repeat-containing protein                         |
| Geobacter uraniireducens Rf4    | 5.80E-005 | BamD  | YP_001231334.1 | TPR repeat-containing protein                         |
| Geobacter uraniireducens Rf4    | 9.00E-005 | BamD  | YP_001232418.1 | tetratricopeptide domain-containing protein           |
| Geobacter uraniireducens Rf4    | 7.80E-126 | Omp85 | YP_001231971.1 | surface antigen (D15)                                 |

|                                     |           |       |                |                                                                            |
|-------------------------------------|-----------|-------|----------------|----------------------------------------------------------------------------|
| Haliangium ochraceum DSM 14365      | 4.90E-024 | BamB  | YP_003268123.1 | pyrrolo-quinoline quinone                                                  |
| Haliangium ochraceum DSM 14365      | 1.70E-007 | BamB  | YP_003269343.1 | pyrrolo-quinoline quinone                                                  |
| Haliangium ochraceum DSM 14365      | 2.90E-005 | BamB  | YP_003265792.1 | WD40 repeat-containing protein                                             |
| Haliangium ochraceum DSM 14365      | 4.10E-015 | BamD  | YP_003269025.1 | outer membrane assembly lipoprotein YfiO                                   |
| Haliangium ochraceum DSM 14365      | 1.50E-109 | Omp85 | YP_003268364.1 | outer membrane protein assembly complex, YaeT protein                      |
| Haliangium ochraceum DSM 14365      | 8.80E-009 | Omp85 | YP_003268088.1 | surface antigen (D15)                                                      |
| Haliangium ochraceum DSM 14365      | 8.00E-007 | Omp85 | YP_003269643.1 | surface antigen (D15)                                                      |
| Hippea maritima DSM 10411           | 1.50E-012 | BamB  | YP_004340351.1 | hypothetical protein Hipma_1335                                            |
| Hippea maritima DSM 10411           | 9.00E-015 | BamD  | YP_004340303.1 | outer membrane assembly lipoprotein YfiO                                   |
| Hippea maritima DSM 10411           | 6.30E-094 | Omp85 | YP_004340308.1 | outer membrane protein assembly complex, YaeT protein                      |
| Lawsonia intracellularis PHE/MN1-00 | 1.30E-013 | BamD  | YP_594742.1    | DNA uptake lipoprotein                                                     |
| Lawsonia intracellularis PHE/MN1-00 | 1.20E-005 | BamD  | YP_595468.1    | Outer membrane protein and related peptidoglycan-associated (lipo)proteins |
| Lawsonia intracellularis PHE/MN1-00 | 8.80E-215 | Omp85 | YP_595399.1    | Outer membrane protein/protective antigen OMA87                            |
| Lawsonia intracellularis PHE/MN1-00 | 3.50E-006 | Omp85 | YP_595063.1    | Outer membrane protein                                                     |
| Myxococcus fulvus HW-1              | 4.10E-015 | BamB  | YP_004668368.1 | PQQ repeat-containing protein                                              |
| Myxococcus fulvus HW-1              | 2.80E-010 | BamB  | YP_004663248.1 | putative lipoprotein                                                       |
| Myxococcus fulvus HW-1              | 2.40E-006 | BamB  | YP_004668747.1 | hypothetical protein LILAB_28940                                           |
| Myxococcus fulvus HW-1              | 1.50E-005 | BamB  | YP_004668334.1 | PQQ repeat-containing protein                                              |
| Myxococcus fulvus HW-1              | 9.20E-005 | BamB  | YP_004664905.1 | putative lipoprotein                                                       |
| Myxococcus fulvus HW-1              | 4.50E-017 | BamD  | YP_004666537.1 | putative competence lipoprotein ComL                                       |
| Myxococcus fulvus HW-1              | 3.00E-107 | Omp85 | YP_004669277.1 | OMP85 family outer membrane protein                                        |
| Myxococcus fulvus HW-1              | 6.50E-009 | Omp85 | YP_004670214.1 | OMP85 family outer membrane protein                                        |
| Myxococcus fulvus HW-1              | 3.20E-005 | Omp85 | YP_004665828.1 | OMP85 family outer membrane protein                                        |
| Myxococcus xanthus DK 1622          | 7.60E-014 | BamB  | YP_631950.1    | PQQ repeat-containing protein                                              |
| Myxococcus xanthus DK 1622          | 6.40E-011 | BamB  | YP_629749.1    | PQQ repeat-containing protein                                              |
| Myxococcus xanthus DK 1622          | 7.30E-011 | BamB  | YP_629770.1    | lipoprotein                                                                |
| Myxococcus xanthus DK 1622          | 2.10E-006 | BamB  | YP_632331.1    | hypothetical protein MXAN_4156                                             |
| Myxococcus xanthus DK 1622          | 2.70E-005 | BamB  | YP_631914.1    | PQQ repeat-containing protein                                              |
| Myxococcus xanthus DK 1622          | 3.20E-005 | BamB  | YP_632305.1    | WD domain-/G-beta repeat-containing protein                                |
| Myxococcus xanthus DK 1622          | 2.80E-016 | BamD  | YP_630233.1    | competence lipoprotein ComL                                                |
| Myxococcus xanthus DK 1622          | 3.10E-005 | BamD  | YP_631209.1    | lipoprotein                                                                |
| Myxococcus xanthus DK 1622          | 1.20E-090 | Omp85 | YP_632890.1    | OMP85 family outer membrane protein                                        |
| Myxococcus xanthus DK 1622          | 1.10E-008 | Omp85 | YP_633900.1    | OMP85 family outer membrane protein                                        |
| Myxococcus xanthus DK 1622          | 3.70E-005 | Omp85 | YP_634587.1    | OMP85 family outer membrane protein                                        |
| Pelobacter carbinolicus DSM 2380    | 4.30E-013 | BamD  | YP_357792.1    | TPR domain-containing protein                                              |
| Pelobacter carbinolicus DSM 2380    | 1.50E-006 | BamD  | YP_355840.1    | hypothetical protein Pcar_0410                                             |
| Pelobacter carbinolicus DSM 2380    | 6.40E-006 | BamD  | YP_356927.1    | N-acetylmuramoyl-L-alanine amidase                                         |

## delta\_e-5

|                                   |           |       |                |                                       |
|-----------------------------------|-----------|-------|----------------|---------------------------------------|
| Pelobacter carbinolicus DSM 2380  | 4.70E-006 | BamE  | YP_842177.1    | hypothetical protein Pcar_3236        |
| Pelobacter carbinolicus DSM 2380  | 1.10E-125 | Omp85 | YP_356670.1    | putative outer membrane protein       |
| Pelobacter carbinolicus DSM 2380  | 1.90E-006 | Omp85 | YP_355619.1    | hypothetical protein Pcar_0188        |
| Pelobacter propionicus DSM 2379   | 1.60E-015 | BamD  | YP_902305.1    | hypothetical protein Ppro_2643        |
| Pelobacter propionicus DSM 2379   | 9.40E-007 | BamD  | YP_901519.1    | hypothetical protein Ppro_1849        |
| Pelobacter propionicus DSM 2379   | 8.90E-006 | BamD  | YP_900260.1    | ErfK/YbiS/YcfS/YnhG family protein    |
| Pelobacter propionicus DSM 2379   | 2.40E-005 | BamE  | YP_900637.1    | hypothetical protein Ppro_0950        |
| Pelobacter propionicus DSM 2379   | 7.40E-101 | Omp85 | YP_902672.1    | surface antigen (D15)                 |
| Pelobacter propionicus DSM 2379   | 1.30E-006 | Omp85 | YP_902916.1    | surface antigen (D15)                 |
| Sorangium cellulosum 'So ce 56'   | 1.60E-010 | BamB  | YP_001614232.1 | hypothetical protein sce3592          |
| Sorangium cellulosum 'So ce 56'   | 3.40E-008 | BamB  | YP_001614278.1 | hypothetical protein sce3638          |
| Sorangium cellulosum 'So ce 56'   | 4.10E-007 | BamB  | YP_001616046.1 | polyvinylalcohol dehydrogenase        |
| Sorangium cellulosum 'So ce 56'   | 6.10E-005 | BamB  | YP_001614270.1 | WD repeat-containing protein          |
| Sorangium cellulosum 'So ce 56'   | 2.30E-011 | BamD  | YP_001614236.1 | hypothetical protein sce3596          |
| Sorangium cellulosum 'So ce 56'   | 3.30E-112 | Omp85 | YP_001615093.1 | surface antigen                       |
| Sorangium cellulosum 'So ce 56'   | 5.40E-007 | Omp85 | YP_001611742.1 | hypothetical protein sce1105          |
| Sorangium cellulosum 'So ce 56'   | 4.50E-005 | Omp85 | YP_001611004.1 | surface antigen                       |
| Syntrophobacter fumaroxidans MPOB | 1.60E-014 | BamD  | YP_845832.1    | ComL family lipoprotein               |
| Syntrophobacter fumaroxidans MPOB | 7.80E-005 | BamD  | YP_845166.1    | extracellular ligand-binding receptor |
| Syntrophobacter fumaroxidans MPOB | 1.30E-166 | Omp85 | YP_847850.1    | surface antigen                       |
| Syntrophobacter fumaroxidans MPOB | 2.60E-008 | Omp85 | YP_844891.1    | surface antigen                       |

|                                                |           |       |                |                                                       |
|------------------------------------------------|-----------|-------|----------------|-------------------------------------------------------|
| Arcobacter butzleri RM4018                     | 4.60E-006 | BamD  | YP_001489527.1 | hypothetical protein Abu_0591                         |
| Arcobacter butzleri RM4018                     | 3.90E-031 | Omp85 | YP_001490140.1 | outer membrane surface antigen protein                |
| Arcobacter nitrofigilis DSM 7299               | 2.90E-009 | BamB  | YP_003656940.1 | PQQ-dependent dehydrogenase                           |
| Arcobacter nitrofigilis DSM 7299               | 2.10E-005 | BamD  | YP_003654997.1 | hypothetical protein Arnit_0826                       |
| Arcobacter nitrofigilis DSM 7299               | 1.70E-043 | Omp85 | YP_003655889.1 | outer membrane protein assembly complex, YaeT protein |
| Campylobacter concisus 13826                   | 7.20E-006 | BamD  | YP_001467200.1 | tRNA (guanine-N(1)-)-methyltransferase                |
| Campylobacter concisus 13826                   | 1.10E-063 | Omp85 | YP_001466370.1 | outer membrane protein assembly complex, YaeT protein |
| Campylobacter curvus 525.92                    | 1.80E-006 | BamD  | YP_001407991.1 | hypothetical protein CCV52592_1590                    |
| Campylobacter curvus 525.92                    | 2.50E-051 | Omp85 | YP_001408790.1 | outer membrane protein assembly complex, YaeT protein |
| Campylobacter fetus subsp. fetus 82-40         | 3.10E-006 | BamD  | YP_892222.1    | hypothetical protein CFF8240_1061                     |
| Campylobacter fetus subsp. fetus 82-40         | 3.50E-055 | Omp85 | YP_892635.1    | OMP85 family outer membrane protein                   |
| Campylobacter hominis ATCC BAA-381             | 3.80E-005 | BamB  | YP_001407163.1 | hypothetical protein CHAB381_1640                     |
| Campylobacter hominis ATCC BAA-381             | 2.40E-006 | BamD  | YP_001406138.1 | competence lipoprotein                                |
| Campylobacter hominis ATCC BAA-381             | 8.50E-005 | BamE  | YP_001406364.1 | Plp4                                                  |
| Campylobacter hominis ATCC BAA-381             | 2.60E-068 | Omp85 | YP_001407198.1 | outer membrane protein assembly complex, YaeT protein |
| Campylobacter jejuni RM1221                    | 2.30E-006 | BamD  | YP_179205.1    | lipoprotein                                           |
| Campylobacter jejuni RM1221                    | 2.80E-047 | Omp85 | YP_178148.1    | OMP85 family outer membrane protein                   |
| Campylobacter jejuni subsp. doylei 269.97      | 6.40E-006 | BamD  | YP_001397810.1 | putative lipoprotein                                  |
| Campylobacter jejuni subsp. doylei 269.97      | 4.60E-046 | Omp85 | YP_001397388.1 | OMP85 family outer membrane protein                   |
| Campylobacter jejuni subsp. jejuni 81-176      | 3.80E-006 | BamD  | YP_001000752.1 | putative lipoprotein                                  |
| Campylobacter jejuni subsp. jejuni 81-176      | 1.70E-047 | Omp85 | YP_999853.1    | OMP85 family outer membrane protein                   |
| Campylobacter jejuni subsp. jejuni 81116       | 4.00E-006 | BamD  | YP_001482591.1 | putative lipoprotein                                  |
| Campylobacter jejuni subsp. jejuni 81116       | 1.70E-047 | Omp85 | YP_001481698.1 | OMP85 family outer membrane protein                   |
| Campylobacter jejuni subsp. jejuni ICDCCJ07001 | 3.80E-006 | BamD  | YP_004066562.1 | putative lipoprotein                                  |
| Campylobacter jejuni subsp. jejuni ICDCCJ07001 | 9.90E-049 | Omp85 | YP_004065735.1 | outer membrane protein, OMP85 family                  |
| Campylobacter jejuni subsp. jejuni NCTC 11168  | 3.80E-006 | BamD  | YP_002344467.1 | putative lipoprotein                                  |
| Campylobacter jejuni subsp. jejuni NCTC 11168  | 1.00E-045 | Omp85 | YP_002343589.1 | outer membrane protein                                |
| Campylobacter lari RM2100                      | 5.50E-006 | BamD  | YP_002575535.1 | hypothetical protein Cla_0960                         |
| Campylobacter lari RM2100                      | 5.70E-005 | BamD  | YP_002575273.1 | amino acid ABC transporter substrate-binding protein  |
| Campylobacter lari RM2100                      | 2.60E-046 | Omp85 | YP_002574829.1 | outer membrane protein                                |
| Helicobacter acinonychis str. Sheeba           | 9.70E-008 | BamD  | YP_663921.1    | competence lipoprotein                                |
| Helicobacter acinonychis str. Sheeba           | 1.50E-022 | Omp85 | YP_664622.1    | protective surface antigen                            |
| Helicobacter bizzozeronii CIII-1               | 1.10E-015 | Omp85 | YP_004608529.1 | outer membrane protein assembly factor YaeT           |
| Helicobacter felis ATCC 49179                  | 1.40E-005 | BamD  | YP_004073790.1 | putative lipoprotein                                  |
| Helicobacter felis ATCC 49179                  | 2.80E-005 | BamD  | YP_004073509.1 | paralysed flagellum protein, PflA                     |
| Helicobacter felis ATCC 49179                  | 7.80E-026 | Omp85 | YP_004073252.1 | putative bacterial surface antigen                    |
| Helicobacter hepaticus ATCC 51449              | 7.30E-007 | BamD  | NP_860375.1    | hypothetical protein HH0844                           |
| Helicobacter hepaticus ATCC 51449              | 1.30E-057 | Omp85 | NP_860523.1    | outer membrane protein                                |

|                                     |           |       |                |                                                       |
|-------------------------------------|-----------|-------|----------------|-------------------------------------------------------|
| Helicobacter mustelae 12198         | 3.10E-006 | BamD  | YP_003516301.1 | lipoprotein                                           |
| Helicobacter mustelae 12198         | 2.50E-012 | Omp85 | YP_003516293.1 | bacterial surface antigen                             |
| Helicobacter pylori 26695           | 9.70E-007 | BamD  | NP_208169.1    | competence lipoprotein (comL)                         |
| Helicobacter pylori 26695           | 1.40E-022 | Omp85 | NP_207449.1    | protective surface antigen D15                        |
| Helicobacter pylori B38             | 9.70E-007 | BamD  | YP_003058023.1 | hypothetical protein HELPY_1365                       |
| Helicobacter pylori B38             | 2.40E-024 | Omp85 | YP_003057463.1 | surface antigen protein, signal peptide               |
| Helicobacter pylori B8              | 8.60E-007 | BamD  | YP_003729568.1 | hypothetical protein HPB8_1547                        |
| Helicobacter pylori B8              | 1.20E-010 | Omp85 | YP_003728879.1 | putative outer membrane protein                       |
| Helicobacter pylori G27             | 1.10E-006 | BamD  | YP_002266937.1 | competence lipoprotein                                |
| Helicobacter pylori G27             | 1.40E-016 | Omp85 | YP_002266243.1 | protective surface antigen D15                        |
| Helicobacter pylori HPAG1           | 9.70E-007 | BamD  | YP_628065.1    | competence lipoprotein                                |
| Helicobacter pylori HPAG1           | 1.70E-022 | Omp85 | YP_627381.1    | protective surface antigen D15                        |
| Helicobacter pylori J99             | 6.70E-007 | BamD  | NP_224010.1    | hypothetical protein jhp1292                          |
| Helicobacter pylori J99             | 1.40E-019 | Omp85 | NP_223318.1    | protective surface antigen D15                        |
| Helicobacter pylori P12             | 9.70E-007 | BamD  | YP_002302002.1 | competence lipoprotein ComL                           |
| Helicobacter pylori P12             | 1.90E-024 | Omp85 | YP_002301301.1 | protective surface antigen D15                        |
| Helicobacter pylori PeCan4          | 9.70E-007 | BamD  | YP_003927618.1 | hypothetical protein HPPC_06800                       |
| Helicobacter pylori PeCan4          | 2.00E-015 | Omp85 | YP_003926982.1 | protective surface antigen D15                        |
| Helicobacter pylori Shi470          | 9.70E-007 | BamD  | YP_001910855.1 | competence lipoprotein                                |
| Helicobacter pylori Shi470          | 2.60E-013 | Omp85 | YP_001910183.1 | protective surface antigen D15                        |
| Helicobacter pylori SJM180          | 5.60E-007 | BamD  | YP_003929293.1 | hypothetical protein HPSJM_07080                      |
| Helicobacter pylori SJM180          | 3.90E-011 | Omp85 | YP_003928576.1 | protective surface antigen D15                        |
| Nautilia profundicola AmH           | 5.80E-005 | BamB  | YP_002607035.1 | putative lipoprotein                                  |
| Nautilia profundicola AmH           | 9.50E-005 | BamD  | YP_002607234.1 | putative lipoprotein                                  |
| Nautilia profundicola AmH           | 2.10E-061 | Omp85 | YP_002607869.1 | outer membrane protein, OMP85 family                  |
| Nitratifactor salsuginis DSM 16511  | 2.40E-006 | BamB  | YP_004168995.1 | hypothetical protein Nitsa_2004                       |
| Nitratifactor salsuginis DSM 16511  | 4.10E-053 | Omp85 | YP_004167301.1 | outer membrane protein assembly complex, yaet protein |
| Nitratifactor salsuginis DSM 16511  | 1.30E-005 | Omp85 | YP_004168115.1 | surface antigen (d15)                                 |
| Nitratiruptor sp. SB155-2           | 7.20E-006 | BamD  | YP_001356814.1 | hypothetical protein NIS_1349                         |
| Nitratiruptor sp. SB155-2           | 7.40E-084 | Omp85 | YP_001355878.1 | hypothetical protein NIS_0407                         |
| Sulfuricurvum kujiense DSM 16994    | 1.20E-005 | BamD  | YP_004059171.1 | outer membrane assembly lipoprotein yfio              |
| Sulfuricurvum kujiense DSM 16994    | 3.10E-005 | BamD  | YP_004061375.1 | hypothetical protein Sulku_2516                       |
| Sulfuricurvum kujiense DSM 16994    | 2.10E-054 | Omp85 | YP_004059299.1 | outer membrane protein assembly complex, yaet protein |
| Sulfuricurvum kujiense DSM 16994    | 1.40E-005 | Omp85 | YP_004058887.1 | surface antigen (d15)                                 |
| Sulfurimonas autotrophica DSM 16294 | 5.80E-005 | BamD  | YP_003892853.1 | DNA uptake lipoprotein                                |
| Sulfurimonas autotrophica DSM 16294 | 1.60E-042 | Omp85 | YP_003891747.1 | outer membrane protein assembly complex, YaeT protein |
| Sulfurimonas denitrificans DSM 1251 | 4.00E-005 | BamE  | YP_393909.1    | OmpA/MotB                                             |
| Sulfurimonas denitrificans DSM 1251 | 9.20E-041 | Omp85 | YP_393174.1    | surface antigen (D15)                                 |

## epsilon\_e-5

|                                      |           |       |                |                                                       |
|--------------------------------------|-----------|-------|----------------|-------------------------------------------------------|
| Sulfurospirillum deleyianum DSM 6946 | 8.60E-007 | BamD  | YP_003303925.1 | outer membrane assembly lipoprotein YfiO              |
| Sulfurospirillum deleyianum DSM 6946 | 2.70E-005 | BamE  | YP_003305315.1 | hypothetical protein SdeI_2268                        |
| Sulfurospirillum deleyianum DSM 6946 | 9.90E-060 | Omp85 | YP_003303304.1 | outer membrane protein assembly complex, YaeT protein |
| Sulfurovum sp. NBC37-1               | 3.20E-005 | BamB  | YP_001357737.1 | hypothetical protein SUN_0420                         |
| Sulfurovum sp. NBC37-1               | 2.50E-006 | BamD  | YP_001359211.1 | hypothetical protein SUN_1907                         |
| Sulfurovum sp. NBC37-1               | 2.40E-059 | Omp85 | YP_001359297.1 | hypothetical protein SUN_1997                         |
| Sulfurovum sp. NBC37-1               | 2.40E-005 | Omp85 | YP_001358883.1 | hypothetical protein SUN_1576                         |

## gamma\_e-5

|                                           |           |       |                |                                                                                           |
|-------------------------------------------|-----------|-------|----------------|-------------------------------------------------------------------------------------------|
| Acidithiobacillus caldus SM-1             | 5.30E-046 | BamB  | YP_004748721.1 | pyrrolo-quinoline quinone                                                                 |
| Acidithiobacillus caldus SM-1             | 2.50E-008 | BamB  | YP_004748944.1 | tetrathionate hydrolase TetH                                                              |
| Acidithiobacillus caldus SM-1             | 9.30E-007 | BamB  | YP_004748254.1 | hypothetical protein Atc_0905                                                             |
| Acidithiobacillus caldus SM-1             | 3.00E-060 | BamD  | YP_004749784.1 | component of the lipoprotein assembly complex (forms a complex with YaeT, YfgL, and NlpB) |
| Acidithiobacillus caldus SM-1             | 9.70E-035 | BamD  | YP_004750039.1 | component of the lipoprotein assembly complex (forms a complex with YaeT, YfgL, and NlpB) |
| Acidithiobacillus caldus SM-1             | 5.60E-017 | BamE  | YP_004749937.1 | outer membrane lipoprotein SmpA                                                           |
| Acidithiobacillus caldus SM-1             | 6.20E-186 | Omp85 | YP_004748198.1 | outer membrane protein assembly factor YaeT                                               |
| Acidithiobacillus caldus SM-1             | 5.20E-006 | Omp85 | YP_004748650.1 | surface antigen (D15)                                                                     |
| Acidithiobacillus ferrivorans SS3         | 3.40E-060 | BamB  | YP_004783986.1 | outer membrane assembly lipoprotein YfgL                                                  |
| Acidithiobacillus ferrivorans SS3         | 2.00E-008 | BamB  | YP_004782606.1 | pyrrolo-quinoline quinone repeat-containing protein                                       |
| Acidithiobacillus ferrivorans SS3         | 4.10E-008 | BamB  | YP_004785010.1 | pyrrolo-quinoline quinone repeat-containing protein                                       |
| Acidithiobacillus ferrivorans SS3         | 7.70E-064 | BamD  | YP_004783161.1 | outer membrane assembly lipoprotein YfiO                                                  |
| Acidithiobacillus ferrivorans SS3         | 1.80E-005 | BamD  | YP_004782697.1 | tol-pal system protein YbgF                                                               |
| Acidithiobacillus ferrivorans SS3         | 3.80E-015 | BamE  | YP_004785153.1 | SmpA/OmlA domain-containing protein                                                       |
| Acidithiobacillus ferrivorans SS3         | 2.20E-172 | Omp85 | YP_004783785.1 | outer membrane protein assembly complex, YaeT protein                                     |
| Acidithiobacillus ferrivorans SS3         | 1.10E-005 | Omp85 | YP_004784199.1 | surface antigen (D15)                                                                     |
| Acidithiobacillus ferrooxidans ATCC 23270 | 2.70E-052 | BamB  | YP_002426345.1 | PQQ enzyme repeat domain protein                                                          |
| Acidithiobacillus ferrooxidans ATCC 23270 | 1.30E-009 | BamB  | YP_002426649.1 | PQQ enzyme repeat domain protein                                                          |
| Acidithiobacillus ferrooxidans ATCC 23270 | 5.00E-007 | BamB  | YP_002424542.1 | tetrathionate hydrolase                                                                   |
| Acidithiobacillus ferrooxidans ATCC 23270 | 9.90E-007 | BamB  | YP_002426388.1 | PQQ enzyme repeat protein                                                                 |
| Acidithiobacillus ferrooxidans ATCC 23270 | 1.90E-055 | BamD  | YP_002424926.1 | competence lipoprotein ComL, putative                                                     |
| Acidithiobacillus ferrooxidans ATCC 23270 | 9.80E-006 | BamD  | YP_002424584.1 | hypothetical protein AFE_0070                                                             |
| Acidithiobacillus ferrooxidans ATCC 23270 | 4.20E-019 | BamE  | YP_002424787.1 | lipoprotein, SmpA/OmlA family                                                             |
| Acidithiobacillus ferrooxidans ATCC 23270 | 5.20E-175 | Omp85 | YP_002425880.1 | outer membrane protein, OMP85 family                                                      |
| Acidithiobacillus ferrooxidans ATCC 23270 | 2.00E-005 | Omp85 | YP_002426365.1 | outer membrane protein, OMP85 family                                                      |
| Acinetobacter baumannii AB0057            | 2.00E-056 | BamB  | YP_002318011.1 | outer membrane assembly lipoprotein YfgL                                                  |
| Acinetobacter baumannii AB0057            | 2.00E-069 | BamD  | YP_002318281.1 | putative competence protein                                                               |
| Acinetobacter baumannii AB0057            | 1.90E-017 | BamE  | YP_002318333.1 | outer membrane lipoprotein                                                                |
| Acinetobacter baumannii AB0057            | 3.00E-160 | Omp85 | YP_002319666.1 | outer membrane protein assembly complex                                                   |
| Acinetobacter baumannii AB0057            | 2.30E-007 | Omp85 | YP_002319812.1 | hypothetical protein AB57_2465                                                            |
| Acinetobacter baumannii AB307-0294        | 2.00E-056 | BamB  | YP_002326916.1 | outer membrane assembly lipoprotein YfgL                                                  |
| Acinetobacter baumannii AB307-0294        | 2.00E-069 | BamD  | YP_002326669.1 | Competence lipoprotein comL precursor                                                     |
| Acinetobacter baumannii AB307-0294        | 1.90E-017 | BamE  | YP_002326618.1 | outer membrane lipoprotein omlA precursor                                                 |
| Acinetobacter baumannii AB307-0294        | 3.00E-160 | Omp85 | YP_002325380.1 | outer membrane protein assembly complex, YaeT protein                                     |
| Acinetobacter baumannii AB307-0294        | 2.30E-007 | Omp85 | YP_002325237.1 | Surface antigen family protein                                                            |
| Acinetobacter baumannii ACICU             | 2.00E-015 | BamB  | YP_001845174.1 | WD-40 repeat-containing protein                                                           |
| Acinetobacter baumannii ACICU             | 4.30E-005 | BamB  | YP_001845347.1 | glucose dehydrogenase                                                                     |



## gamma\_e-5

|                                                     |           |       |                |                                                                                                              |
|-----------------------------------------------------|-----------|-------|----------------|--------------------------------------------------------------------------------------------------------------|
| Acinetobacter baumannii ACICU                       | 2.00E-069 | BamD  | YP_001845452.1 | DNA uptake lipoprotein                                                                                       |
| Acinetobacter baumannii ACICU                       | 1.90E-017 | BamE  | YP_001845504.1 | small protein A                                                                                              |
| Acinetobacter baumannii ACICU                       | 9.80E-005 | BamE  | YP_001845653.1 | small protein A                                                                                              |
| Acinetobacter baumannii ACICU                       | 3.00E-160 | Omp85 | YP_001846751.1 | outer membrane protein/protective antigen OMA87                                                              |
| Acinetobacter baumannii ACICU                       | 2.20E-007 | Omp85 | YP_001846991.1 | outer membrane protein                                                                                       |
| Acinetobacter baumannii ATCC 17978                  | 2.00E-030 | BamB  | YP_001083560.1 | hypothetical protein A1S_0505                                                                                |
| Acinetobacter baumannii ATCC 17978                  | 6.00E-059 | BamD  | YP_001083876.1 | putative competence protein (ComL)                                                                           |
| Acinetobacter baumannii ATCC 17978                  | 5.60E-163 | Omp85 | YP_001084998.1 | putative outer membrane protein                                                                              |
| Acinetobacter baumannii ATCC 17978                  | 2.20E-007 | Omp85 | YP_001085161.1 | putative outer membrane protein                                                                              |
| Acinetobacter baumannii AYE                         | 2.00E-056 | BamB  | YP_001715033.1 | hypothetical protein ABAYE3260                                                                               |
| Acinetobacter baumannii AYE                         | 2.00E-069 | BamD  | YP_001714768.1 | competence protein (ComL)                                                                                    |
| Acinetobacter baumannii AYE                         | 1.90E-017 | BamE  | YP_001714718.1 | outer membrane lipoprotein                                                                                   |
| Acinetobacter baumannii AYE                         | 1.70E-164 | Omp85 | YP_001713480.1 | outer membrane protein                                                                                       |
| Acinetobacter baumannii AYE                         | 2.30E-007 | Omp85 | YP_001713338.1 | hypothetical protein ABAYE1429                                                                               |
| Acinetobacter baumannii SDF                         | 1.70E-054 | BamB  | YP_001708138.1 | hypothetical protein ABSDF2997                                                                               |
| Acinetobacter baumannii SDF                         | 2.00E-069 | BamD  | YP_001707834.1 | competence protein (ComL)                                                                                    |
| Acinetobacter baumannii SDF                         | 1.90E-017 | BamE  | YP_001707766.1 | outer membrane lipoprotein                                                                                   |
| Acinetobacter baumannii SDF                         | 3.00E-165 | Omp85 | YP_001707071.1 | outer membrane protein                                                                                       |
| Acinetobacter baumannii SDF                         | 2.20E-007 | Omp85 | YP_001707007.1 | hypothetical protein ABSDF1607                                                                               |
| Acinetobacter sp. ADP1                              | 1.70E-050 | BamB  | YP_045310.1    | PQQ repeat-containing protein                                                                                |
| Acinetobacter sp. ADP1                              | 2.50E-005 | BamB  | YP_046380.1    | quininate/shikimate dehydrogenase, pyrroloquinoline-quinone]<br>(NAD(P)-independent quininate dehydrogenase) |
| Acinetobacter sp. ADP1                              | 6.80E-005 | BamB  | YP_047514.1    | glucose dehydrogenase                                                                                        |
| Acinetobacter sp. ADP1                              | 4.60E-067 | BamD  | YP_047442.1    | competence protein (ComL)                                                                                    |
| Acinetobacter sp. ADP1                              | 5.70E-019 | BamE  | YP_045627.1    | outer membrane lipoprotein                                                                                   |
| Acinetobacter sp. ADP1                              | 8.40E-006 | BamE  | YP_046308.1    | antigen                                                                                                      |
| Acinetobacter sp. ADP1                              | 3.70E-164 | Omp85 | YP_046066.1    | outer membrane protein                                                                                       |
| Acinetobacter sp. ADP1                              | 1.10E-007 | Omp85 | YP_047000.1    | outer membrane protein                                                                                       |
| Acinetobacter sp. DR1                               | 2.00E-054 | BamB  | YP_003733640.1 | outer membrane assembly lipoprotein YfgL                                                                     |
| Acinetobacter sp. DR1                               | 4.90E-071 | BamD  | YP_003733358.1 | DNA uptake lipoprotein                                                                                       |
| Acinetobacter sp. DR1                               | 1.70E-017 | BamE  | YP_003733308.1 | Outer membrane lipoprotein omlA precursor                                                                    |
| Acinetobacter sp. DR1                               | 9.40E-166 | Omp85 | YP_003731732.1 | putative outer membrane protein                                                                              |
| Acinetobacter sp. DR1                               | 2.60E-007 | Omp85 | YP_003731564.1 | Surface antigen family protein                                                                               |
| Actinobacillus pleuropneumoniae serovar 3 str. JL03 | 6.00E-131 | BamD  | YP_001652140.1 | putative lipoprotein                                                                                         |
| Actinobacillus pleuropneumoniae serovar 3 str. JL03 | 8.90E-068 | BamE  | YP_001651480.1 | small protein A                                                                                              |
| Actinobacillus pleuropneumoniae serovar 3 str. JL03 | 2.90E-181 | Omp85 | YP_001651464.1 | outer membrane protein D-15                                                                                  |
| Actinobacillus pleuropneumoniae serovar 3 str. JL03 | 3.60E-006 | Omp85 | YP_001651839.1 | putative outer membrane protein                                                                              |
| Actinobacillus pleuropneumoniae serovar 5b str. L20 | 6.00E-131 | BamD  | YP_001053816.1 | putative lipoprotein                                                                                         |

## gamma\_e-5

|                                                     |           |       |                |                                          |
|-----------------------------------------------------|-----------|-------|----------------|------------------------------------------|
| Actinobacillus pleuropneumoniae serovar 5b str. L20 | 8.90E-068 | BamE  | YP_001053137.1 | small protein A                          |
| Actinobacillus pleuropneumoniae serovar 5b str. L20 | 1.70E-183 | Omp85 | YP_001053120.1 | protective surface antigen D15 precursor |
| Actinobacillus pleuropneumoniae serovar 5b str. L20 | 3.60E-006 | Omp85 | YP_001053530.1 | hypothetical protein APL_0829            |
| Actinobacillus pleuropneumoniae serovar 7 str. AP76 | 1.50E-130 | BamD  | YP_001968973.1 | lipoprotein                              |
| Actinobacillus pleuropneumoniae serovar 7 str. AP76 | 8.90E-068 | BamE  | YP_001968246.1 | small protein A                          |
| Actinobacillus pleuropneumoniae serovar 7 str. AP76 | 5.30E-184 | Omp85 | YP_001968229.1 | protective surface antigen D15 precursor |
| Actinobacillus pleuropneumoniae serovar 7 str. AP76 | 3.60E-006 | Omp85 | YP_001968680.1 | hypothetical protein APP7_0886           |
| Actinobacillus succinogenes 130Z                    | 2.50E-015 | BamC  | YP_001343335.1 | NlpB/DapX family lipoprotein             |
| Actinobacillus succinogenes 130Z                    | 3.00E-137 | BamD  | YP_001343353.1 | TPR repeat-containing protein            |
| Actinobacillus succinogenes 130Z                    | 1.70E-053 | BamE  | YP_001344085.1 | SmpA/OmlA domain-containing protein      |
| Actinobacillus succinogenes 130Z                    | 1.10E-186 | Omp85 | YP_001345246.1 | surface antigen (D15)                    |
| Actinobacillus succinogenes 130Z                    | 5.50E-007 | Omp85 | YP_001343676.1 | surface antigen (D15)                    |
| Aeromonas hydrophila subsp. hydrophila ATCC 7966    | 7.40E-165 | BamB  | YP_856298.1    | PQQ repeat-containing protein            |
| Aeromonas hydrophila subsp. hydrophila ATCC 7966    | 4.90E-041 | BamC  | YP_855440.1    | NlpB/DapX lipoprotein                    |
| Aeromonas hydrophila subsp. hydrophila ATCC 7966    | 1.90E-141 | BamD  | YP_858499.1    | ComL family lipoprotein                  |
| Aeromonas hydrophila subsp. hydrophila ATCC 7966    | 2.40E-040 | BamE  | YP_855985.1    | outer membrane lipoprotein OmlA          |
| Aeromonas hydrophila subsp. hydrophila ATCC 7966    | 3.70E-005 | BamE  | YP_858403.1    | hypothetical protein AHA_3969            |
| Aeromonas hydrophila subsp. hydrophila ATCC 7966    | 8.80E-005 | BamE  | YP_855839.1    | hypothetical protein AHA_1297            |
| Aeromonas hydrophila subsp. hydrophila ATCC 7966    | 1.90E-237 | Omp85 | YP_855722.1    | OMP85 family outer membrane protein      |
| Aeromonas hydrophila subsp. hydrophila ATCC 7966    | 1.70E-007 | Omp85 | YP_856091.1    | OMP85 family outer membrane protein      |
| Aeromonas salmonicida subsp. salmonicida A449       | 4.40E-164 | BamB  | YP_001142369.1 | WD40 domain-containing protein           |
| Aeromonas salmonicida subsp. salmonicida A449       | 1.80E-044 | BamC  | YP_001143118.1 | lipoprotein-34 NlpB                      |
| Aeromonas salmonicida subsp. salmonicida A449       | 1.80E-141 | BamD  | YP_001140182.1 | ComL family lipoprotein                  |
| Aeromonas salmonicida subsp. salmonicida A449       | 2.40E-041 | BamE  | YP_001142673.1 | small protein A                          |
| Aeromonas salmonicida subsp. salmonicida A449       | 7.30E-006 | BamE  | YP_001143707.1 | hypothetical protein ASA_4011            |
| Aeromonas salmonicida subsp. salmonicida A449       | 2.10E-238 | Omp85 | YP_001142894.1 | surface antigen                          |
| Aeromonas salmonicida subsp. salmonicida A449       | 2.50E-007 | Omp85 | YP_001142567.1 | outer membrane protein                   |
| Aeromonas veronii B565                              | 9.50E-164 | BamB  | YP_004393017.1 | WD40 domain-containing protein           |
| Aeromonas veronii B565                              | 1.20E-019 | BamC  | YP_004393993.1 | lipoprotein-34 NlpB                      |
| Aeromonas veronii B565                              | 1.20E-141 | BamD  | YP_004394421.1 | ComL family lipoprotein                  |
| Aeromonas veronii B565                              | 7.80E-048 | BamE  | YP_004393390.1 | Small protein A                          |
| Aeromonas veronii B565                              | 3.40E-005 | BamE  | YP_004390866.1 | hypothetical protein B565_0214           |
| Aeromonas veronii B565                              | 1.00E-235 | Omp85 | YP_004393699.1 | Surface antigen                          |
| Aeromonas veronii B565                              | 4.50E-007 | Omp85 | YP_004393298.1 | outer membrane protein, OMP85 family     |
| Aggregatibacter aphrophilus NJ8700                  | 1.00E-018 | BamC  | YP_003006672.1 | NlpB protein                             |
| Aggregatibacter aphrophilus NJ8700                  | 1.00E-152 | BamD  | YP_003008669.1 | lipoprotein                              |
| Aggregatibacter aphrophilus NJ8700                  | 4.40E-051 | BamE  | YP_003008210.1 | SmpA protein                             |
| Aggregatibacter aphrophilus NJ8700                  | 2.30E-005 | BamE  | YP_003007200.1 | Plp4                                     |

## gamma\_e-5

|                                           |           |       |                |                                                       |
|-------------------------------------------|-----------|-------|----------------|-------------------------------------------------------|
| Aggregatibacter aphrophilus NJ8700        | 4.70E-175 | Omp85 | YP_003007977.1 | outer membrane protein assembly complex, YaeT protein |
| Aggregatibacter aphrophilus NJ8700        | 7.80E-007 | Omp85 | YP_003008027.1 | outer membrane protein                                |
| Alcanivorax borkumensis SK2               | 3.20E-114 | BamB  | YP_693577.1    | hypothetical protein ABO_1857                         |
| Alcanivorax borkumensis SK2               | 2.70E-094 | BamD  | YP_692195.1    | competence lipoprotein ComL                           |
| Alcanivorax borkumensis SK2               | 9.60E-023 | BamE  | YP_692028.1    | outer membrane lipoprotein OmlA                       |
| Alcanivorax borkumensis SK2               | 7.30E-208 | Omp85 | YP_692871.1    | outer membrane protein surface antigen family protein |
| Alcanivorax borkumensis SK2               | 2.00E-007 | Omp85 | YP_692462.1    | hypothetical protein ABO_0742                         |
| Aliivibrio salmonicida LFI1238            | 1.00E-157 | BamB  | YP_002262249.1 | outer membrane protein assembly complex subunit YfgL  |
| Aliivibrio salmonicida LFI1238            | 5.90E-168 | BamC  | YP_002263733.1 | lipoprotein                                           |
| Aliivibrio salmonicida LFI1238            | 7.60E-147 | BamD  | YP_002262181.1 | outer membrane protein                                |
| Aliivibrio salmonicida LFI1238            | 3.30E-052 | BamE  | YP_002263826.1 | lipoprotein, small protein A                          |
| Aliivibrio salmonicida LFI1238            | 5.80E-233 | Omp85 | YP_002263773.1 | outer membrane protein assembly factor YaeT           |
| Aliivibrio salmonicida LFI1238            | 2.20E-006 | Omp85 | YP_002261962.1 | surface antigen protein                               |
| Alkalilimnicola ehrlichii MLHE-1          | 7.90E-101 | BamB  | YP_742093.1    | Pyrrolo-quinoline quinone                             |
| Alkalilimnicola ehrlichii MLHE-1          | 1.40E-007 | BamB  | YP_743559.1    | Pyrrolo-quinoline quinone                             |
| Alkalilimnicola ehrlichii MLHE-1          | 3.40E-007 | BamC  | YP_743305.1    | NlpBDapX lipoprotein                                  |
| Alkalilimnicola ehrlichii MLHE-1          | 1.00E-106 | BamD  | YP_743381.1    | putative lipoprotein                                  |
| Alkalilimnicola ehrlichii MLHE-1          | 9.90E-015 | BamD  | YP_743233.1    | DNA uptake lipoprotein-like protein                   |
| Alkalilimnicola ehrlichii MLHE-1          | 4.40E-022 | BamE  | YP_742740.1    | SmpA/OmlA domain-containing protein                   |
| Alkalilimnicola ehrlichii MLHE-1          | 4.60E-199 | Omp85 | YP_742689.1    | surface antigen (D15)                                 |
| Alkalilimnicola ehrlichii MLHE-1          | 4.00E-008 | Omp85 | YP_741377.1    | surface antigen (D15)                                 |
| Allochromatium vinosum DSM 180            | 2.40E-118 | BamB  | YP_003443245.1 | outer membrane assembly lipoprotein YfgL              |
| Allochromatium vinosum DSM 180            | 2.40E-005 | BamC  | YP_003444357.1 | putative lipoprotein                                  |
| Allochromatium vinosum DSM 180            | 2.10E-109 | BamD  | YP_003442773.1 | outer membrane assembly lipoprotein YfiO              |
| Allochromatium vinosum DSM 180            | 8.20E-005 | BamD  | YP_003442932.1 | tol-pal system protein YbgF                           |
| Allochromatium vinosum DSM 180            | 4.30E-024 | BamE  | YP_003444194.1 | SmpA/OmlA domain-containing protein                   |
| Allochromatium vinosum DSM 180            | 5.70E-207 | Omp85 | YP_003444006.1 | outer membrane protein assembly complex, YaeT protein |
| Allochromatium vinosum DSM 180            | 2.40E-006 | Omp85 | YP_003443296.1 | surface antigen                                       |
| Alteromonas macleodii str. 'Deep ecotype' | 1.10E-123 | BamB  | YP_004427699.1 | outer membrane biogenesis protein BamB                |
| Alteromonas macleodii str. 'Deep ecotype' | 2.10E-122 | BamB  | YP_004426190.1 | outer membrane biogenesis protein BamB                |
| Alteromonas macleodii str. 'Deep ecotype' | 1.20E-083 | BamC  | YP_004427299.1 | lipoprotein-34 NlpB                                   |
| Alteromonas macleodii str. 'Deep ecotype' | 7.10E-131 | BamD  | YP_004427604.1 | Competence lipoprotein ComL                           |
| Alteromonas macleodii str. 'Deep ecotype' | 6.10E-040 | BamE  | YP_004426535.1 | SmpA/OmlA protein                                     |
| Alteromonas macleodii str. 'Deep ecotype' | 9.30E-005 | BamE  | YP_004426729.1 | hypothetical protein MADE_1007955                     |
| Alteromonas macleodii str. 'Deep ecotype' | 4.50E-185 | Omp85 | YP_004426216.1 | outer membrane protein, OMP85 family                  |
| Alteromonas macleodii str. 'Deep ecotype' | 2.60E-007 | Omp85 | YP_004427398.1 | surface antigen D15                                   |
| Alteromonas macleodii str. 'Deep ecotype' | 2.90E-007 | Omp85 | YP_004429152.1 | surface antigen D15                                   |
| Alteromonas sp. SN2                       | 1.30E-108 | BamB  | YP_004466149.1 | outer membrane biogenesis protein BamB                |

## gamma\_e-5

|                                                           |           |       |                |                                                      |
|-----------------------------------------------------------|-----------|-------|----------------|------------------------------------------------------|
| Alteromonas sp. SN2                                       | 1.80E-008 | BamB  | YP_004465597.1 | methanol/ethanol family PQQ-dependent dehydrogenase  |
| Alteromonas sp. SN2                                       | 1.50E-074 | BamC  | YP_004467096.1 | lipoprotein-34 NlpB                                  |
| Alteromonas sp. SN2                                       | 2.70E-130 | BamD  | YP_004466243.1 | Competence lipoprotein ComL                          |
| Alteromonas sp. SN2                                       | 1.60E-039 | BamE  | YP_004467638.1 | SmpA/OmlA protein                                    |
| Alteromonas sp. SN2                                       | 1.50E-185 | Omp85 | YP_004468053.1 | OMP85 family outer membrane protein                  |
| Alteromonas sp. SN2                                       | 1.20E-006 | Omp85 | YP_004469654.1 | surface antigen D15                                  |
| Azotobacter vinelandii DJ                                 | 1.20E-168 | BamB  | YP_002801137.1 | YfgL-like phosphoquinolipoprotein kinase             |
| Azotobacter vinelandii DJ                                 | 2.50E-167 | BamD  | YP_002798396.1 | competence protein ComL                              |
| Azotobacter vinelandii DJ                                 | 9.60E-005 | BamD  | YP_002800784.1 | tol-pal system YbgF-like protein                     |
| Azotobacter vinelandii DJ                                 | 4.40E-025 | BamE  | YP_002801398.1 | outer membrane lipoprotein OmlA                      |
| Azotobacter vinelandii DJ                                 | 3.40E-194 | Omp85 | YP_002801006.1 | surface antigen                                      |
| Azotobacter vinelandii DJ                                 | 5.10E-006 | Omp85 | YP_002800032.1 | outer membrane surface antigen (D15)                 |
| Baumannia cicadellinicola str. Hc (Homalodisca coagulata) | 2.90E-114 | BamB  | YP_588489.2    | outer membrane protein assembly complex subunit YfgL |
| Baumannia cicadellinicola str. Hc (Homalodisca coagulata) | 1.00E-073 | BamD  | YP_588649.1    | hypothetical protein BCI_0192                        |
| Baumannia cicadellinicola str. Hc (Homalodisca coagulata) | 8.20E-059 | BamE  | YP_588995.1    | small protein A                                      |
| Baumannia cicadellinicola str. Hc (Homalodisca coagulata) | 5.50E-118 | Omp85 | YP_588965.1    | OMP85 family outer membrane protein                  |
| Baumannia cicadellinicola str. Hc (Homalodisca coagulata) | 5.90E-005 | Omp85 | YP_589033.1    | OMP85 family outer membrane protein                  |
| Buchnera aphidicola (Cinara tujaefilina)                  | 1.30E-008 | Omp85 | YP_004589997.1 | outer membrane protein                               |
| Buchnera aphidicola str. 5A (Acyrthosiphon pisum)         | 2.30E-035 | BamD  | YP_002468144.1 | hypothetical 27.8 kDa lipoprotein                    |
| Buchnera aphidicola str. 5A (Acyrthosiphon pisum)         | 4.30E-007 | BamE  | YP_002467944.1 | small protein A                                      |
| Buchnera aphidicola str. 5A (Acyrthosiphon pisum)         | 6.50E-089 | Omp85 | YP_002467993.1 | YaeT                                                 |
| Buchnera aphidicola str. APS (Acyrthosiphon pisum)        | 2.30E-035 | BamD  | NP_240219.1    | hypothetical protein BU402                           |
| Buchnera aphidicola str. APS (Acyrthosiphon pisum)        | 3.90E-007 | BamE  | NP_240017.1    | small protein A                                      |
| Buchnera aphidicola str. APS (Acyrthosiphon pisum)        | 2.20E-009 | Omp85 | NP_240066.1    | hypothetical protein BU237                           |
| Buchnera aphidicola str. Sg (Schizaphis graminum)         | 6.60E-028 | BamD  | NP_660730.1    | hypothetical protein BUsg389                         |
| Buchnera aphidicola str. Sg (Schizaphis graminum)         | 1.40E-007 | BamE  | NP_660534.1    | small protein A                                      |
| Buchnera aphidicola str. Sg (Schizaphis graminum)         | 7.40E-098 | Omp85 | NP_660579.1    | hypothetical protein BUsg231                         |
| Buchnera aphidicola str. Tuc7 (Acyrthosiphon pisum)       | 2.30E-035 | BamD  | YP_002468697.1 | hypothetical 27.8 kDa lipoprotein                    |
| Buchnera aphidicola str. Tuc7 (Acyrthosiphon pisum)       | 3.90E-007 | BamE  | YP_002468500.1 | small membrane protein A                             |
| Buchnera aphidicola str. Tuc7 (Acyrthosiphon pisum)       | 1.00E-089 | Omp85 | YP_002468548.1 | YaeT                                                 |
| Candidatus Blochmannia floridanus                         | 1.00E-146 | BamD  | NP_878483.1    | putative lipoprotein                                 |
| Candidatus Blochmannia floridanus                         | 8.10E-011 | BamE  | NP_878825.1    | small membrane protein A                             |
| Candidatus Blochmannia floridanus                         | 1.50E-125 | Omp85 | NP_878576.1    | outer membrane protein precursor                     |
| Candidatus Blochmannia pennsylvanicus str. BPEN           | 4.50E-090 | BamD  | YP_277697.1    | putative lipoprotein                                 |
| Candidatus Blochmannia pennsylvanicus str. BPEN           | 3.30E-014 | BamE  | YP_278053.1    | small membrane protein A                             |
| Candidatus Blochmannia pennsylvanicus str. BPEN           | 6.20E-136 | Omp85 | YP_277791.1    | outer membrane protein precursor                     |
| Candidatus Blochmannia pennsylvanicus str. BPEN           | 2.50E-005 | Omp85 | YP_277607.1    | putative outer membrane protein                      |
| Candidatus Blochmannia vafer str. BVAF                    | 5.70E-092 | BamD  | YP_004124260.1 | lipoprotein                                          |

## gamma\_e-5

|                                                              |           |       |                |                                                               |
|--------------------------------------------------------------|-----------|-------|----------------|---------------------------------------------------------------|
| Candidatus Blochmannia vafer str. BVAf                       | 1.00E-010 | BamE  | YP_004124604.1 | Small protein A                                               |
| Candidatus Blochmannia vafer str. BVAf                       | 1.80E-107 | Omp85 | YP_004124354.1 | outer membrane protein assembly factor YaeT                   |
| Candidatus Hamiltonella defensa 5AT (Acyrtosiphon pisum)     | 1.30E-149 | BamB  | YP_002923632.1 | outer membrane protein assembly complex subunit YfgL          |
| Candidatus Hamiltonella defensa 5AT (Acyrtosiphon pisum)     | 4.20E-114 | BamC  | YP_002924581.1 | lipoprotein                                                   |
| Candidatus Hamiltonella defensa 5AT (Acyrtosiphon pisum)     | 3.10E-136 | BamD  | YP_002923450.1 | outer membrane protein assembly complex subunit YfiO          |
| Candidatus Hamiltonella defensa 5AT (Acyrtosiphon pisum)     | 8.20E-043 | BamE  | YP_002923698.1 | hypothetical protein HDEF_0829                                |
| Candidatus Hamiltonella defensa 5AT (Acyrtosiphon pisum)     | 1.40E-243 | Omp85 | YP_002923482.1 | outer membrane protein assembly factor YaeT                   |
| Candidatus Hamiltonella defensa 5AT (Acyrtosiphon pisum)     | 9.70E-006 | Omp85 | YP_002923648.1 | outer membrane protein                                        |
| Candidatus Moranella endobia PCIT                            | 1.20E-133 | BamB  | YP_004706704.1 | outer membrane protein assembly complex subunit YfgL          |
| Candidatus Moranella endobia PCIT                            | 3.80E-060 | BamD  | YP_004706688.1 | putative outer membrane protein assembly complex subunit YfiO |
| Candidatus Moranella endobia PCIT                            | 1.40E-217 | Omp85 | YP_004706833.1 | outer membrane protein assembly factor YaeT                   |
| Candidatus Riesia pediculicola USDA                          | 1.40E-047 | Omp85 | YP_003603211.1 | outer membrane protein assembly factor YaeT, putative         |
| Candidatus Ruthia magnifica str. Cm (Calyptogenia magnifica) | 1.70E-046 | BamD  | YP_903737.1    | putative transmembrane protein                                |
| Candidatus Ruthia magnifica str. Cm (Calyptogenia magnifica) | 6.00E-015 | BamE  | YP_903933.1    | SmpA/OmlA domain-containing protein                           |
| Candidatus Ruthia magnifica str. Cm (Calyptogenia magnifica) | 1.60E-120 | Omp85 | YP_903776.1    | surface antigen (D15)                                         |
| Candidatus Vesicomysocius okutanii HA                        | 7.10E-059 | BamD  | YP_001219313.1 | competence lipoprotein ComL                                   |
| Candidatus Vesicomysocius okutanii HA                        | 5.60E-016 | BamE  | YP_001219515.1 | hypothetical protein COSY_0679                                |
| Candidatus Vesicomysocius okutanii HA                        | 9.90E-121 | Omp85 | YP_001219350.1 | surface antigen family protein                                |
| Cellvibrio japonicus Ueda107                                 | 1.20E-121 | BamB  | YP_001981971.1 | PQQ enzyme repeat domain-containing protein                   |
| Cellvibrio japonicus Ueda107                                 | 4.40E-011 | BamB  | YP_001982739.1 | serine/threonine protein kinase                               |
| Cellvibrio japonicus Ueda107                                 | 6.50E-108 | BamD  | YP_001983660.1 | competence protein ComL                                       |
| Cellvibrio japonicus Ueda107                                 | 1.40E-015 | BamE  | YP_001983807.1 | outer membrane lipoprotein omlA                               |
| Cellvibrio japonicus Ueda107                                 | 6.10E-005 | BamE  | YP_001982829.1 | putative lipoprotein                                          |
| Cellvibrio japonicus Ueda107                                 | 2.70E-164 | Omp85 | YP_001981616.1 | outer membrane protein                                        |
| Cellvibrio japonicus Ueda107                                 | 2.30E-006 | Omp85 | YP_001983825.1 | outer membrane protein, OMP85 family                          |
| Chromohalobacter salexigens DSM 3043                         | 2.10E-109 | BamB  | YP_574902.1    | Pyrrolo-quinoline quinone                                     |
| Chromohalobacter salexigens DSM 3043                         | 8.20E-005 | BamB  | YP_572233.1    | quinoprotein glucose dehydrogenase                            |
| Chromohalobacter salexigens DSM 3043                         | 1.40E-106 | BamD  | YP_572557.1    | competence lipoprotein ComL                                   |
| Chromohalobacter salexigens DSM 3043                         | 1.90E-031 | BamE  | YP_575141.1    | SmpA/OmlA                                                     |
| Chromohalobacter salexigens DSM 3043                         | 3.00E-207 | Omp85 | YP_572632.1    | surface antigen (D15)                                         |
| Chromohalobacter salexigens DSM 3043                         | 4.00E-007 | Omp85 | YP_573914.1    | surface antigen (D15)                                         |
| Citrobacter koseri ATCC BAA-895                              | 2.30E-217 | BamB  | YP_001451873.1 | outer membrane protein assembly complex subunit YfgL          |
| Citrobacter koseri ATCC BAA-895                              | 2.20E-005 | BamB  | YP_001454151.1 | hypothetical protein CKO_02606                                |
| Citrobacter koseri ATCC BAA-895                              | 6.20E-228 | BamC  | YP_001451909.1 | lipoprotein                                                   |
| Citrobacter koseri ATCC BAA-895                              | 1.60E-169 | BamD  | YP_001455426.1 | outer membrane protein assembly complex subunit YfiO          |
| Citrobacter koseri ATCC BAA-895                              | 8.80E-005 | BamD  | YP_001454159.1 | copper/silver efflux system outer membrane protein CusC       |
| Citrobacter koseri ATCC BAA-895                              | 3.80E-070 | BamE  | YP_001455448.1 | hypothetical protein CKO_03939                                |
| Citrobacter koseri ATCC BAA-895                              | 4.80E-005 | BamE  | YP_001453329.1 | DNA-binding transcriptional activator OsmE                    |

## gamma\_e-5

|                                    |           |       |                |                                                       |
|------------------------------------|-----------|-------|----------------|-------------------------------------------------------|
| Citrobacter koseri ATCC BAA-895    | 6.70E-005 | BamE  | YP_001454614.1 | periplasmic repressor CpxP                            |
| Citrobacter koseri ATCC BAA-895    | 7.30E-005 | BamE  | YP_001455037.1 | hypothetical protein CKO_03520                        |
| Citrobacter koseri ATCC BAA-895    | 0.00E+000 | Omp85 | YP_001454710.1 | outer membrane protein assembly factor YaeT           |
| Citrobacter koseri ATCC BAA-895    | 4.70E-007 | Omp85 | YP_001455125.1 | hypothetical protein CKO_03610                        |
| Citrobacter rodentium ICC168       | 7.10E-215 | BamB  | YP_003365993.1 | dehydrogenase                                         |
| Citrobacter rodentium ICC168       | 4.30E-006 | BamB  | YP_003363782.1 | quinoprotein glucose dehydrogenase                    |
| Citrobacter rodentium ICC168       | 2.50E-222 | BamC  | YP_003365966.1 | lipoprotein                                           |
| Citrobacter rodentium ICC168       | 2.40E-173 | BamD  | YP_003366072.1 | lipoprotein                                           |
| Citrobacter rodentium ICC168       | 4.20E-069 | BamE  | YP_003366101.1 | outer membrane assembly lipoprotein                   |
| Citrobacter rodentium ICC168       | 2.80E-005 | BamE  | YP_003364902.1 | osmotically inducible lipoprotein E                   |
| Citrobacter rodentium ICC168       | 0.00E+000 | Omp85 | YP_003363826.1 | outer membrane protein assembly factor                |
| Citrobacter rodentium ICC168       | 3.00E-007 | Omp85 | YP_003366763.1 | outer membrane protein assembly factor                |
| Colwellia psychrerythraea 34H      | 1.10E-123 | BamB  | YP_270899.1    | outer membrane protein assembly complex subunit YfgL  |
| Colwellia psychrerythraea 34H      | 1.30E-008 | BamB  | YP_268617.1    | quinoprotein alcohol dehydrogenase                    |
| Colwellia psychrerythraea 34H      | 6.40E-016 | BamC  | YP_269878.1    | putative lipoprotein                                  |
| Colwellia psychrerythraea 34H      | 1.20E-164 | BamD  | YP_270574.1    | putative lipoprotein                                  |
| Colwellia psychrerythraea 34H      | 6.90E-005 | BamD  | YP_267348.1    | putative lipoprotein                                  |
| Colwellia psychrerythraea 34H      | 3.70E-034 | BamE  | YP_270489.1    | SmpA/OmlA family protein                              |
| Colwellia psychrerythraea 34H      | 7.00E-006 | BamE  | YP_268910.1    | putative lipoprotein                                  |
| Colwellia psychrerythraea 34H      | 6.70E-204 | Omp85 | YP_268303.1    | OMP85 family outer membrane protein                   |
| Colwellia psychrerythraea 34H      | 3.60E-007 | Omp85 | YP_269248.1    | OMP85 family outer membrane protein                   |
| Coxiella burnetii CbuG_Q212        | 3.00E-091 | BamD  | YP_002303712.1 | lipoprotein, ComL family                              |
| Coxiella burnetii CbuG_Q212        | 6.60E-016 | BamE  | YP_002303253.1 | OmlA                                                  |
| Coxiella burnetii CbuK_Q154        | 3.00E-094 | BamD  | YP_002305030.1 | lipoprotein, ComL family                              |
| Coxiella burnetii CbuK_Q154        | 6.60E-016 | BamE  | YP_002305502.1 | outer membrane lipoprotein                            |
| Coxiella burnetii CbuK_Q154        | 9.20E-184 | Omp85 | YP_002305755.1 | outer membrane protein assembly factor                |
| Coxiella burnetii Dugway 5J108-111 | 3.00E-094 | BamD  | YP_001424166.2 | lipoprotein, ComL family                              |
| Coxiella burnetii Dugway 5J108-111 | 6.60E-016 | BamE  | YP_001424742.1 | outer membrane lipoprotein                            |
| Coxiella burnetii Dugway 5J108-111 | 1.30E-185 | Omp85 | YP_001424030.1 | outer membrane protein assembly factor                |
| Coxiella burnetii RSA 331          | 9.20E-095 | BamD  | YP_001596931.1 | competence lipoprotein ComL                           |
| Coxiella burnetii RSA 331          | 1.30E-185 | Omp85 | YP_001596536.1 | outer membrane protein assembly complex, YaeT protein |
| Coxiella burnetii RSA 493          | 5.10E-095 | BamD  | NP_819783.2    | competence lipoprotein ComL                           |
| Coxiella burnetii RSA 493          | 4.90E-015 | BamE  | NP_820294.1    | outer membrane lipoprotein                            |
| Coxiella burnetii RSA 493          | 7.00E-185 | Omp85 | NP_819641.1    | outer membrane protein assembly complex, YaeT protein |
| Cronobacter sakazakii ATCC BAA-894 | 1.00E-201 | BamB  | YP_001436861.1 | outer membrane protein assembly complex subunit YfgL  |
| Cronobacter sakazakii ATCC BAA-894 | 8.30E-005 | BamB  | YP_001439027.1 | hypothetical protein ESA_02962                        |
| Cronobacter sakazakii ATCC BAA-894 | 2.10E-213 | BamC  | YP_001436885.1 | lipoprotein                                           |
| Cronobacter sakazakii ATCC BAA-894 | 7.00E-164 | BamD  | YP_001436778.1 | outer membrane protein assembly complex subunit YfiO  |

## gamma\_e-5

|                                    |           |       |                |                                                       |
|------------------------------------|-----------|-------|----------------|-------------------------------------------------------|
| Cronobacter sakazakii ATCC BAA-894 | 4.30E-005 | BamD  | YP_001437668.1 | tetratricopeptide repeat protein                      |
| Cronobacter sakazakii ATCC BAA-894 | 4.90E-068 | BamE  | YP_001436757.1 | hypothetical protein ESA_00638                        |
| Cronobacter sakazakii ATCC BAA-894 | 5.90E-006 | BamE  | YP_001438292.1 | hypothetical protein ESA_02207                        |
| Cronobacter sakazakii ATCC BAA-894 | 9.00E-006 | BamE  | YP_001438232.1 | DNA-binding transcriptional activator OsmE            |
| Cronobacter sakazakii ATCC BAA-894 | 6.90E-005 | BamE  | YP_001437352.1 | flagellar basal body-associated protein FliL          |
| Cronobacter sakazakii ATCC BAA-894 | 0.00E+000 | Omp85 | YP_001439224.1 | outer membrane protein assembly factor YaeT           |
| Cronobacter sakazakii ATCC BAA-894 | 3.80E-007 | Omp85 | YP_001436364.1 | hypothetical protein ESA_00227                        |
| Cronobacter turicensis z3032       | 5.90E-204 | BamB  | YP_003211469.1 | outer membrane biogenesis protein BamB                |
| Cronobacter turicensis z3032       | 5.60E-203 | BamC  | YP_003211435.1 | lipoprotein                                           |
| Cronobacter turicensis z3032       | 8.20E-150 | BamD  | YP_003211547.1 | outer membrane biogenesis protein BamD                |
| Cronobacter turicensis z3032       | 4.80E-005 | BamD  | YP_003210704.1 | tetratricopeptide repeat protein                      |
| Cronobacter turicensis z3032       | 4.80E-069 | BamE  | YP_003211566.1 | outer membrane biogenesis protein BamE                |
| Cronobacter turicensis z3032       | 8.40E-006 | BamE  | YP_003210189.1 | DNA-binding transcriptional activator OsmE            |
| Cronobacter turicensis z3032       | 6.90E-005 | BamE  | YP_003211024.1 | flagellar basal body-associated protein FliL          |
| Cronobacter turicensis z3032       | 0.00E+000 | Omp85 | YP_003209168.1 | outer membrane protein assembly factor YaeT           |
| Cronobacter turicensis z3032       | 1.90E-007 | Omp85 | YP_003212011.1 | hypothetical protein CTU_36480                        |
| Dichelobacter nodosus VCS1703A     | 6.80E-042 | BamB  | YP_001209430.1 | quinonprotein alcohol dehydrogenase family protein    |
| Dichelobacter nodosus VCS1703A     | 7.60E-007 | BamC  | YP_001209999.1 | lipoprotein                                           |
| Dichelobacter nodosus VCS1703A     | 3.90E-083 | BamD  | YP_001210176.1 | competence protein ComL                               |
| Dichelobacter nodosus VCS1703A     | 1.40E-008 | BamE  | YP_001209951.1 | SmpA/OmlA family lipoprotein                          |
| Dichelobacter nodosus VCS1703A     | 1.50E-148 | Omp85 | YP_001209590.1 | outer membrane protein                                |
| Dichelobacter nodosus VCS1703A     | 7.90E-007 | Omp85 | YP_001209758.1 | outer membrane protein                                |
| Dickeya dadantii 3937              | 1.20E-189 | BamB  | YP_003884073.1 | protein assembly complex, lipoprotein component       |
| Dickeya dadantii 3937              | 2.30E-202 | BamC  | YP_003882036.1 | Lipoprotein-34                                        |
| Dickeya dadantii 3937              | 3.70E-152 | BamD  | YP_003884204.1 | lipoprotein                                           |
| Dickeya dadantii 3937              | 2.30E-005 | BamD  | YP_003883424.1 | hypothetical protein Dda3937_04037                    |
| Dickeya dadantii 3937              | 3.50E-062 | BamE  | YP_003881667.1 | outer membrane lipoprotein OmlA                       |
| Dickeya dadantii 3937              | 2.80E-005 | BamE  | YP_003884060.1 | transmembrane protein                                 |
| Dickeya dadantii 3937              | 0.00E+000 | Omp85 | YP_003881844.1 | hypothetical protein Dda3937_01884                    |
| Dickeya dadantii 3937              | 9.70E-007 | Omp85 | YP_003884415.1 | outer membrane protein and surface antigen            |
| Dickeya dadantii Ech586            | 6.20E-187 | BamB  | YP_003334594.1 | outer membrane assembly lipoprotein YfgL              |
| Dickeya dadantii Ech586            | 5.30E-197 | BamC  | YP_003332706.1 | NlpBDapX family lipoprotein                           |
| Dickeya dadantii Ech586            | 5.20E-149 | BamD  | YP_003334706.1 | outer membrane assembly lipoprotein YfiO              |
| Dickeya dadantii Ech586            | 5.40E-006 | BamD  | YP_003333257.1 | tetratricopeptide domain-containing protein           |
| Dickeya dadantii Ech586            | 9.20E-063 | BamE  | YP_003332365.1 | SmpA/OmlA domain-containing protein                   |
| Dickeya dadantii Ech586            | 0.00E+000 | Omp85 | YP_003332528.1 | outer membrane protein assembly complex, YaeT protein |
| Dickeya dadantii Ech586            | 1.20E-006 | Omp85 | YP_003334898.1 | surface antigen (D15)                                 |
| Dickeya dadantii Ech703            | 2.50E-191 | BamB  | YP_002988333.1 | outer membrane protein assembly complex subunit YfgL  |

## gamma\_e-5

|                                |           |       |                |                                                      |
|--------------------------------|-----------|-------|----------------|------------------------------------------------------|
| Escherichia coli B str. REL606 | 1.70E-174 | BamD  | YP_003045674.1 | outer membrane protein assembly complex subunit YfiO |
| Escherichia coli B str. REL606 | 1.30E-007 | BamE  | YP_003045694.1 | small membrane lipoprotein                           |
| Escherichia coli B str. REL606 | 2.30E-005 | BamE  | YP_003044906.1 | DNA-binding transcriptional activator OsmE           |
| Escherichia coli B str. REL606 | 0.00E+000 | Omp85 | YP_003043404.1 | outer membrane protein assembly factor YaeT          |
| Escherichia coli B str. REL606 | 1.00E-006 | Omp85 | YP_003047261.1 | putative outer membrane protein and surface antigen  |
| Escherichia coli BW2952        | 8.70E-225 | BamB  | YP_002927473.1 | protein assembly complex, lipoprotein component      |
| Escherichia coli BW2952        | 7.50E-006 | BamB  | YP_002925319.1 | glucose dehydrogenase                                |
| Escherichia coli BW2952        | 8.10E-238 | BamC  | YP_002927438.1 | lipoprotein                                          |
| Escherichia coli BW2952        | 1.70E-174 | BamD  | YP_002927552.1 | putative lipoprotein                                 |
| Escherichia coli BW2952        | 5.80E-068 | BamE  | YP_002927572.1 | small membrane lipoprotein                           |
| Escherichia coli BW2952        | 2.30E-005 | BamE  | YP_002926749.1 | DNA-binding transcriptional activator                |
| Escherichia coli BW2952        | 0.00E+000 | Omp85 | YP_002925371.1 | hypothetical protein BWG_0169                        |
| Escherichia coli BW2952        | 9.30E-007 | Omp85 | YP_002929122.1 | putative outer membrane protein and surface antigen  |
| Escherichia coli CFT073        | 1.30E-225 | BamB  | NP_754916.1    | outer membrane protein assembly complex subunit YfgL |
| Escherichia coli CFT073        | 8.30E-006 | BamB  | NP_752103.1    | glucose dehydrogenase                                |
| Escherichia coli CFT073        | 2.70E-237 | BamC  | NP_754887.1    | lipoprotein                                          |
| Escherichia coli CFT073        | 1.70E-174 | BamD  | NP_754998.1    | outer membrane protein assembly complex subunit YfiO |
| Escherichia coli CFT073        | 5.80E-068 | BamE  | NP_755021.1    | hypothetical protein c3139                           |
| Escherichia coli CFT073        | 2.30E-005 | BamE  | NP_754032.1    | DNA-binding transcriptional activator OsmE           |
| Escherichia coli CFT073        | 0.00E+000 | Omp85 | NP_752162.1    | outer membrane protein assembly factor YaeT          |
| Escherichia coli CFT073        | 1.10E-006 | Omp85 | NP_757165.1    | hypothetical protein c5318                           |
| Escherichia coli E24377A       | 6.60E-225 | BamB  | YP_001463834.1 | outer membrane protein assembly complex subunit YfgL |
| Escherichia coli E24377A       | 1.10E-005 | BamB  | YP_001461292.1 | glucose dehydrogenase                                |
| Escherichia coli E24377A       | 8.10E-238 | BamC  | YP_001463802.1 | lipoprotein                                          |
| Escherichia coli E24377A       | 1.70E-174 | BamD  | YP_001463916.1 | outer membrane protein assembly complex subunit YfiO |
| Escherichia coli E24377A       | 5.80E-068 | BamE  | YP_001463936.1 | hypothetical protein EcE24377A_2901                  |
| Escherichia coli E24377A       | 2.30E-005 | BamE  | YP_001463035.1 | DNA-binding transcriptional activator OsmE           |
| Escherichia coli E24377A       | 0.00E+000 | Omp85 | YP_001461346.1 | outer membrane protein assembly factor YaeT          |
| Escherichia coli E24377A       | 1.10E-006 | Omp85 | YP_001465728.1 | OMP85 family outer membrane protein                  |
| Escherichia coli ED1a          | 1.30E-225 | BamB  | YP_002398844.1 | outer membrane protein assembly complex subunit YfgL |
| Escherichia coli ED1a          | 8.30E-006 | BamB  | YP_002396214.1 | glucose dehydrogenase                                |
| Escherichia coli ED1a          | 9.00E-236 | BamC  | YP_002398816.1 | lipoprotein                                          |
| Escherichia coli ED1a          | 1.70E-174 | BamD  | YP_002398926.1 | outer membrane protein assembly complex subunit YfiO |
| Escherichia coli ED1a          | 5.80E-068 | BamE  | YP_002398946.1 | hypothetical protein ECED1_3055                      |
| Escherichia coli ED1a          | 2.30E-005 | BamE  | YP_002397892.1 | DNA-binding transcriptional activator OsmE           |
| Escherichia coli ED1a          | 0.00E+000 | Omp85 | YP_002396264.1 | outer membrane protein assembly factor YaeT          |
| Escherichia coli ED1a          | 9.70E-007 | Omp85 | YP_002400823.1 | hypothetical protein ECED1_5078                      |
| Escherichia coli HS            | 6.60E-225 | BamB  | YP_001459305.1 | outer membrane protein assembly complex subunit YfgL |



## gamma\_e-5

|                                     |           |       |                |                                                      |
|-------------------------------------|-----------|-------|----------------|------------------------------------------------------|
| Escherichia coli HS                 | 7.30E-006 | BamB  | YP_001456910.1 | glucose dehydrogenase                                |
| Escherichia coli HS                 | 8.10E-238 | BamC  | YP_001459257.1 | lipoprotein                                          |
| Escherichia coli HS                 | 1.70E-174 | BamD  | YP_001459389.1 | outer membrane protein assembly complex subunit YfiO |
| Escherichia coli HS                 | 5.80E-068 | BamE  | YP_001459410.1 | hypothetical protein EcHS_A2775                      |
| Escherichia coli HS                 | 2.30E-005 | BamE  | YP_001458517.1 | DNA-binding transcriptional activator OsmE           |
| Escherichia coli HS                 | 0.00E+000 | Omp85 | YP_001456960.1 | outer membrane protein assembly factor YaeT          |
| Escherichia coli HS                 | 9.30E-007 | Omp85 | YP_001461013.1 | OMP85 family outer membrane protein                  |
| Escherichia coli IA11               | 1.10E-223 | BamB  | YP_002387950.1 | outer membrane protein assembly complex subunit YfgL |
| Escherichia coli IA11               | 7.30E-006 | BamB  | YP_002385618.1 | glucose dehydrogenase                                |
| Escherichia coli IA11               | 8.10E-238 | BamC  | YP_002387916.1 | lipoprotein                                          |
| Escherichia coli IA11               | 1.70E-174 | BamD  | YP_002388088.1 | outer membrane protein assembly complex subunit YfiO |
| Escherichia coli IA11               | 5.80E-068 | BamE  | YP_002388109.1 | hypothetical protein ECIAI1_2738                     |
| Escherichia coli IA11               | 2.30E-005 | BamE  | YP_002387218.1 | DNA-binding transcriptional activator OsmE           |
| Escherichia coli IA11               | 0.00E+000 | Omp85 | YP_002385671.1 | outer membrane protein assembly factor YaeT          |
| Escherichia coli IA11               | 9.30E-007 | Omp85 | YP_002389686.1 | hypothetical protein ECIAI1_4453                     |
| Escherichia coli IA139              | 2.30E-225 | BamB  | YP_002408651.1 | outer membrane protein assembly complex subunit YfgL |
| Escherichia coli IA139              | 1.10E-005 | BamB  | YP_002406173.1 | glucose dehydrogenase                                |
| Escherichia coli IA139              | 2.70E-237 | BamC  | YP_002408564.1 | lipoprotein                                          |
| Escherichia coli IA139              | 1.70E-174 | BamD  | YP_002408736.1 | outer membrane protein assembly complex subunit YfiO |
| Escherichia coli IA139              | 5.80E-068 | BamE  | YP_002408757.1 | hypothetical protein ECIAI39_2820                    |
| Escherichia coli IA139              | 2.30E-005 | BamE  | YP_002407323.1 | DNA-binding transcriptional activator OsmE           |
| Escherichia coli IA139              | 0.00E+000 | Omp85 | YP_002406226.1 | outer membrane protein assembly factor YaeT          |
| Escherichia coli IA139              | 1.10E-006 | Omp85 | YP_002410552.1 | hypothetical protein ECIAI39_4691                    |
| Escherichia coli O103:H2 str. 12009 | 5.10E-224 | BamB  | YP_003222920.1 | protein assembly complex, lipoprotein component      |
| Escherichia coli O103:H2 str. 12009 | 7.30E-006 | BamB  | YP_003220136.1 | glucose dehydrogenase                                |
| Escherichia coli O103:H2 str. 12009 | 8.10E-238 | BamC  | YP_003222889.1 | lipoprotein NlpB                                     |
| Escherichia coli O103:H2 str. 12009 | 1.70E-174 | BamD  | YP_003223055.1 | putative lipoprotein                                 |
| Escherichia coli O103:H2 str. 12009 | 5.80E-068 | BamE  | YP_003223076.1 | small membrane lipoprotein SmpA                      |
| Escherichia coli O103:H2 str. 12009 | 2.30E-005 | BamE  | YP_003221867.1 | DNA-binding transcriptional activator OsmE           |
| Escherichia coli O103:H2 str. 12009 | 0.00E+000 | Omp85 | YP_003220187.1 | Omp85 family protein                                 |
| Escherichia coli O103:H2 str. 12009 | 9.30E-007 | Omp85 | YP_003224833.1 | putative outer membrane protein and surface antigen  |
| Escherichia coli O111:H- str. 11128 | 1.10E-223 | BamB  | YP_003235603.1 | protein assembly complex, lipoprotein component      |
| Escherichia coli O111:H- str. 11128 | 1.10E-005 | BamB  | YP_003232677.1 | glucose dehydrogenase                                |
| Escherichia coli O111:H- str. 11128 | 8.10E-238 | BamC  | YP_003235569.1 | lipoprotein NlpB                                     |
| Escherichia coli O111:H- str. 11128 | 1.70E-174 | BamD  | YP_003235679.1 | putative lipoprotein                                 |
| Escherichia coli O111:H- str. 11128 | 5.80E-068 | BamE  | YP_003235699.1 | small membrane lipoprotein SmpA                      |
| Escherichia coli O111:H- str. 11128 | 2.30E-005 | BamE  | YP_003234666.1 | DNA-binding transcriptional activator OsmE           |
| Escherichia coli O111:H- str. 11128 | 0.00E+000 | Omp85 | YP_003232728.1 | Omp85 family protein                                 |

## gamma\_e-5

|                                        |           |       |                |                                                       |
|----------------------------------------|-----------|-------|----------------|-------------------------------------------------------|
| Escherichia coli O111:H- str. 11128    | 8.00E-007 | Omp85 | YP_003237380.1 | putative outer membrane protein and surface antigen   |
| Escherichia coli O127:H6 str. E2348/69 | 3.20E-225 | BamB  | YP_002330293.1 | outer membrane protein assembly complex subunit YfgL  |
| Escherichia coli O127:H6 str. E2348/69 | 9.90E-006 | BamB  | YP_002327719.1 | glucose dehydrogenase                                 |
| Escherichia coli O127:H6 str. E2348/69 | 2.70E-237 | BamC  | YP_002330212.1 | lipoprotein                                           |
| Escherichia coli O127:H6 str. E2348/69 | 1.70E-174 | BamD  | YP_002330365.1 | outer membrane protein assembly complex subunit YfiO  |
| Escherichia coli O127:H6 str. E2348/69 | 5.80E-068 | BamE  | YP_002330397.1 | hypothetical protein E2348C_2905                      |
| Escherichia coli O127:H6 str. E2348/69 | 2.30E-005 | BamE  | YP_002329387.1 | DNA-binding transcriptional activator OsmE            |
| Escherichia coli O127:H6 str. E2348/69 | 0.00E+000 | Omp85 | YP_002327769.1 | outer membrane protein assembly factor YaeT           |
| Escherichia coli O127:H6 str. E2348/69 | 9.50E-007 | Omp85 | YP_002332000.1 | predicted outer membrane protein and surface antigen  |
| Escherichia coli O157:H7 str. EC4115   | 1.30E-223 | BamB  | YP_002271982.1 | outer membrane assembly lipoprotein YfgL              |
| Escherichia coli O157:H7 str. EC4115   | 1.10E-005 | BamB  | YP_002268732.1 | quinoprotein glucose dehydrogenase                    |
| Escherichia coli O157:H7 str. EC4115   | 6.90E-237 | BamC  | YP_002271946.1 | lipoprotein, NlpB/DapX family                         |
| Escherichia coli O157:H7 str. EC4115   | 1.70E-174 | BamD  | YP_002272068.1 | outer membrane assembly lipoprotein YfiO              |
| Escherichia coli O157:H7 str. EC4115   | 5.80E-068 | BamE  | YP_002272086.1 | lipoprotein, SmpA/OmlA family                         |
| Escherichia coli O157:H7 str. EC4115   | 2.30E-005 | BamE  | YP_002270808.1 | osmotically-inducible lipoprotein E                   |
| Escherichia coli O157:H7 str. EC4115   | 0.00E+000 | Omp85 | YP_002268785.1 | outer membrane protein assembly complex, YaeT protein |
| Escherichia coli O157:H7 str. EC4115   | 9.30E-007 | Omp85 | YP_002273764.1 | outer membrane protein, OMP85 family                  |
| Escherichia coli O157:H7 str. EDL933   | 1.30E-223 | BamB  | NP_289065.1    | outer membrane protein assembly complex subunit YfgL  |
| Escherichia coli O157:H7 str. EDL933   | 1.10E-005 | BamB  | NP_285820.1    | glucose dehydrogenase                                 |
| Escherichia coli O157:H7 str. EDL933   | 1.70E-235 | BamC  | NP_289030.2    | lipoprotein                                           |
| Escherichia coli O157:H7 str. EDL933   | 1.70E-174 | BamD  | NP_289150.1    | outer membrane protein assembly complex subunit YfiO  |
| Escherichia coli O157:H7 str. EDL933   | 1.30E-007 | BamE  | NP_289169.1    | small membrane protein A                              |
| Escherichia coli O157:H7 str. EDL933   | 2.30E-005 | BamE  | NP_288172.1    | DNA-binding transcriptional activator OsmE            |
| Escherichia coli O157:H7 str. EDL933   | 0.00E+000 | Omp85 | NP_285871.1    | outer membrane protein assembly factor YaeT           |
| Escherichia coli O157:H7 str. EDL933   | 8.70E-007 | Omp85 | NP_290852.1    | hypothetical protein Z5831                            |
| Escherichia coli O157:H7 str. Sakai    | 1.30E-223 | BamB  | NP_311401.1    | outer membrane protein assembly complex subunit YfgL  |
| Escherichia coli O157:H7 str. Sakai    | 1.10E-005 | BamB  | NP_308155.1    | glucose dehydrogenase                                 |
| Escherichia coli O157:H7 str. Sakai    | 6.90E-237 | BamC  | NP_311366.2    | lipoprotein                                           |
| Escherichia coli O157:H7 str. Sakai    | 1.70E-174 | BamD  | NP_311485.1    | outer membrane protein assembly complex subunit YfiO  |
| Escherichia coli O157:H7 str. Sakai    | 1.30E-007 | BamE  | NP_311506.1    | small membrane protein A                              |
| Escherichia coli O157:H7 str. Sakai    | 2.30E-005 | BamE  | NP_310472.1    | DNA-binding transcriptional activator OsmE            |
| Escherichia coli O157:H7 str. Sakai    | 0.00E+000 | Omp85 | NP_308206.1    | outer membrane protein assembly factor YaeT           |
| Escherichia coli O157:H7 str. Sakai    | 9.30E-007 | Omp85 | NP_313225.1    | hypothetical protein ECs5198                          |
| Escherichia coli O157:H7 str. TW14359  | 1.30E-223 | BamB  | YP_003079295.1 | outer membrane protein assembly complex subunit YfgL  |
| Escherichia coli O157:H7 str. TW14359  | 1.10E-005 | BamB  | YP_003076096.1 | glucose dehydrogenase                                 |
| Escherichia coli O157:H7 str. TW14359  | 6.90E-237 | BamC  | YP_003079259.1 | lipoprotein                                           |
| Escherichia coli O157:H7 str. TW14359  | 1.70E-174 | BamD  | YP_003079380.1 | outer membrane protein assembly complex subunit YfiO  |
| Escherichia coli O157:H7 str. TW14359  | 5.80E-068 | BamE  | YP_003079399.1 | hypothetical protein ECSP_3561                        |

## gamma\_e-5

|                                       |           |       |                |                                                       |
|---------------------------------------|-----------|-------|----------------|-------------------------------------------------------|
| Escherichia coli O157:H7 str. TW14359 | 2.30E-005 | BamE  | YP_003078194.1 | DNA-binding transcriptional activator OsmE            |
| Escherichia coli O157:H7 str. TW14359 | 0.00E+000 | Omp85 | YP_003076147.1 | outer membrane protein assembly factor YaeT           |
| Escherichia coli O157:H7 str. TW14359 | 9.30E-007 | Omp85 | YP_003081078.1 | putative outer membrane protein and surface antigen   |
| Escherichia coli O26:H11 str. 11368   | 1.10E-223 | BamB  | YP_003230497.1 | outer membrane protein assembly complex subunit YfgL  |
| Escherichia coli O26:H11 str. 11368   | 1.10E-005 | BamB  | YP_003227227.1 | glucose dehydrogenase                                 |
| Escherichia coli O26:H11 str. 11368   | 8.10E-238 | BamC  | YP_003230463.1 | lipoprotein                                           |
| Escherichia coli O26:H11 str. 11368   | 1.70E-174 | BamD  | YP_003230576.1 | outer membrane protein assembly complex subunit YfiO  |
| Escherichia coli O26:H11 str. 11368   | 5.80E-068 | BamE  | YP_003230596.1 | hypothetical protein ECO26_3658                       |
| Escherichia coli O26:H11 str. 11368   | 2.30E-005 | BamE  | YP_003229495.1 | DNA-binding transcriptional activator OsmE            |
| Escherichia coli O26:H11 str. 11368   | 0.00E+000 | Omp85 | YP_003227278.1 | outer membrane protein assembly factor YaeT           |
| Escherichia coli O26:H11 str. 11368   | 9.30E-007 | Omp85 | YP_003232265.1 | outer membrane protein and surface antigen            |
| Escherichia coli O55:H7 str. CB9615   | 6.60E-225 | BamB  | YP_003500551.1 | outer membrane assembly lipoprotein YfgL              |
| Escherichia coli O55:H7 str. CB9615   | 1.10E-005 | BamB  | YP_003497766.1 | Quinoprotein glucose dehydrogenase                    |
| Escherichia coli O55:H7 str. CB9615   | 3.00E-236 | BamC  | YP_003500515.1 | lipoprotein-34                                        |
| Escherichia coli O55:H7 str. CB9615   | 1.70E-174 | BamD  | YP_003500686.1 | lipoprotein                                           |
| Escherichia coli O55:H7 str. CB9615   | 5.80E-068 | BamE  | YP_003500706.1 | lipoprotein, SmpA/OmlA family                         |
| Escherichia coli O55:H7 str. CB9615   | 2.30E-005 | BamE  | YP_003499736.1 | Osmotically-inducible lipoprotein E precursor         |
| Escherichia coli O55:H7 str. CB9615   | 7.30E-005 | BamE  | YP_003500795.1 | hypothetical protein G2583_3290                       |
| Escherichia coli O55:H7 str. CB9615   | 0.00E+000 | Omp85 | YP_003497817.1 | outer membrane protein assembly factor yaeT precursor |
| Escherichia coli O55:H7 str. CB9615   | 9.30E-007 | Omp85 | YP_003502452.1 | hypothetical protein G2583_5050                       |
| Escherichia coli S88                  | 1.30E-225 | BamB  | YP_002392351.1 | outer membrane protein assembly complex subunit YfgL  |
| Escherichia coli S88                  | 9.30E-006 | BamB  | YP_002389980.1 | glucose dehydrogenase                                 |
| Escherichia coli S88                  | 2.70E-237 | BamC  | YP_002392326.1 | lipoprotein                                           |
| Escherichia coli S88                  | 1.70E-174 | BamD  | YP_002392429.1 | outer membrane protein assembly complex subunit YfiO  |
| Escherichia coli S88                  | 5.80E-068 | BamE  | YP_002392449.1 | hypothetical protein ECS88_2803                       |
| Escherichia coli S88                  | 2.30E-005 | BamE  | YP_002391520.1 | DNA-binding transcriptional activator OsmE            |
| Escherichia coli S88                  | 0.00E+000 | Omp85 | YP_002390031.1 | outer membrane protein assembly factor YaeT           |
| Escherichia coli S88                  | 1.10E-006 | Omp85 | YP_002394297.1 | hypothetical protein ECS88_4813                       |
| Escherichia coli SE11                 | 5.10E-224 | BamB  | YP_002294073.1 | outer membrane protein assembly complex subunit YfgL  |
| Escherichia coli SE11                 | 7.30E-006 | BamB  | YP_002291399.1 | glucose dehydrogenase                                 |
| Escherichia coli SE11                 | 8.10E-238 | BamC  | YP_002294036.1 | lipoprotein                                           |
| Escherichia coli SE11                 | 1.70E-174 | BamD  | YP_002294156.1 | outer membrane protein assembly complex subunit YfiO  |
| Escherichia coli SE11                 | 5.80E-068 | BamE  | YP_002294175.1 | hypothetical protein ECSE_2900                        |
| Escherichia coli SE11                 | 2.30E-005 | BamE  | YP_002293184.1 | DNA-binding transcriptional activator OsmE            |
| Escherichia coli SE11                 | 0.00E+000 | Omp85 | YP_002291451.1 | outer membrane protein assembly factor YaeT           |
| Escherichia coli SE11                 | 9.30E-007 | Omp85 | YP_002295801.1 | hypothetical protein ECSE_4526                        |
| Escherichia coli SMS-3-5              | 4.70E-225 | BamB  | YP_001744700.1 | outer membrane protein assembly complex subunit YfgL  |
| Escherichia coli SMS-3-5              | 7.50E-006 | BamB  | YP_001742251.1 | quinoprotein glucose dehydrogenase                    |

## gamma\_e-5

|                                           |           |       |                |                                                                                                                                                         |
|-------------------------------------------|-----------|-------|----------------|---------------------------------------------------------------------------------------------------------------------------------------------------------|
| Escherichia coli SMS-3-5                  | 8.10E-238 | BamC  | YP_001744660.1 | lipoprotein                                                                                                                                             |
| Escherichia coli SMS-3-5                  | 1.70E-174 | BamD  | YP_001744780.1 | outer membrane protein assembly complex subunit YfiO                                                                                                    |
| Escherichia coli SMS-3-5                  | 2.10E-067 | BamE  | YP_001744800.1 | hypothetical protein EcSMS35_2769                                                                                                                       |
| Escherichia coli SMS-3-5                  | 2.30E-005 | BamE  | YP_001743510.1 | DNA-binding transcriptional activator OsmE                                                                                                              |
| Escherichia coli SMS-3-5                  | 0.00E+000 | Omp85 | YP_001742305.1 | outer membrane protein assembly factor YaeT                                                                                                             |
| Escherichia coli SMS-3-5                  | 1.10E-006 | Omp85 | YP_001746623.1 | OMP85 family outer membrane protein                                                                                                                     |
| Escherichia coli str. K-12 substr. DH10B  | 8.70E-225 | BamB  | YP_001731442.1 | outer membrane protein assembly complex subunit YfgL                                                                                                    |
| Escherichia coli str. K-12 substr. DH10B  | 7.50E-006 | BamB  | YP_001729081.1 | glucose dehydrogenase                                                                                                                                   |
| Escherichia coli str. K-12 substr. DH10B  | 8.10E-238 | BamC  | YP_001731407.1 | lipoprotein                                                                                                                                             |
| Escherichia coli str. K-12 substr. DH10B  | 1.70E-174 | BamD  | YP_001731520.1 | outer membrane protein assembly complex subunit YfiO                                                                                                    |
| Escherichia coli str. K-12 substr. DH10B  | 5.80E-068 | BamE  | YP_001731539.1 | hypothetical protein ECDH10B_2783                                                                                                                       |
| Escherichia coli str. K-12 substr. DH10B  | 2.30E-005 | BamE  | YP_001730716.1 | DNA-binding transcriptional activator OsmE                                                                                                              |
| Escherichia coli str. K-12 substr. DH10B  | 0.00E+000 | Omp85 | YP_001729133.1 | outer membrane protein assembly factor YaeT                                                                                                             |
| Escherichia coli str. K-12 substr. DH10B  | 9.30E-007 | Omp85 | YP_001732984.1 | outer membrane protein and surface antigen                                                                                                              |
| Escherichia coli str. K-12 substr. MG1655 | 8.70E-225 | BamB  | NP_417007.1    | lipoprotein required for OM biogenesis, in BamABCDE complex                                                                                             |
| Escherichia coli str. K-12 substr. MG1655 | 7.50E-006 | BamB  | NP_414666.1    | glucose dehydrogenase                                                                                                                                   |
| Escherichia coli str. K-12 substr. MG1655 | 8.10E-238 | BamC  | NP_416972.4    | lipoprotein required for OM biogenesis, in BamABCDE complex                                                                                             |
| Escherichia coli str. K-12 substr. MG1655 | 1.70E-174 | BamD  | NP_417086.1    | lipoprotein required for OM biogenesis, in BamABCDE complex                                                                                             |
| Escherichia coli str. K-12 substr. MG1655 | 5.80E-068 | BamE  | NP_417107.2    | lipoprotein component of BamABCDE OM biogenesis complex                                                                                                 |
| Escherichia coli str. K-12 substr. MG1655 | 2.30E-005 | BamE  | NP_416253.1    | DNA-binding transcriptional activator<br>outer membrane protein assembly factor, forms pores, required for OM biogenesis in BamABCDE OM protein complex |
| Escherichia coli str. K-12 substr. MG1655 | 0.00E+000 | Omp85 | NP_414719.1    |                                                                                                                                                         |
| Escherichia coli str. K-12 substr. MG1655 | 9.30E-007 | Omp85 | NP_418641.1    | predicted outer membrane protein and surface antigen                                                                                                    |
| Escherichia coli UMN026                   | 6.60E-225 | BamB  | YP_002413534.1 | outer membrane protein assembly complex subunit YfgL                                                                                                    |
| Escherichia coli UMN026                   | 7.50E-006 | BamB  | YP_002410900.1 | glucose dehydrogenase                                                                                                                                   |
| Escherichia coli UMN026                   | 8.10E-238 | BamC  | YP_002413495.1 | lipoprotein                                                                                                                                             |
| Escherichia coli UMN026                   | 1.70E-174 | BamD  | YP_002413616.1 | outer membrane protein assembly complex subunit YfiO                                                                                                    |
| Escherichia coli UMN026                   | 5.80E-068 | BamE  | YP_002413636.1 | hypothetical protein ECUMN_2941                                                                                                                         |
| Escherichia coli UMN026                   | 2.30E-005 | BamE  | YP_002412756.1 | DNA-binding transcriptional activator OsmE                                                                                                              |
| Escherichia coli UMN026                   | 0.00E+000 | Omp85 | YP_002410950.1 | outer membrane protein assembly factor YaeT                                                                                                             |
| Escherichia coli UMN026                   | 1.10E-006 | Omp85 | YP_002415352.1 | hypothetical protein ECUMN_4756                                                                                                                         |
| Escherichia coli UTI89                    | 1.30E-225 | BamB  | YP_541824.1    | outer membrane protein assembly complex subunit YfgL                                                                                                    |
| Escherichia coli UTI89                    | 9.30E-006 | BamB  | YP_539178.1    | glucose dehydrogenase                                                                                                                                   |
| Escherichia coli UTI89                    | 2.70E-237 | BamC  | YP_541795.1    | lipoprotein                                                                                                                                             |
| Escherichia coli UTI89                    | 1.70E-174 | BamD  | YP_541915.1    | outer membrane protein assembly complex subunit YfiO                                                                                                    |
| Escherichia coli UTI89                    | 5.80E-068 | BamE  | YP_541938.1    | hypothetical protein UTI89_C2951                                                                                                                        |
| Escherichia coli UTI89                    | 2.30E-005 | BamE  | YP_540940.1    | DNA-binding transcriptional activator OsmE                                                                                                              |
| Escherichia coli UTI89                    | 0.00E+000 | Omp85 | YP_539233.1    | outer membrane protein assembly factor YaeT                                                                                                             |

## gamma\_e-5

|                                                         |           |       |                |                                                                                                                                |
|---------------------------------------------------------|-----------|-------|----------------|--------------------------------------------------------------------------------------------------------------------------------|
| Escherichia coli UTI89                                  | 1.00E-006 | Omp85 | YP_543763.1    | hypothetical protein UTI89_C4828                                                                                               |
| Escherichia fergusonii ATCC 35469                       | 2.70E-213 | BamB  | YP_002381842.1 | outer membrane protein assembly complex subunit YfgL                                                                           |
| Escherichia fergusonii ATCC 35469                       | 7.50E-006 | BamB  | YP_002381371.1 | glucose dehydrogenase                                                                                                          |
| Escherichia fergusonii ATCC 35469                       | 4.00E-231 | BamC  | YP_002381880.1 | lipoprotein                                                                                                                    |
| Escherichia fergusonii ATCC 35469                       | 2.00E-172 | BamD  | YP_002381673.1 | outer membrane protein assembly complex subunit YfiO                                                                           |
| Escherichia fergusonii ATCC 35469                       | 5.80E-068 | BamE  | YP_002381656.1 | hypothetical protein EFER_0456                                                                                                 |
| Escherichia fergusonii ATCC 35469                       | 4.60E-005 | BamE  | YP_002382483.1 | DNA-binding transcriptional activator OsmE                                                                                     |
| Escherichia fergusonii ATCC 35469                       | 8.80E-005 | BamE  | YP_002385231.1 | N-acetylmuramoyl-L-alanine amidase II                                                                                          |
| Escherichia fergusonii ATCC 35469                       | 0.00E+000 | Omp85 | YP_002381423.1 | outer membrane protein assembly factor YaeT                                                                                    |
| Escherichia fergusonii ATCC 35469                       | 1.10E-006 | Omp85 | YP_002385308.1 | hypothetical protein EFER_4300                                                                                                 |
| Ferrimonas balearica DSM 9799                           | 1.80E-140 | BamB  | YP_003914020.1 | outer membrane assembly lipoprotein YfgL                                                                                       |
| Ferrimonas balearica DSM 9799                           | 2.60E-042 | BamC  | YP_003912570.1 | NlpBDapX family lipoprotein                                                                                                    |
| Ferrimonas balearica DSM 9799                           | 2.70E-138 | BamD  | YP_003912082.1 | outer membrane assembly lipoprotein YfiO                                                                                       |
| Ferrimonas balearica DSM 9799                           | 1.20E-005 | BamD  | YP_003913913.1 | hypothetical protein FbaI_2637                                                                                                 |
| Ferrimonas balearica DSM 9799                           | 3.00E-043 | BamE  | YP_003914182.1 | SmpA/OmlA domain protein                                                                                                       |
| Ferrimonas balearica DSM 9799                           | 9.80E-231 | Omp85 | YP_003912243.1 | outer membrane protein assembly complex, YaeT protein                                                                          |
| Ferrimonas balearica DSM 9799                           | 4.30E-009 | Omp85 | YP_003912718.1 | surface antigen (D15)                                                                                                          |
| Francisella philomiragia subsp. philomiragia ATCC 25017 | 1.20E-046 | BamB  | YP_001677793.1 | hypothetical protein Fphi_1069                                                                                                 |
| Francisella philomiragia subsp. philomiragia ATCC 25017 | 4.50E-049 | BamD  | YP_001678147.1 | competence lipoprotein ComL                                                                                                    |
| Francisella philomiragia subsp. philomiragia ATCC 25017 | 1.70E-010 | BamE  | YP_001677446.1 | outer membrane lipoprotein                                                                                                     |
| Francisella philomiragia subsp. philomiragia ATCC 25017 | 0.00E+000 | Omp85 | YP_001677922.1 | outer hypothetical protein                                                                                                     |
| Francisella sp. TX077308                                | 1.90E-038 | BamB  | YP_004647193.1 | outer membrane protein YfgL, lipoprotein component of the protein assembly complex (forms a complex with YaeT, YfiO, and NlpB) |
| Francisella sp. TX077308                                | 7.40E-048 | BamD  | YP_004647589.1 | lipoprotein assembly complex protein                                                                                           |
| Francisella sp. TX077308                                | 2.30E-010 | BamE  | YP_004646622.1 | outer membrane lipoprotein SmpA                                                                                                |
| Francisella sp. TX077308                                | 0.00E+000 | Omp85 | YP_004647319.1 | outer membrane protein assembly factor YaeT                                                                                    |
| Francisella tularensis subsp. holarctica FTNF002-00     | 3.70E-044 | BamB  | YP_001429258.1 | lipoprotein                                                                                                                    |
| Francisella tularensis subsp. holarctica FTNF002-00     | 1.40E-051 | BamD  | YP_001428171.2 | lipoprotein                                                                                                                    |
| Francisella tularensis subsp. holarctica FTNF002-00     | 5.00E-009 | BamE  | YP_001427511.1 | Smp A/Oml family membrane lipoprotein                                                                                          |
| Francisella tularensis subsp. holarctica FTNF002-00     | 0.00E+000 | Omp85 | YP_001428000.2 | outer membrane protein                                                                                                         |
| Francisella tularensis subsp. holarctica LVS            | 3.70E-044 | BamB  | YP_514355.1    | lipoprotein                                                                                                                    |
| Francisella tularensis subsp. holarctica LVS            | 1.40E-051 | BamD  | YP_513451.1    | lipoprotein                                                                                                                    |
| Francisella tularensis subsp. holarctica LVS            | 5.00E-009 | BamE  | YP_512873.1    | outer membrane lipoprotein                                                                                                     |
| Francisella tularensis subsp. holarctica LVS            | 0.00E+000 | Omp85 | YP_513304.1    | outer membrane protein                                                                                                         |
| Francisella tularensis subsp. holarctica OSU18          | 3.70E-044 | BamB  | YP_764076.1    | hypothetical protein FTH_1663                                                                                                  |
| Francisella tularensis subsp. holarctica OSU18          | 8.60E-051 | BamD  | YP_763288.1    | hypothetical protein FTH_0702                                                                                                  |
| Francisella tularensis subsp. holarctica OSU18          | 5.00E-009 | BamE  | YP_762754.1    | outer membrane lipoprotein                                                                                                     |
| Francisella tularensis subsp. holarctica OSU18          | 0.00E+000 | Omp85 | YP_763147.1    | outer membrane protein/protective antigen                                                                                      |

## gamma\_e-5

|                                                    |           |       |                |                                                       |
|----------------------------------------------------|-----------|-------|----------------|-------------------------------------------------------|
| Francisella tularensis subsp. mediasiatica FSC147  | 1.10E-044 | BamB  | YP_001891084.1 | outer membrane assembly lipoprotein YfgL              |
| Francisella tularensis subsp. mediasiatica FSC147  | 1.40E-051 | BamD  | YP_001891796.1 | competence lipoprotein ComL                           |
| Francisella tularensis subsp. mediasiatica FSC147  | 1.60E-009 | BamE  | YP_001890931.1 | outer membrane lipoprotein                            |
| Francisella tularensis subsp. mediasiatica FSC147  | 0.00E+000 | Omp85 | YP_001891156.1 | conserved outer membrane protein of unknown function  |
| Francisella tularensis subsp. novicida U112        | 5.90E-044 | BamB  | YP_899166.1    | hypothetical protein FTN_1548                         |
| Francisella tularensis subsp. novicida U112        | 1.40E-051 | BamD  | YP_898898.1    | competence lipoprotein ComL                           |
| Francisella tularensis subsp. novicida U112        | 1.30E-009 | BamE  | YP_897770.1    | outer membrane lipoprotein                            |
| Francisella tularensis subsp. novicida U112        | 0.00E+000 | Omp85 | YP_899103.1    | outer membrane protein of unknown function            |
| Francisella tularensis subsp. tularensis FSC198    | 1.10E-044 | BamB  | YP_666362.1    | lipoprotein                                           |
| Francisella tularensis subsp. tularensis FSC198    | 1.40E-051 | BamD  | YP_667334.1    | lipoprotein                                           |
| Francisella tularensis subsp. tularensis FSC198    | 1.60E-009 | BamE  | YP_667719.1    | outer membrane lipoprotein                            |
| Francisella tularensis subsp. tularensis FSC198    | 0.00E+000 | Omp85 | YP_667627.1    | outer membrane protein                                |
| Francisella tularensis subsp. tularensis SCHU S4   | 1.10E-044 | BamB  | YP_169231.1    | lipoprotein                                           |
| Francisella tularensis subsp. tularensis SCHU S4   | 1.40E-051 | BamD  | YP_170202.1    | lipoprotein                                           |
| Francisella tularensis subsp. tularensis SCHU S4   | 1.60E-009 | BamE  | YP_170586.1    | outer membrane lipoprotein                            |
| Francisella tularensis subsp. tularensis SCHU S4   | 0.00E+000 | Omp85 | YP_170495.1    | outer membrane protein                                |
| Francisella tularensis subsp. tularensis WY96-3418 | 7.60E-045 | BamB  | YP_001121340.1 | lipoprotein                                           |
| Francisella tularensis subsp. tularensis WY96-3418 | 6.10E-050 | BamD  | YP_001121708.1 | lipoprotein                                           |
| Francisella tularensis subsp. tularensis WY96-3418 | 1.60E-009 | BamE  | YP_001122700.1 | outer membrane lipoprotein                            |
| Francisella tularensis subsp. tularensis WY96-3418 | 0.00E+000 | Omp85 | YP_001121414.1 | outer membrane protein                                |
| Gallibacterium anatis UMN179                       | 3.70E-119 | BamD  | YP_004420935.1 | outer membrane protein assembly complex subunit YfiO  |
| Gallibacterium anatis UMN179                       | 3.10E-036 | BamE  | YP_004420851.1 | SmpA/OmlA family                                      |
| Gallibacterium anatis UMN179                       | 4.50E-006 | BamE  | YP_004419241.1 | outer membrane protein A                              |
| Gallibacterium anatis UMN179                       | 1.20E-178 | Omp85 | YP_004420787.1 | outer membrane protein assembly factor YaeT           |
| Gallibacterium anatis UMN179                       | 3.50E-006 | Omp85 | YP_004419926.1 | outer membrane protein assembly factor YaeT           |
| Glaciecola sp. 4H-3-7+YE-5                         | 1.50E-130 | BamB  | YP_004433438.1 | outer membrane assembly lipoprotein YfgL              |
| Glaciecola sp. 4H-3-7+YE-5                         | 1.10E-007 | BamB  | YP_004434056.1 | PQQ-dependent dehydrogenase                           |
| Glaciecola sp. 4H-3-7+YE-5                         | 8.00E-005 | BamB  | YP_004434368.1 | membrane-bound PQQ-dependent dehydrogenase            |
| Glaciecola sp. 4H-3-7+YE-5                         | 5.80E-056 | BamC  | YP_004434739.1 | NlpBDapX lipoprotein                                  |
| Glaciecola sp. 4H-3-7+YE-5                         | 5.10E-137 | BamD  | YP_004435268.1 | outer membrane assembly lipoprotein YfiO              |
| Glaciecola sp. 4H-3-7+YE-5                         | 9.10E-005 | BamD  | YP_004433617.1 | tol-pal system protein YbgF                           |
| Glaciecola sp. 4H-3-7+YE-5                         | 1.30E-037 | BamE  | YP_004434825.1 | SmpA/OmlA domain-containing protein                   |
| Glaciecola sp. 4H-3-7+YE-5                         | 7.10E-178 | Omp85 | YP_004435348.1 | outer membrane protein assembly complex, YaeT protein |
| Glaciecola sp. 4H-3-7+YE-5                         | 9.50E-006 | Omp85 | YP_004432409.1 | surface antigen (D15)                                 |
| Haemophilus ducreyi 35000HP                        | 7.20E-111 | BamD  | NP_873040.1    | putative lipoprotein                                  |
| Haemophilus ducreyi 35000HP                        | 1.20E-057 | BamE  | NP_873668.1    | small protein A                                       |
| Haemophilus ducreyi 35000HP                        | 3.20E-172 | Omp85 | NP_873652.1    | outer membrane protein D-15                           |
| Haemophilus ducreyi 35000HP                        | 1.20E-005 | Omp85 | NP_874040.1    | hypothetical protein HD1655                           |

## gamma\_e-5

|                                 |           |       |                |                                                           |
|---------------------------------|-----------|-------|----------------|-----------------------------------------------------------|
| Haemophilus influenzae 86-028NP | 5.90E-005 | BamC  | YP_247975.1    | lipoprotein                                               |
| Haemophilus influenzae 86-028NP | 9.00E-165 | BamD  | YP_247894.1    | hypothetical protein NTHI0266                             |
| Haemophilus influenzae 86-028NP | 4.20E-048 | BamE  | YP_248545.1    | small protein A                                           |
| Haemophilus influenzae 86-028NP | 2.00E-166 | Omp85 | YP_248615.1    | protective surface antigen D15                            |
| Haemophilus influenzae 86-028NP | 2.60E-006 | Omp85 | YP_248385.1    | hypothetical protein NTHI0821                             |
| Haemophilus influenzae F3031    | 2.70E-005 | BamC  | YP_004134784.1 | lipoprotein                                               |
| Haemophilus influenzae F3031    | 1.20E-163 | BamD  | YP_004136339.1 | lipoprotein                                               |
| Haemophilus influenzae F3031    | 5.70E-049 | BamE  | YP_004135864.1 | small protein a                                           |
| Haemophilus influenzae F3031    | 8.70E-089 | Omp85 | YP_004135793.1 | protective surface antigen, partial                       |
| Haemophilus influenzae F3031    | 3.40E-006 | Omp85 | YP_004136061.1 | outer membrane protein and surface antigen                |
| Haemophilus influenzae F3047    | 2.00E-005 | BamC  | YP_004138361.1 | lipoprotein                                               |
| Haemophilus influenzae F3047    | 1.20E-163 | BamD  | YP_004138441.1 | lipoprotein                                               |
| Haemophilus influenzae F3047    | 5.70E-049 | BamE  | YP_004137717.1 | small protein A                                           |
| Haemophilus influenzae F3047    | 2.30E-088 | Omp85 | YP_004137639.1 | protective surface antigen                                |
| Haemophilus influenzae F3047    | 4.80E-006 | Omp85 | YP_004137945.1 | outer membrane protein and surface antigen                |
| Haemophilus influenzae PittEE   | 7.10E-005 | BamC  | YP_001290218.1 | putative deoxyribonucleotide triphosphate pyrophosphatase |
| Haemophilus influenzae PittEE   | 4.10E-164 | BamD  | YP_001290315.1 | hypothetical protein CGSHiEE_02415                        |
| Haemophilus influenzae PittEE   | 5.50E-052 | BamE  | YP_001291268.1 | small protein A                                           |
| Haemophilus influenzae PittEE   | 1.10E-172 | Omp85 | YP_001291192.1 | protective surface antigen D15                            |
| Haemophilus influenzae PittEE   | 3.00E-006 | Omp85 | YP_001291412.1 | hypothetical protein CGSHiEE_08650                        |
| Haemophilus influenzae PittGG   | 2.90E-005 | BamC  | YP_001292152.1 | lipoprotein                                               |
| Haemophilus influenzae PittGG   | 3.50E-166 | BamD  | YP_001292068.1 | hypothetical protein CGSHiGG_03480                        |
| Haemophilus influenzae PittGG   | 5.50E-052 | BamE  | YP_001292776.1 | small protein A                                           |
| Haemophilus influenzae PittGG   | 1.00E-169 | Omp85 | YP_001292848.1 | protective surface antigen D15                            |
| Haemophilus influenzae PittGG   | 2.40E-006 | Omp85 | YP_001292623.1 | hypothetical protein CGSHiGG_06780                        |
| Haemophilus influenzae Rd KW20  | 1.70E-005 | BamC  | NP_438425.1    | lipoprotein                                               |
| Haemophilus influenzae Rd KW20  | 5.50E-161 | BamD  | NP_438345.1    | hypothetical protein HI0177                               |
| Haemophilus influenzae Rd KW20  | 5.20E-050 | BamE  | NP_438998.1    | small protein A                                           |
| Haemophilus influenzae Rd KW20  | 3.00E-169 | Omp85 | NP_439077.1    | protective surface antigen D15                            |
| Haemophilus influenzae Rd KW20  | 2.80E-006 | Omp85 | NP_438857.1    | hypothetical protein HI0698                               |
| Haemophilus parasuis SH0165     | 8.60E-126 | BamD  | YP_002475502.1 | DNA uptake lipoprotein, TPR repeat-containing protein     |
| Haemophilus parasuis SH0165     | 7.50E-057 | BamE  | YP_002475299.1 | SmpA/OmlA domain-containing protein                       |
| Haemophilus parasuis SH0165     | 3.50E-166 | Omp85 | YP_002475807.1 | protective surface antigen D15                            |
| Haemophilus parasuis SH0165     | 1.30E-005 | Omp85 | YP_002474860.1 | surface antigen (D15), outer membrane protein             |
| Haemophilus somnus 129PT        | 2.20E-139 | BamD  | YP_718576.1    | DNA uptake lipoprotein                                    |
| Haemophilus somnus 129PT        | 7.50E-042 | BamE  | YP_718435.1    | small protein A                                           |
| Haemophilus somnus 129PT        | 3.00E-164 | Omp85 | YP_719191.1    | surface antigen                                           |
| Haemophilus somnus 129PT        | 2.90E-006 | Omp85 | YP_718547.1    | outer membrane protein                                    |

## gamma\_e-5

|                                   |           |       |                |                                                       |
|-----------------------------------|-----------|-------|----------------|-------------------------------------------------------|
| Haemophilus somnus 2336           | 1.00E-138 | BamD  | YP_001783974.1 | hypothetical protein HSM_0636                         |
| Haemophilus somnus 2336           | 5.20E-048 | BamE  | YP_001783450.1 | SmpA/OmlA domain-containing protein                   |
| Haemophilus somnus 2336           | 1.30E-164 | Omp85 | YP_001784778.1 | surface antigen (D15)                                 |
| Haemophilus somnus 2336           | 3.30E-006 | Omp85 | YP_001783561.1 | surface antigen (D15)                                 |
| Hahella chejuensis KCTC 2396      | 5.90E-223 | BamB  | YP_435582.1    | WD-40 repeat-containing protein                       |
| Hahella chejuensis KCTC 2396      | 5.40E-005 | BamB  | YP_436596.1    | WD-40 repeat-containing protein                       |
| Hahella chejuensis KCTC 2396      | 8.80E-102 | BamD  | YP_436997.1    | DNA uptake lipoprotein                                |
| Hahella chejuensis KCTC 2396      | 2.40E-018 | BamE  | YP_432517.1    | small protein A (tmRNA-binding)                       |
| Hahella chejuensis KCTC 2396      | 3.70E-193 | Omp85 | YP_436344.1    | outer membrane protein/protective antigen OMA87       |
| Hahella chejuensis KCTC 2396      | 9.80E-006 | Omp85 | YP_433471.1    | outer membrane protein                                |
| Halomonas elongata DSM 2581       | 2.90E-109 | BamB  | YP_003896452.1 | pyrrolo-quinoline quinone                             |
| Halomonas elongata DSM 2581       | 8.00E-005 | BamB  | YP_003899075.1 | quinoprotein glucose dehydrogenase                    |
| Halomonas elongata DSM 2581       | 7.50E-108 | BamD  | YP_003896397.1 | lipoprotein                                           |
| Halomonas elongata DSM 2581       | 9.40E-027 | BamE  | YP_003899232.1 | outer membrane lipoprotein OmlA                       |
| Halomonas elongata DSM 2581       | 7.20E-006 | BamE  | YP_003896726.1 | outer membrane lipoprotein, OmpA/SmpA/OmlA family     |
| Halomonas elongata DSM 2581       | 1.10E-194 | Omp85 | YP_003898865.1 | hypothetical protein HELO_3796                        |
| Halomonas elongata DSM 2581       | 5.40E-007 | Omp85 | YP_003897645.1 | hypothetical protein HELO_2576                        |
| Halorhodospira halophila SL1      | 2.00E-074 | BamB  | YP_001003352.1 | Pyrrolo-quinoline quinone                             |
| Halorhodospira halophila SL1      | 9.50E-006 | BamB  | YP_001002863.1 | Pyrrolo-quinoline quinone                             |
| Halorhodospira halophila SL1      | 2.30E-077 | BamD  | YP_001003802.1 | putative lipoprotein                                  |
| Halorhodospira halophila SL1      | 1.50E-015 | BamD  | YP_001003934.1 | DNA uptake lipoprotein-like protein                   |
| Halorhodospira halophila SL1      | 9.70E-020 | BamE  | YP_001003051.1 | SmpA/OmlA domain-containing protein                   |
| Halorhodospira halophila SL1      | 8.60E-189 | Omp85 | YP_001003027.1 | surface antigen (D15)                                 |
| Halorhodospira halophila SL1      | 4.60E-008 | Omp85 | YP_001003535.1 | surface antigen (D15)                                 |
| Halotheiobacillus neapolitanus c2 | 1.60E-099 | BamB  | YP_003264060.1 | outer membrane assembly lipoprotein YfgL              |
| Halotheiobacillus neapolitanus c2 | 2.10E-007 | BamC  | YP_003262577.1 | lipoprotein                                           |
| Halotheiobacillus neapolitanus c2 | 7.90E-091 | BamD  | YP_003263903.1 | outer membrane assembly lipoprotein YfiO              |
| Halotheiobacillus neapolitanus c2 | 4.00E-012 | BamE  | YP_003262869.1 | SmpA/OmlA domain-containing protein                   |
| Halotheiobacillus neapolitanus c2 | 2.70E-196 | Omp85 | YP_003263325.1 | outer membrane protein assembly complex, YaeT protein |
| Halotheiobacillus neapolitanus c2 | 2.50E-006 | Omp85 | YP_003263622.1 | surface antigen (D15)                                 |
| Idiomarina loihiensis L2TR        | 9.70E-139 | BamB  | YP_156412.1    | outer membrane protein assembly complex subunit YfgL  |
| Idiomarina loihiensis L2TR        | 1.70E-005 | BamB  | YP_155179.1    | glucose dehydrogenase                                 |
| Idiomarina loihiensis L2TR        | 6.50E-018 | BamC  | YP_155848.1    | hypothetical protein IL1459                           |
| Idiomarina loihiensis L2TR        | 4.20E-132 | BamD  | YP_155573.1    | competence lipoprotein ComL                           |
| Idiomarina loihiensis L2TR        | 2.20E-037 | BamE  | YP_155379.1    | Outer membrane lipoprotein OmlA (small protein A)     |
| Idiomarina loihiensis L2TR        | 2.00E-188 | Omp85 | YP_155226.1    | surface antigen                                       |
| Idiomarina loihiensis L2TR        | 1.00E-006 | Omp85 | YP_156268.1    | outer membrane protein                                |
| Kangiella koreensis DSM 16069     | 1.40E-113 | BamB  | YP_003147015.1 | outer membrane assembly lipoprotein YfgL              |



## gamma\_e-5

|                                                    |           |       |                |                                                            |
|----------------------------------------------------|-----------|-------|----------------|------------------------------------------------------------|
| Kangiella koreensis DSM 16069                      | 1.30E-013 | BamC  | YP_003146806.1 | NlpBDapX family lipoprotein                                |
| Kangiella koreensis DSM 16069                      | 2.00E-105 | BamD  | YP_003146268.1 | outer membrane assembly lipoprotein YfiO                   |
| Kangiella koreensis DSM 16069                      | 2.20E-021 | BamE  | YP_003147623.1 | SmpA/OmlA domain-containing protein                        |
| Kangiella koreensis DSM 16069                      | 3.50E-156 | Omp85 | YP_003147082.1 | outer membrane protein assembly complex, YaeT protein      |
| Klebsiella pneumoniae 342                          | 6.70E-214 | BamB  | YP_002237138.1 | outer membrane protein assembly complex subunit YfgL       |
| Klebsiella pneumoniae 342                          | 4.60E-006 | BamB  | YP_002238229.1 | quinate dehydrogenase (pyrroloquinoline-quinone)           |
| Klebsiella pneumoniae 342                          | 4.80E-005 | BamB  | YP_002240396.1 | quinoprotein glucose dehydrogenase                         |
| Klebsiella pneumoniae 342                          | 8.40E-005 | BamB  | YP_002237959.1 | quinate/shikimate dehydrogenase (pyrroloquinoline-quinone) |
| Klebsiella pneumoniae 342                          | 1.80E-213 | BamC  | YP_002237185.1 | lipoprotein                                                |
| Klebsiella pneumoniae 342                          | 1.10E-169 | BamD  | YP_002237067.1 | outer membrane protein assembly complex subunit YfiO       |
| Klebsiella pneumoniae 342                          | 1.40E-066 | BamE  | YP_002237045.1 | hypothetical protein KPK_1181                              |
| Klebsiella pneumoniae 342                          | 2.60E-006 | BamE  | YP_002239039.1 | DNA-binding transcriptional activator OsmE                 |
| Klebsiella pneumoniae 342                          | 6.20E-005 | BamE  | YP_002240542.1 | lipoprotein                                                |
| Klebsiella pneumoniae 342                          | 0.00E+000 | Omp85 | YP_002240335.1 | outer membrane protein assembly factor YaeT                |
| Klebsiella pneumoniae 342                          | 2.00E-249 | Omp85 | YP_002240991.1 | outer membrane protein assembly factor YaeT                |
| Klebsiella pneumoniae 342                          | 2.80E-007 | Omp85 | YP_002240823.1 | outer membrane protein, OMP85 family                       |
| Klebsiella pneumoniae subsp. pneumoniae MGH 78578  | 6.20E-214 | BamB  | YP_001336482.1 | outer membrane protein assembly complex subunit YfgL       |
| Klebsiella pneumoniae subsp. pneumoniae MGH 78578  | 4.90E-006 | BamB  | YP_001335612.1 | glucose dehydrogenase                                      |
| Klebsiella pneumoniae subsp. pneumoniae MGH 78578  | 4.90E-005 | BamB  | YP_001333822.1 | glucose dehydrogenase                                      |
| Klebsiella pneumoniae subsp. pneumoniae MGH 78578  | 5.00E-212 | BamC  | YP_001336451.1 | lipoprotein                                                |
| Klebsiella pneumoniae subsp. pneumoniae MGH 78578  | 1.10E-169 | BamD  | YP_001336554.1 | outer membrane protein assembly complex subunit YfiO       |
| Klebsiella pneumoniae subsp. pneumoniae MGH 78578  | 7.90E-067 | BamE  | YP_001336575.1 | hypothetical protein KPN_02939                             |
| Klebsiella pneumoniae subsp. pneumoniae MGH 78578  | 5.30E-006 | BamE  | YP_001334892.1 | DNA-binding transcriptional activator OsmE                 |
| Klebsiella pneumoniae subsp. pneumoniae MGH 78578  | 0.00E+000 | Omp85 | YP_001333880.1 | outer membrane protein assembly factor YaeT                |
| Klebsiella pneumoniae subsp. pneumoniae MGH 78578  | 1.40E-253 | Omp85 | YP_001338074.1 | outer membrane protein assembly factor YaeT                |
| Klebsiella pneumoniae subsp. pneumoniae MGH 78578  | 2.30E-007 | Omp85 | YP_001338234.1 | putative outer membrane protein                            |
| Klebsiella pneumoniae subsp. pneumoniae NTUH-K2044 | 2.00E-214 | BamB  | YP_002920703.1 | outer membrane protein assembly complex subunit YfgL       |
| Klebsiella pneumoniae subsp. pneumoniae NTUH-K2044 | 8.40E-006 | BamB  | YP_002919726.1 | glucose dehydrogenase                                      |
| Klebsiella pneumoniae subsp. pneumoniae NTUH-K2044 | 4.90E-005 | BamB  | YP_002917845.1 | glucose dehydrogenase                                      |
| Klebsiella pneumoniae subsp. pneumoniae NTUH-K2044 | 8.00E-005 | BamB  | YP_002918293.1 | putative periplasmic protein                               |
| Klebsiella pneumoniae subsp. pneumoniae NTUH-K2044 | 2.50E-211 | BamC  | YP_002920673.1 | lipoprotein                                                |
| Klebsiella pneumoniae subsp. pneumoniae NTUH-K2044 | 1.10E-169 | BamD  | YP_002920777.1 | outer membrane protein assembly complex subunit YfiO       |
| Klebsiella pneumoniae subsp. pneumoniae NTUH-K2044 | 7.90E-067 | BamE  | YP_002920798.1 | hypothetical protein KP1_4195                              |
| Klebsiella pneumoniae subsp. pneumoniae NTUH-K2044 | 5.30E-006 | BamE  | YP_002919018.1 | DNA-binding transcriptional activator OsmE                 |
| Klebsiella pneumoniae subsp. pneumoniae NTUH-K2044 | 0.00E+000 | Omp85 | YP_002917907.1 | outer membrane protein assembly factor YaeT                |
| Klebsiella pneumoniae subsp. pneumoniae NTUH-K2044 | 2.30E-253 | Omp85 | YP_002917274.1 | outer membrane protein assembly factor YaeT                |
| Klebsiella pneumoniae subsp. pneumoniae NTUH-K2044 | 2.50E-007 | Omp85 | YP_002917433.1 | putative outer membrane protein                            |
| Klebsiella variicola At-22                         | 6.70E-214 | BamB  | YP_003438156.1 | outer membrane assembly lipoprotein YfgL                   |

## gamma\_e-5

|                                                               |           |       |                |                                                                                                                  |
|---------------------------------------------------------------|-----------|-------|----------------|------------------------------------------------------------------------------------------------------------------|
| Klebsiella variicola At-22                                    | 4.10E-006 | BamB  | YP_003439276.1 | membrane-bound glucose/quinolate/shikimate family PQQ-dependent dehydrogenase,                                   |
| Klebsiella variicola At-22                                    | 6.40E-005 | BamB  | YP_003441159.1 | membrane-bound glucose/quinolate/shikimate family PQQ-dependent dehydrogenase,                                   |
| Klebsiella variicola At-22                                    | 7.00E-005 | BamB  | YP_003438927.1 | membrane-bound glucose/quinolate/shikimate family PQQ-dependent dehydrogenase,                                   |
| Klebsiella variicola At-22                                    | 1.80E-213 | BamC  | YP_003438183.1 | NlpBDapX family lipoprotein                                                                                      |
| Klebsiella variicola At-22                                    | 1.00E-168 | BamD  | YP_003438088.1 | outer membrane assembly lipoprotein YfiO                                                                         |
| Klebsiella variicola At-22                                    | 1.40E-066 | BamE  | YP_003438067.1 | SmpA/OmlA domain-containing protein                                                                              |
| Klebsiella variicola At-22                                    | 2.60E-006 | BamE  | YP_003440002.1 | SmpA/OmlA domain-containing protein                                                                              |
| Klebsiella variicola At-22                                    | 0.00E+000 | Omp85 | YP_003441100.1 | outer membrane protein assembly complex, YaeT protein                                                            |
| Klebsiella variicola At-22                                    | 1.00E-251 | Omp85 | YP_003441700.1 | outer membrane protein assembly complex, YaeT protein                                                            |
| Klebsiella variicola At-22                                    | 2.60E-007 | Omp85 | YP_003441537.1 | surface antigen (D15)                                                                                            |
| Legionella longbeachae NSW150                                 | 4.40E-090 | BamB  | YP_003455006.1 | PQQ (pyrrolo-quinoline quinone) enzyme repeat protein                                                            |
| Legionella longbeachae NSW150                                 | 9.70E-077 | BamD  | YP_003454771.1 | competence lipoprotein comL precursor                                                                            |
| Legionella longbeachae NSW150                                 | 2.00E-015 | BamE  | YP_003454012.1 | small protein A, tmRNA-binding                                                                                   |
| Legionella longbeachae NSW150                                 | 3.10E-301 | Omp85 | YP_003456150.1 | outer membrane protein assembly factor<br>PQQ (pyrrolo quinoline) WD40-like repeat, enzyme repeat domain protein |
| Legionella pneumophila 2300/99 Alcoy                          | 8.90E-073 | BamB  | YP_003618824.1 |                                                                                                                  |
| Legionella pneumophila 2300/99 Alcoy                          | 9.10E-080 | BamD  | YP_003618517.1 | DNA uptake lipoprotein                                                                                           |
| Legionella pneumophila 2300/99 Alcoy                          | 6.90E-016 | BamE  | YP_003617620.1 | small protein A                                                                                                  |
| Legionella pneumophila 2300/99 Alcoy                          | 0.00E+000 | Omp85 | YP_003617755.1 | Outer membrane protein/protective antigen OMA87                                                                  |
| Legionella pneumophila str. Corby                             | 8.90E-073 | BamB  | YP_001250283.1 | PQQ (pyrrolo quinoline) WD40-like protein                                                                        |
| Legionella pneumophila str. Corby                             | 9.10E-080 | BamD  | YP_001249979.1 | competence lipoprotein ComL                                                                                      |
| Legionella pneumophila str. Corby                             | 6.90E-016 | BamE  | YP_001252220.1 | tmRNA-binding small protein A                                                                                    |
| Legionella pneumophila str. Corby                             | 0.00E+000 | Omp85 | YP_001252086.1 | outer membrane protein                                                                                           |
| Legionella pneumophila str. Lens                              | 1.70E-079 | BamB  | YP_126830.1    | hypothetical protein lpl1484                                                                                     |
| Legionella pneumophila str. Lens                              | 3.10E-080 | BamD  | YP_126545.1    | hypothetical protein lpl1194                                                                                     |
| Legionella pneumophila str. Lens                              | 5.10E-014 | BamE  | YP_125779.1    | hypothetical protein lpl0413                                                                                     |
| Legionella pneumophila str. Lens                              | 0.00E+000 | Omp85 | YP_125911.1    | hypothetical protein lpl0545                                                                                     |
| Legionella pneumophila str. Paris                             | 5.20E-081 | BamB  | YP_123823.1    | hypothetical protein lpp1499                                                                                     |
| Legionella pneumophila str. Paris                             | 3.10E-080 | BamD  | YP_123512.1    | hypothetical protein lpp1188                                                                                     |
| Legionella pneumophila str. Paris                             | 5.10E-014 | BamE  | YP_122777.1    | hypothetical protein lpp0437                                                                                     |
| Legionella pneumophila str. Paris                             | 0.00E+000 | Omp85 | YP_122907.1    | hypothetical protein lpp0569                                                                                     |
| Legionella pneumophila subsp. pneumophila str. Philadelphia 1 | 2.00E-078 | BamB  | YP_095571.1    | PQQ WD-40-like repeat-containing protein                                                                         |
| Legionella pneumophila subsp. pneumophila str. Philadelphia 1 | 9.10E-080 | BamD  | YP_095218.1    | competence lipoprotein ComL                                                                                      |
| Legionella pneumophila subsp. pneumophila str. Philadelphia 1 | 2.30E-015 | BamE  | YP_094416.1    | small protein A, tmRNA-binding                                                                                   |
| Legionella pneumophila subsp. pneumophila str. Philadelphia 1 | 0.00E+000 | Omp85 | YP_094550.1    | outer membrane protein                                                                                           |
| Mannheimia succiniciproducens MBEL55E                         | 1.40E-015 | BamC  | YP_087459.1    | NlpB protein                                                                                                     |
| Mannheimia succiniciproducens MBEL55E                         | 1.30E-144 | BamD  | YP_089012.1    | NrfG protein                                                                                                     |

## gamma\_e-5

|                                       |           |       |                |                                                       |
|---------------------------------------|-----------|-------|----------------|-------------------------------------------------------|
| Mannheimia succiniciproducens MBEL55E | 6.50E-005 | BamD  | YP_088323.1    | TolC protein                                          |
| Mannheimia succiniciproducens MBEL55E | 9.30E-005 | BamD  | YP_088665.1    | tetratricopeptide repeat protein                      |
| Mannheimia succiniciproducens MBEL55E | 4.30E-055 | BamE  | YP_089104.1    | SmpA protein                                          |
| Mannheimia succiniciproducens MBEL55E | 4.70E-178 | Omp85 | YP_089116.1    | hypothetical protein MS1924                           |
| Mannheimia succiniciproducens MBEL55E | 1.60E-006 | Omp85 | YP_087477.1    | hypothetical protein MS0285                           |
| Marinobacter aquaeolei VT8            | 4.30E-119 | BamB  | YP_958409.1    | Pyrrolo-quinoline quinone                             |
| Marinobacter aquaeolei VT8            | 1.00E-005 | BamC  | YP_958961.1    | hypothetical protein Maqu_1690                        |
| Marinobacter aquaeolei VT8            | 4.00E-095 | BamD  | YP_958160.1    | DNA uptake lipoprotein                                |
| Marinobacter aquaeolei VT8            | 4.20E-011 | BamE  | YP_960624.1    | SmpA/OmlA domain-containing protein                   |
| Marinobacter aquaeolei VT8            | 6.60E-007 | BamE  | YP_961077.1    | hypothetical protein Maqu_3821                        |
| Marinobacter aquaeolei VT8            | 1.90E-200 | Omp85 | YP_959802.1    | surface antigen (D15)                                 |
| Marinobacter aquaeolei VT8            | 7.50E-007 | Omp85 | YP_959280.1    | surface antigen (D15)                                 |
| Marinomonas mediterranea MMB-1        | 4.90E-049 | BamB  | YP_004312337.1 | outer membrane assembly lipoprotein YfgL              |
| Marinomonas mediterranea MMB-1        | 2.00E-071 | BamD  | YP_004314034.1 | outer membrane assembly lipoprotein YfiO              |
| Marinomonas mediterranea MMB-1        | 1.80E-014 | BamE  | YP_004311694.1 | SmpA/OmlA domain-containing protein                   |
| Marinomonas mediterranea MMB-1        | 1.00E-177 | Omp85 | YP_004312263.1 | outer membrane protein assembly complex, YaeT protein |
| Marinomonas posidonica IVIA-Po-181    | 4.10E-067 | BamB  | YP_004482394.1 | outer membrane assembly lipoprotein YfgL              |
| Marinomonas posidonica IVIA-Po-181    | 2.70E-073 | BamD  | YP_004480666.1 | outer membrane assembly lipoprotein YfiO              |
| Marinomonas posidonica IVIA-Po-181    | 1.10E-020 | BamE  | YP_004480342.1 | SmpA/OmlA domain-containing protein                   |
| Marinomonas posidonica IVIA-Po-181    | 9.50E-176 | Omp85 | YP_004482572.1 | outer membrane protein assembly complex, YaeT protein |
| Marinomonas sp. MWYL1                 | 2.00E-057 | BamB  | YP_001340223.1 | Pyrrolo-quinoline quinone                             |
| Marinomonas sp. MWYL1                 | 1.40E-005 | BamB  | YP_001339858.1 | Pyrrolo-quinoline quinone                             |
| Marinomonas sp. MWYL1                 | 5.70E-070 | BamD  | YP_001342449.1 | competence lipoprotein ComL                           |
| Marinomonas sp. MWYL1                 | 8.40E-016 | BamE  | YP_001342800.1 | SmpA/OmlA domain-containing protein                   |
| Marinomonas sp. MWYL1                 | 6.50E-177 | Omp85 | YP_001340144.1 | surface antigen (D15)                                 |
| Methylococcus capsulatus str. Bath    | 9.50E-112 | BamB  | YP_115284.1    | putative lipoprotein                                  |
| Methylococcus capsulatus str. Bath    | 4.80E-006 | BamB  | YP_113281.1    | methanol dehydrogenase protein, large subunit         |
| Methylococcus capsulatus str. Bath    | 9.20E-006 | BamB  | YP_112833.1    | methanol dehydrogenase protein, large subunit         |
| Methylococcus capsulatus str. Bath    | 1.60E-166 | BamD  | YP_113450.1    | competence lipoprotein ComL                           |
| Methylococcus capsulatus str. Bath    | 4.10E-005 | BamD  | YP_113695.1    | hypothetical protein MCA1231                          |
| Methylococcus capsulatus str. Bath    | 6.00E-023 | BamE  | YP_115026.1    | small protein A                                       |
| Methylococcus capsulatus str. Bath    | 1.80E-208 | Omp85 | YP_114861.1    | OMP85 family outer membrane protein                   |
| Methylomonas methanica MC09           | 1.60E-115 | BamB  | YP_004514798.1 | outer membrane assembly lipoprotein YfgL              |
| Methylomonas methanica MC09           | 3.50E-006 | BamB  | YP_004512440.1 | PQQ-dependent dehydrogenase                           |
| Methylomonas methanica MC09           | 1.30E-005 | BamB  | YP_004515165.1 | PQQ-dependent dehydrogenase                           |
| Methylomonas methanica MC09           | 5.20E-121 | BamD  | YP_004515268.1 | outer membrane assembly lipoprotein YfiO              |
| Methylomonas methanica MC09           | 5.70E-005 | BamD  | YP_004512418.1 | tol-pal system protein YbgF                           |
| Methylomonas methanica MC09           | 5.20E-024 | BamE  | YP_004513140.1 | SmpA/OmlA domain-containing protein                   |

## gamma\_e-5

|                                 |           |       |                |                                                                                |
|---------------------------------|-----------|-------|----------------|--------------------------------------------------------------------------------|
| Methylomonas methanica MC09     | 3.40E-006 | BamE  | YP_004515290.1 | hypothetical protein Metme_4448                                                |
| Methylomonas methanica MC09     | 5.20E-006 | BamE  | YP_004511281.1 | hypothetical protein Metme_0334                                                |
| Methylomonas methanica MC09     | 5.20E-200 | Omp85 | YP_004513527.1 | outer membrane protein assembly complex, YaeT protein                          |
| Methylomonas methanica MC09     | 1.00E-007 | Omp85 | YP_004512822.1 | surface antigen (D15)                                                          |
| Moraxella catarrhalis RH4       | 1.20E-047 | BamB  | YP_003627325.1 | outer membrane assembly lipoprotein YfgL                                       |
| Moraxella catarrhalis RH4       | 2.30E-052 | BamD  | YP_003627211.1 | DNA uptake lipoprotein-like protein                                            |
| Moraxella catarrhalis RH4       | 2.30E-022 | BamE  | YP_003626497.1 | SmpA/OmlA family protein                                                       |
| Moraxella catarrhalis RH4       | 1.80E-135 | Omp85 | YP_003626711.1 | outer membrane protein assembly complex protein YaeT                           |
| Moraxella catarrhalis RH4       | 1.70E-006 | Omp85 | YP_003627384.1 | D15 surface antigen family protein                                             |
| Nitrosococcus halophilus Nc4    | 1.70E-126 | BamB  | YP_003527940.1 | outer membrane assembly lipoprotein YfgL                                       |
| Nitrosococcus halophilus Nc4    | 5.20E-005 | BamC  | YP_003526219.1 | NlpB/DapX lipoprotein                                                          |
| Nitrosococcus halophilus Nc4    | 5.60E-115 | BamD  | YP_003526162.1 | outer membrane assembly lipoprotein YfiO                                       |
| Nitrosococcus halophilus Nc4    | 5.40E-006 | BamD  | YP_003525782.1 | tol-pal system protein YbgF                                                    |
| Nitrosococcus halophilus Nc4    | 2.60E-026 | BamE  | YP_003526446.1 | SmpA/OmlA domain-containing protein                                            |
| Nitrosococcus halophilus Nc4    | 3.00E-227 | Omp85 | YP_003527935.1 | outer membrane protein assembly complex, YaeT protein                          |
| Nitrosococcus halophilus Nc4    | 7.30E-007 | Omp85 | YP_003525807.1 | surface antigen (D15)                                                          |
| Nitrosococcus oceani ATCC 19707 | 8.20E-124 | BamB  | YP_342864.1    | Pyrrolo-quinoline quinone                                                      |
| Nitrosococcus oceani ATCC 19707 | 3.00E-005 | BamC  | YP_344506.1    | NlpB/DapX lipoprotein                                                          |
| Nitrosococcus oceani ATCC 19707 | 2.20E-107 | BamD  | YP_342760.1    | transmembrane protein                                                          |
| Nitrosococcus oceani ATCC 19707 | 1.20E-006 | BamD  | YP_342210.1    | TPR repeat-containing protein                                                  |
| Nitrosococcus oceani ATCC 19707 | 1.70E-026 | BamE  | YP_343227.1    | SmpA/OmlA                                                                      |
| Nitrosococcus oceani ATCC 19707 | 2.80E-221 | Omp85 | YP_342859.1    | Outer membrane protein                                                         |
| Nitrosococcus oceani ATCC 19707 | 2.30E-006 | Omp85 | YP_342426.1    | Outer membrane protein                                                         |
| Nitrosococcus watsonii C-113    | 2.10E-137 | BamB  | YP_003761438.1 | outer membrane assembly lipoprotein Yfgl                                       |
| Nitrosococcus watsonii C-113    | 5.40E-005 | BamB  | YP_003760519.1 | membrane-bound PQQ-dependent dehydrogenase, glucose/quinolate/shikimate family |
| Nitrosococcus watsonii C-113    | 6.60E-109 | BamD  | YP_003761539.1 | outer membrane assembly lipoprotein YfiO                                       |
| Nitrosococcus watsonii C-113    | 4.50E-007 | BamD  | YP_003759435.1 | tol-pal system protein YbgF                                                    |
| Nitrosococcus watsonii C-113    | 8.70E-025 | BamE  | YP_003761000.1 | SmpA/OmlA domain-containing protein                                            |
| Nitrosococcus watsonii C-113    | 5.10E-222 | Omp85 | YP_003761443.1 | outer membrane protein assembly complex protein YaeT                           |
| Nitrosococcus watsonii C-113    | 5.00E-006 | Omp85 | YP_003761820.1 | surface antigen                                                                |
| Pantoea ananatis LMG 20103      | 1.70E-198 | BamB  | YP_003521150.1 | YfgL                                                                           |
| Pantoea ananatis LMG 20103      | 5.80E-005 | BamB  | YP_003518607.1 | Gcd                                                                            |
| Pantoea ananatis LMG 20103      | 3.90E-138 | BamC  | YP_003521101.1 | NlpB                                                                           |
| Pantoea ananatis LMG 20103      | 7.20E-152 | BamD  | YP_003521308.1 | YfiO                                                                           |
| Pantoea ananatis LMG 20103      | 9.80E-052 | BamE  | YP_003521203.1 | SmpA                                                                           |
| Pantoea ananatis LMG 20103      | 7.60E-006 | BamE  | YP_003519980.1 | OsmE                                                                           |
| Pantoea ananatis LMG 20103      | 2.40E-005 | BamE  | YP_003520034.1 | SodC                                                                           |

## gamma\_e-5

|                                                  |           |       |                |                                                                                |
|--------------------------------------------------|-----------|-------|----------------|--------------------------------------------------------------------------------|
| Pantoea ananatis LMG 20103                       | 6.40E-005 | BamE  | YP_003522528.1 | hypothetical Protein PANA_4233                                                 |
| Pantoea ananatis LMG 20103                       | 7.70E-005 | BamE  | YP_003521835.1 | AmiB                                                                           |
| Pantoea ananatis LMG 20103                       | 0.00E+000 | Omp85 | YP_003519095.1 | YaeT                                                                           |
| Pantoea ananatis LMG 20103                       | 9.00E-007 | Omp85 | YP_003521807.1 | YtfM                                                                           |
| Pantoea sp. At-9b                                | 1.50E-198 | BamB  | YP_004116781.1 | outer membrane assembly lipoprotein YfgL                                       |
| Pantoea sp. At-9b                                | 1.20E-005 | BamB  | YP_004115705.1 | glucose/quininate/shikimate family membrane-bound PQQ-dependent dehydrogenase  |
| Pantoea sp. At-9b                                | 2.20E-005 | BamB  | YP_004118314.1 | membrane-bound PQQ-dependent dehydrogenase, glucose/quininate/shikimate family |
| Pantoea sp. At-9b                                | 3.50E-005 | BamB  | YP_004119134.1 | membrane-bound PQQ-dependent dehydrogenase, glucose/quininate/shikimate family |
| Pantoea sp. At-9b                                | 7.50E-005 | BamB  | YP_004118995.1 | membrane-bound PQQ-dependent dehydrogenase, glucose/quininate/shikimate family |
| Pantoea sp. At-9b                                | 5.50E-187 | BamC  | YP_004116735.1 | NlpBDapX family lipoprotein                                                    |
| Pantoea sp. At-9b                                | 4.00E-155 | BamD  | YP_004116898.1 | outer membrane assembly lipoprotein YfiO                                       |
| Pantoea sp. At-9b                                | 3.50E-005 | BamD  | YP_004115939.1 | tetratricopeptide repeat-containing protein                                    |
| Pantoea sp. At-9b                                | 4.10E-062 | BamE  | YP_004116843.1 | SmpA/OmlA domain-containing protein                                            |
| Pantoea sp. At-9b                                | 4.40E-007 | BamE  | YP_004115426.1 | hypothetical protein Pat9b_1553                                                |
| Pantoea sp. At-9b                                | 9.90E-006 | BamE  | YP_004115504.1 | SmpA/OmlA domain-containing protein                                            |
| Pantoea sp. At-9b                                | 0.00E+000 | Omp85 | YP_004114638.1 | outer membrane protein assembly complex, YaeT protein                          |
| Pantoea sp. At-9b                                | 1.30E-006 | Omp85 | YP_004117378.1 | surface antigen (D15)                                                          |
| Pantoea sp. At-9b                                | 4.10E-287 | Omp85 | YP_004117998.1 | outer membrane protein assembly complex, YaeT protein                          |
| Pantoea sp. At-9b                                | 1.90E-271 | Omp85 | YP_004119546.1 | outer membrane protein assembly complex, YaeT protein                          |
| Pantoea vagans C9-1                              | 6.40E-195 | BamB  | YP_003931898.1 | outer membrane protein yfgL                                                    |
| Pantoea vagans C9-1                              | 3.70E-005 | BamB  | YP_003930967.1 | glucose dehydrogenase                                                          |
| Pantoea vagans C9-1                              | 8.40E-005 | BamB  | YP_003933125.1 | hypothetical protein Pvag_3557                                                 |
| Pantoea vagans C9-1                              | 2.80E-188 | BamC  | YP_003931857.1 | lipoprotein 34 precursor nlpB                                                  |
| Pantoea vagans C9-1                              | 4.50E-155 | BamD  | YP_003931997.1 | UPF0169 lipoprotein yfiO precursor                                             |
| Pantoea vagans C9-1                              | 7.80E-064 | BamE  | YP_003931953.1 | Small protein A precursor                                                      |
| Pantoea vagans C9-1                              | 4.00E-007 | BamE  | YP_003930766.1 | Osmotically-inducible lipoprotein E precursor                                  |
| Pantoea vagans C9-1                              | 0.00E+000 | Omp85 | YP_003929879.1 | outer membrane protein assembly factor yaeT precursor                          |
| Pantoea vagans C9-1                              | 1.00E-006 | Omp85 | YP_003932375.1 | hypothetical protein Pvag_2767                                                 |
| Pasteurella multocida subsp. multocida str. Pm70 | 6.50E-018 | BamC  | NP_245987.1    | hypothetical protein PM1050                                                    |
| Pasteurella multocida subsp. multocida str. Pm70 | 3.80E-167 | BamD  | NP_246659.1    | hypothetical protein PM1720                                                    |
| Pasteurella multocida subsp. multocida str. Pm70 | 1.30E-052 | BamE  | NP_246825.1    | hypothetical protein PM1886                                                    |
| Pasteurella multocida subsp. multocida str. Pm70 | 9.20E-006 | BamE  | NP_245523.1    | Plp4                                                                           |
| Pasteurella multocida subsp. multocida str. Pm70 | 1.30E-179 | Omp85 | NP_246931.1    | hypothetical protein PM1992                                                    |
| Pasteurella multocida subsp. multocida str. Pm70 | 5.60E-006 | Omp85 | NP_246748.1    | hypothetical protein PM1809                                                    |
| Pectobacterium atrosepticum SCRI1043             | 6.20E-198 | BamB  | YP_051306.1    | outer membrane protein assembly complex subunit YfgL                           |
| Pectobacterium atrosepticum SCRI1043             | 5.30E-005 | BamB  | YP_048911.1    | putative outer membrane protein                                                |

## gamma\_e-5

|                                                        |           |       |                |                                                       |
|--------------------------------------------------------|-----------|-------|----------------|-------------------------------------------------------|
| Pectobacterium atrosepticum SCRI1043                   | 8.60E-208 | BamC  | YP_049369.1    | lipoprotein                                           |
| Pectobacterium atrosepticum SCRI1043                   | 2.00E-152 | BamD  | YP_051437.1    | outer membrane protein assembly complex subunit YfiO  |
| Pectobacterium atrosepticum SCRI1043                   | 4.30E-067 | BamE  | YP_048949.1    | hypothetical protein ECA0839                          |
| Pectobacterium atrosepticum SCRI1043                   | 5.60E-006 | BamE  | YP_050506.1    | DNA-binding transcriptional activator OsmE            |
| Pectobacterium atrosepticum SCRI1043                   | 2.90E-306 | Omp85 | YP_049146.1    | outer membrane protein assembly factor YaeT           |
| Pectobacterium atrosepticum SCRI1043                   | 3.90E-007 | Omp85 | YP_051684.1    | hypothetical protein ECA3596                          |
| Pectobacterium carotovorum subsp. carotovorum PC1      | 2.10E-195 | BamB  | YP_003018570.1 | outer membrane assembly lipoprotein YfgL              |
| Pectobacterium carotovorum subsp. carotovorum PC1      | 2.80E-005 | BamB  | YP_003016268.1 | Ig family protein                                     |
| Pectobacterium carotovorum subsp. carotovorum PC1      | 1.50E-208 | BamC  | YP_003016724.1 | NlpBDapX family lipoprotein                           |
| Pectobacterium carotovorum subsp. carotovorum PC1      | 8.00E-153 | BamD  | YP_003018703.1 | outer membrane assembly lipoprotein YfiO              |
| Pectobacterium carotovorum subsp. carotovorum PC1      | 4.30E-067 | BamE  | YP_003016317.1 | SmpA/OmlA domain-containing protein                   |
| Pectobacterium carotovorum subsp. carotovorum PC1      | 7.80E-006 | BamE  | YP_003017185.1 | hypothetical protein PC1_1608                         |
| Pectobacterium carotovorum subsp. carotovorum PC1      | 1.70E-005 | BamE  | YP_003017476.1 | SmpA/OmlA domain-containing protein                   |
| Pectobacterium carotovorum subsp. carotovorum PC1      | 0.00E+000 | Omp85 | YP_003016535.1 | outer membrane protein assembly complex, YaeT protein |
| Pectobacterium carotovorum subsp. carotovorum PC1      | 1.80E-006 | Omp85 | YP_003018968.1 | surface antigen (D15)                                 |
| Pectobacterium wasabiae WPP163                         | 1.20E-198 | BamB  | YP_003258682.1 | outer membrane protein assembly complex subunit YfgL  |
| Pectobacterium wasabiae WPP163                         | 5.00E-205 | BamC  | YP_003260527.1 | lipoprotein                                           |
| Pectobacterium wasabiae WPP163                         | 3.00E-152 | BamD  | YP_003258556.1 | outer membrane protein assembly complex subunit YfiO  |
| Pectobacterium wasabiae WPP163                         | 1.00E-066 | BamE  | YP_003258386.1 | hypothetical protein Pecwa_0962                       |
| Pectobacterium wasabiae WPP163                         | 7.20E-006 | BamE  | YP_003259101.1 | hypothetical protein Pecwa_1707                       |
| Pectobacterium wasabiae WPP163                         | 6.80E-005 | BamE  | YP_003259569.1 | DNA-binding transcriptional activator OsmE            |
| Pectobacterium wasabiae WPP163                         | 1.30E-306 | Omp85 | YP_003260697.1 | outer membrane protein assembly factor YaeT           |
| Pectobacterium wasabiae WPP163                         | 8.70E-007 | Omp85 | YP_003260918.1 | surface antigen (D15)                                 |
| Photobacterium profundum SS9                           | 2.30E-154 | BamB  | YP_128981.1    | outer membrane protein assembly complex subunit YfgL  |
| Photobacterium profundum SS9                           | 3.10E-219 | BamC  | YP_131042.1    | lipoprotein                                           |
| Photobacterium profundum SS9                           | 9.50E-164 | BamD  | YP_131152.1    | hypothetical protein PBPRA3022                        |
| Photobacterium profundum SS9                           | 4.10E-005 | BamD  | YP_132273.1    | hypothetical protein PBPRB0600                        |
| Photobacterium profundum SS9                           | 4.20E-072 | BamE  | YP_128916.1    | hypothetical protein PBPRA0693                        |
| Photobacterium profundum SS9                           | 1.00E-222 | Omp85 | YP_131096.1    | outer membrane protein assembly factor YaeT           |
| Photobacterium profundum SS9                           | 6.50E-007 | Omp85 | YP_128613.1    | hypothetical protein PBPRA0379                        |
| Photorhabdus asymbiotica subsp. asymbiotica ATCC 43949 | 2.30E-171 | BamB  | YP_003040226.1 | outer membrane protein assembly complex subunit YfgL  |
| Photorhabdus asymbiotica subsp. asymbiotica ATCC 43949 | 1.10E-219 | BamC  | YP_003040633.1 | lipoprotein                                           |
| Photorhabdus asymbiotica subsp. asymbiotica ATCC 43949 | 3.90E-144 | BamD  | YP_003042023.1 | outer membrane protein assembly complex subunit YfiO  |
| Photorhabdus asymbiotica subsp. asymbiotica ATCC 43949 | 4.80E-005 | BamD  | YP_003040917.1 | tetratricopeptide repeat-containing protein           |
| Photorhabdus asymbiotica subsp. asymbiotica ATCC 43949 | 9.30E-062 | BamE  | YP_003040109.1 | hypothetical protein PAU_01272                        |
| Photorhabdus asymbiotica subsp. asymbiotica ATCC 43949 | 5.30E-305 | Omp85 | YP_003039489.1 | outer membrane protein assembly factor YaeT           |
| Photorhabdus asymbiotica subsp. asymbiotica ATCC 43949 | 1.40E-006 | Omp85 | YP_003042884.1 | hypothetical protein PAU_04055                        |
| Photorhabdus luminescens subsp. laumondii TTO1         | 4.80E-172 | BamB  | NP_928679.1    | outer membrane protein assembly complex subunit YfgL  |

## gamma\_e-5

|                                                |           |       |                |                                                      |
|------------------------------------------------|-----------|-------|----------------|------------------------------------------------------|
| Photorhabdus luminescens subsp. laumondii TTO1 | 7.50E-243 | BamC  | NP_929979.1    | lipoprotein                                          |
| Photorhabdus luminescens subsp. laumondii TTO1 | 2.20E-136 | BamD  | NP_928578.1    | outer membrane protein assembly complex subunit YfiO |
| Photorhabdus luminescens subsp. laumondii TTO1 | 3.50E-062 | BamE  | NP_930593.1    | hypothetical protein plu3375                         |
| Photorhabdus luminescens subsp. laumondii TTO1 | 8.80E-005 | BamE  | NP_931467.1    | hypothetical protein plu4291                         |
| Photorhabdus luminescens subsp. laumondii TTO1 | 3.00E-303 | Omp85 | NP_928025.1    | outer membrane protein assembly factor YaeT          |
| Photorhabdus luminescens subsp. laumondii TTO1 | 8.30E-007 | Omp85 | NP_931718.1    | hypothetical protein plu4554                         |
| Proteus mirabilis HI4320                       | 8.30E-167 | BamB  | YP_002151569.1 | outer membrane protein assembly complex subunit YfgL |
| Proteus mirabilis HI4320                       | 1.10E-170 | BamC  | YP_002151294.1 | lipoprotein                                          |
| Proteus mirabilis HI4320                       | 4.40E-147 | BamD  | YP_002150164.1 | outer membrane protein assembly complex subunit YfiO |
| Proteus mirabilis HI4320                       | 1.00E-053 | BamE  | YP_002151630.1 | hypothetical protein PMI1903                         |
| Proteus mirabilis HI4320                       | 2.80E-294 | Omp85 | YP_002151995.1 | outer membrane protein assembly factor YaeT          |
| Proteus mirabilis HI4320                       | 1.60E-006 | Omp85 | YP_002153074.1 | cell surface protein                                 |
| Pseudoalteromonas atlantica T6c                | 3.40E-131 | BamB  | YP_662683.1    | outer membrane protein assembly complex subunit YfgL |
| Pseudoalteromonas atlantica T6c                | 7.20E-008 | BamB  | YP_661429.1    | Pyrrolo-quinoline quinone                            |
| Pseudoalteromonas atlantica T6c                | 2.50E-057 | BamC  | YP_662047.1    | NlpBDapX lipoprotein                                 |
| Pseudoalteromonas atlantica T6c                | 7.40E-138 | BamD  | YP_660914.1    | putative lipoprotein                                 |
| Pseudoalteromonas atlantica T6c                | 8.70E-005 | BamD  | YP_662499.1    | hypothetical protein PatI_2937                       |
| Pseudoalteromonas atlantica T6c                | 4.40E-040 | BamE  | YP_661288.1    | SmpA/OmlA                                            |
| Pseudoalteromonas atlantica T6c                | 7.50E-179 | Omp85 | YP_660837.1    | surface antigen (D15)                                |
| Pseudoalteromonas atlantica T6c                | 7.70E-006 | Omp85 | YP_659846.1    | surface antigen (D15)                                |
| Pseudoalteromonas haloplanktis TAC125          | 8.90E-136 | BamB  | YP_341628.2    | outer membrane protein assembly complex subunit YfgL |
| Pseudoalteromonas haloplanktis TAC125          | 1.80E-019 | BamC  | YP_339643.1    | lipoprotein-34 NlpB                                  |
| Pseudoalteromonas haloplanktis TAC125          | 3.90E-101 | BamD  | YP_339454.1    | hypothetical protein PSHAA0932                       |
| Pseudoalteromonas haloplanktis TAC125          | 5.80E-005 | BamD  | YP_341439.1    | hypothetical protein PSHAA2962                       |
| Pseudoalteromonas haloplanktis TAC125          | 2.30E-044 | BamE  | YP_339368.1    | small protein A , precursor] (smpA)                  |
| Pseudoalteromonas haloplanktis TAC125          | 7.40E-167 | Omp85 | YP_340527.1    | outer membrane protein assembly factor               |
| Pseudoalteromonas haloplanktis TAC125          | 6.30E-006 | Omp85 | YP_340482.1    | hypothetical protein PSHAA1983                       |
| Pseudoalteromonas sp. SM9913                   | 6.20E-136 | BamB  | YP_004065119.1 | outer membrane protein assembly complex subunit YfgL |
| Pseudoalteromonas sp. SM9913                   | 4.90E-023 | BamC  | YP_004068977.1 | lipoprotein-34 NlpB                                  |
| Pseudoalteromonas sp. SM9913                   | 1.70E-102 | BamD  | YP_004068101.1 | hypothetical protein PSM_A1005                       |
| Pseudoalteromonas sp. SM9913                   | 2.70E-042 | BamE  | YP_004069269.1 | small protein A                                      |
| Pseudoalteromonas sp. SM9913                   | 4.50E-172 | Omp85 | YP_004069159.1 | outer membrane protein assembly factor               |
| Pseudoalteromonas sp. SM9913                   | 7.50E-006 | Omp85 | YP_004069099.1 | outer membrane protein                               |
| Pseudomonas aeruginosa LESB58                  | 4.00E-177 | BamB  | YP_002438780.1 | hypothetical protein PLES_11741                      |
| Pseudomonas aeruginosa LESB58                  | 3.40E-008 | BamB  | YP_002440926.1 | quinoprotein alcohol dehydrogenase                   |
| Pseudomonas aeruginosa LESB58                  | 2.50E-005 | BamB  | YP_002440603.1 | glucose dehydrogenase                                |
| Pseudomonas aeruginosa LESB58                  | 1.90E-147 | BamD  | YP_002442509.1 | competence protein ComL                              |
| Pseudomonas aeruginosa LESB58                  | 5.50E-005 | BamD  | YP_002441924.1 | hypothetical protein PLES_43401                      |

## gamma\_e-5

|                                   |           |       |                |                                                       |
|-----------------------------------|-----------|-------|----------------|-------------------------------------------------------|
| Pseudomonas aeruginosa LESB58     | 9.30E-005 | BamD  | YP_002443475.1 | putative lipoprotein                                  |
| Pseudomonas aeruginosa LESB58     | 1.10E-025 | BamE  | YP_002442729.1 | Outer membrane lipoprotein OmlA precursor             |
| Pseudomonas aeruginosa LESB58     | 2.30E-006 | BamE  | YP_002442840.1 | DNA-binding transcriptional activator OsmE            |
| Pseudomonas aeruginosa LESB58     | 5.40E-005 | BamE  | YP_002443076.1 | putative lipoprotein                                  |
| Pseudomonas aeruginosa LESB58     | 4.40E-205 | Omp85 | YP_002438991.1 | putative outer membrane protein precursor             |
| Pseudomonas aeruginosa LESB58     | 1.20E-006 | Omp85 | YP_002440345.1 | putative outer membrane protein                       |
| Pseudomonas aeruginosa PA7        | 5.30E-177 | BamB  | YP_001346698.1 | hypothetical protein PSPA7_1314                       |
| Pseudomonas aeruginosa PA7        | 2.70E-008 | BamB  | YP_001348672.1 | quinoprotein alcohol dehydrogenase                    |
| Pseudomonas aeruginosa PA7        | 1.10E-005 | BamB  | YP_001348471.1 | quinoprotein glucose dehydrogenase                    |
| Pseudomonas aeruginosa PA7        | 8.10E-005 | BamB  | YP_001348311.1 | glucose dehydrogenase                                 |
| Pseudomonas aeruginosa PA7        | 1.60E-146 | BamD  | YP_001350516.1 | competence protein ComL                               |
| Pseudomonas aeruginosa PA7        | 6.40E-005 | BamD  | YP_001349883.1 | TPR repeat-containing protein                         |
| Pseudomonas aeruginosa PA7        | 1.20E-025 | BamE  | YP_001350807.1 | outer membrane lipoprotein OmlA                       |
| Pseudomonas aeruginosa PA7        | 3.30E-006 | BamE  | YP_001350919.1 | DNA-binding transcriptional activator OsmE            |
| Pseudomonas aeruginosa PA7        | 3.00E-005 | BamE  | YP_001351160.1 | putative lipoprotein                                  |
| Pseudomonas aeruginosa PA7        | 7.10E-205 | Omp85 | YP_001346875.1 | outer membrane protein assembly complex, YaeT protein |
| Pseudomonas aeruginosa PA7        | 1.50E-006 | Omp85 | YP_001348054.1 | hypothetical protein PSPA7_2694                       |
| Pseudomonas aeruginosa PAO1       | 4.00E-177 | BamB  | NP_252489.1    | hypothetical protein PA3800                           |
| Pseudomonas aeruginosa PAO1       | 2.20E-008 | BamB  | NP_250672.1    | quinoprotein ethanol dehydrogenase                    |
| Pseudomonas aeruginosa PAO1       | 3.30E-005 | BamB  | NP_250980.1    | glucose dehydrogenase                                 |
| Pseudomonas aeruginosa PAO1       | 1.90E-147 | BamD  | NP_253235.1    | competence protein ComL                               |
| Pseudomonas aeruginosa PAO1       | 3.50E-005 | BamD  | NP_249665.1    | hypothetical protein PA0974                           |
| Pseudomonas aeruginosa PAO1       | 8.50E-005 | BamD  | NP_254189.1    | hypothetical protein PA5502                           |
| Pseudomonas aeruginosa PAO1       | 1.10E-025 | BamE  | NP_253453.1    | Outer membrane lipoprotein OmlA precursor             |
| Pseudomonas aeruginosa PAO1       | 2.30E-006 | BamE  | NP_253563.1    | OsmE family transcriptional regulator                 |
| Pseudomonas aeruginosa PAO1       | 5.40E-005 | BamE  | NP_253795.1    | hypothetical protein PA5108                           |
| Pseudomonas aeruginosa PAO1       | 2.40E-205 | Omp85 | NP_252338.1    | outer membrane protein Opr86                          |
| Pseudomonas aeruginosa PAO1       | 1.20E-006 | Omp85 | NP_251233.1    | hypothetical protein PA2543                           |
| Pseudomonas aeruginosa UCBPP-PA14 | 4.80E-177 | BamB  | YP_789332.1    | hypothetical protein PA14_14910                       |
| Pseudomonas aeruginosa UCBPP-PA14 | 2.20E-008 | BamB  | YP_791257.1    | quinoprotein alcohol dehydrogenase                    |
| Pseudomonas aeruginosa UCBPP-PA14 | 3.10E-005 | BamB  | YP_790946.1    | glucose dehydrogenase                                 |
| Pseudomonas aeruginosa UCBPP-PA14 | 1.90E-147 | BamD  | YP_793006.1    | competence protein ComL                               |
| Pseudomonas aeruginosa UCBPP-PA14 | 3.50E-005 | BamD  | YP_792300.1    | hypothetical protein PA14_51690                       |
| Pseudomonas aeruginosa UCBPP-PA14 | 8.50E-005 | BamD  | YP_793979.1    | putative lipoprotein                                  |
| Pseudomonas aeruginosa UCBPP-PA14 | 1.10E-025 | BamE  | YP_793229.1    | outer membrane lipoprotein OmlA precursor             |
| Pseudomonas aeruginosa UCBPP-PA14 | 2.30E-006 | BamE  | YP_793344.1    | DNA-binding transcriptional activator OsmE            |
| Pseudomonas aeruginosa UCBPP-PA14 | 5.40E-005 | BamE  | YP_793578.1    | putative lipoprotein                                  |
| Pseudomonas aeruginosa UCBPP-PA14 | 6.60E-207 | Omp85 | YP_789516.1    | putative outer membrane antigen                       |



## gamma\_e-5

|                                                                       |           |       |                |                                                       |
|-----------------------------------------------------------------------|-----------|-------|----------------|-------------------------------------------------------|
| <i>Pseudomonas aeruginosa</i> UCBPP-PA14                              | 1.20E-006 | Omp85 | YP_790694.1    | hypothetical protein PA14_31680                       |
| <i>Pseudomonas brassicacearum</i> subsp. <i>brassicacearum</i> NFM421 | 1.50E-198 | BamB  | YP_004352112.1 | hypothetical protein PSEBR_a939                       |
| <i>Pseudomonas brassicacearum</i> subsp. <i>brassicacearum</i> NFM421 | 3.10E-009 | BamB  | YP_004353962.1 | alcohol dehydrogenase                                 |
| <i>Pseudomonas brassicacearum</i> subsp. <i>brassicacearum</i> NFM421 | 3.40E-008 | BamB  | YP_004353957.1 | quinoprotein ethanol dehydrogenase                    |
| <i>Pseudomonas brassicacearum</i> subsp. <i>brassicacearum</i> NFM421 | 4.40E-005 | BamB  | YP_004355949.1 | Quinoprotein glucose dehydrogenase                    |
| <i>Pseudomonas brassicacearum</i> subsp. <i>brassicacearum</i> NFM421 | 3.50E-005 | BamC  | YP_004352541.1 | lipoprotein                                           |
| <i>Pseudomonas brassicacearum</i> subsp. <i>brassicacearum</i> NFM421 | 1.90E-146 | BamD  | YP_004356266.1 | DNA uptake lipoprotein ComL                           |
| <i>Pseudomonas brassicacearum</i> subsp. <i>brassicacearum</i> NFM421 | 4.50E-026 | BamE  | YP_004351926.1 | outer membrane lipoprotein                            |
| <i>Pseudomonas brassicacearum</i> subsp. <i>brassicacearum</i> NFM421 | 9.70E-005 | BamE  | YP_004354101.1 | hypothetical protein PSEBR_a2798                      |
| <i>Pseudomonas brassicacearum</i> subsp. <i>brassicacearum</i> NFM421 | 6.40E-196 | Omp85 | YP_004355007.1 | Surface antigen protein                               |
| <i>Pseudomonas brassicacearum</i> subsp. <i>brassicacearum</i> NFM421 | 2.90E-194 | Omp85 | YP_004352251.1 | hypothetical protein PSEBR_a1073                      |
| <i>Pseudomonas brassicacearum</i> subsp. <i>brassicacearum</i> NFM421 | 1.50E-006 | Omp85 | YP_004355082.1 | hypothetical protein PSEBR_a3727                      |
| <i>Pseudomonas entomophila</i> L48                                    | 9.20E-213 | BamB  | YP_606741.1    | hypothetical protein PSEEN1024                        |
| <i>Pseudomonas entomophila</i> L48                                    | 6.10E-006 | BamB  | YP_606877.1    | glucose dehydrogenase Gcd                             |
| <i>Pseudomonas entomophila</i> L48                                    | 4.10E-005 | BamB  | YP_608486.1    | quininate dehydrogenase (pyrroloquinoline-quinone)    |
| <i>Pseudomonas entomophila</i> L48                                    | 4.50E-005 | BamC  | YP_609543.1    | lipoprotein                                           |
| <i>Pseudomonas entomophila</i> L48                                    | 6.10E-144 | BamD  | YP_610133.1    | competence lipoprotein ComL                           |
| <i>Pseudomonas entomophila</i> L48                                    | 8.60E-025 | BamE  | YP_606506.1    | outer membrane lipoprotein OmlA                       |
| <i>Pseudomonas entomophila</i> L48                                    | 7.20E-006 | BamE  | YP_610336.1    | DNA-binding transcriptional activator OsmE            |
| <i>Pseudomonas entomophila</i> L48                                    | 7.90E-005 | BamE  | YP_610516.1    | lipoprotein                                           |
| <i>Pseudomonas entomophila</i> L48                                    | 5.70E-201 | Omp85 | YP_609685.1    | surface antigen family outer membrane protein         |
| <i>Pseudomonas entomophila</i> L48                                    | 2.90E-006 | Omp85 | YP_607711.1    | surface antigen                                       |
| <i>Pseudomonas fluorescens</i> Pf-5                                   | 6.80E-192 | BamB  | YP_262031.1    | outer membrane assembly lipoprotein YfgL              |
| <i>Pseudomonas fluorescens</i> Pf-5                                   | 3.40E-009 | BamB  | YP_259328.1    | quinoprotein ethanol dehydrogenase PedH               |
| <i>Pseudomonas fluorescens</i> Pf-5                                   | 1.20E-008 | BamB  | YP_259323.1    | quinoprotein ethanol dehydrogenase PedE               |
| <i>Pseudomonas fluorescens</i> Pf-5                                   | 8.90E-006 | BamB  | YP_262726.1    | quininate/shikimate dehydrogenase                     |
| <i>Pseudomonas fluorescens</i> Pf-5                                   | 1.40E-005 | BamB  | YP_261996.1    | quinoprotein glucose dehydrogenase                    |
| <i>Pseudomonas fluorescens</i> Pf-5                                   | 9.90E-005 | BamC  | YP_258586.1    | lipoprotein                                           |
| <i>Pseudomonas fluorescens</i> Pf-5                                   | 9.60E-148 | BamD  | YP_262375.1    | competence lipoprotein ComL                           |
| <i>Pseudomonas fluorescens</i> Pf-5                                   | 1.80E-026 | BamE  | YP_257958.1    | outer membrane lipoprotein OmlA                       |
| <i>Pseudomonas fluorescens</i> Pf-5                                   | 7.90E-192 | Omp85 | YP_258315.1    | outer membrane protein assembly complex, YaeT protein |
| <i>Pseudomonas fluorescens</i> Pf-5                                   | 4.10E-006 | Omp85 | YP_261026.2    | OMP85 family outer membrane protein                   |
| <i>Pseudomonas fluorescens</i> Pf0-1                                  | 5.80E-195 | BamB  | YP_350326.1    | Pyrrolo-quinoline quinone                             |
| <i>Pseudomonas fluorescens</i> Pf0-1                                  | 3.20E-005 | BamB  | YP_350305.1    | quinoprotein glucose dehydrogenase                    |
| <i>Pseudomonas fluorescens</i> Pf0-1                                  | 5.90E-005 | BamB  | YP_348443.1    | Pyrrolo-quinoline quinone                             |
| <i>Pseudomonas fluorescens</i> Pf0-1                                  | 1.80E-005 | BamC  | YP_347104.1    | putative lipoprotein                                  |
| <i>Pseudomonas fluorescens</i> Pf0-1                                  | 1.70E-149 | BamD  | YP_350565.1    | competence lipoprotein ComL                           |
| <i>Pseudomonas fluorescens</i> Pf0-1                                  | 1.00E-005 | BamD  | YP_347719.1    | type II and III secretion system protein              |

## gamma\_e-5

|                               |           |       |                |                                                       |
|-------------------------------|-----------|-------|----------------|-------------------------------------------------------|
| Pseudomonas fluorescens Pf0-1 | 2.20E-025 | BamE  | YP_346491.1    | SmpA/OmlA                                             |
| Pseudomonas fluorescens Pf0-1 | 1.80E-191 | Omp85 | YP_346841.1    | surface antigen (D15)                                 |
| Pseudomonas fluorescens Pf0-1 | 5.60E-007 | Omp85 | YP_349376.1    | surface antigen (D15)                                 |
| Pseudomonas fluorescens SBW25 | 3.00E-191 | BamB  | YP_002874557.1 | hypothetical protein PFLU5054                         |
| Pseudomonas fluorescens SBW25 | 8.50E-006 | BamB  | YP_002870745.1 | quinoprotein glucose dehydrogenase                    |
| Pseudomonas fluorescens SBW25 | 4.30E-005 | BamC  | YP_002871123.1 | putative lipoprotein                                  |
| Pseudomonas fluorescens SBW25 | 3.90E-005 | BamD  | YP_001202223.1 | hypothetical protein pQBR0478                         |
| Pseudomonas fluorescens SBW25 | 3.10E-148 | BamD  | YP_002870444.1 | putative lipoprotein                                  |
| Pseudomonas fluorescens SBW25 | 1.30E-006 | BamE  | YP_001202124.1 | hypothetical protein pQBR0378                         |
| Pseudomonas fluorescens SBW25 | 4.80E-027 | BamE  | YP_002874775.1 | outer membrane lipoprotein                            |
| Pseudomonas fluorescens SBW25 | 6.30E-201 | Omp85 | YP_002873654.1 | putative surface antigen                              |
| Pseudomonas fluorescens SBW25 | 2.30E-195 | Omp85 | YP_002870930.1 | putative surface exported protein                     |
| Pseudomonas fluorescens SBW25 | 2.10E-006 | Omp85 | YP_002873432.1 | hypothetical protein PFLU3880                         |
| Pseudomonas fulva 12-X        | 3.10E-176 | BamB  | YP_004475345.1 | outer membrane assembly lipoprotein YfgL              |
| Pseudomonas fulva 12-X        | 4.10E-005 | BamB  | YP_004475831.1 | membrane-bound PQQ-dependent dehydrogenase            |
| Pseudomonas fulva 12-X        | 7.90E-005 | BamB  | YP_004474276.1 | membrane-bound PQQ-dependent dehydrogenase            |
| Pseudomonas fulva 12-X        | 4.80E-150 | BamD  | YP_004475866.1 | outer membrane assembly lipoprotein YfiO              |
| Pseudomonas fulva 12-X        | 1.10E-026 | BamE  | YP_004475660.1 | SmpA/OmlA domain-containing protein                   |
| Pseudomonas fulva 12-X        | 1.30E-005 | BamE  | YP_004475709.1 | SmpA/OmlA domain-containing protein                   |
| Pseudomonas fulva 12-X        | 6.30E-005 | BamE  | YP_004475180.1 | hypothetical protein Psefu_3123                       |
| Pseudomonas fulva 12-X        | 1.20E-204 | Omp85 | YP_004475480.1 | outer membrane protein assembly complex, YaeT protein |
| Pseudomonas fulva 12-X        | 1.50E-006 | Omp85 | YP_004474578.1 | surface antigen (D15)                                 |
| Pseudomonas mendocina NK-01   | 9.80E-197 | BamB  | YP_004381545.1 | pyrrolo-quinoline quinone                             |
| Pseudomonas mendocina NK-01   | 6.90E-009 | BamB  | YP_004380720.1 | pyrrolo-quinoline quinone                             |
| Pseudomonas mendocina NK-01   | 1.80E-007 | BamB  | YP_004380727.1 | pyrrolo-quinoline quinone                             |
| Pseudomonas mendocina NK-01   | 4.80E-007 | BamB  | YP_004380463.1 | methanol/ethanol family PQQ-dependent dehydrogenase   |
| Pseudomonas mendocina NK-01   | 8.30E-141 | BamD  | YP_004378839.1 | DNA uptake lipoprotein-like protein                   |
| Pseudomonas mendocina NK-01   | 1.20E-025 | BamE  | YP_004381716.1 | SmpA/OmlA domain-containing protein                   |
| Pseudomonas mendocina NK-01   | 1.80E-005 | BamE  | YP_004380344.1 | DNA-binding transcriptional activator OsmE            |
| Pseudomonas mendocina NK-01   | 7.00E-197 | Omp85 | YP_004381105.1 | surface antigen                                       |
| Pseudomonas mendocina NK-01   | 1.10E-006 | Omp85 | YP_004380119.1 | surface antigen                                       |
| Pseudomonas mendocina ymp     | 1.70E-195 | BamB  | YP_001188977.1 | Pyrrolo-quinoline quinone                             |
| Pseudomonas mendocina ymp     | 1.10E-008 | BamB  | YP_001187456.1 | Pyrrolo-quinoline quinone                             |
| Pseudomonas mendocina ymp     | 3.20E-007 | BamB  | YP_001187450.1 | Pyrrolo-quinoline quinone                             |
| Pseudomonas mendocina ymp     | 5.20E-143 | BamD  | YP_001186468.1 | DNA uptake lipoprotein-like protein                   |
| Pseudomonas mendocina ymp     | 1.40E-025 | BamE  | YP_001189108.1 | SmpA/OmlA domain-containing protein                   |
| Pseudomonas mendocina ymp     | 3.00E-006 | BamE  | YP_001187650.1 | DNA-binding transcriptional activator OsmE            |
| Pseudomonas mendocina ymp     | 7.80E-005 | BamE  | YP_001186012.1 | hypothetical protein Pmen_0510                        |

## gamma\_e-5

|                           |           |       |                |                                                                        |
|---------------------------|-----------|-------|----------------|------------------------------------------------------------------------|
| Pseudomonas mendocina ymp | 3.20E-197 | Omp85 | YP_001188531.1 | surface antigen (D15)                                                  |
| Pseudomonas mendocina ymp | 1.30E-006 | Omp85 | YP_001187922.1 | surface antigen (D15)                                                  |
| Pseudomonas putida F1     | 5.90E-215 | BamB  | YP_001266232.1 | Pyrrolo-quinoline quinone                                              |
| Pseudomonas putida F1     | 3.90E-009 | BamB  | YP_001268396.1 | Pyrrolo-quinoline quinone                                              |
| Pseudomonas putida F1     | 2.90E-008 | BamB  | YP_001268401.1 | Pyrrolo-quinoline quinone                                              |
| Pseudomonas putida F1     | 2.90E-006 | BamB  | YP_001269585.1 | Pyrrolo-quinoline quinone                                              |
| Pseudomonas putida F1     | 1.30E-005 | BamC  | YP_001266613.1 | hypothetical protein Pput_1268                                         |
| Pseudomonas putida F1     | 7.60E-147 | BamD  | YP_001266014.1 | DNA uptake lipoprotein-like protein                                    |
| Pseudomonas putida F1     | 2.20E-027 | BamE  | YP_001269901.1 | SmpA/OmlA domain-containing protein                                    |
| Pseudomonas putida F1     | 6.60E-006 | BamE  | YP_001270037.1 | DNA-binding transcriptional activator OsmE                             |
| Pseudomonas putida F1     | 3.40E-005 | BamE  | YP_001270216.1 | hypothetical protein Pput_4912                                         |
| Pseudomonas putida F1     | 6.20E-203 | Omp85 | YP_001269486.1 | surface antigen (D15)                                                  |
| Pseudomonas putida F1     | 1.60E-197 | Omp85 | YP_001267708.1 | surface antigen (D15)                                                  |
| Pseudomonas putida F1     | 9.70E-007 | Omp85 | YP_001268114.1 | surface antigen (D15)                                                  |
| Pseudomonas putida GB-1   | 4.30E-211 | BamB  | YP_001667145.1 | outer membrane assembly lipoprotein YfgL                               |
| Pseudomonas putida GB-1   | 8.10E-009 | BamB  | YP_001669352.1 | methanol/ethanol family PQQ-dependent dehydrogenase                    |
| Pseudomonas putida GB-1   | 1.50E-008 | BamB  | YP_001669357.1 | methanol/ethanol family PQQ-dependent dehydrogenase                    |
| Pseudomonas putida GB-1   | 2.80E-006 | BamB  | YP_001670585.1 | PQQ-dependent dehydrogenase glucose/quininate/shikimate family protein |
| Pseudomonas putida GB-1   | 9.60E-005 | BamB  | YP_001668588.1 | PQQ-dependent dehydrogenase glucose/quininate/shikimate family protein |
| Pseudomonas putida GB-1   | 1.00E-005 | BamC  | YP_001670404.1 | lipoprotein                                                            |
| Pseudomonas putida GB-1   | 1.60E-145 | BamD  | YP_001666915.1 | competence lipoprotein ComL                                            |
| Pseudomonas putida GB-1   | 2.30E-027 | BamE  | YP_001670954.1 | SmpA/OmlA domain-containing protein                                    |
| Pseudomonas putida GB-1   | 6.60E-006 | BamE  | YP_001671132.1 | DNA-binding transcriptional activator OsmE                             |
| Pseudomonas putida GB-1   | 8.30E-006 | BamE  | YP_001669053.1 | SmpA/OmlA domain-containing protein                                    |
| Pseudomonas putida GB-1   | 3.40E-005 | BamE  | YP_001671308.1 | hypothetical protein PputGB1_5088                                      |
| Pseudomonas putida GB-1   | 4.80E-205 | Omp85 | YP_001668806.1 | outer membrane protein assembly complex, YaeT protein                  |
| Pseudomonas putida GB-1   | 1.10E-204 | Omp85 | YP_001667398.1 | outer membrane protein assembly complex, YaeT protein                  |
| Pseudomonas putida GB-1   | 1.30E-006 | Omp85 | YP_001669120.1 | surface antigen (D15)                                                  |
| Pseudomonas putida KT2440 | 8.60E-215 | BamB  | NP_743017.1    | hypothetical protein PP_0856                                           |
| Pseudomonas putida KT2440 | 4.50E-009 | BamB  | NP_744823.1    | quinoprotein ethanol dehydrogenase                                     |
| Pseudomonas putida KT2440 | 1.50E-008 | BamB  | NP_744818.1    | quinoprotein ethanol dehydrogenase                                     |
| Pseudomonas putida KT2440 | 3.10E-006 | BamB  | NP_743602.1    | glucose dehydrogenase (pyrroloquinoline-quinone)                       |
| Pseudomonas putida KT2440 | 1.80E-005 | BamC  | NP_743398.1    | lipoprotein                                                            |
| Pseudomonas putida KT2440 | 2.00E-146 | BamD  | NP_742784.1    | competence lipoprotein ComL                                            |
| Pseudomonas putida KT2440 | 2.20E-027 | BamE  | NP_746839.1    | SmpA/OmlA domain-containing protein                                    |
| Pseudomonas putida KT2440 | 3.40E-006 | BamE  | NP_746960.1    | DNA-binding transcriptional activator OsmE                             |
| Pseudomonas putida KT2440 | 3.40E-005 | BamE  | NP_747139.1    | hypothetical protein PP_5038                                           |

## gamma\_e-5

|                                             |           |       |                |                                                                        |
|---------------------------------------------|-----------|-------|----------------|------------------------------------------------------------------------|
| Pseudomonas putida KT2440                   | 2.10E-202 | Omp85 | NP_743756.1    | surface antigen family outer membrane protein                          |
| Pseudomonas putida KT2440                   | 9.10E-198 | Omp85 | NP_745513.1    | surface antigen family protein                                         |
| Pseudomonas putida KT2440                   | 8.20E-007 | Omp85 | NP_745036.1    | surface antigen (D15)                                                  |
| Pseudomonas putida S16                      | 2.10E-214 | BamB  | YP_004700381.1 | outer membrane assembly lipoprotein YfgL                               |
| Pseudomonas putida S16                      | 1.50E-008 | BamB  | YP_004701662.1 | quinoprotein ethanol dehydrogenase                                     |
| Pseudomonas putida S16                      | 2.00E-008 | BamB  | YP_004701667.1 | putative quinoprotein ethanol dehydrogenase                            |
| Pseudomonas putida S16                      | 5.30E-006 | BamB  | YP_004703623.1 | glucose dehydrogenase (pyrroloquinoline-quinone)                       |
| Pseudomonas putida S16                      | 1.90E-005 | BamC  | YP_004703400.1 | lipoprotein                                                            |
| Pseudomonas putida S16                      | 1.50E-146 | BamD  | YP_004700079.1 | putative competence lipoprotein ComL                                   |
| Pseudomonas putida S16                      | 1.60E-005 | BamE  | YP_004702035.1 | DNA-binding transcriptional activator OsmE                             |
| Pseudomonas putida S16                      | 1.90E-005 | BamE  | YP_004704290.1 | putative lipoprotein                                                   |
| Pseudomonas putida S16                      | 2.90E-005 | BamE  | YP_004704111.1 | DNA-binding transcriptional activator OsmE                             |
| Pseudomonas putida S16                      | 1.00E-205 | Omp85 | YP_004700649.1 | surface antigen family outer membrane protein                          |
| Pseudomonas putida S16                      | 1.10E-006 | Omp85 | YP_004702447.1 | surface antigen (D15)                                                  |
| Pseudomonas putida W619                     | 8.80E-228 | BamB  | YP_001751171.1 | outer membrane assembly lipoprotein YfgL                               |
| Pseudomonas putida W619                     | 7.70E-007 | BamB  | YP_001749557.1 | methanol/ethanol family PQQ-dependent dehydrogenase                    |
| Pseudomonas putida W619                     | 5.00E-006 | BamB  | YP_001747955.1 | PQQ-dependent dehydrogenase glucose/quininate/shikimate family protein |
| Pseudomonas putida W619                     | 4.40E-005 | BamB  | YP_001749817.1 | PQQ-dependent dehydrogenase glucose/quininate/shikimate family protein |
| Pseudomonas putida W619                     | 9.30E-006 | BamC  | YP_001750823.1 | lipoprotein                                                            |
| Pseudomonas putida W619                     | 2.70E-146 | BamD  | YP_001751397.1 | competence lipoprotein ComL                                            |
| Pseudomonas putida W619                     | 1.10E-027 | BamE  | YP_001747575.1 | SmpA/OmlA domain-containing protein                                    |
| Pseudomonas putida W619                     | 5.50E-006 | BamE  | YP_001751496.1 | DNA-binding transcriptional activator OsmE                             |
| Pseudomonas putida W619                     | 5.50E-005 | BamE  | YP_001747300.1 | lipoprotein                                                            |
| Pseudomonas putida W619                     | 1.20E-203 | Omp85 | YP_001750923.1 | outer membrane protein assembly complex, YaeT protein                  |
| Pseudomonas putida W619                     | 9.20E-007 | Omp85 | YP_001749264.1 | surface antigen (D15)                                                  |
| Pseudomonas stutzeri A1501                  | 2.80E-177 | BamB  | YP_001173511.1 | PQQ repeat-containing protein                                          |
| Pseudomonas stutzeri A1501                  | 4.40E-008 | BamB  | YP_001172772.1 | quinoprotein alcohol dehydrogenase                                     |
| Pseudomonas stutzeri A1501                  | 5.90E-008 | BamB  | YP_001172766.1 | quinoprotein alcohol dehydrogenase                                     |
| Pseudomonas stutzeri A1501                  | 2.10E-005 | BamB  | YP_001171530.1 | glucose dehydrogenase                                                  |
| Pseudomonas stutzeri A1501                  | 2.40E-005 | BamB  | YP_001171988.1 | glucose dehydrogenase                                                  |
| Pseudomonas stutzeri A1501                  | 6.10E-142 | BamD  | YP_001174110.1 | competence protein ComL                                                |
| Pseudomonas stutzeri A1501                  | 9.80E-005 | BamD  | YP_001170827.1 | cellulose synthase subunit BcsC                                        |
| Pseudomonas stutzeri A1501                  | 2.00E-026 | BamE  | YP_001173802.1 | outer membrane lipoprotein OmlA                                        |
| Pseudomonas stutzeri A1501                  | 2.00E-192 | Omp85 | YP_001172072.1 | surface antigen family outer membrane protein                          |
| Pseudomonas stutzeri A1501                  | 2.40E-007 | Omp85 | YP_001172689.1 | Outer membrane protein                                                 |
| Pseudomonas stutzeri ATCC 17588 = LMG 11199 | 7.00E-179 | BamB  | YP_004715444.1 | PQQ repeat-containing protein                                          |
| Pseudomonas stutzeri ATCC 17588 = LMG 11199 | 5.90E-008 | BamB  | YP_004714520.1 | quinoprotein alcohol dehydrogenase                                     |

## gamma\_e-5

|                                             |           |       |                |                                                       |
|---------------------------------------------|-----------|-------|----------------|-------------------------------------------------------|
| Pseudomonas stutzeri ATCC 17588 = LMG 11199 | 6.00E-008 | BamB  | YP_004714526.1 | quinoprotein alcohol dehydrogenase                    |
| Pseudomonas stutzeri ATCC 17588 = LMG 11199 | 2.90E-006 | BamB  | YP_004715275.1 | alcohol dehydrogenase                                 |
| Pseudomonas stutzeri ATCC 17588 = LMG 11199 | 1.20E-005 | BamB  | YP_004713262.1 | glucose dehydrogenase                                 |
| Pseudomonas stutzeri ATCC 17588 = LMG 11199 | 1.90E-005 | BamB  | YP_004713757.1 | glucose dehydrogenase                                 |
| Pseudomonas stutzeri ATCC 17588 = LMG 11199 | 6.10E-142 | BamD  | YP_004715979.1 | competence protein ComL                               |
| Pseudomonas stutzeri ATCC 17588 = LMG 11199 | 2.00E-026 | BamE  | YP_004715746.1 | outer membrane lipoprotein OmlA                       |
| Pseudomonas stutzeri ATCC 17588 = LMG 11199 | 1.40E-201 | Omp85 | YP_004713819.1 | surface antigen family outer membrane protein         |
| Pseudomonas stutzeri ATCC 17588 = LMG 11199 | 8.10E-007 | Omp85 | YP_004714440.1 | Outer membrane protein                                |
| Pseudomonas syringae pv. phaseolicola 1448A | 2.00E-198 | BamB  | YP_273581.1    | PQQ repeat-containing protein                         |
| Pseudomonas syringae pv. phaseolicola 1448A | 8.70E-007 | BamB  | YP_275108.2    | quininate/shikimate dehydrogenase                     |
| Pseudomonas syringae pv. phaseolicola 1448A | 2.40E-005 | BamB  | YP_276063.1    | quinoprotein glucose dehydrogenase                    |
| Pseudomonas syringae pv. phaseolicola 1448A | 3.00E-142 | BamD  | YP_273031.1    | competence lipoprotein ComL                           |
| Pseudomonas syringae pv. phaseolicola 1448A | 8.90E-005 | BamD  | YP_273266.1    | TPR domain-containing protein                         |
| Pseudomonas syringae pv. phaseolicola 1448A | 2.60E-027 | BamE  | YP_276330.1    | outer membrane lipoprotein OmlA                       |
| Pseudomonas syringae pv. phaseolicola 1448A | 1.70E-006 | BamE  | YP_276605.1    | DNA-binding transcriptional activator OsmE            |
| Pseudomonas syringae pv. phaseolicola 1448A | 9.60E-207 | Omp85 | YP_275970.1    | outer membrane protein                                |
| Pseudomonas syringae pv. phaseolicola 1448A | 5.50E-199 | Omp85 | YP_273714.1    | OMP85 family outer membrane protein                   |
| Pseudomonas syringae pv. phaseolicola 1448A | 2.30E-006 | Omp85 | YP_274827.1    | OMP85 family outer membrane protein                   |
| Pseudomonas syringae pv. syringae B728a     | 8.90E-197 | BamB  | YP_234340.1    | quinoprotein                                          |
| Pseudomonas syringae pv. syringae B728a     | 1.80E-005 | BamB  | YP_236998.1    | quinoprotein                                          |
| Pseudomonas syringae pv. syringae B728a     | 8.20E-005 | BamB  | YP_235651.1    | quinoprotein                                          |
| Pseudomonas syringae pv. syringae B728a     | 6.90E-143 | BamD  | YP_233831.1    | competence lipoprotein ComL, putative                 |
| Pseudomonas syringae pv. syringae B728a     | 2.60E-027 | BamE  | YP_237267.1    | SmpA/OmlA                                             |
| Pseudomonas syringae pv. syringae B728a     | 7.50E-007 | BamE  | YP_237514.1    | DNA-binding transcriptional activator OsmE            |
| Pseudomonas syringae pv. syringae B728a     | 5.70E-207 | Omp85 | YP_234440.1    | surface antigen (D15):surface antigen variable number |
| Pseudomonas syringae pv. syringae B728a     | 1.10E-198 | Omp85 | YP_236863.1    | surface antigen (D15):surface antigen variable number |
| Pseudomonas syringae pv. syringae B728a     | 3.40E-006 | Omp85 | YP_235555.1    | surface antigen (D15):surface antigen variable number |
| Pseudomonas syringae pv. tomato str. DC3000 | 2.00E-198 | BamB  | NP_791263.1    | PQQ enzyme repeat domain-containing protein           |
| Pseudomonas syringae pv. tomato str. DC3000 | 2.00E-006 | BamB  | NP_792378.1    | glucose dehydrogenase                                 |
| Pseudomonas syringae pv. tomato str. DC3000 | 2.00E-005 | BamB  | NP_793957.1    | glucose dehydrogenase                                 |
| Pseudomonas syringae pv. tomato str. DC3000 | 9.20E-141 | BamD  | NP_790673.1    | competence lipoprotein ComL                           |
| Pseudomonas syringae pv. tomato str. DC3000 | 6.60E-027 | BamE  | NP_794262.1    | outer membrane lipoprotein OmlA                       |
| Pseudomonas syringae pv. tomato str. DC3000 | 5.20E-007 | BamE  | NP_794637.1    | osmotically-inducible lipoprotein OsmE                |
| Pseudomonas syringae pv. tomato str. DC3000 | 2.10E-208 | Omp85 | NP_791367.1    | outer membrane protein                                |
| Pseudomonas syringae pv. tomato str. DC3000 | 3.60E-006 | Omp85 | NP_792555.1    | hypothetical protein PSPTO_2749                       |
| Pseudoxanthomonas suwonensis 11-1           | 3.30E-108 | BamB  | YP_004146477.1 | outer membrane assembly lipoprotein YfgL              |
| Pseudoxanthomonas suwonensis 11-1           | 1.70E-081 | BamD  | YP_004145647.1 | outer membrane assembly lipoprotein YfiO              |
| Pseudoxanthomonas suwonensis 11-1           | 8.00E-022 | BamE  | YP_004146733.1 | SmpA/OmlA domain-containing protein                   |

## gamma\_e-5

|                                   |           |       |                |                                                                                   |
|-----------------------------------|-----------|-------|----------------|-----------------------------------------------------------------------------------|
| Pseudoxanthomonas suwonensis 11-1 | 6.70E-178 | Omp85 | YP_004145981.1 | outer membrane protein assembly complex, YaeT protein                             |
| Pseudoxanthomonas suwonensis 11-1 | 3.00E-006 | Omp85 | YP_004148019.1 | surface antigen (D15)                                                             |
| Psychrobacter arcticus 273-4      | 1.50E-046 | BamB  | YP_263978.1    | hypothetical protein Psyc_0685                                                    |
| Psychrobacter arcticus 273-4      | 4.10E-006 | BamB  | YP_264521.1    | quinoprotein glucose dehydrogenase                                                |
| Psychrobacter arcticus 273-4      | 3.30E-065 | BamD  | YP_264542.1    | lipoprotein                                                                       |
| Psychrobacter arcticus 273-4      | 5.30E-020 | BamE  | YP_263568.1    | outer membrane lipoprotein OmlA                                                   |
| Psychrobacter arcticus 273-4      | 8.40E-146 | Omp85 | YP_264811.1    | putative surface antigen (D15)                                                    |
| Psychrobacter arcticus 273-4      | 3.30E-006 | Omp85 | YP_264792.1    | hypothetical protein Psyc_1510                                                    |
| Psychrobacter cryohalolentis K5   | 4.10E-043 | BamB  | YP_579922.1    | Pyrrolo-quinoline quinone                                                         |
| Psychrobacter cryohalolentis K5   | 1.20E-065 | BamD  | YP_580391.1    | hypothetical protein Pcryo_1126                                                   |
| Psychrobacter cryohalolentis K5   | 5.20E-020 | BamE  | YP_579558.1    | SmpA/OmlA                                                                         |
| Psychrobacter cryohalolentis K5   | 4.10E-142 | Omp85 | YP_580969.1    | surface antigen (D15)                                                             |
| Psychrobacter cryohalolentis K5   | 3.20E-006 | Omp85 | YP_580950.1    | surface antigen (D15)                                                             |
| Psychrobacter sp. PRwf-1          | 1.40E-060 | BamB  | YP_001280789.1 | pyrrolo-quinoline quinone                                                         |
| Psychrobacter sp. PRwf-1          | 2.80E-006 | BamB  | YP_001280665.1 | pyrrolo-quinoline quinone                                                         |
| Psychrobacter sp. PRwf-1          | 1.30E-058 | BamD  | YP_001280464.1 | DNA uptake lipoprotein-like protein                                               |
| Psychrobacter sp. PRwf-1          | 1.20E-015 | BamE  | YP_001280776.1 | SmpA/OmlA domain-containing protein                                               |
| Psychrobacter sp. PRwf-1          | 2.50E-145 | Omp85 | YP_001280686.1 | surface antigen (D15)                                                             |
| Psychrobacter sp. PRwf-1          | 9.20E-006 | Omp85 | YP_001280498.1 | surface antigen (D15)                                                             |
| Psychromonas ingrahamii 37        | 6.10E-193 | BamB  | YP_942606.1    | Pyrrolo-quinoline quinone                                                         |
| Psychromonas ingrahamii 37        | 2.40E-005 | BamB  | YP_944384.1    | glucose dehydrogenase                                                             |
| Psychromonas ingrahamii 37        | 5.80E-016 | BamC  | YP_943237.1    | NlpB/DapX family lipoprotein                                                      |
| Psychromonas ingrahamii 37        | 2.00E-115 | BamD  | YP_944552.1    | putative lipoprotein                                                              |
| Psychromonas ingrahamii 37        | 2.00E-005 | BamD  | YP_941758.1    | lytic transglycosylase                                                            |
| Psychromonas ingrahamii 37        | 4.40E-005 | BamD  | YP_942612.1    | LppC family lipoprotein                                                           |
| Psychromonas ingrahamii 37        | 8.20E-029 | BamE  | YP_943001.1    | Outer membrane lipoprotein OmlA                                                   |
| Psychromonas ingrahamii 37        | 3.30E-192 | Omp85 | YP_944269.1    | surface antigen (D15)                                                             |
| Psychromonas ingrahamii 37        | 9.30E-006 | Omp85 | YP_943286.1    | surface antigen (D15)                                                             |
| Rahnella sp. Y9602                | 1.30E-187 | BamB  | YP_004211796.1 | outer membrane assembly lipoprotein YfgL                                          |
| Rahnella sp. Y9602                | 1.10E-005 | BamB  | YP_004215425.1 | membrane-bound PQQ-dependent dehydrogenase,<br>glucose/quinolate/shikimate family |
| Rahnella sp. Y9602                | 1.60E-005 | BamB  | YP_004215484.1 | membrane-bound PQQ-dependent dehydrogenase,<br>glucose/quinolate/shikimate family |
| Rahnella sp. Y9602                | 2.60E-198 | BamC  | YP_004213984.1 | lipoprotein                                                                       |
| Rahnella sp. Y9602                | 8.90E-155 | BamD  | YP_004211488.1 | outer membrane assembly lipoprotein YfiO                                          |
| Rahnella sp. Y9602                | 1.60E-064 | BamE  | YP_004214170.1 | SmpA/OmlA domain-containing protein                                               |
| Rahnella sp. Y9602                | 2.20E-008 | BamE  | YP_004212321.1 | SmpA/OmlA domain-containing protein                                               |
| Rahnella sp. Y9602                | 0.00E+000 | Omp85 | YP_004211623.1 | outer membrane protein assembly complex, YaeT protein                             |
| Rahnella sp. Y9602                | 1.70E-006 | Omp85 | YP_004211209.1 | surface antigen (D15)                                                             |

## gamma\_e-5

|                                                                       |           |       |                |                                                                        |
|-----------------------------------------------------------------------|-----------|-------|----------------|------------------------------------------------------------------------|
| Rahnella sp. Y9602                                                    | 1.40E-285 | Omp85 | YP_004215526.1 | outer membrane protein assembly complex, YaeT protein                  |
| Saccharophagus degradans 2-40                                         | 6.40E-122 | BamB  | YP_526911.1    | PQQ repeat-containing protein                                          |
| Saccharophagus degradans 2-40                                         | 1.00E-006 | BamC  | YP_528093.1    | hypothetical protein Sde_2621                                          |
| Saccharophagus degradans 2-40                                         | 8.90E-105 | BamD  | YP_528024.1    | Acyl-(acyl-carrier-protein)--UDP-N-acetylglucosamine O-acyltransferase |
| Saccharophagus degradans 2-40                                         | 1.80E-005 | BamD  | YP_529032.1    | hypothetical protein Sde_3565                                          |
| Saccharophagus degradans 2-40                                         | 4.20E-025 | BamE  | YP_528209.1    | small protein A (tmRNA-binding)-like protein                           |
| Saccharophagus degradans 2-40                                         | 4.90E-005 | BamE  | YP_526996.1    | hypothetical protein Sde_1522                                          |
| Saccharophagus degradans 2-40                                         | 3.40E-145 | Omp85 | YP_528061.1    | dihydrodipicolinate synthase subfamily protein                         |
| Saccharophagus degradans 2-40                                         | 2.90E-005 | Omp85 | YP_525547.1    | Outer membrane protein/protective antigen OMA87-like protein           |
| Salmonella bongori NCTC 12419                                         | 9.40E-213 | BamB  | YP_004731122.1 | putative lipoprotein                                                   |
| Salmonella bongori NCTC 12419                                         | 9.70E-005 | BamB  | YP_004729070.1 | glucose dehydrogenase                                                  |
| Salmonella bongori NCTC 12419                                         | 2.20E-228 | BamC  | YP_004731094.1 | putative lipoprotein                                                   |
| Salmonella bongori NCTC 12419                                         | 1.00E-171 | BamD  | YP_004731203.1 | putative lipoprotein                                                   |
| Salmonella bongori NCTC 12419                                         | 1.10E-067 | BamE  | YP_004731225.1 | small protein A                                                        |
| Salmonella bongori NCTC 12419                                         | 4.00E-005 | BamE  | YP_004730037.1 | osmotically inducible lipoprotein E                                    |
| Salmonella bongori NCTC 12419                                         | 0.00E+000 | Omp85 | YP_004729124.1 | outer membrane protein                                                 |
| Salmonella bongori NCTC 12419                                         | 8.90E-007 | Omp85 | YP_004732638.1 | hypothetical protein SBG_3853                                          |
| Salmonella enterica subsp. arizonae serovar 62:z4,z23:-- str. RSK2980 | 5.70E-212 | BamB  | YP_001569438.1 | outer membrane protein assembly complex subunit YfgL                   |
| Salmonella enterica subsp. arizonae serovar 62:z4,z23:-- str. RSK2980 | 8.00E-005 | BamB  | YP_001571815.1 | glucose dehydrogenase                                                  |
| Salmonella enterica subsp. arizonae serovar 62:z4,z23:-- str. RSK2980 | 2.90E-226 | BamC  | YP_001569473.1 | lipoprotein                                                            |
| Salmonella enterica subsp. arizonae serovar 62:z4,z23:-- str. RSK2980 | 4.10E-171 | BamD  | YP_001569350.1 | outer membrane protein assembly complex subunit YfiO                   |
| Salmonella enterica subsp. arizonae serovar 62:z4,z23:-- str. RSK2980 | 3.80E-068 | BamE  | YP_001569331.1 | hypothetical protein SARI_00243                                        |
| Salmonella enterica subsp. arizonae serovar 62:z4,z23:-- str. RSK2980 | 2.50E-005 | BamE  | YP_001572580.1 | hypothetical protein SARI_03626                                        |
| Salmonella enterica subsp. arizonae serovar 62:z4,z23:-- str. RSK2980 | 4.00E-005 | BamE  | YP_001570700.1 | DNA-binding transcriptional activator OsmE                             |
| Salmonella enterica subsp. arizonae serovar 62:z4,z23:-- str. RSK2980 | 0.00E+000 | Omp85 | YP_001571769.1 | outer membrane protein assembly factor YaeT                            |
| Salmonella enterica subsp. arizonae serovar 62:z4,z23:-- str. RSK2980 | 1.10E-006 | Omp85 | YP_001572199.1 | hypothetical protein SARI_03221                                        |
| Salmonella enterica subsp. enterica serovar Agona str. SL483          | 5.70E-214 | BamB  | YP_002147473.1 | outer membrane protein assembly complex subunit YfgL                   |
| Salmonella enterica subsp. enterica serovar Agona str. SL483          | 5.40E-005 | BamB  | YP_002145168.1 | quinoprotein glucose dehydrogenase                                     |
| Salmonella enterica subsp. enterica serovar Agona str. SL483          | 1.90E-227 | BamC  | YP_002147439.1 | lipoprotein                                                            |
| Salmonella enterica subsp. enterica serovar Agona str. SL483          | 4.10E-171 | BamD  | YP_002147566.1 | outer membrane protein assembly complex subunit YfiO                   |
| Salmonella enterica subsp. enterica serovar Agona str. SL483          | 5.10E-069 | BamE  | YP_002147620.1 | hypothetical protein SeAg_B2830                                        |
| Salmonella enterica subsp. enterica serovar Agona str. SL483          | 4.00E-005 | BamE  | YP_002146724.1 | DNA-binding transcriptional activator OsmE                             |
| Salmonella enterica subsp. enterica serovar Agona str. SL483          | 0.00E+000 | Omp85 | YP_002145229.1 | outer membrane protein assembly factor YaeT                            |
| Salmonella enterica subsp. enterica serovar Agona str. SL483          | 7.70E-007 | Omp85 | YP_002149324.1 | outer membrane protein, OMP85 family                                   |
| Salmonella enterica subsp. enterica serovar Choleraesuis str. SC-B67  | 1.20E-212 | BamB  | YP_217504.1    | outer membrane protein assembly complex subunit YfgL                   |
| Salmonella enterica subsp. enterica serovar Choleraesuis str. SC-B67  | 8.20E-005 | BamB  | YP_215156.1    | glucose dehydrogenase                                                  |
| Salmonella enterica subsp. enterica serovar Choleraesuis str. SC-B67  | 4.20E-226 | BamC  | YP_217470.1    | lipoprotein                                                            |

## gamma\_e-5

|                                                                      |           |       |                |                                                      |
|----------------------------------------------------------------------|-----------|-------|----------------|------------------------------------------------------|
| Salmonella enterica subsp. enterica serovar Choleraesuis str. SC-B67 | 3.30E-170 | BamD  | YP_217653.1    | outer membrane protein assembly complex subunit YfiO |
| Salmonella enterica subsp. enterica serovar Choleraesuis str. SC-B67 | 5.10E-069 | BamE  | YP_217672.1    | hypothetical protein SC2685                          |
| Salmonella enterica subsp. enterica serovar Choleraesuis str. SC-B67 | 4.00E-005 | BamE  | YP_216319.1    | DNA-binding transcriptional activator OsmE           |
| Salmonella enterica subsp. enterica serovar Choleraesuis str. SC-B67 | 0.00E+000 | Omp85 | YP_215211.1    | outer membrane protein assembly factor YaeT          |
| Salmonella enterica subsp. enterica serovar Choleraesuis str. SC-B67 | 8.70E-007 | Omp85 | YP_219271.1    | hypothetical protein SC4284                          |
| Salmonella enterica subsp. enterica serovar Dublin str. CT_02021853  | 2.70E-212 | BamB  | YP_002216583.1 | outer membrane protein assembly complex subunit YfgL |
| Salmonella enterica subsp. enterica serovar Dublin str. CT_02021853  | 7.80E-005 | BamB  | YP_002214125.1 | quinoprotein glucose dehydrogenase                   |
| Salmonella enterica subsp. enterica serovar Dublin str. CT_02021853  | 9.20E-228 | BamC  | YP_002216555.1 | lipoprotein                                          |
| Salmonella enterica subsp. enterica serovar Dublin str. CT_02021853  | 4.10E-171 | BamD  | YP_002216674.1 | outer membrane protein assembly complex subunit YfiO |
| Salmonella enterica subsp. enterica serovar Dublin str. CT_02021853  | 5.10E-069 | BamE  | YP_002216693.1 | hypothetical protein SeD_A3012                       |
| Salmonella enterica subsp. enterica serovar Dublin str. CT_02021853  | 4.00E-005 | BamE  | YP_002215813.1 | DNA-binding transcriptional activator OsmE           |
| Salmonella enterica subsp. enterica serovar Dublin str. CT_02021853  | 0.00E+000 | Omp85 | YP_002214185.1 | outer membrane protein assembly factor YaeT          |
| Salmonella enterica subsp. enterica serovar Dublin str. CT_02021853  | 8.60E-007 | Omp85 | YP_002218292.1 | OMP85 family outer membrane protein                  |
| Salmonella enterica subsp. enterica serovar Enteritidis str. P125109 | 5.70E-214 | BamB  | YP_002244579.1 | outer membrane protein assembly complex subunit YfgL |
| Salmonella enterica subsp. enterica serovar Enteritidis str. P125109 | 7.80E-005 | BamB  | YP_002242336.1 | glucose dehydrogenase                                |
| Salmonella enterica subsp. enterica serovar Enteritidis str. P125109 | 3.00E-226 | BamC  | YP_002244550.1 | lipoprotein                                          |
| Salmonella enterica subsp. enterica serovar Enteritidis str. P125109 | 4.10E-171 | BamD  | YP_002244664.1 | outer membrane protein assembly complex subunit YfiO |
| Salmonella enterica subsp. enterica serovar Enteritidis str. P125109 | 5.10E-069 | BamE  | YP_002244683.1 | hypothetical protein SEN2605                         |
| Salmonella enterica subsp. enterica serovar Enteritidis str. P125109 | 4.00E-005 | BamE  | YP_002243831.1 | DNA-binding transcriptional activator OsmE           |
| Salmonella enterica subsp. enterica serovar Enteritidis str. P125109 | 0.00E+000 | Omp85 | YP_002242393.1 | outer membrane protein assembly factor YaeT          |
| Salmonella enterica subsp. enterica serovar Enteritidis str. P125109 | 9.40E-007 | Omp85 | YP_002246207.1 | hypothetical protein SEN4178                         |
| Salmonella enterica subsp. enterica serovar Gallinarum str. 287/91   | 5.70E-214 | BamB  | YP_002227420.1 | outer membrane protein assembly complex subunit YfgL |
| Salmonella enterica subsp. enterica serovar Gallinarum str. 287/91   | 3.00E-226 | BamC  | YP_002227392.1 | lipoprotein                                          |
| Salmonella enterica subsp. enterica serovar Gallinarum str. 287/91   | 4.10E-171 | BamD  | YP_002227503.1 | outer membrane protein assembly complex subunit YfiO |
| Salmonella enterica subsp. enterica serovar Gallinarum str. 287/91   | 5.10E-069 | BamE  | YP_002227522.1 | hypothetical protein SG2662                          |
| Salmonella enterica subsp. enterica serovar Gallinarum str. 287/91   | 4.00E-005 | BamE  | YP_002226765.1 | DNA-binding transcriptional activator OsmE           |
| Salmonella enterica subsp. enterica serovar Gallinarum str. 287/91   | 0.00E+000 | Omp85 | YP_002225362.1 | outer membrane protein assembly factor YaeT          |
| Salmonella enterica subsp. enterica serovar Gallinarum str. 287/91   | 7.90E-007 | Omp85 | YP_002228967.1 | hypothetical protein SG4254                          |
| Salmonella enterica subsp. enterica serovar Heidelberg str. SL476    | 5.70E-214 | BamB  | YP_002046578.1 | outer membrane protein assembly complex subunit YfgL |
| Salmonella enterica subsp. enterica serovar Heidelberg str. SL476    | 8.90E-005 | BamB  | YP_002044146.1 | quinoprotein glucose dehydrogenase                   |
| Salmonella enterica subsp. enterica serovar Heidelberg str. SL476    | 3.60E-227 | BamC  | YP_002046551.1 | lipoprotein                                          |
| Salmonella enterica subsp. enterica serovar Heidelberg str. SL476    | 4.10E-171 | BamD  | YP_002046669.1 | outer membrane protein assembly complex subunit YfiO |
| Salmonella enterica subsp. enterica serovar Heidelberg str. SL476    | 5.10E-069 | BamE  | YP_002046688.1 | hypothetical protein SeHA_C2900                      |
| Salmonella enterica subsp. enterica serovar Heidelberg str. SL476    | 4.00E-005 | BamE  | YP_002045319.1 | DNA-binding transcriptional activator OsmE           |
| Salmonella enterica subsp. enterica serovar Heidelberg str. SL476    | 0.00E+000 | Omp85 | YP_002044214.1 | outer membrane protein assembly factor YaeT          |
| Salmonella enterica subsp. enterica serovar Heidelberg str. SL476    | 7.90E-007 | Omp85 | YP_002048452.1 | OMP85 family outer membrane protein                  |
| Salmonella enterica subsp. enterica serovar Newport str. SL254       | 5.70E-214 | BamB  | YP_002041778.1 | outer membrane protein assembly complex subunit YfgL |
| Salmonella enterica subsp. enterica serovar Newport str. SL254       | 8.90E-005 | BamB  | YP_002039404.1 | quinoprotein glucose dehydrogenase                   |



## gamma\_e-5

|                                                                          |           |       |                |                                                      |
|--------------------------------------------------------------------------|-----------|-------|----------------|------------------------------------------------------|
| Salmonella enterica subsp. enterica serovar Newport str. SL254           | 3.60E-227 | BamC  | YP_002041747.1 | lipoprotein                                          |
| Salmonella enterica subsp. enterica serovar Newport str. SL254           | 4.10E-171 | BamD  | YP_002041927.1 | outer membrane protein assembly complex subunit YfiO |
| Salmonella enterica subsp. enterica serovar Newport str. SL254           | 5.10E-069 | BamE  | YP_002041946.1 | hypothetical protein SNSL254_A2898                   |
| Salmonella enterica subsp. enterica serovar Newport str. SL254           | 4.00E-005 | BamE  | YP_002040571.1 | DNA-binding transcriptional activator OsmE           |
| Salmonella enterica subsp. enterica serovar Newport str. SL254           | 0.00E+000 | Omp85 | YP_002039464.1 | outer membrane protein assembly factor YaeT          |
| Salmonella enterica subsp. enterica serovar Newport str. SL254           | 8.60E-007 | Omp85 | YP_002043666.1 | outer membrane protein OMP85 family                  |
| Salmonella enterica subsp. enterica serovar Paratyphi A str. AKU_12601   | 5.70E-214 | BamB  | YP_002141172.1 | outer membrane protein assembly complex subunit YfgL |
| Salmonella enterica subsp. enterica serovar Paratyphi A str. AKU_12601   | 5.00E-005 | BamB  | YP_002141013.1 | glucose dehydrogenase                                |
| Salmonella enterica subsp. enterica serovar Paratyphi A str. AKU_12601   | 4.20E-226 | BamC  | YP_002141201.1 | lipoprotein                                          |
| Salmonella enterica subsp. enterica serovar Paratyphi A str. AKU_12601   | 4.10E-171 | BamD  | YP_002143194.1 | outer membrane protein assembly complex subunit YfiO |
| Salmonella enterica subsp. enterica serovar Paratyphi A str. AKU_12601   | 1.80E-041 | BamE  | YP_002143214.1 | hypothetical protein SSPA2369                        |
| Salmonella enterica subsp. enterica serovar Paratyphi A str. AKU_12601   | 4.00E-005 | BamE  | YP_002142263.1 | DNA-binding transcriptional activator OsmE           |
| Salmonella enterica subsp. enterica serovar Paratyphi A str. AKU_12601   | 0.00E+000 | Omp85 | YP_002141068.1 | outer membrane protein assembly factor YaeT          |
| Salmonella enterica subsp. enterica serovar Paratyphi A str. AKU_12601   | 1.00E-006 | Omp85 | YP_002144762.1 | hypothetical protein SSPA3928                        |
| Salmonella enterica subsp. enterica serovar Paratyphi A str. ATCC 9150   | 5.70E-214 | BamB  | YP_149676.1    | outer membrane protein assembly complex subunit YfgL |
| Salmonella enterica subsp. enterica serovar Paratyphi A str. ATCC 9150   | 5.00E-005 | BamB  | YP_149517.1    | glucose dehydrogenase                                |
| Salmonella enterica subsp. enterica serovar Paratyphi A str. ATCC 9150   | 4.20E-226 | BamC  | YP_149705.1    | lipoprotein                                          |
| Salmonella enterica subsp. enterica serovar Paratyphi A str. ATCC 9150   | 4.10E-171 | BamD  | YP_151705.1    | outer membrane protein assembly complex subunit YfiO |
| Salmonella enterica subsp. enterica serovar Paratyphi A str. ATCC 9150   | 9.40E-068 | BamE  | YP_151725.2    | hypothetical protein SPA2544                         |
| Salmonella enterica subsp. enterica serovar Paratyphi A str. ATCC 9150   | 4.00E-005 | BamE  | YP_150778.1    | DNA-binding transcriptional activator OsmE           |
| Salmonella enterica subsp. enterica serovar Paratyphi A str. ATCC 9150   | 0.00E+000 | Omp85 | YP_149572.1    | outer membrane protein assembly factor YaeT          |
| Salmonella enterica subsp. enterica serovar Paratyphi A str. ATCC 9150   | 8.30E-007 | Omp85 | YP_153277.1    | hypothetical protein SPA4229                         |
| Salmonella enterica subsp. enterica serovar Paratyphi C strain RKS4594   | 4.50E-211 | BamB  | YP_002636741.1 | outer membrane protein assembly complex subunit YfgL |
| Salmonella enterica subsp. enterica serovar Paratyphi C strain RKS4594   | 8.20E-005 | BamB  | YP_002635813.1 | glucose dehydrogenase                                |
| Salmonella enterica subsp. enterica serovar Paratyphi C strain RKS4594   | 1.70E-224 | BamC  | YP_002636778.1 | lipoprotein                                          |
| Salmonella enterica subsp. enterica serovar Paratyphi C strain RKS4594   | 4.10E-171 | BamD  | YP_002638314.1 | outer membrane protein assembly complex subunit YfiO |
| Salmonella enterica subsp. enterica serovar Paratyphi C strain RKS4594   | 5.10E-069 | BamE  | YP_002638334.1 | hypothetical protein SPC_2795                        |
| Salmonella enterica subsp. enterica serovar Paratyphi C strain RKS4594   | 4.00E-005 | BamE  | YP_002637972.1 | DNA-binding transcriptional activator OsmE           |
| Salmonella enterica subsp. enterica serovar Paratyphi C strain RKS4594   | 0.00E+000 | Omp85 | YP_002635870.1 | outer membrane protein assembly factor YaeT          |
| Salmonella enterica subsp. enterica serovar Paratyphi C strain RKS4594   | 7.70E-007 | Omp85 | YP_002640051.1 | hypothetical protein SPC_4560                        |
| Salmonella enterica subsp. enterica serovar Schwarzengrund str. CVM19633 | 8.90E-214 | BamB  | YP_002115582.1 | outer membrane protein assembly complex subunit YfgL |
| Salmonella enterica subsp. enterica serovar Schwarzengrund str. CVM19633 | 9.60E-005 | BamB  | YP_002113188.1 | quinoprotein glucose dehydrogenase                   |
| Salmonella enterica subsp. enterica serovar Schwarzengrund str. CVM19633 | 3.60E-227 | BamC  | YP_002115551.1 | lipoprotein                                          |
| Salmonella enterica subsp. enterica serovar Schwarzengrund str. CVM19633 | 1.80E-169 | BamD  | YP_002115674.1 | outer membrane protein assembly complex subunit YfiO |
| Salmonella enterica subsp. enterica serovar Schwarzengrund str. CVM19633 | 5.10E-069 | BamE  | YP_002115694.1 | hypothetical protein SeSA_A2880                      |
| Salmonella enterica subsp. enterica serovar Schwarzengrund str. CVM19633 | 4.00E-005 | BamE  | YP_002114331.1 | DNA-binding transcriptional activator OsmE           |
| Salmonella enterica subsp. enterica serovar Schwarzengrund str. CVM19633 | 0.00E+000 | Omp85 | YP_002113247.1 | outer membrane protein assembly factor YaeT          |
| Salmonella enterica subsp. enterica serovar Schwarzengrund str. CVM19633 | 9.00E-007 | Omp85 | YP_002117349.1 | outer membrane protein, OMP85 family protein         |

## gamma\_e-5

|                                                                  |           |       |                |                                                      |
|------------------------------------------------------------------|-----------|-------|----------------|------------------------------------------------------|
| Salmonella enterica subsp. enterica serovar Typhi str. CT18      | 5.70E-214 | BamB  | NP_457052.1    | outer membrane protein assembly complex subunit YfgL |
| Salmonella enterica subsp. enterica serovar Typhi str. CT18      | 9.10E-005 | BamB  | NP_454782.1    | glucose dehydrogenase                                |
| Salmonella enterica subsp. enterica serovar Typhi str. CT18      | 3.00E-226 | BamC  | NP_457022.1    | lipoprotein                                          |
| Salmonella enterica subsp. enterica serovar Typhi str. CT18      | 3.00E-171 | BamD  | NP_457134.1    | outer membrane protein assembly complex subunit YfiO |
| Salmonella enterica subsp. enterica serovar Typhi str. CT18      | 5.10E-069 | BamE  | NP_457154.1    | hypothetical protein STY2871                         |
| Salmonella enterica subsp. enterica serovar Typhi str. CT18      | 4.00E-005 | BamE  | NP_456201.1    | DNA-binding transcriptional activator OsmE           |
| Salmonella enterica subsp. enterica serovar Typhi str. CT18      | 0.00E+000 | Omp85 | NP_454831.1    | outer membrane protein assembly factor YaeT          |
| Salmonella enterica subsp. enterica serovar Typhi str. CT18      | 9.60E-007 | Omp85 | NP_458846.1    | hypothetical protein STY4768                         |
| Salmonella enterica subsp. enterica serovar Typhi str. Ty2       | 5.70E-214 | BamB  | NP_804210.1    | outer membrane protein assembly complex subunit YfgL |
| Salmonella enterica subsp. enterica serovar Typhi str. Ty2       | 9.10E-005 | BamB  | NP_804057.1    | glucose dehydrogenase                                |
| Salmonella enterica subsp. enterica serovar Typhi str. Ty2       | 1.90E-227 | BamC  | NP_804240.1    | lipoprotein                                          |
| Salmonella enterica subsp. enterica serovar Typhi str. Ty2       | 3.00E-171 | BamD  | NP_806330.1    | outer membrane protein assembly complex subunit YfiO |
| Salmonella enterica subsp. enterica serovar Typhi str. Ty2       | 5.10E-069 | BamE  | NP_806350.1    | hypothetical protein t2639                           |
| Salmonella enterica subsp. enterica serovar Typhi str. Ty2       | 4.00E-005 | BamE  | NP_804997.1    | DNA-binding transcriptional activator OsmE           |
| Salmonella enterica subsp. enterica serovar Typhi str. Ty2       | 0.00E+000 | Omp85 | NP_804106.1    | outer membrane protein assembly factor YaeT          |
| Salmonella enterica subsp. enterica serovar Typhi str. Ty2       | 9.60E-007 | Omp85 | NP_808050.1    | hypothetical protein t4463                           |
| Salmonella enterica subsp. enterica serovar Typhimurium str. LT2 | 1.20E-213 | BamB  | NP_461455.1    | outer membrane protein assembly complex subunit YfgL |
| Salmonella enterica subsp. enterica serovar Typhimurium str. LT2 | 8.90E-005 | BamB  | NP_459174.1    | glucose dehydrogenase                                |
| Salmonella enterica subsp. enterica serovar Typhimurium str. LT2 | 3.60E-227 | BamC  | NP_461423.1    | lipoprotein                                          |
| Salmonella enterica subsp. enterica serovar Typhimurium str. LT2 | 4.10E-171 | BamD  | NP_461594.1    | outer membrane protein assembly complex subunit YfiO |
| Salmonella enterica subsp. enterica serovar Typhimurium str. LT2 | 5.10E-069 | BamE  | NP_461615.1    | hypothetical protein STM2685                         |
| Salmonella enterica subsp. enterica serovar Typhimurium str. LT2 | 4.00E-005 | BamE  | NP_460277.1    | DNA-binding transcriptional activator OsmE           |
| Salmonella enterica subsp. enterica serovar Typhimurium str. LT2 | 0.00E+000 | Omp85 | NP_459229.1    | outer membrane protein assembly factor YaeT          |
| Salmonella enterica subsp. enterica serovar Typhimurium str. LT2 | 9.60E-007 | Omp85 | NP_463270.1    | outer membrane protein                               |
| Serratia proteamaculans 568                                      | 3.70E-193 | BamB  | YP_001479830.1 | outer membrane protein assembly complex subunit YfgL |
| Serratia proteamaculans 568                                      | 8.10E-005 | BamB  | YP_001481070.1 | Pyrolo-quinoline quinone                             |
| Serratia proteamaculans 568                                      | 7.50E-213 | BamC  | YP_001479734.1 | lipoprotein                                          |
| Serratia proteamaculans 568                                      | 6.10E-155 | BamD  | YP_001477117.1 | outer membrane protein assembly complex subunit YfiO |
| Serratia proteamaculans 568                                      | 4.90E-063 | BamE  | YP_001479911.1 | hypothetical protein Spro_3687                       |
| Serratia proteamaculans 568                                      | 1.20E-006 | BamE  | YP_001479484.1 | DNA-binding transcriptional activator OsmE           |
| Serratia proteamaculans 568                                      | 1.80E-005 | BamE  | YP_001480311.1 | hypothetical protein Spro_4088                       |
| Serratia proteamaculans 568                                      | 2.40E-005 | BamE  | YP_001476573.1 | hypothetical protein Spro_0335                       |
| Serratia proteamaculans 568                                      | 2.60E-005 | BamE  | YP_001480393.1 | hypothetical protein Spro_4171                       |
| Serratia proteamaculans 568                                      | 6.40E-005 | BamE  | YP_001481034.1 | hypothetical protein Spro_4813                       |
| Serratia proteamaculans 568                                      | 0.00E+000 | Omp85 | YP_001480006.1 | outer membrane protein assembly factor YaeT          |
| Serratia proteamaculans 568                                      | 3.30E-007 | Omp85 | YP_001476695.1 | surface antigen (D15)                                |
| Serratia sp. AS12                                                | 1.50E-195 | BamB  | YP_004502221.1 | outer membrane assembly lipoprotein YfgL             |

## gamma\_e-5

|                             |           |       |                |                                                                                   |
|-----------------------------|-----------|-------|----------------|-----------------------------------------------------------------------------------|
| Serratia sp. AS12           | 9.00E-005 | BamB  | YP_004500827.1 | membrane-bound PQQ-dependent<br>glucose/quinolate/shikimate family dehydrogenase, |
| Serratia sp. AS12           | 1.60E-214 | BamC  | YP_004502119.1 | NlpBDapX family lipoprotein                                                       |
| Serratia sp. AS12           | 2.40E-152 | BamD  | YP_004499269.1 | outer membrane assembly lipoprotein YfiO                                          |
| Serratia sp. AS12           | 2.80E-063 | BamE  | YP_004502288.1 | SmpA/OmlA domain-containing protein                                               |
| Serratia sp. AS12           | 1.40E-006 | BamE  | YP_004501872.1 | SmpA/OmlA domain-containing protein                                               |
| Serratia sp. AS12           | 6.80E-005 | BamE  | YP_004498763.1 | integrating conjugative element protein                                           |
| Serratia sp. AS12           | 0.00E+000 | Omp85 | YP_004502380.1 | Outer membrane protein assembly factor yaeT                                       |
| Serratia sp. AS12           | 7.10E-282 | Omp85 | YP_004500840.1 | outer membrane protein assembly complex, YaeT protein                             |
| Serratia sp. AS12           | 3.90E-007 | Omp85 | YP_004498864.1 | surface antigen (D15)                                                             |
| Serratia sp. AS9            | 1.50E-195 | BamB  | YP_004507173.1 | outer membrane assembly lipoprotein YfgL                                          |
| Serratia sp. AS9            | 9.00E-005 | BamB  | YP_004505780.1 | membrane-bound PQQ-dependent dehydrogenase                                        |
| Serratia sp. AS9            | 1.60E-214 | BamC  | YP_004507071.1 | NlpBDapX family lipoprotein                                                       |
| Serratia sp. AS9            | 2.40E-152 | BamD  | YP_004504221.1 | outer membrane assembly lipoprotein YfiO                                          |
| Serratia sp. AS9            | 2.80E-063 | BamE  | YP_004507240.1 | SmpA/OmlA domain-containing protein                                               |
| Serratia sp. AS9            | 1.40E-006 | BamE  | YP_004506824.1 | SmpA/OmlA domain-containing protein                                               |
| Serratia sp. AS9            | 6.80E-005 | BamE  | YP_004503715.1 | integrating conjugative element protein                                           |
| Serratia sp. AS9            | 0.00E+000 | Omp85 | YP_004507332.1 | Outer membrane protein assembly factor yaeT                                       |
| Serratia sp. AS9            | 7.10E-282 | Omp85 | YP_004505793.1 | outer membrane protein assembly complex, YaeT protein                             |
| Serratia sp. AS9            | 3.90E-007 | Omp85 | YP_004503816.1 | surface antigen (D15)                                                             |
| Shewanella amazonensis SB2B | 4.80E-202 | BamB  | YP_928236.1    | outer membrane protein assembly complex subunit YfgL                              |
| Shewanella amazonensis SB2B | 2.00E-039 | BamC  | YP_927782.1    | lipoprotein-34 NlpB                                                               |
| Shewanella amazonensis SB2B | 9.90E-145 | BamD  | YP_928478.1    | putative lipoprotein                                                              |
| Shewanella amazonensis SB2B | 1.10E-036 | BamE  | YP_928259.1    | small protein A                                                                   |
| Shewanella amazonensis SB2B | 4.40E-229 | Omp85 | YP_927024.1    | surface antigen                                                                   |
| Shewanella amazonensis SB2B | 1.90E-034 | Omp85 | YP_927493.1    | hypothetical protein Sama_1616                                                    |
| Shewanella baltica OS155    | 1.80E-235 | BamB  | YP_001051338.1 | outer membrane protein assembly complex subunit YfgL                              |
| Shewanella baltica OS155    | 2.30E-029 | BamC  | YP_001050913.1 | NlpB/DapX family lipoprotein                                                      |
| Shewanella baltica OS155    | 1.40E-163 | BamD  | YP_001049409.1 | putative lipoprotein                                                              |
| Shewanella baltica OS155    | 9.00E-005 | BamD  | YP_001049159.1 | peptidase S45, penicillin amidase                                                 |
| Shewanella baltica OS155    | 1.00E-036 | BamE  | YP_001049697.1 | SmpA/OmlA domain-containing protein                                               |
| Shewanella baltica OS155    | 5.40E-215 | Omp85 | YP_001049845.1 | surface antigen (D15)                                                             |
| Shewanella baltica OS155    | 5.30E-069 | Omp85 | YP_001050278.1 | surface antigen (D15)                                                             |
| Shewanella baltica OS185    | 3.50E-235 | BamB  | YP_001367196.1 | outer membrane protein assembly complex subunit YfgL                              |
| Shewanella baltica OS185    | 1.00E-029 | BamC  | YP_001366787.1 | NlpB/DapX family lipoprotein                                                      |
| Shewanella baltica OS185    | 1.40E-163 | BamD  | YP_001365300.1 | putative lipoprotein                                                              |
| Shewanella baltica OS185    | 9.00E-005 | BamD  | YP_001367743.1 | peptidase S45 penicillin amidase                                                  |
| Shewanella baltica OS185    | 1.00E-036 | BamE  | YP_001365514.1 | SmpA/OmlA domain-containing protein                                               |

## gamma\_e-5

|                                    |           |       |                |                                                       |
|------------------------------------|-----------|-------|----------------|-------------------------------------------------------|
| Shewanella baltica OS185           | 1.10E-220 | Omp85 | YP_001365666.1 | surface antigen (D15)                                 |
| Shewanella baltica OS185           | 2.10E-069 | Omp85 | YP_001366135.1 | surface antigen (D15)                                 |
| Shewanella baltica OS195           | 3.90E-235 | BamB  | YP_001555567.1 | outer membrane protein assembly complex subunit YfgL  |
| Shewanella baltica OS195           | 2.40E-032 | BamC  | YP_001555094.1 | NlpB/DapX family lipoprotein                          |
| Shewanella baltica OS195           | 1.40E-163 | BamD  | YP_001553554.1 | putative lipoprotein                                  |
| Shewanella baltica OS195           | 1.00E-036 | BamE  | YP_001553772.1 | SmpA/OmlA domain-containing protein                   |
| Shewanella baltica OS195           | 1.10E-220 | Omp85 | YP_001553922.1 | surface antigen (D15)                                 |
| Shewanella baltica OS195           | 3.80E-068 | Omp85 | YP_001554367.1 | surface antigen (D15)                                 |
| Shewanella baltica OS223           | 3.50E-235 | BamB  | YP_002357307.1 | outer membrane protein assembly complex subunit YfgL  |
| Shewanella baltica OS223           | 1.00E-029 | BamC  | YP_002357721.1 | NlpBDapX family lipoprotein                           |
| Shewanella baltica OS223           | 1.40E-163 | BamD  | YP_002359180.1 | outer membrane assembly lipoprotein YfiO              |
| Shewanella baltica OS223           | 1.00E-036 | BamE  | YP_002358957.1 | SmpA/OmlA domain-containing protein                   |
| Shewanella baltica OS223           | 2.50E-221 | Omp85 | YP_002358803.1 | outer membrane protein assembly complex, YaeT protein |
| Shewanella baltica OS223           | 2.10E-069 | Omp85 | YP_002358308.1 | surface antigen (D15)                                 |
| Shewanella denitrificans OS217     | 7.10E-188 | BamB  | YP_562268.1    | outer membrane protein assembly complex subunit YfgL  |
| Shewanella denitrificans OS217     | 3.30E-019 | BamC  | YP_562743.1    | NlpBDapX lipoprotein                                  |
| Shewanella denitrificans OS217     | 2.80E-154 | BamD  | YP_563866.1    | putative lipoprotein                                  |
| Shewanella denitrificans OS217     | 7.30E-030 | BamE  | YP_562251.1    | SmpA/OmlA                                             |
| Shewanella denitrificans OS217     | 5.30E-006 | BamE  | YP_562525.1    | hypothetical protein Sden_1517                        |
| Shewanella denitrificans OS217     | 1.20E-202 | Omp85 | YP_562570.1    | surface antigen (D15)                                 |
| Shewanella denitrificans OS217     | 1.30E-053 | Omp85 | YP_562513.1    | surface antigen (D15)                                 |
| Shewanella frigidimarina NCIMB 400 | 2.80E-189 | BamB  | YP_749810.1    | outer membrane protein assembly complex subunit YfgL  |
| Shewanella frigidimarina NCIMB 400 | 1.20E-030 | BamC  | YP_750551.1    | NlpB/DapX family lipoprotein                          |
| Shewanella frigidimarina NCIMB 400 | 7.60E-157 | BamD  | YP_749364.1    | putative lipoprotein                                  |
| Shewanella frigidimarina NCIMB 400 | 1.20E-036 | BamE  | YP_749788.1    | SmpA/OmlA domain-containing protein                   |
| Shewanella frigidimarina NCIMB 400 | 1.10E-209 | Omp85 | YP_749969.1    | surface antigen (D15)                                 |
| Shewanella frigidimarina NCIMB 400 | 2.60E-170 | Omp85 | YP_750134.1    | surface antigen (D15)                                 |
| Shewanella halifaxensis HAW-EB4    | 3.90E-199 | BamB  | YP_001673596.1 | outer membrane protein assembly complex subunit YfgL  |
| Shewanella halifaxensis HAW-EB4    | 7.10E-018 | BamC  | YP_001674538.1 | NlpB/DapX family lipoprotein                          |
| Shewanella halifaxensis HAW-EB4    | 2.20E-148 | BamD  | YP_001675455.1 | putative lipoprotein                                  |
| Shewanella halifaxensis HAW-EB4    | 1.90E-005 | BamD  | YP_001673591.1 | type IV pilus biogenesis/stability protein PilW       |
| Shewanella halifaxensis HAW-EB4    | 1.00E-037 | BamE  | YP_001673574.1 | SmpA/OmlA domain-containing protein                   |
| Shewanella halifaxensis HAW-EB4    | 1.30E-220 | Omp85 | YP_001675181.1 | surface antigen (D15)                                 |
| Shewanella halifaxensis HAW-EB4    | 3.50E-041 | Omp85 | YP_001674068.1 | surface antigen (D15)                                 |
| Shewanella loihica PV-4            | 1.70E-197 | BamB  | YP_001093422.1 | outer membrane protein assembly complex subunit YfgL  |
| Shewanella loihica PV-4            | 1.70E-019 | BamC  | YP_001093974.1 | NlpB/DapX family lipoprotein                          |
| Shewanella loihica PV-4            | 1.50E-150 | BamD  | YP_001095076.1 | putative lipoprotein                                  |
| Shewanella loihica PV-4            | 1.70E-035 | BamE  | YP_001093400.1 | SmpA/OmlA domain-containing protein                   |

## gamma\_e-5

|                                 |           |       |                |                                                       |
|---------------------------------|-----------|-------|----------------|-------------------------------------------------------|
| Shewanella loihica PV-4         | 1.20E-216 | Omp85 | YP_001094752.1 | surface antigen (D15)                                 |
| Shewanella loihica PV-4         | 3.80E-049 | Omp85 | YP_001094297.1 | surface antigen (D15)                                 |
| Shewanella oneidensis MR-1      | 4.50E-225 | BamB  | NP_718863.1    | outer membrane protein assembly complex subunit YfgL  |
| Shewanella oneidensis MR-1      | 1.20E-032 | BamC  | NP_717488.1    | lipoprotein-34 NlpB                                   |
| Shewanella oneidensis MR-1      | 2.10E-173 | BamD  | NP_719124.1    | hypothetical protein SO_3580                          |
| Shewanella oneidensis MR-1      | 1.50E-036 | BamE  | NP_717092.1    | small protein A                                       |
| Shewanella oneidensis MR-1      | 8.30E-214 | Omp85 | NP_717248.1    | surface antigen                                       |
| Shewanella oneidensis MR-1      | 6.50E-067 | Omp85 | NP_717717.1    | hypothetical protein SO_2114                          |
| Shewanella pealeana ATCC 700345 | 1.20E-198 | BamB  | YP_001501170.1 | outer membrane protein assembly complex subunit YfgL  |
| Shewanella pealeana ATCC 700345 | 1.80E-018 | BamC  | YP_001501838.1 | NlpB/DapX family lipoprotein                          |
| Shewanella pealeana ATCC 700345 | 8.10E-149 | BamD  | YP_001503018.1 | putative lipoprotein                                  |
| Shewanella pealeana ATCC 700345 | 2.00E-005 | BamD  | YP_001501165.1 | type IV pilus biogenesis/stability protein PilW       |
| Shewanella pealeana ATCC 700345 | 4.60E-005 | BamD  | YP_001503044.1 | diguanylate cyclase                                   |
| Shewanella pealeana ATCC 700345 | 2.80E-038 | BamE  | YP_001501147.1 | SmpA/OmlA domain-containing protein                   |
| Shewanella pealeana ATCC 700345 | 1.50E-222 | Omp85 | YP_001502730.1 | surface antigen (D15)                                 |
| Shewanella pealeana ATCC 700345 | 7.10E-038 | Omp85 | YP_001502291.1 | surface antigen (D15)                                 |
| Shewanella piezotolerans WP3    | 9.60E-203 | BamB  | YP_002310827.1 | outer membrane protein assembly complex subunit YfgL  |
| Shewanella piezotolerans WP3    | 3.90E-018 | BamC  | YP_002312051.1 | lipoprotein-34 NlpB                                   |
| Shewanella piezotolerans WP3    | 4.30E-146 | BamD  | YP_002313200.1 | hypothetical protein swp_3941                         |
| Shewanella piezotolerans WP3    | 3.50E-035 | BamE  | YP_002310805.1 | SmpA/OmlA                                             |
| Shewanella piezotolerans WP3    | 7.00E-005 | BamE  | YP_002314049.1 | polysaccharide deacetylase                            |
| Shewanella piezotolerans WP3    | 9.60E-005 | BamE  | YP_002309463.1 | hypothetical protein swp_0028                         |
| Shewanella piezotolerans WP3    | 2.00E-222 | Omp85 | YP_002312794.1 | surface antigen                                       |
| Shewanella piezotolerans WP3    | 1.50E-039 | Omp85 | YP_002312096.1 | Surface antigen (D15):Surface antigen variable number |
| Shewanella putrefaciens CN-32   | 3.30E-227 | BamB  | YP_001184169.1 | outer membrane protein assembly complex subunit YfgL  |
| Shewanella putrefaciens CN-32   | 6.50E-030 | BamC  | YP_001183227.1 | NlpB/DapX family lipoprotein                          |
| Shewanella putrefaciens CN-32   | 3.70E-168 | BamD  | YP_001182549.1 | putative lipoprotein                                  |
| Shewanella putrefaciens CN-32   | 2.20E-038 | BamE  | YP_001182759.1 | SmpA/OmlA domain-containing protein                   |
| Shewanella putrefaciens CN-32   | 1.30E-224 | Omp85 | YP_001182883.1 | surface antigen (D15)                                 |
| Shewanella putrefaciens CN-32   | 6.30E-069 | Omp85 | YP_001183419.1 | surface antigen (D15)                                 |
| Shewanella sediminis HAW-EB3    | 3.00E-200 | BamB  | YP_001473174.1 | outer membrane protein assembly complex subunit YfgL  |
| Shewanella sediminis HAW-EB3    | 1.30E-022 | BamC  | YP_001474166.1 | NlpB/DapX family lipoprotein                          |
| Shewanella sediminis HAW-EB3    | 5.00E-147 | BamD  | YP_001475232.1 | putative lipoprotein                                  |
| Shewanella sediminis HAW-EB3    | 4.00E-037 | BamE  | YP_001473149.1 | SmpA/OmlA domain-containing protein                   |
| Shewanella sediminis HAW-EB3    | 2.70E-214 | Omp85 | YP_001474885.1 | surface antigen (D15)                                 |
| Shewanella sp. ANA-3            | 8.80E-229 | BamB  | YP_868873.1    | outer membrane protein assembly complex subunit YfgL  |
| Shewanella sp. ANA-3            | 2.10E-028 | BamC  | YP_869296.1    | NlpB/DapX family lipoprotein                          |
| Shewanella sp. ANA-3            | 6.30E-172 | BamD  | YP_870802.1    | putative lipoprotein                                  |

## gamma\_e-5

|                              |           |       |                |                                                       |
|------------------------------|-----------|-------|----------------|-------------------------------------------------------|
| Shewanella sp. ANA-3         | 8.70E-037 | BamE  | YP_870581.1    | SmpA/OmlA domain-containing protein                   |
| Shewanella sp. ANA-3         | 8.30E-218 | Omp85 | YP_870440.1    | surface antigen (D15)                                 |
| Shewanella sp. ANA-3         | 1.10E-055 | Omp85 | YP_869531.1    | surface antigen (D15)                                 |
| Shewanella sp. MR-4          | 4.90E-227 | BamB  | YP_733368.1    | outer membrane protein assembly complex subunit YfgL  |
| Shewanella sp. MR-4          | 2.50E-028 | BamC  | YP_734467.1    | NlpB/DapX family lipoprotein                          |
| Shewanella sp. MR-4          | 6.40E-171 | BamD  | YP_735122.1    | putative lipoprotein                                  |
| Shewanella sp. MR-4          | 1.50E-036 | BamE  | YP_734901.1    | SmpA/OmlA domain-containing protein                   |
| Shewanella sp. MR-4          | 2.20E-217 | Omp85 | YP_734761.1    | surface antigen (D15)                                 |
| Shewanella sp. MR-4          | 3.00E-052 | Omp85 | YP_733967.1    | surface antigen (D15)                                 |
| Shewanella sp. MR-7          | 2.80E-225 | BamB  | YP_737358.1    | outer membrane protein assembly complex subunit YfgL  |
| Shewanella sp. MR-7          | 2.20E-027 | BamC  | YP_738453.1    | NlpB/DapX family lipoprotein                          |
| Shewanella sp. MR-7          | 6.40E-171 | BamD  | YP_739116.1    | putative lipoprotein                                  |
| Shewanella sp. MR-7          | 1.50E-036 | BamE  | YP_738892.1    | SmpA/OmlA domain-containing protein                   |
| Shewanella sp. MR-7          | 2.20E-217 | Omp85 | YP_738742.1    | surface antigen (D15)                                 |
| Shewanella sp. MR-7          | 1.90E-052 | Omp85 | YP_738186.1    | surface antigen (D15)                                 |
| Shewanella sp. W3-18-1       | 3.30E-227 | BamB  | YP_962755.1    | outer membrane protein assembly complex subunit YfgL  |
| Shewanella sp. W3-18-1       | 6.50E-030 | BamC  | YP_963700.1    | NlpB/DapX family lipoprotein                          |
| Shewanella sp. W3-18-1       | 3.70E-168 | BamD  | YP_964513.1    | putative lipoprotein                                  |
| Shewanella sp. W3-18-1       | 2.20E-038 | BamE  | YP_964244.1    | SmpA/OmlA domain-containing protein                   |
| Shewanella sp. W3-18-1       | 1.30E-224 | Omp85 | YP_964118.1    | surface antigen (D15)                                 |
| Shewanella sp. W3-18-1       | 6.30E-069 | Omp85 | YP_963493.1    | surface antigen (D15)                                 |
| Shewanella violacea DSS12    | 4.50E-201 | BamB  | YP_003556127.1 | PQQ enzyme repeat domain-containing protein           |
| Shewanella violacea DSS12    | 4.70E-024 | BamC  | YP_003556667.1 | lipoprotein-34 NlpB                                   |
| Shewanella violacea DSS12    | 1.60E-147 | BamD  | YP_003558176.1 | hypothetical protein SVI_3427                         |
| Shewanella violacea DSS12    | 2.90E-040 | BamE  | YP_003556106.1 | small protein A                                       |
| Shewanella violacea DSS12    | 5.60E-219 | Omp85 | YP_003555990.1 | surface antigen                                       |
| Shewanella violacea DSS12    | 4.20E-027 | Omp85 | YP_003557206.1 | surface antigen                                       |
| Shewanella woodyi ATCC 51908 | 8.10E-197 | BamB  | YP_001759930.1 | outer membrane protein assembly complex subunit YfgL  |
| Shewanella woodyi ATCC 51908 | 1.50E-008 | BamB  | YP_001760631.1 | methanol/ethanol family PQQ-dependent dehydrogenase   |
| Shewanella woodyi ATCC 51908 | 9.10E-019 | BamC  | YP_001760555.1 | NlpB/DapX family lipoprotein                          |
| Shewanella woodyi ATCC 51908 | 9.70E-148 | BamD  | YP_001762078.1 | putative lipoprotein                                  |
| Shewanella woodyi ATCC 51908 | 7.80E-006 | BamD  | YP_001759002.1 | TPR repeat-containing protein                         |
| Shewanella woodyi ATCC 51908 | 4.20E-040 | BamE  | YP_001759906.1 | SmpA/OmlA domain-containing protein                   |
| Shewanella woodyi ATCC 51908 | 1.30E-215 | Omp85 | YP_001761638.1 | outer membrane protein assembly complex, YaeT protein |
| Shewanella woodyi ATCC 51908 | 1.40E-041 | Omp85 | YP_001761058.1 | surface antigen (D15)                                 |
| Shigella boydii CDC 3083-94  | 1.00E-222 | BamB  | YP_001881303.1 | outer membrane protein assembly complex subunit YfgL  |
| Shigella boydii CDC 3083-94  | 1.20E-232 | BamC  | YP_001881269.1 | lipoprotein                                           |
| Shigella boydii CDC 3083-94  | 1.70E-174 | BamD  | YP_001881383.1 | outer membrane protein assembly complex subunit YfiO  |

## gamma\_e-5

|                                 |           |       |                |                                                      |
|---------------------------------|-----------|-------|----------------|------------------------------------------------------|
| Shigella boydii CDC 3083-94     | 1.70E-067 | BamE  | YP_001881407.1 | hypothetical protein SbBS512_E3006                   |
| Shigella boydii CDC 3083-94     | 2.30E-005 | BamE  | YP_001880531.1 | DNA-binding transcriptional activator OsmE           |
| Shigella boydii CDC 3083-94     | 0.00E+000 | Omp85 | YP_001878979.1 | outer membrane protein assembly factor YaeT          |
| Shigella boydii CDC 3083-94     | 9.30E-007 | Omp85 | YP_001882992.1 | outer membrane protein, OMP85 family                 |
| Shigella boydii Sb227           | 5.10E-224 | BamB  | YP_408908.1    | outer membrane protein assembly complex subunit YfgL |
| Shigella boydii Sb227           | 1.30E-005 | BamB  | YP_406674.1    | glucose dehydrogenase                                |
| Shigella boydii Sb227           | 4.70E-233 | BamC  | YP_408872.1    | lipoprotein                                          |
| Shigella boydii Sb227           | 4.30E-173 | BamD  | YP_408995.1    | outer membrane protein assembly complex subunit YfiO |
| Shigella boydii Sb227           | 1.30E-007 | BamE  | YP_409107.1    | small membrane protein A                             |
| Shigella boydii Sb227           | 2.30E-005 | BamE  | YP_407805.1    | DNA-binding transcriptional activator OsmE           |
| Shigella boydii Sb227           | 0.00E+000 | Omp85 | YP_406723.1    | outer membrane protein assembly factor YaeT          |
| Shigella boydii Sb227           | 9.00E-007 | Omp85 | YP_410476.1    | hypothetical protein SBO_4223                        |
| Shigella dysenteriae Sd197      | 6.60E-225 | BamB  | YP_404246.1    | outer membrane protein assembly complex subunit YfgL |
| Shigella dysenteriae Sd197      | 9.10E-237 | BamC  | YP_404208.1    | lipoprotein                                          |
| Shigella dysenteriae Sd197      | 8.70E-175 | BamD  | YP_404368.1    | outer membrane protein assembly complex subunit YfiO |
| Shigella dysenteriae Sd197      | 5.80E-068 | BamE  | YP_404324.2    | hypothetical protein SDY_2790                        |
| Shigella dysenteriae Sd197      | 2.30E-005 | BamE  | YP_403168.1    | DNA-binding transcriptional activator OsmE           |
| Shigella dysenteriae Sd197      | 0.00E+000 | Omp85 | YP_401914.1    | outer membrane protein assembly factor YaeT          |
| Shigella dysenteriae Sd197      | 1.30E-006 | Omp85 | YP_405829.1    | hypothetical protein SDY_4457                        |
| Shigella flexneri 2a str. 2457T | 5.10E-224 | BamB  | NP_838075.1    | outer membrane protein assembly complex subunit YfgL |
| Shigella flexneri 2a str. 2457T | 7.80E-006 | BamB  | NP_835860.1    | glucose dehydrogenase                                |
| Shigella flexneri 2a str. 2457T | 8.10E-238 | BamC  | NP_838027.1    | lipoprotein                                          |
| Shigella flexneri 2a str. 2457T | 4.30E-174 | BamD  | NP_838161.1    | outer membrane protein assembly complex subunit YfiO |
| Shigella flexneri 2a str. 2457T | 1.30E-007 | BamE  | NP_838186.1    | small membrane protein A                             |
| Shigella flexneri 2a str. 2457T | 2.30E-005 | BamE  | NP_837165.1    | DNA-binding transcriptional activator OsmE           |
| Shigella flexneri 2a str. 2457T | 0.00E+000 | Omp85 | NP_835905.1    | outer membrane protein assembly factor YaeT          |
| Shigella flexneri 2a str. 2457T | 1.00E-006 | Omp85 | NP_839659.1    | hypothetical protein S4531                           |
| Shigella flexneri 5 str. 8401   | 6.60E-224 | BamB  | YP_689963.1    | outer membrane protein assembly complex subunit YfgL |
| Shigella flexneri 5 str. 8401   | 7.80E-006 | BamB  | YP_687705.1    | glucose dehydrogenase                                |
| Shigella flexneri 5 str. 8401   | 8.10E-238 | BamC  | YP_689930.1    | lipoprotein                                          |
| Shigella flexneri 5 str. 8401   | 1.60E-173 | BamD  | YP_690054.1    | outer membrane protein assembly complex subunit YfiO |
| Shigella flexneri 5 str. 8401   | 5.80E-068 | BamE  | YP_690236.2    | hypothetical protein SFV_2854                        |
| Shigella flexneri 5 str. 8401   | 2.30E-005 | BamE  | YP_688973.1    | DNA-binding transcriptional activator OsmE           |
| Shigella flexneri 5 str. 8401   | 0.00E+000 | Omp85 | YP_687749.1    | outer membrane protein assembly factor YaeT          |
| Shigella flexneri 5 str. 8401   | 1.30E-006 | Omp85 | YP_691554.1    | hypothetical protein SFV_4268                        |
| Shigella sonnei Ss046           | 6.60E-225 | BamB  | YP_311457.1    | outer membrane protein assembly complex subunit YfgL |
| Shigella sonnei Ss046           | 8.30E-006 | BamB  | YP_309161.1    | glucose dehydrogenase                                |
| Shigella sonnei Ss046           | 8.10E-238 | BamC  | YP_311422.1    | lipoprotein                                          |

## gamma\_e-5

|                                       |           |       |                |                                                       |
|---------------------------------------|-----------|-------|----------------|-------------------------------------------------------|
| Shigella sonnei Ss046                 | 1.70E-174 | BamD  | YP_311573.1    | outer membrane protein assembly complex subunit YfiO  |
| Shigella sonnei Ss046                 | 5.80E-068 | BamE  | YP_311625.2    | hypothetical protein SSON_2773                        |
| Shigella sonnei Ss046                 | 2.30E-005 | BamE  | YP_310361.1    | DNA-binding transcriptional activator OsmE            |
| Shigella sonnei Ss046                 | 0.00E+000 | Omp85 | YP_309216.1    | outer membrane protein assembly factor YaeT           |
| Shigella sonnei Ss046                 | 9.60E-007 | Omp85 | YP_313120.1    | hypothetical protein SSON_4405                        |
| Sideroxydans lithotrophicus ES-1      | 5.80E-113 | BamB  | YP_003524041.1 | outer membrane assembly lipoprotein YfgL              |
| Sideroxydans lithotrophicus ES-1      | 1.20E-099 | BamD  | YP_003524654.1 | outer membrane assembly lipoprotein YfiO              |
| Sideroxydans lithotrophicus ES-1      | 1.40E-020 | BamE  | YP_003523675.1 | SmpA/OmlA domain protein                              |
| Sideroxydans lithotrophicus ES-1      | 3.00E-212 | Omp85 | YP_003524263.1 | outer membrane protein assembly complex, YaeT protein |
| Sodalis glossinidius str. 'morsitans' | 5.70E-195 | BamB  | YP_455437.1    | outer membrane protein assembly complex subunit YfgL  |
| Sodalis glossinidius str. 'morsitans' | 8.10E-242 | BamC  | YP_455405.1    | lipoprotein                                           |
| Sodalis glossinidius str. 'morsitans' | 9.10E-151 | BamD  | YP_454262.1    | outer membrane protein assembly complex subunit YfiO  |
| Sodalis glossinidius str. 'morsitans' | 2.20E-058 | BamE  | YP_455481.1    | hypothetical protein SG1801                           |
| Sodalis glossinidius str. 'morsitans' | 1.60E-005 | BamE  | YP_455545.1    | DNA-binding transcriptional activator OsmE            |
| Sodalis glossinidius str. 'morsitans' | 1.90E-304 | Omp85 | YP_455615.1    | outer membrane protein assembly factor YaeT           |
| Sodalis glossinidius str. 'morsitans' | 4.10E-007 | Omp85 | YP_454032.1    | hypothetical protein SG0352                           |
| Stenotrophomonas maltophilia K279a    | 1.50E-119 | BamB  | YP_001971868.1 | putative PQQ containing lipoprotein                   |
| Stenotrophomonas maltophilia K279a    | 1.50E-071 | BamD  | YP_001973447.1 | putative competence lipoprotein                       |
| Stenotrophomonas maltophilia K279a    | 4.40E-021 | BamE  | YP_001971801.1 | putative outer membrane lipoprotein                   |
| Stenotrophomonas maltophilia K279a    | 3.90E-008 | BamE  | YP_001972039.1 | putative small protein A homolog                      |
| Stenotrophomonas maltophilia K279a    | 3.60E-005 | BamE  | YP_001972617.1 | putative OmpA family protein                          |
| Stenotrophomonas maltophilia K279a    | 3.60E-193 | Omp85 | YP_001971339.1 | putative outer membrane protein                       |
| Stenotrophomonas maltophilia K279a    | 7.00E-007 | Omp85 | YP_001974262.1 | putative surface antigen exported protein             |
| Stenotrophomonas maltophilia R551-3   | 6.20E-119 | BamB  | YP_002028049.1 | outer membrane assembly lipoprotein YfgL              |
| Stenotrophomonas maltophilia R551-3   | 8.50E-070 | BamD  | YP_002029542.1 | outer membrane assembly lipoprotein YfiO              |
| Stenotrophomonas maltophilia R551-3   | 8.20E-020 | BamE  | YP_002027981.1 | SmpA/OmlA domain-containing protein                   |
| Stenotrophomonas maltophilia R551-3   | 6.00E-005 | BamE  | YP_002028700.1 | OmpA/MotB domain-containing protein                   |
| Stenotrophomonas maltophilia R551-3   | 4.30E-185 | Omp85 | YP_002027645.1 | outer membrane protein assembly complex, YaeT protein |
| Stenotrophomonas maltophilia R551-3   | 1.40E-006 | Omp85 | YP_002030363.1 | surface antigen (D15)                                 |
| Teredinibacter turnerae T7901         | 3.60E-109 | BamB  | YP_003074042.1 | outer membrane assembly lipoprotein YfgL              |
| Teredinibacter turnerae T7901         | 1.50E-007 | BamC  | YP_003072578.1 | NlpB/DapX lipoprotein                                 |
| Teredinibacter turnerae T7901         | 3.70E-110 | BamD  | YP_003072648.1 | outer membrane assembly lipoprotein YfiO              |
| Teredinibacter turnerae T7901         | 1.10E-027 | BamE  | YP_003074657.1 | lipoprotein, SmpA/OmlA family                         |
| Teredinibacter turnerae T7901         | 4.40E-152 | Omp85 | YP_003072609.1 | outer membrane protein assembly complex, YaeT protein |
| Thioalkalimicrobium cyclicum ALM1     | 2.60E-049 | BamB  | YP_004536494.1 | outer membrane assembly lipoprotein YfgL              |
| Thioalkalimicrobium cyclicum ALM1     | 3.90E-059 | BamD  | YP_004536942.1 | outer membrane assembly lipoprotein YfiO              |
| Thioalkalimicrobium cyclicum ALM1     | 4.10E-008 | BamE  | YP_004537308.1 | SmpA/OmlA domain-containing protein                   |
| Thioalkalimicrobium cyclicum ALM1     | 1.80E-184 | Omp85 | YP_004537210.1 | outer membrane protein assembly complex, YaeT protein |



## gamma\_e-5

|                                         |           |       |                |                                                       |
|-----------------------------------------|-----------|-------|----------------|-------------------------------------------------------|
| Thioalkalimicrobium cyclicum ALM1       | 5.50E-005 | Omp85 | YP_004537407.1 | surface antigen (D15)                                 |
| Thioalkalivibrio sp. K90mix             | 1.00E-096 | BamB  | YP_003459988.1 | outer membrane assembly lipoprotein YfgL              |
| Thioalkalivibrio sp. K90mix             | 3.70E-005 | BamC  | YP_003459660.1 | lipoprotein                                           |
| Thioalkalivibrio sp. K90mix             | 2.20E-103 | BamD  | YP_003461262.1 | outer membrane assembly lipoprotein YfiO              |
| Thioalkalivibrio sp. K90mix             | 5.30E-005 | BamD  | YP_003459819.1 | tol-pal system protein YbgF                           |
| Thioalkalivibrio sp. K90mix             | 4.90E-018 | BamE  | YP_003461278.1 | SmpA/OmlA domain-containing protein                   |
| Thioalkalivibrio sp. K90mix             | 2.00E-191 | Omp85 | YP_003460729.1 | outer membrane protein assembly complex, YaeT protein |
| Thioalkalivibrio sp. K90mix             | 2.30E-007 | Omp85 | YP_003459547.1 | surface antigen (D15)                                 |
| Thioalkalivibrio sulfidophilus HL-EbGr7 | 5.40E-135 | BamB  | YP_002514113.1 | hypothetical protein Tgr7_2046                        |
| Thioalkalivibrio sulfidophilus HL-EbGr7 | 1.20E-006 | BamC  | YP_002512906.1 | NlpB/DapX family lipoprotein                          |
| Thioalkalivibrio sulfidophilus HL-EbGr7 | 1.90E-109 | BamD  | YP_002512892.1 | competence lipoprotein                                |
| Thioalkalivibrio sulfidophilus HL-EbGr7 | 1.80E-011 | BamD  | YP_002512326.1 | outer membrane assembly lipoprotein YfiO              |
| Thioalkalivibrio sulfidophilus HL-EbGr7 | 2.10E-019 | BamE  | YP_002513041.1 | outer membrane lipoprotein                            |
| Thioalkalivibrio sulfidophilus HL-EbGr7 | 2.50E-205 | Omp85 | YP_002513240.1 | outer membrane protein assembly complex, YaeT protein |
| Thioalkalivibrio sulfidophilus HL-EbGr7 | 6.20E-007 | Omp85 | YP_002512533.1 | outer membrane protein, OMP85 family                  |
| Thiomicrospira crunogena XCL-2          | 3.00E-056 | BamB  | YP_390894.1    | Pyrrolo-quinoline quinone                             |
| Thiomicrospira crunogena XCL-2          | 5.10E-069 | BamD  | YP_391640.1    | competence lipoprotein ComL                           |
| Thiomicrospira crunogena XCL-2          | 1.20E-010 | BamE  | YP_391675.1    | SmpA/OmlA                                             |
| Thiomicrospira crunogena XCL-2          | 3.60E-200 | Omp85 | YP_391547.1    | surface antigen (D15)                                 |
| Tolomonas auensis DSM 9187              | 9.80E-155 | BamB  | YP_002892105.1 | outer membrane assembly lipoprotein YfgL              |
| Tolomonas auensis DSM 9187              | 5.80E-020 | BamC  | YP_002892339.1 | NlpBDapX family lipoprotein                           |
| Tolomonas auensis DSM 9187              | 2.70E-133 | BamD  | YP_002893951.1 | outer membrane assembly lipoprotein YfiO              |
| Tolomonas auensis DSM 9187              | 9.80E-036 | BamE  | YP_002893445.1 | SmpA/OmlA domain-containing protein                   |
| Tolomonas auensis DSM 9187              | 1.40E-240 | Omp85 | YP_002893288.1 | outer membrane protein assembly complex, YaeT protein |
| Tolomonas auensis DSM 9187              | 5.20E-006 | Omp85 | YP_002892315.1 | surface antigen (D15)                                 |
| Vibrio anguillarum 775                  | 3.80E-148 | BamB  | YP_004566922.1 | PQQ enzyme repeat family protein                      |
| Vibrio anguillarum 775                  | 5.50E-178 | BamC  | YP_004565637.1 | Lipoprotein-34                                        |
| Vibrio anguillarum 775                  | 2.80E-153 | BamD  | YP_004566969.1 | Lipoprotein, ComL family                              |
| Vibrio anguillarum 775                  | 4.60E-060 | BamE  | YP_004566864.1 | SmpA                                                  |
| Vibrio anguillarum 775                  | 3.10E-231 | Omp85 | YP_004565556.1 | YaeT                                                  |
| Vibrio anguillarum 775                  | 8.30E-006 | Omp85 | YP_004565273.1 | outer membrane protein                                |
| Vibrio cholerae M66-2                   | 7.50E-148 | BamB  | YP_002809492.1 | outer membrane protein assembly complex subunit YfgL  |
| Vibrio cholerae M66-2                   | 2.60E-173 | BamC  | YP_002810832.1 | lipoprotein                                           |
| Vibrio cholerae M66-2                   | 5.90E-153 | BamD  | YP_002809439.1 | hypothetical protein VCM66_0666                       |
| Vibrio cholerae M66-2                   | 3.70E-060 | BamE  | YP_002809578.1 | small protein A                                       |
| Vibrio cholerae M66-2                   | 1.40E-234 | Omp85 | YP_002810927.1 | outer membrane protein assembly factor YaeT           |
| Vibrio cholerae M66-2                   | 2.80E-006 | Omp85 | YP_002811217.1 | hypothetical protein VCM66_2469                       |
| Vibrio cholerae MJ-1236                 | 7.50E-148 | BamB  | YP_002879290.1 | outer membrane protein assembly complex subunit YfgL  |

## gamma\_e-5

|                                              |           |       |                |                                                                                            |
|----------------------------------------------|-----------|-------|----------------|--------------------------------------------------------------------------------------------|
| Vibrio cholerae MJ-1236                      | 2.60E-173 | BamC  | YP_002877955.1 | lipoprotein                                                                                |
| Vibrio cholerae MJ-1236                      | 5.90E-153 | BamD  | YP_002879340.1 | hypothetical protein VCD_003614                                                            |
| Vibrio cholerae MJ-1236                      | 3.70E-060 | BamE  | YP_002879207.1 | lipoprotein SmpA a component of the essential YaeT outer-membrane protein assembly complex |
| Vibrio cholerae MJ-1236                      | 1.40E-234 | Omp85 | YP_002877826.1 | outer membrane protein assembly factor YaeT                                                |
| Vibrio cholerae MJ-1236                      | 3.50E-006 | Omp85 | YP_002877553.1 | uncharacterized protein YtfM precursor                                                     |
| Vibrio cholerae O1 biovar El Tor str. N16961 | 7.50E-148 | BamB  | NP_230411.1    | outer membrane protein assembly complex subunit YfgL                                       |
| Vibrio cholerae O1 biovar El Tor str. N16961 | 2.60E-173 | BamC  | NP_231787.1    | lipoprotein                                                                                |
| Vibrio cholerae O1 biovar El Tor str. N16961 | 5.90E-153 | BamD  | NP_230357.1    | hypothetical protein VC0708                                                                |
| Vibrio cholerae O1 biovar El Tor str. N16961 | 3.70E-060 | BamE  | NP_230498.1    | small protein A                                                                            |
| Vibrio cholerae O1 biovar El Tor str. N16961 | 1.40E-234 | Omp85 | NP_231883.1    | outer membrane protein assembly factor YaeT                                                |
| Vibrio cholerae O1 biovar El Tor str. N16961 | 2.80E-006 | Omp85 | NP_232176.1    | hypothetical protein VC2548                                                                |
| Vibrio cholerae O395                         | 7.50E-148 | BamB  | YP_001216247.1 | outer membrane protein assembly complex subunit YfgL                                       |
| Vibrio cholerae O395                         | 1.40E-172 | BamC  | YP_001217676.1 | lipoprotein                                                                                |
| Vibrio cholerae O395                         | 2.70E-153 | BamD  | YP_001216200.1 | putative lipoprotein                                                                       |
| Vibrio cholerae O395                         | 3.70E-060 | BamE  | YP_001216332.1 | small protein A                                                                            |
| Vibrio cholerae O395                         | 1.40E-234 | Omp85 | YP_001217767.1 | outer membrane protein assembly factor YaeT                                                |
| Vibrio cholerae O395                         | 2.80E-006 | Omp85 | YP_001218042.1 | hypothetical protein VC0395_A2126                                                          |
| Vibrio fischeri ES114                        | 1.40E-155 | BamB  | YP_204015.1    | outer membrane protein assembly complex subunit YfgL                                       |
| Vibrio fischeri ES114                        | 2.10E-164 | BamC  | YP_205300.1    | lipoprotein                                                                                |
| Vibrio fischeri ES114                        | 6.80E-150 | BamD  | YP_203946.1    | lipoprotein component of outer membrane protein assembly complex                           |
| Vibrio fischeri ES114                        | 4.40E-058 | BamE  | YP_205382.1    | small protein A                                                                            |
| Vibrio fischeri ES114                        | 2.70E-232 | Omp85 | YP_205337.1    | outer membrane protein assembly factor YaeT                                                |
| Vibrio fischeri ES114                        | 1.20E-006 | Omp85 | YP_203715.1    | outer membrane protein and surface antigen                                                 |
| Vibrio fischeri MJ11                         | 3.10E-155 | BamB  | YP_002155389.1 | outer membrane assembly lipoprotein YfgL                                                   |
| Vibrio fischeri MJ11                         | 2.00E-164 | BamC  | YP_002156745.1 | lipoprotein-34                                                                             |
| Vibrio fischeri MJ11                         | 6.80E-150 | BamD  | YP_002155321.1 | competence lipoprotein ComL                                                                |
| Vibrio fischeri MJ11                         | 1.90E-057 | BamE  | YP_002156830.1 | small protein A                                                                            |
| Vibrio fischeri MJ11                         | 6.50E-005 | BamE  | YP_002157470.1 | lipoprotein, putative                                                                      |
| Vibrio fischeri MJ11                         | 8.90E-232 | Omp85 | YP_002156782.1 | outer membrane protein assembly complex, YaeT protein                                      |
| Vibrio fischeri MJ11                         | 2.50E-006 | Omp85 | YP_002155090.1 | outer membrane protein                                                                     |
| Vibrio harveyi ATCC BAA-1116                 | 8.90E-144 | BamB  | YP_001444290.1 | outer membrane protein assembly complex subunit YfgL                                       |
| Vibrio harveyi ATCC BAA-1116                 | 3.70E-176 | BamC  | YP_001446362.1 | lipoprotein                                                                                |
| Vibrio harveyi ATCC BAA-1116                 | 1.70E-162 | BamD  | YP_001444230.1 | hypothetical protein VIBHAR_01004                                                          |
| Vibrio harveyi ATCC BAA-1116                 | 1.10E-074 | BamE  | YP_001444345.1 | hypothetical protein VIBHAR_01128                                                          |
| Vibrio harveyi ATCC BAA-1116                 | 6.40E-005 | BamE  | YP_001444676.1 | hypothetical protein VIBHAR_01479                                                          |
| Vibrio harveyi ATCC BAA-1116                 | 2.20E-238 | Omp85 | YP_001446405.1 | outer membrane protein assembly factor YaeT                                                |
| Vibrio harveyi ATCC BAA-1116                 | 1.10E-006 | Omp85 | YP_001444007.1 | hypothetical protein VIBHAR_00779                                                          |

## gamma\_e-5

|                                      |           |       |                |                                                                                            |
|--------------------------------------|-----------|-------|----------------|--------------------------------------------------------------------------------------------|
| Vibrio parahaemolyticus RIMD 2210633 | 9.50E-144 | BamB  | NP_796990.1    | outer membrane protein assembly complex subunit YfgL                                       |
| Vibrio parahaemolyticus RIMD 2210633 | 6.90E-184 | BamC  | NP_798651.1    | lipoprotein                                                                                |
| Vibrio parahaemolyticus RIMD 2210633 | 3.00E-165 | BamD  | NP_796937.1    | hypothetical protein VP0558                                                                |
| Vibrio parahaemolyticus RIMD 2210633 | 8.00E-069 | BamE  | NP_797026.1    | small protein A                                                                            |
| Vibrio parahaemolyticus RIMD 2210633 | 8.20E-237 | Omp85 | NP_798689.1    | outer membrane protein assembly factor YaeT                                                |
| Vibrio parahaemolyticus RIMD 2210633 | 3.40E-006 | Omp85 | NP_796686.1    | hypothetical protein VP0307                                                                |
| Vibrio sp. Ex25                      | 1.30E-141 | BamB  | YP_003286969.1 | YfgL protein                                                                               |
| Vibrio sp. Ex25                      | 1.50E-180 | BamC  | YP_003285421.1 | NlpB lipoprotein component of the protein assembly complex                                 |
| Vibrio sp. Ex25                      | 1.10E-163 | BamD  | YP_003287018.1 | component of the lipoprotein assembly complex                                              |
| Vibrio sp. Ex25                      | 3.80E-069 | BamE  | YP_003286920.1 | lipoprotein SmpA a component of the essential YaeT outer-membrane protein assembly complex |
| Vibrio sp. Ex25                      | 1.80E-237 | Omp85 | YP_003285381.1 | outer membrane protein assembly factor YaeT                                                |
| Vibrio sp. Ex25                      | 3.90E-006 | Omp85 | YP_003284322.1 | hypothetical protein VEA_001694                                                            |
| Vibrio splendidus LGP32              | 7.90E-157 | BamB  | YP_002416265.1 | outer membrane protein assembly complex subunit YfgL                                       |
| Vibrio splendidus LGP32              | 6.30E-176 | BamC  | YP_002417892.1 | lipoprotein                                                                                |
| Vibrio splendidus LGP32              | 5.90E-152 | BamD  | YP_002416214.1 | hypothetical lipoprotein                                                                   |
| Vibrio splendidus LGP32              | 9.30E-065 | BamE  | YP_002416287.1 | small protein A                                                                            |
| Vibrio splendidus LGP32              | 8.80E-005 | BamE  | YP_002416773.1 | hypothetical protein VS_1159                                                               |
| Vibrio splendidus LGP32              | 2.10E-229 | Omp85 | YP_002417931.1 | outer membrane protein assembly factor YaeT                                                |
| Vibrio splendidus LGP32              | 9.10E-007 | Omp85 | YP_002418315.1 | outer membrane protein                                                                     |
| Vibrio vulnificus CMCP6              | 9.50E-146 | BamB  | NP_759420.1    | outer membrane biogenesis protein BamB                                                     |
| Vibrio vulnificus CMCP6              | 2.70E-223 | BamC  | NP_760787.1    | lipoprotein                                                                                |
| Vibrio vulnificus CMCP6              | 4.20E-156 | BamD  | NP_759477.1    | putative component of the lipoprotein assembly complex                                     |
| Vibrio vulnificus CMCP6              | 1.30E-063 | BamE  | NP_759365.1    | outer membrane lipoprotein SmpA                                                            |
| Vibrio vulnificus CMCP6              | 2.90E-239 | Omp85 | NP_760743.1    | outer membrane protein assembly factor YaeT                                                |
| Vibrio vulnificus CMCP6              | 1.90E-006 | Omp85 | NP_759695.1    | hypothetical protein VV1_0712                                                              |
| Vibrio vulnificus MO6-24/O           | 9.50E-146 | BamB  | YP_004189650.1 | outer membrane protein YfgL                                                                |
| Vibrio vulnificus MO6-24/O           | 1.40E-221 | BamC  | YP_004188022.1 | outer membrane protein NlpB                                                                |
| Vibrio vulnificus MO6-24/O           | 2.60E-154 | BamD  | YP_004189705.1 | component of the lipoprotein assembly complex                                              |
| Vibrio vulnificus MO6-24/O           | 1.30E-063 | BamE  | YP_004189620.1 | outer membrane lipoprotein SmpA                                                            |
| Vibrio vulnificus MO6-24/O           | 2.90E-239 | Omp85 | YP_004187979.1 | outer membrane protein assembly factor YaeT                                                |
| Vibrio vulnificus MO6-24/O           | 1.90E-006 | Omp85 | YP_004189932.1 | hypothetical protein VVM_04289                                                             |
| Vibrio vulnificus YJ016              | 9.50E-146 | BamB  | NP_933562.1    | outer membrane protein assembly complex subunit YfgL                                       |
| Vibrio vulnificus YJ016              | 4.90E-222 | BamC  | NP_935296.1    | lipoprotein                                                                                |
| Vibrio vulnificus YJ016              | 4.20E-156 | BamD  | NP_933505.1    | lipoprotein                                                                                |
| Vibrio vulnificus YJ016              | 3.80E-062 | BamE  | NP_933614.1    | small protein A                                                                            |
| Vibrio vulnificus YJ016              | 2.90E-239 | Omp85 | NP_935342.1    | outer membrane protein assembly factor YaeT                                                |
| Vibrio vulnificus YJ016              | 1.90E-006 | Omp85 | NP_933221.1    | outer membrane protein                                                                     |

## gamma\_e-5

|                                                                 |           |       |                |                                                    |
|-----------------------------------------------------------------|-----------|-------|----------------|----------------------------------------------------|
| Wigglesworthia glossinidia endosymbiont of Glossina brevipalpis | 3.20E-013 | BamD  | NP_871537.1    | hypothetical protein WGLp534                       |
| Wigglesworthia glossinidia endosymbiont of Glossina brevipalpis | 4.80E-005 | BamD  | NP_871413.1    | hypothetical protein WGLp410                       |
| Wigglesworthia glossinidia endosymbiont of Glossina brevipalpis | 1.20E-053 | Omp85 | NP_871387.1    | hypothetical protein WGLp384                       |
| Xanthomonas axonopodis pv. citri str. 306                       | 1.10E-115 | BamB  | NP_642346.1    | hypothetical protein XAC2020                       |
| Xanthomonas axonopodis pv. citri str. 306                       | 1.50E-005 | BamB  | NP_641965.1    | glucose dehydrogenase                              |
| Xanthomonas axonopodis pv. citri str. 306                       | 6.50E-005 | BamB  | NP_641001.1    | methanol dehydrogenase heavy chain                 |
| Xanthomonas axonopodis pv. citri str. 306                       | 7.20E-005 | BamB  | NP_644498.1    | polyvinylalcohol dehydrogenase                     |
| Xanthomonas axonopodis pv. citri str. 306                       | 4.90E-074 | BamD  | NP_643526.1    | competence lipoprotein                             |
| Xanthomonas axonopodis pv. citri str. 306                       | 3.70E-019 | BamE  | NP_641849.1    | outer membrane protein                             |
| Xanthomonas axonopodis pv. citri str. 306                       | 4.10E-185 | Omp85 | NP_641748.1    | outer membrane antigen                             |
| Xanthomonas axonopodis pv. citri str. 306                       | 2.40E-006 | Omp85 | NP_644503.1    | hypothetical protein XAC4204                       |
| Xanthomonas campestris pv. campestris str. 8004                 | 3.90E-113 | BamB  | YP_243274.1    | hypothetical protein XC_2198                       |
| Xanthomonas campestris pv. campestris str. 8004                 | 2.20E-005 | BamB  | YP_243728.1    | glucose dehydrogenase                              |
| Xanthomonas campestris pv. campestris str. 8004                 | 2.60E-005 | BamB  | YP_245229.1    | polyvinylalcohol dehydrogenase                     |
| Xanthomonas campestris pv. campestris str. 8004                 | 3.50E-005 | BamB  | YP_241778.1    | methanol dehydrogenase heavy chain                 |
| Xanthomonas campestris pv. campestris str. 8004                 | 1.10E-073 | BamD  | YP_242159.1    | competence lipoprotein                             |
| Xanthomonas campestris pv. campestris str. 8004                 | 2.30E-018 | BamE  | YP_243837.1    | outer membrane protein                             |
| Xanthomonas campestris pv. campestris str. 8004                 | 4.10E-197 | Omp85 | YP_243941.1    | outer membrane antigen                             |
| Xanthomonas campestris pv. campestris str. 8004                 | 4.30E-007 | Omp85 | YP_245234.1    | hypothetical protein XC_4176                       |
| Xanthomonas campestris pv. campestris str. ATCC 33913           | 3.90E-113 | BamB  | NP_637351.1    | hypothetical protein XCC1986                       |
| Xanthomonas campestris pv. campestris str. ATCC 33913           | 1.60E-005 | BamB  | NP_636946.1    | glucose dehydrogenase                              |
| Xanthomonas campestris pv. campestris str. ATCC 33913           | 3.40E-005 | BamB  | NP_639419.1    | polyvinylalcohol dehydrogenase                     |
| Xanthomonas campestris pv. campestris str. ATCC 33913           | 3.50E-005 | BamB  | NP_638828.1    | methanol dehydrogenase heavy chain                 |
| Xanthomonas campestris pv. campestris str. ATCC 33913           | 1.10E-073 | BamD  | NP_638436.1    | competence lipoprotein                             |
| Xanthomonas campestris pv. campestris str. ATCC 33913           | 2.30E-018 | BamE  | NP_636841.1    | outer membrane protein                             |
| Xanthomonas campestris pv. campestris str. ATCC 33913           | 4.10E-197 | Omp85 | NP_636739.1    | outer membrane antigen                             |
| Xanthomonas campestris pv. campestris str. ATCC 33913           | 4.30E-007 | Omp85 | NP_639424.1    | hypothetical protein XCC4085                       |
| Xanthomonas campestris pv. campestris str. B100                 | 3.90E-113 | BamB  | YP_001903690.1 | Putative quinoprotein                              |
| Xanthomonas campestris pv. campestris str. B100                 | 1.50E-005 | BamB  | YP_001905687.1 | exported putative alcohol dehydrogenase (acceptor) |
| Xanthomonas campestris pv. campestris str. B100                 | 2.20E-005 | BamB  | YP_001904090.1 | quinoprotein glucose dehydrogenase                 |
| Xanthomonas campestris pv. campestris str. B100                 | 3.50E-005 | BamB  | YP_001902121.1 | exported alcohol dehydrogenase (acceptor)          |
| Xanthomonas campestris pv. campestris str. B100                 | 1.10E-073 | BamD  | YP_001902508.1 | putative outer membrane lipoprotein                |
| Xanthomonas campestris pv. campestris str. B100                 | 2.30E-018 | BamE  | YP_001904209.1 | Putative outer membrane protein                    |
| Xanthomonas campestris pv. campestris str. B100                 | 4.00E-198 | Omp85 | YP_001904336.1 | outer membrane protein                             |
| Xanthomonas campestris pv. campestris str. B100                 | 1.10E-007 | Omp85 | YP_001905693.1 | Putative outer membrane protein                    |
| Xanthomonas campestris pv. vesicatoria str. 85-10               | 1.10E-114 | BamB  | YP_363802.1    | putative quinoprotein                              |
| Xanthomonas campestris pv. vesicatoria str. 85-10               | 1.90E-005 | BamB  | YP_366031.1    | putative polyvinylalcohol dehydrogenase            |
| Xanthomonas campestris pv. vesicatoria str. 85-10               | 2.00E-005 | BamB  | YP_363404.1    | glucose dehydrogenase                              |

## gamma\_e-5

|                                                   |           |       |                |                                                                                |
|---------------------------------------------------|-----------|-------|----------------|--------------------------------------------------------------------------------|
| Xanthomonas campestris pv. vesicatoria str. 85-10 | 3.10E-005 | BamB  | YP_362439.1    | methanol dehydrogenase heavy chain (fragment)                                  |
| Xanthomonas campestris pv. vesicatoria str. 85-10 | 4.90E-074 | BamD  | YP_365074.1    | putative competence lipoprotein                                                |
| Xanthomonas campestris pv. vesicatoria str. 85-10 | 8.40E-018 | BamE  | YP_363290.1    | putative outer membrane protein                                                |
| Xanthomonas campestris pv. vesicatoria str. 85-10 | 6.40E-185 | Omp85 | YP_363201.1    | outer membrane antigen                                                         |
| Xanthomonas campestris pv. vesicatoria str. 85-10 | 2.90E-006 | Omp85 | YP_366037.1    | putative outer membrane protein                                                |
| Xanthomonas oryzae pv. oryzae KACC10331           | 2.00E-113 | BamB  | YP_201169.1    | hypothetical protein XOO2530                                                   |
| Xanthomonas oryzae pv. oryzae KACC10331           | 8.50E-005 | BamB  | YP_198968.1    | polyvinylalcohol dehydrogenase                                                 |
| Xanthomonas oryzae pv. oryzae KACC10331           | 1.10E-074 | BamD  | YP_200235.1    | competence lipoprotein                                                         |
| Xanthomonas oryzae pv. oryzae KACC10331           | 3.90E-020 | BamE  | YP_200665.1    | outer membrane protein                                                         |
| Xanthomonas oryzae pv. oryzae KACC10331           | 5.90E-197 | Omp85 | YP_200607.1    | outer membrane antigen                                                         |
| Xanthomonas oryzae pv. oryzae KACC10331           | 2.60E-006 | Omp85 | YP_202944.1    | hypothetical protein XOO4305                                                   |
| Xanthomonas oryzae pv. oryzae MAFF 311018         | 2.00E-113 | BamB  | YP_451417.1    | hypothetical protein XOO_2388                                                  |
| Xanthomonas oryzae pv. oryzae MAFF 311018         | 6.70E-006 | BamB  | YP_449330.1    | polyvinylalcohol dehydrogenase                                                 |
| Xanthomonas oryzae pv. oryzae MAFF 311018         | 1.10E-074 | BamD  | YP_450509.1    | competence lipoprotein                                                         |
| Xanthomonas oryzae pv. oryzae MAFF 311018         | 3.90E-020 | BamE  | YP_450937.1    | outer membrane protein                                                         |
| Xanthomonas oryzae pv. oryzae MAFF 311018         | 5.90E-197 | Omp85 | YP_450887.1    | outer membrane antigen                                                         |
| Xanthomonas oryzae pv. oryzae MAFF 311018         | 2.60E-006 | Omp85 | YP_453089.1    | putative outer membrane protein                                                |
| Xanthomonas oryzae pv. oryzae PXO99A              | 2.00E-113 | BamB  | YP_001913832.1 | serine/threonine protein kinase                                                |
| Xanthomonas oryzae pv. oryzae PXO99A              | 2.00E-113 | BamB  | YP_001913641.1 | serine/threonine protein kinase                                                |
| Xanthomonas oryzae pv. oryzae PXO99A              | 1.10E-005 | BamB  | YP_001916000.1 | polyvinylalcohol dehydrogenase                                                 |
| Xanthomonas oryzae pv. oryzae PXO99A              | 2.80E-071 | BamD  | YP_001912669.1 | competence lipoprotein                                                         |
| Xanthomonas oryzae pv. oryzae PXO99A              | 3.90E-020 | BamE  | YP_001914042.1 | outer membrane protein                                                         |
| Xanthomonas oryzae pv. oryzae PXO99A              | 1.50E-186 | Omp85 | YP_001914100.1 | outer membrane antigen                                                         |
| Xanthomonas oryzae pv. oryzae PXO99A              | 4.60E-006 | Omp85 | YP_001911674.1 | pathogenicity protein                                                          |
| Xenorhabdus bovienii SS-2004                      | 4.60E-168 | BamB  | YP_003468892.1 | serine/threonine protein kinase with quinoprotein alcohol dehydrogenase domain |
| Xenorhabdus bovienii SS-2004                      | 2.00E-005 | BamB  | YP_003468085.1 | hypothetical protein XBJ1_2186                                                 |
| Xenorhabdus bovienii SS-2004                      | 5.00E-174 | BamC  | YP_003468521.1 | lipoprotein-34                                                                 |
| Xenorhabdus bovienii SS-2004                      | 1.60E-136 | BamD  | YP_003469142.1 | lipoprotein with tetratricopeptide repeats (TPR) domain                        |
| Xenorhabdus bovienii SS-2004                      | 5.90E-057 | BamE  | YP_003469048.1 | small membrane protein A                                                       |
| Xenorhabdus bovienii SS-2004                      | 2.10E-303 | Omp85 | YP_003466537.1 | outer membrane antigen                                                         |
| Xenorhabdus bovienii SS-2004                      | 2.60E-006 | Omp85 | YP_003466287.1 | outer membrane protein                                                         |
| Xenorhabdus nematophila ATCC 19061                | 1.10E-166 | BamB  | YP_003713490.1 | serine/threonine protein kinase with quinoprotein alcohol dehydrogenase domain |
| Xenorhabdus nematophila ATCC 19061                | 3.70E-005 | BamB  | YP_003710918.1 | hypothetical protein XNC1_0612                                                 |
| Xenorhabdus nematophila ATCC 19061                | 8.90E-194 | BamC  | YP_003712862.1 | lipoprotein-34                                                                 |
| Xenorhabdus nematophila ATCC 19061                | 1.90E-142 | BamD  | YP_003711555.1 | lipoprotein                                                                    |
| Xenorhabdus nematophila ATCC 19061                | 5.30E-059 | BamE  | YP_003713417.1 | small membrane protein A                                                       |
| Xenorhabdus nematophila ATCC 19061                | 9.10E-005 | BamE  | YP_003711376.1 | hypothetical protein XNC1_1096                                                 |

## gamma\_e-5

|                                                      |           |       |                |                                                       |
|------------------------------------------------------|-----------|-------|----------------|-------------------------------------------------------|
| Xenorhabdus nematophila ATCC 19061                   | 5.90E-302 | Omp85 | YP_003714111.1 | outer membrane antigen                                |
| Xenorhabdus nematophila ATCC 19061                   | 2.60E-006 | Omp85 | YP_003710786.1 | outer membrane protein                                |
| Xylella fastidiosa 9a5c                              | 1.60E-094 | BamB  | NP_297754.1    | hypothetical protein XF0464                           |
| Xylella fastidiosa 9a5c                              | 5.10E-007 | BamB  | NP_299538.1    | polyvinylalcohol dehydrogenase                        |
| Xylella fastidiosa 9a5c                              | 4.90E-068 | BamD  | NP_298228.1    | hypothetical protein XF0938                           |
| Xylella fastidiosa 9a5c                              | 2.60E-005 | BamD  | NP_299448.1    | hypothetical protein XF2169                           |
| Xylella fastidiosa 9a5c                              | 8.10E-029 | BamE  | NP_299624.1    | outer membrane protein                                |
| Xylella fastidiosa 9a5c                              | 1.20E-186 | Omp85 | NP_298336.1    | outer membrane antigen                                |
| Xylella fastidiosa 9a5c                              | 4.10E-006 | Omp85 | NP_298521.1    | hypothetical protein XF1231                           |
| Xylella fastidiosa M12                               | 2.90E-097 | BamB  | YP_001776299.1 | serine/threonine protein kinase                       |
| Xylella fastidiosa M12                               | 1.20E-069 | BamD  | YP_001776425.1 | putative lipoprotein                                  |
| Xylella fastidiosa M12                               | 7.30E-028 | BamE  | YP_001776062.1 | outer membrane protein                                |
| Xylella fastidiosa M12                               | 3.50E-187 | Omp85 | YP_001775004.1 | outer membrane antigen                                |
| Xylella fastidiosa M12                               | 4.90E-006 | Omp85 | YP_001775203.1 | pathogenicity protein                                 |
| Xylella fastidiosa M23                               | 2.20E-096 | BamB  | YP_001830390.1 | outer membrane assembly lipoprotein YfgL              |
| Xylella fastidiosa M23                               | 5.40E-008 | BamB  | YP_001830076.1 | Pyrrolo-quinoline quinone                             |
| Xylella fastidiosa M23                               | 5.20E-070 | BamD  | YP_001830531.1 | competence lipoprotein                                |
| Xylella fastidiosa M23                               | 7.30E-028 | BamE  | YP_001830145.1 | SmpA/OmlA domain-containing protein                   |
| Xylella fastidiosa M23                               | 1.30E-186 | Omp85 | YP_001829044.1 | outer membrane protein assembly complex, YaeT protein |
| Xylella fastidiosa M23                               | 1.80E-006 | Omp85 | YP_001829225.1 | surface antigen (D15)                                 |
| Xylella fastidiosa Temecula1                         | 2.20E-096 | BamB  | NP_779811.1    | serine/threonine protein kinase                       |
| Xylella fastidiosa Temecula1                         | 6.60E-007 | BamB  | NP_779499.1    | hypothetical protein PD1299                           |
| Xylella fastidiosa Temecula1                         | 5.20E-070 | BamD  | NP_779941.1    | hypothetical protein PD1756                           |
| Xylella fastidiosa Temecula1                         | 7.30E-028 | BamE  | NP_779573.1    | outer membrane protein                                |
| Xylella fastidiosa Temecula1                         | 1.30E-186 | Omp85 | NP_778561.1    | outer membrane antigen                                |
| Xylella fastidiosa Temecula1                         | 3.20E-006 | Omp85 | NP_778733.1    | pathogenicity protein                                 |
| Yersinia enterocolitica subsp. enterocolitica 8081   | 9.40E-196 | BamB  | YP_001005408.1 | outer membrane protein assembly complex subunit YfgL  |
| Yersinia enterocolitica subsp. enterocolitica 8081   | 3.80E-231 | BamC  | YP_001005466.1 | lipoprotein                                           |
| Yersinia enterocolitica subsp. enterocolitica 8081   | 1.10E-160 | BamD  | YP_001005231.1 | outer membrane protein assembly complex subunit YfiO  |
| Yersinia enterocolitica subsp. enterocolitica 8081   | 8.10E-064 | BamE  | YP_001005330.2 | hypothetical protein YE0997                           |
| Yersinia enterocolitica subsp. enterocolitica 8081   | 0.00E+000 | Omp85 | YP_001007450.1 | outer membrane protein assembly factor YaeT           |
| Yersinia enterocolitica subsp. enterocolitica 8081   | 3.10E-006 | Omp85 | YP_001008367.1 | hypothetical protein YE0405                           |
| Yersinia enterocolitica subsp. palearctica 105.5R(r) | 3.50E-195 | BamB  | YP_004299210.1 | outer membrane protein assembly complex subunit YfgL  |
| Yersinia enterocolitica subsp. palearctica 105.5R(r) | 8.90E-232 | BamC  | YP_004299153.1 | lipoprotein                                           |
| Yersinia enterocolitica subsp. palearctica 105.5R(r) | 1.10E-160 | BamD  | YP_004296857.1 | outer membrane protein assembly complex subunit YfiO  |
| Yersinia enterocolitica subsp. palearctica 105.5R(r) | 2.10E-005 | BamD  | YP_004299537.1 | putative tight adherence operon protein               |
| Yersinia enterocolitica subsp. palearctica 105.5R(r) | 4.10E-005 | BamD  | YP_004299215.1 | putative fimbrial biogenesis protein                  |
| Yersinia enterocolitica subsp. palearctica 105.5R(r) | 8.10E-064 | BamE  | YP_004299287.1 | hypothetical protein YE105_C3090                      |

## gamma\_e-5

|                                                                   |           |       |                |                                                      |
|-------------------------------------------------------------------|-----------|-------|----------------|------------------------------------------------------|
| <i>Yersinia enterocolitica</i> subsp. <i>paleartica</i> 105.5R(r) | 0.00E+000 | Omp85 | YP_004297177.1 | outer membrane protein assembly factor YaeT          |
| <i>Yersinia enterocolitica</i> subsp. <i>paleartica</i> 105.5R(r) | 1.50E-006 | Omp85 | YP_004296627.1 | hypothetical protein YE105_C0426                     |
| <i>Yersinia pestis</i> Angola                                     | 8.50E-197 | BamB  | YP_001605021.1 | outer membrane protein assembly complex subunit YfgL |
| <i>Yersinia pestis</i> Angola                                     | 1.60E-250 | BamC  | YP_001607495.1 | lipoprotein                                          |
| <i>Yersinia pestis</i> Angola                                     | 6.10E-160 | BamD  | YP_001607808.1 | outer membrane protein assembly complex subunit YfiO |
| <i>Yersinia pestis</i> Angola                                     | 1.20E-061 | BamE  | YP_001605901.1 | hypothetical protein YpAngola_A1375                  |
| <i>Yersinia pestis</i> Angola                                     | 0.00E+000 | Omp85 | YP_001607764.1 | outer membrane protein assembly factor YaeT          |
| <i>Yersinia pestis</i> Angola                                     | 3.00E-006 | Omp85 | YP_001608258.1 | OMP85 family outer membrane protein                  |
| <i>Yersinia pestis</i> Antiqua                                    | 8.50E-197 | BamB  | YP_652226.1    | outer membrane protein assembly complex subunit YfgL |
| <i>Yersinia pestis</i> Antiqua                                    | 1.60E-250 | BamC  | YP_652162.1    | lipoprotein                                          |
| <i>Yersinia pestis</i> Antiqua                                    | 6.10E-160 | BamD  | YP_652676.1    | outer membrane protein assembly complex subunit YfiO |
| <i>Yersinia pestis</i> Antiqua                                    | 1.20E-061 | BamE  | YP_650495.1    | hypothetical protein YPA_0582                        |
| <i>Yersinia pestis</i> Antiqua                                    | 0.00E+000 | Omp85 | YP_650441.1    | outer membrane protein assembly factor YaeT          |
| <i>Yersinia pestis</i> Antiqua                                    | 3.40E-006 | Omp85 | YP_649988.1    | hypothetical protein YPA_0074                        |
| <i>Yersinia pestis</i> biovar <i>Microtus</i> str. 91001          | 8.50E-197 | BamB  | NP_994053.1    | outer membrane protein assembly complex subunit YfgL |
| <i>Yersinia pestis</i> biovar <i>Microtus</i> str. 91001          | 1.60E-250 | BamC  | NP_993996.1    | lipoprotein                                          |
| <i>Yersinia pestis</i> biovar <i>Microtus</i> str. 91001          | 6.10E-160 | BamD  | NP_992043.1    | outer membrane protein assembly complex subunit YfiO |
| <i>Yersinia pestis</i> biovar <i>Microtus</i> str. 91001          | 1.20E-061 | BamE  | NP_992425.2    | hypothetical protein YP_1052                         |
| <i>Yersinia pestis</i> biovar <i>Microtus</i> str. 91001          | 0.00E+000 | Omp85 | NP_994105.1    | outer membrane protein assembly factor YaeT          |
| <i>Yersinia pestis</i> biovar <i>Microtus</i> str. 91001          | 3.40E-006 | Omp85 | NP_991952.1    | hypothetical protein YP_0559                         |
| <i>Yersinia pestis</i> CO92                                       | 8.50E-197 | BamB  | YP_002347811.1 | outer membrane protein assembly complex subunit YfgL |
| <i>Yersinia pestis</i> CO92                                       | 1.60E-250 | BamC  | YP_002347981.1 | lipoprotein                                          |
| <i>Yersinia pestis</i> CO92                                       | 6.10E-160 | BamD  | YP_002348178.1 | outer membrane protein assembly complex subunit YfiO |
| <i>Yersinia pestis</i> CO92                                       | 1.20E-061 | BamE  | YP_002346147.1 | hypothetical protein YPO1104                         |
| <i>Yersinia pestis</i> CO92                                       | 0.00E+000 | Omp85 | YP_002346095.1 | outer membrane protein assembly factor YaeT          |
| <i>Yersinia pestis</i> CO92                                       | 3.40E-006 | Omp85 | YP_002348413.1 | hypothetical protein YPO3524                         |
| <i>Yersinia pestis</i> KIM 10                                     | 8.50E-197 | BamB  | NP_668678.1    | outer membrane protein assembly complex subunit YfgL |
| <i>Yersinia pestis</i> KIM 10                                     | 1.60E-250 | BamC  | NP_668740.1    | lipoprotein                                          |
| <i>Yersinia pestis</i> KIM 10                                     | 6.10E-160 | BamD  | NP_668242.1    | outer membrane protein assembly complex subunit YfiO |
| <i>Yersinia pestis</i> KIM 10                                     | 1.20E-061 | BamE  | NP_670375.2    | hypothetical protein y3076                           |
| <i>Yersinia pestis</i> KIM 10                                     | 0.00E+000 | Omp85 | NP_670426.1    | outer membrane protein assembly factor YaeT          |
| <i>Yersinia pestis</i> KIM 10                                     | 3.40E-006 | Omp85 | NP_667996.1    | hypothetical protein y0659                           |
| <i>Yersinia pestis</i> Nepal516                                   | 8.50E-197 | BamB  | YP_647192.1    | outer membrane protein assembly complex subunit YfgL |
| <i>Yersinia pestis</i> Nepal516                                   | 1.60E-250 | BamC  | YP_647254.1    | lipoprotein                                          |
| <i>Yersinia pestis</i> Nepal516                                   | 6.10E-160 | BamD  | YP_646750.1    | outer membrane protein assembly complex subunit YfiO |
| <i>Yersinia pestis</i> Nepal516                                   | 1.20E-061 | BamE  | YP_648821.1    | hypothetical protein YPN_2894                        |
| <i>Yersinia pestis</i> Nepal516                                   | 0.00E+000 | Omp85 | YP_648875.1    | outer membrane protein assembly factor YaeT          |
| <i>Yersinia pestis</i> Nepal516                                   | 3.40E-006 | Omp85 | YP_649195.1    | hypothetical protein YPN_3268                        |

## gamma\_e-5

|                                      |           |       |                |                                                      |
|--------------------------------------|-----------|-------|----------------|------------------------------------------------------|
| Yersinia pestis Pestoides F          | 8.50E-197 | BamB  | YP_001163569.1 | outer membrane protein assembly complex subunit YfgL |
| Yersinia pestis Pestoides F          | 1.60E-250 | BamC  | YP_001163516.1 | lipoprotein                                          |
| Yersinia pestis Pestoides F          | 6.10E-160 | BamD  | YP_001164249.1 | outer membrane protein assembly complex subunit YfiO |
| Yersinia pestis Pestoides F          | 1.20E-061 | BamE  | YP_001163934.1 | hypothetical protein YPDSF_2593                      |
| Yersinia pestis Pestoides F          | 0.00E+000 | Omp85 | YP_001163018.1 | outer membrane protein assembly factor YaeT          |
| Yersinia pestis Pestoides F          | 3.40E-006 | Omp85 | YP_001164896.1 | hypothetical protein YPDSF_3573                      |
| Yersinia pestis Z176003              | 8.50E-197 | BamB  | YP_003568624.1 | putative lipoprotein                                 |
| Yersinia pestis Z176003              | 1.60E-250 | BamC  | YP_003568869.1 | lipoprotein                                          |
| Yersinia pestis Z176003              | 6.10E-160 | BamD  | YP_003569054.1 | putative lipoprotein                                 |
| Yersinia pestis Z176003              | 1.20E-061 | BamE  | YP_003567174.1 | hypothetical protein YPZ3_1002                       |
| Yersinia pestis Z176003              | 2.50E-005 | BamE  | YP_003566489.1 | hypothetical protein YPZ3_0317                       |
| Yersinia pestis Z176003              | 0.00E+000 | Omp85 | YP_003567131.1 | putative surface antigen                             |
| Yersinia pestis Z176003              | 3.40E-006 | Omp85 | YP_003569410.1 | hypothetical protein YPZ3_3239                       |
| Yersinia pseudotuberculosis IP 31758 | 1.30E-196 | BamB  | YP_001400170.1 | outer membrane protein assembly complex subunit YfgL |
| Yersinia pseudotuberculosis IP 31758 | 5.20E-250 | BamC  | YP_001400228.1 | lipoprotein                                          |
| Yersinia pseudotuberculosis IP 31758 | 6.10E-160 | BamD  | YP_001402172.1 | outer membrane protein assembly complex subunit YfiO |
| Yersinia pseudotuberculosis IP 31758 | 1.50E-061 | BamE  | YP_001401853.1 | hypothetical protein YpsIP31758_2890                 |
| Yersinia pseudotuberculosis IP 31758 | 0.00E+000 | Omp85 | YP_001400005.1 | outer membrane protein assembly factor YaeT          |
| Yersinia pseudotuberculosis IP 31758 | 3.40E-006 | Omp85 | YP_001402579.1 | OMP85 family outer membrane protein                  |
| Yersinia pseudotuberculosis IP 32953 | 1.30E-196 | BamB  | YP_071345.1    | outer membrane protein assembly complex subunit YfgL |
| Yersinia pseudotuberculosis IP 32953 | 5.20E-250 | BamC  | YP_071289.1    | lipoprotein                                          |
| Yersinia pseudotuberculosis IP 32953 | 6.10E-160 | BamD  | YP_069386.1    | outer membrane protein assembly complex subunit YfiO |
| Yersinia pseudotuberculosis IP 32953 | 1.20E-061 | BamE  | YP_069673.2    | hypothetical protein YPTB1138                        |
| Yersinia pseudotuberculosis IP 32953 | 0.00E+000 | Omp85 | YP_071501.1    | outer membrane protein assembly factor YaeT          |
| Yersinia pseudotuberculosis IP 32953 | 3.40E-006 | Omp85 | YP_068995.1    | hypothetical protein YPTB0452                        |
| Yersinia pseudotuberculosis PB1/+    | 1.30E-196 | BamB  | YP_001873361.1 | outer membrane protein assembly complex subunit YfgL |
| Yersinia pseudotuberculosis PB1/+    | 5.20E-250 | BamC  | YP_001873302.1 | lipoprotein                                          |
| Yersinia pseudotuberculosis PB1/+    | 6.10E-160 | BamD  | YP_001871325.1 | outer membrane protein assembly complex subunit YfiO |
| Yersinia pseudotuberculosis PB1/+    | 1.20E-061 | BamE  | YP_001871647.1 | hypothetical protein YPTS_1215                       |
| Yersinia pseudotuberculosis PB1/+    | 0.00E+000 | Omp85 | YP_001873527.1 | outer membrane protein assembly factor YaeT          |
| Yersinia pseudotuberculosis PB1/+    | 3.40E-006 | Omp85 | YP_001870925.1 | surface antigen (D15)                                |
